# Supplementary material for: Neuronal cell cycle reentry events in the aging brain are more prevalent in neurodegeneration and lead to cellular senescence
Source: PLoS Biol. 2024 Apr 23;22(4):e3002559. doi: 10.1371/journal.pbio.3002559 (PMC11037540; doi:10.1371/journal.pbio.3002559)
Supplement: S1 Table — (XLSX) [file pbio.3002559.s025.xlsx]

## Sheet: Sheet1
Table.S1. Details of patient sample demographics and related clinical information.
								Sample number
Purpose	Study	Associated Study PubMed ID	Dataset location	Dataset identity	Brain region	Status of samples extracted	Age range (years)	Unaffected male	Unaffected female	Affected male	Affected female
Discovery	Mathys et al. [1]	PMID: 31042697	SYNAPSE/ AD-knowledge portal	syn18485175	Cerebral cortex, BA10	Unffected (ND) and affected (AD)	75-90+	12	12	12	12
Validation	Lau et al. [2]	PMID: 32989152	GEO Omnibus	GSE157827	Cerebral cortex, BA6, BA8 and BA9	Unffected (ND) and affected (AD)	60-95	8	4	6	3
Validation	Yang et al. [3]	PMID: 34153974	GEO Omnibus	GSE159812	Cerebral cortex, BA9-12	Unaffected (ND)	58-90	7	1	0	0
Validation	Nagy et al. [4]	PMID: 32341540	GEO Omnibus	GSE144136	Cerebral cortex, BA9-12	Unaffected (ND)	38.4	17	0	0	0
Validation	Kamath et al [5]	PMID: 35513515	GEO Omnibus	GSE178265	Mid-brain and dorsal striatum	Unffected (ND) and affected (PD/LBD)	50-80	2	6	6	4
Validation	Allen et al. [6]	PMID: 36580914	GEO Omnibus	GSE207848	Mouse frontal cortex	Wildtype C57B:/6J	21 months
The detail phenotype for each sample in our analysis
Sample	Author	Age	Gender	Status	Nuclei (Ex)	AveGeneNumber	AveGeneCount	Journal. Published time
20956867	Hansruedi Mathys	79	Female	Control	292	3767.97	8601.86	Nature. 2019 Jun
20254740	Hansruedi Mathys	82	Female	Control	1161	1020.81	1492.4	Nature. 2019 Jun
20179164	Hansruedi Mathys	84	Female	Control	402	3863.9	8199.25	Nature. 2019 Jun
20249897	Hansruedi Mathys	87	Female	Control	528	3206.46	6692.55	Nature. 2019 Jun
20275399	Hansruedi Mathys	88	Female	Control	586	3278.87	6766.45	Nature. 2019 Jun
21142003	Hansruedi Mathys	89	Female	Control	662	3469.46	7101.15	Nature. 2019 Jun
20104101	Hansruedi Mathys	90	Female	Control	630	4516.24	10567.7	Nature. 2019 Jun
20149910	Hansruedi Mathys	90	Female	Control	639	3348.11	6252.05	Nature. 2019 Jun
20207013	Hansruedi Mathys	90	Female	Control	1264	3271.67	6792.45	Nature. 2019 Jun
20977678	Hansruedi Mathys	90	Female	Control	899	1596.91	2635.69	Nature. 2019 Jun
21126823	Hansruedi Mathys	90	Female	Control	1050	1663.44	2606.17	Nature. 2019 Jun
21412626	Hansruedi Mathys	90	Female	Control	597	2764.15	5397.69	Nature. 2019 Jun
10288185	Hansruedi Mathys	77	Male	Control	1534	2813.59	4960.47	Nature. 2019 Jun
10102206	Hansruedi Mathys	80	Male	Control	103	708.951	942.379	Nature. 2019 Jun
10514454	Hansruedi Mathys	80	Male	Control	610	3451.04	7363.21	Nature. 2019 Jun
11409232	Hansruedi Mathys	80	Male	Control	312	3154.24	6462.84	Nature. 2019 Jun
10261026	Hansruedi Mathys	81	Male	Control	830	2652.61	5280.75	Nature. 2019 Jun
10101291	Hansruedi Mathys	83	Male	Control	1125	1399.16	2247.61	Nature. 2019 Jun
10536568	Hansruedi Mathys	85	Male	Control	1009	2478.11	4318.67	Nature. 2019 Jun
11399871	Hansruedi Mathys	86	Male	Control	408	3210.25	6333.26	Nature. 2019 Jun
11399321	Hansruedi Mathys	87	Male	Control	433	2484.3	4804.28	Nature. 2019 Jun
10260309	Hansruedi Mathys	88	Male	Control	412	3370.16	6846.32	Nature. 2019 Jun
11072071	Hansruedi Mathys	88	Male	Control	726	2702.42	5185.4	Nature. 2019 Jun
11342432	Hansruedi Mathys	90	Male	Control	724	3590.81	7248.55	Nature. 2019 Jun
20112377	Hansruedi Mathys	75	Female	Alzheimer	663	3328.51	7201.9	Nature. 2019 Jun
21172121	Hansruedi Mathys	76	Female	Alzheimer	540	992.522	1425.27	Nature. 2019 Jun
76647134	Hansruedi Mathys	81	Female	Alzheimer	801	1969.09	3301.44	Nature. 2019 Jun
21159840	Hansruedi Mathys	83	Female	Alzheimer	628	606.839	763.301	Nature. 2019 Jun
20963866	Hansruedi Mathys	84	Female	Alzheimer	509	1736.25	2889.5	Nature. 2019 Jun
20282398	Hansruedi Mathys	87	Female	Alzheimer	604	3814.01	8367.16	Nature. 2019 Jun
20978133	Hansruedi Mathys	88	Female	Alzheimer	641	1362.22	2157.02	Nature. 2019 Jun
20170043	Hansruedi Mathys	90	Female	Alzheimer	1813	1194.38	1725.69	Nature. 2019 Jun
20173942	Hansruedi Mathys	90	Female	Alzheimer	548	1951.79	3453.68	Nature. 2019 Jun
20261901	Hansruedi Mathys	90	Female	Alzheimer	957	1959.39	3277.38	Nature. 2019 Jun
21135554	Hansruedi Mathys	90	Female	Alzheimer	1167	2506.15	4841.7	Nature. 2019 Jun
21189544	Hansruedi Mathys	90	Female	Alzheimer	1220	3212.62	6355.28	Nature. 2019 Jun
11310718	Hansruedi Mathys	81	Male	Alzheimer	262	3614.9	7361.58	Nature. 2019 Jun
11630705	Hansruedi Mathys	83	Male	Alzheimer	618	1813	3277.5	Nature. 2019 Jun
11200645	Hansruedi Mathys	84	Male	Alzheimer	481	3189.58	6349.91	Nature. 2019 Jun
10222853	Hansruedi Mathys	86	Male	Alzheimer	813	3193.87	6176.96	Nature. 2019 Jun
10290265	Hansruedi Mathys	86	Male	Alzheimer	1824	711.874	960.637	Nature. 2019 Jun
11302830	Hansruedi Mathys	86	Male	Alzheimer	217	4234.49	9293.96	Nature. 2019 Jun
11609672	Hansruedi Mathys	86	Male	Alzheimer	588	3751.72	8262.15	Nature. 2019 Jun
11159965	Hansruedi Mathys	87	Male	Alzheimer	955	1570.32	2634.13	Nature. 2019 Jun
11345331	Hansruedi Mathys	87	Male	Alzheimer	622	1771.98	2856.06	Nature. 2019 Jun
10248033	Hansruedi Mathys	88	Male	Alzheimer	847	1750.3	3169.97	Nature. 2019 Jun
11336574	Hansruedi Mathys	89	Male	Alzheimer	119	2313.3	5347.8	Nature. 2019 Jun
10101327	Hansruedi Mathys	90	Male	Alzheimer	426	3586.69	7683.71	Nature. 2019 Jun
GSM4775577	Shun-Fat Lau	74	Female	Control	3958	3391.6	8941.76	PNAS. 2020 Oct
GSM4775578	Shun-Fat Lau	79	Female	Control	4900	2986.6	7531.63	PNAS. 2020 Oct
GSM4775581	Shun-Fat Lau	94	Female	Control	2994	2919.78	7965.35	PNAS. 2020 Oct
GSM4775580	Shun-Fat Lau	78	Male	Control	5862	3027.99	7803.65	PNAS. 2020 Oct
GSM4775576	Shun-Fat Lau	85	Male	Control	4984	3231.97	8646.71	PNAS. 2020 Oct
GSM4775575	Shun-Fat Lau	87	Male	Control	710	1157.68	1906.56	PNAS. 2020 Oct
GSM4775579	Shun-Fat Lau	89	Male	Control	2022	568.218	761.912	PNAS. 2020 Oct
GSM4775574	Shun-Fat Lau	90	Male	Control	2349	3818.21	10657.9	PNAS. 2020 Oct
GSM4775573	Shun-Fat Lau	93	Male	Control	2158	2875.94	7052.08	PNAS. 2020 Oct
GSM4775567	Shun-Fat Lau	60	Female	Alzheimer	3081	2198.16	4247.16	PNAS. 2020 Oct
GSM4775563	Shun-Fat Lau	72	Female	Alzheimer	1779	2045.44	4494.45	PNAS. 2020 Oct
GSM4775569	Shun-Fat Lau	78	Female	Alzheimer	663	2713.92	6579.58	PNAS. 2020 Oct
GSM4775570	Shun-Fat Lau	87	Female	Alzheimer	1473	2433.98	5922.31	PNAS. 2020 Oct
GSM4775565	Shun-Fat Lau	62	Male	Alzheimer	177	774.424	1123.01	PNAS. 2020 Oct
GSM4775572	Shun-Fat Lau	63	Male	Alzheimer	3273	2260.58	4729.95	PNAS. 2020 Oct
GSM4775561	Shun-Fat Lau	69	Male	Alzheimer	1994	3480.13	11723.1	PNAS. 2020 Oct
GSM4775566	Shun-Fat Lau	69	Male	Alzheimer	727	2766.93	7134.15	PNAS. 2020 Oct
GSM4775562	Shun-Fat Lau	71	Male	Alzheimer	3834	3617.42	10479.6	PNAS. 2020 Oct
GSM4775571	Shun-Fat Lau	84	Male	Alzheimer	2540	3090.28	8055.53	PNAS. 2020 Oct
GSM4775564	Shun-Fat Lau	85	Male	Alzheimer	5007	2132.9	4140.35	PNAS. 2020 Oct
GSM4775568	Shun-Fat Lau	95	Male	Alzheimer	7454	2725.69	6067.3	PNAS. 2020 Oct
B12	Corina Nagy	Mean: 38	Male	Control	1067	2466.53	5002.46	Nat Neurosci. 2020 Jun
B13	Corina Nagy	Mean: 38	Male	Control	1424	1967.13	3358.82	Nat Neurosci. 2020 Jun
B15	Corina Nagy	Mean: 38	Male	Control	2096	2565.67	4963.52	Nat Neurosci. 2020 Jun
B16	Corina Nagy	Mean: 38	Male	Control	392	2333.4	3884.19	Nat Neurosci. 2020 Jun
B19	Corina Nagy	Mean: 38	Male	Control	1550	2133.72	3630.41	Nat Neurosci. 2020 Jun
B2	Corina Nagy	Mean: 38	Male	Control	1016	1544.19	2334.67	Nat Neurosci. 2020 Jun
B20	Corina Nagy	Mean: 38	Male	Control	2002	2757.7	5907.48	Nat Neurosci. 2020 Jun
B21	Corina Nagy	Mean: 38	Male	Control	1274	3011.7	6580.75	Nat Neurosci. 2020 Jun
B22	Corina Nagy	Mean: 38	Male	Control	1490	1800.21	3184.04	Nat Neurosci. 2020 Jun
B24	Corina Nagy	Mean: 38	Male	Control	492	1037.69	1531.28	Nat Neurosci. 2020 Jun
B25	Corina Nagy	Mean: 38	Male	Control	113	557.788	765.805	Nat Neurosci. 2020 Jun
B27	Corina Nagy	Mean: 38	Male	Control	492	1843.69	3193.25	Nat Neurosci. 2020 Jun
B29	Corina Nagy	Mean: 38	Male	Control	1212	1748.6	2962.19	Nat Neurosci. 2020 Jun
B3	Corina Nagy	Mean: 38	Male	Control	434	1927.41	3481.77	Nat Neurosci. 2020 Jun
B31	Corina Nagy	Mean: 38	Male	Control	1377	2171.6	4233.9	Nat Neurosci. 2020 Jun
B7	Corina Nagy	Mean: 38	Male	Control	1443	1849.15	3235.31	Nat Neurosci. 2020 Jun
B9	Corina Nagy	Mean: 38	Male	Control	516	1932.62	3444.23	Nat Neurosci. 2020 Jun
GSM4848450	Andrew C. Yang	79	Female	Control	862	2967.46	7749.18	Nature. 2021 Jul
GSM4848447	Andrew C. Yang	58	Male	Control	436	2953.4	7096.02	Nature. 2021 Jul
GSM5171530	Andrew C. Yang	63	Male	Control	1192	3648.27	11712.5	Nature. 2021 Jul
GSM4848446	Andrew C. Yang	66	Male	Control	1812	1652.75	2827.11	Nature. 2021 Jul
GSM4848448	Andrew C. Yang	77	Male	Control	1034	3439.22	9942.16	Nature. 2021 Jul
GSM4848449	Andrew C. Yang	82	Male	Control	708	3567.84	10499.2	Nature. 2021 Jul
GSM5171529	Andrew C. Yang	83	Male	Control	895	2135.77	5531.76	Nature. 2021 Jul
GSM5171528	Andrew C. Yang	90	Male	Control	1145	3825.11	15437.4	Nature. 2021 Jul
Dataset used to analysis the dopamine neurons
SampleId	Author	Age	Gender	Status	Nuclei (DA neurons)	AveGeneNumber	AveGeneCount	Journal. Published time
3322	Tushar Kamath	90	Female	Control	387	5971.27	33764.2	Nat Neurosci. 2022 May
3345	Tushar Kamath	82	Female	Control	2909	5247.71	19144.3	Nat Neurosci. 2022 May
3346	Tushar Kamath	91	Female	Control	1435	7857.92	53341.2	Nat Neurosci. 2022 May
3482	Tushar Kamath	79	Female	Control	1587	10126.1	93061	Nat Neurosci. 2022 May
4956	Tushar Kamath	92	Female	Control	6471	5447.46	23412.6	Nat Neurosci. 2022 May
5610	Tushar Kamath	49	Female	Control	539	9063.6	53838.2	Nat Neurosci. 2022 May
3298	Tushar Kamath	79	Male	Control	56	5060.57	25880.2	Nat Neurosci. 2022 May
6173	Tushar Kamath	49	Male	Control	1474	6016.06	21800.7	Nat Neurosci. 2022 May
2544	Tushar Kamath	89	Female	Lewy body dementia	536	8680.01	52207.7	Nat Neurosci. 2022 May
2561	Tushar Kamath	70	Female	Lewy body dementia	34	6642.79	41566.6	Nat Neurosci. 2022 May
2569	Tushar Kamath	74	Male	Lewy body dementia	1617	6473.94	27252	Nat Neurosci. 2022 May
4775	Tushar Kamath	75	Male	Lewy body dementia	71	8624.13	92611.4	Nat Neurosci. 2022 May
3873	Tushar Kamath	76	Female	Parkinson	188	7429.59	46568.7	Nat Neurosci. 2022 May
4560	Tushar Kamath	83	Female	Parkinson	1925	6992.54	45192.7	Nat Neurosci. 2022 May
1963	Tushar Kamath	82	Male	Parkinson	12	5296.75	25980.2	Nat Neurosci. 2022 May
2142	Tushar Kamath	90	Male	Parkinson	19	3841.89	11189.7	Nat Neurosci. 2022 May
3887	Tushar Kamath	82	Male	Parkinson	78	4979.94	18630.1	Nat Neurosci. 2022 May
4568	Tushar Kamath	78	Male	Parkinson	3	5785.67	30759.7	Nat Neurosci. 2022 May
Dataset from mouse in our analysis
Sample	Age	Strain	Tissue
GSM6321077	90 week old	C57BL6J	Brain
GSM6321078	90 week old	C57BL6J	Brain
GSM6321079	90 week old	C57BL6J	Brain
GSM6321080	90 week old	C57BL6J	Brain
Reference
1. Mathys H, Davila-Velderrain J, Peng Z, Gao F, Mohammadi S, Young JZ, et al. Single-cell transcriptomic analysis of Alzheimer's disease. Nature. 2019;570(7761):332-7. Epub 2019/05/03. doi: 10.1038/s41586-019-1195-2. PubMed PMID: 31042697; PubMed Central PMCID: PMCPMC6865822.
2. Lau SF, Cao H, Fu AKY, Ip NY. Single-nucleus transcriptome analysis reveals dysregulation of angiogenic endothelial cells and neuroprotective glia in Alzheimer's disease. Proc Natl Acad Sci U S A. 2020;117(41):25800-9. Epub 2020/09/30. doi: 10.1073/pnas.2008762117. PubMed PMID: 32989152; PubMed Central PMCID: PMCPMC7568283.
3. Yang AC, Kern F, Losada PM, Agam MR, Maat CA, Schmartz GP, et al. Dysregulation of brain and choroid plexus cell types in severe COVID-19. Nature. 2021;595(7868):565-71. Epub 2021/06/22. doi: 10.1038/s41586-021-03710-0. PubMed PMID: 34153974; PubMed Central PMCID: PMCPMC8400927.
4. Nagy C, Maitra M, Tanti A, Suderman M, Theroux JF, Davoli MA, et al. Single-nucleus transcriptomics of the prefrontal cortex in major depressive disorder implicates oligodendrocyte precursor cells and excitatory neurons. Nat Neurosci. 2020;23(6):771-81. Epub 2020/04/29. doi: 10.1038/s41593-020-0621-y. PubMed PMID: 32341540.
5. Kamath T, Abdulraouf A, Burris SJ, Langlieb J, Gazestani V, Nadaf NM, et al. Single-cell genomic profiling of human dopamine neurons identifies a population that selectively degenerates in Parkinson's disease. Nat Neurosci. 2022;25(5):588-95. Epub 2022/05/06. doi: 10.1038/s41593-022-01061-1. PubMed PMID: 35513515; PubMed Central PMCID: PMCPMC9076534.
6. Allen WE, Blosser TR, Sullivan ZA, Dulac C, Zhuang X. Molecular and spatial signatures of mouse brain aging at single-cell resolution. Cell. 2023;186(1):194-208 e18. Epub 2022/12/30. doi: 10.1016/j.cell.2022.12.010. PubMed PMID: 36580914; PubMed Central PMCID: PMCPMC10024607.
