# Supplementary material for: Neuronal cell cycle reentry events in the aging brain are more prevalent in neurodegeneration and lead to cellular senescence
Source: PLoS Biol. 2024 Apr 23;22(4):e3002559. doi: 10.1371/journal.pbio.3002559 (PMC11037540; doi:10.1371/journal.pbio.3002559)
Supplement: S2 Table — (XLSX) [file pbio.3002559.s026.xlsx]

## Sheet: Whitfield et al.
Table S2. Original cell cycle gene lists extracted from Whitfield et al. [1] and Tirosh et al. [2] studies and the final refined gene list.
1. Whitfield et al. [1] study gene list
CLONEID	ACC	LLID	PHASE	NAME	Annotation	Name_Annot
IMAGE:843319	AA485958	3267	M/G1	HRB HIV-1 Rev binding protein Hs.171545	transport| RNA localization| | | | | | | | | | | |	M/G1 HRB HIV-1 Rev binding protein Hs.171545 AA485958 transport| RNA localization| | | | | | | | | | | |
IMAGE:810092	AA465031	9266	G2	PSCD2 pleckstrin homology, Sec7 and coiled/coil domains 2 (cytohesin-2) Hs.303091	transport| obsolete| | | | | | | | | | | |	G2 PSCD2 pleckstrin homology, Sec7 and coiled/coil domains 2 (cytohesin-2) Hs.303091 AA465031 transport| obsolete| | | | | | | | | | | |
IMAGE:564537	L38951	3837	M/G1	KPNB1 karyopherin (importin) beta 1 Hs.180446 AA121732	transport| metabolism| transport| metabolism| | | | | | | | | |	M/G1 KPNB1 karyopherin (importin) beta 1 Hs.180446 AA121732 L38951 transport| metabolism| transport| metabolism| | | | | | | | | |
IMAGE:366105	AA071526	5514	G2/M	PPP1R10 protein phosphatase 1, regulatory subunit 10 Hs.106019	transport| metabolism| | | | | | | | | | | |	G2/M PPP1R10 protein phosphatase 1, regulatory subunit 10 Hs.106019 AA071526 transport| metabolism| | | | | | | | | | | |
IMAGE:112906	T75485	5514	G2/M	PPP1R10 protein phosphatase 1, regulatory subunit 10 Hs.106019	transport| metabolism| | | | | | | | | | | |	G2/M PPP1R10 protein phosphatase 1, regulatory subunit 10 Hs.106019 T75485 transport| metabolism| | | | | | | | | | | |
IMAGE:840062	AA490249	473	G2/M	RERE arginine-glutamic acid dipeptide (RE) repeats Hs.194369	transport| metabolism| | | | | | | | | | | |	G2/M RERE arginine-glutamic acid dipeptide (RE) repeats Hs.194369 AA490249 transport| metabolism| | | | | | | | | | | |
IMAGE:207920	H60423	10246	G2/M	SLC17A2 solute carrier family 17 (sodium phosphate), member 2 Hs.19710	transport| metabolism| | | | | | | | | | | |	G2/M SLC17A2 solute carrier family 17 (sodium phosphate), member 2 Hs.19710 H60423 transport| metabolism| | | | | | | | | | | |
IMAGE:814662	NM_006594	10717	G1/S	AP4B1 adaptor-related protein complex 4, beta 1 subunit Hs.28298 AA481045	transport| | | | | | | | | | | | |	G1/S AP4B1 adaptor-related protein complex 4, beta 1 subunit Hs.28298 AA481045 NM_006594 transport| | | | | | | | | | | | |
IMAGE:744050	AA629264	9265	M/G1	PSCD3 pleckstrin homology, Sec7 and coiled/coil domains 3 Hs.7984	transport| | | | | | | | | | | | |	M/G1 PSCD3 pleckstrin homology, Sec7 and coiled/coil domains 3 Hs.7984 AA629264 transport| | | | | | | | | | | | |
IMAGE:813845	AA453730	10073	M/G1	RNUT1 RNA, U transporter 1 Hs.21577	transport| | | | | | | | | | | | |	M/G1 RNUT1 RNA, U transporter 1 Hs.21577 AA453730 transport| | | | | | | | | | | | |
IMAGE:795603	AA460012	6581	S phase	SLC22A3 solute carrier family 22 (extraneuronal monoamine transporter), member 3 Hs.81086	transport| | | | | | | | | | | | |	S phase SLC22A3 solute carrier family 22 (extraneuronal monoamine transporter), member 3 Hs.81086 AA460012 transport| | | | | | | | | | | | |
IMAGE:731356	AA416787	10226	M/G1	TIP47 cargo selection protein (mannose 6 phosphate receptor binding protein) Hs.140452	transport| | | | | | | | | | | | |	M/G1 TIP47 cargo selection protein (mannose 6 phosphate receptor binding protein) Hs.140452 AA416787 transport| | | | | | | | | | | | |
IMAGE:127860	R08897	30000	G2	TRN2 karyopherin beta 2b, transportin Hs.278378	transport| | | | | | | | | | | | |	G2 TRN2 karyopherin beta 2b, transportin Hs.278378 R08897 transport| | | | | | | | | | | | |
IMAGE:856427	NM_004237	9319	G2/M	TRIP13 thyroid hormone receptor interactor 13 Hs.6566 AA630784	transcription| | | | | | | | | | | | |	G2/M TRIP13 thyroid hormone receptor interactor 13 Hs.6566 AA630784 NM_004237 transcription| | | | | | | | | | | | |
IMAGE:302549	W38326	687	G2/M	BTEB1 basic transcription element binding protein 1 Hs.150557	transcription| | | | | | | | | | | | |	G2/M BTEB1 basic transcription element binding protein 1 Hs.150557 W38326 transcription| | | | | | | | | | | | |
IMAGE:366067	AA074613	1039	G2	CDR2 cerebellar degeneration-related protein (62kD) Hs.75124	transcription| | | | | | | | | | | | |	G2 CDR2 cerebellar degeneration-related protein (62kD) Hs.75124 AA074613 transcription| | | | | | | | | | | | |
IMAGE:240367	H89996	10664	G2/M	CTCF CCCTC-binding factor (zinc finger protein) Hs.57419	transcription| | | | | | | | | | | | |	G2/M CTCF CCCTC-binding factor (zinc finger protein) Hs.57419 H89996 transcription| | | | | | | | | | | | |
IMAGE:487797	AA044623	1810	G2/M	DR1 down-regulator of transcription 1, TBP-binding (negative cofactor 2) Hs.16697	transcription| | | | | | | | | | | | |	G2/M DR1 down-regulator of transcription 1, TBP-binding (negative cofactor 2) Hs.16697 AA044623 transcription| | | | | | | | | | | | |
IMAGE:566760	AA132007	1810	G2/M	DR1 down-regulator of transcription 1, TBP-binding (negative cofactor 2) Hs.16697	transcription| | | | | | | | | | | | |	G2/M DR1 down-regulator of transcription 1, TBP-binding (negative cofactor 2) Hs.16697 AA132007 transcription| | | | | | | | | | | | |
IMAGE:471200	AA033532	51042	M/G1	LOC51042 zinc finger protein Hs.102419	transcription| | | | | | | | | | | | |	M/G1 LOC51042 zinc finger protein Hs.102419 AA033532 transcription| | | | | | | | | | | | |
IMAGE:884438	AA629687	4780	S phase	NFE2L2 nuclear factor (erythroid-derived 2)-like 2 Hs.155396	transcription| | | | | | | | | | | | |	S phase NFE2L2 nuclear factor (erythroid-derived 2)-like 2 Hs.155396 AA629687 transcription| | | | | | | | | | | | |
IMAGE:265874	N20996	4782	M/G1	NFIC nuclear factor I/C (CCAAT-binding transcription factor) Hs.184771	transcription| | | | | | | | | | | | |	M/G1 NFIC nuclear factor I/C (CCAAT-binding transcription factor) Hs.184771 N20996 transcription| | | | | | | | | | | | |
IMAGE:843069	AA488619	11137	G2/M	PWP1 nuclear phosphoprotein similar to S. cerevisiae PWP1 Hs.172589	transcription| | | | | | | | | | | | |	G2/M PWP1 nuclear phosphoprotein similar to S. cerevisiae PWP1 Hs.172589 AA488619 transcription| | | | | | | | | | | | |
IMAGE:757165	AA444129	6944	G1/S	TCFL1 transcription factor-like 1 Hs.2430	transcription| | | | | | | | | | | | |	G1/S TCFL1 transcription factor-like 1 Hs.2430 AA444129 transcription| | | | | | | | | | | | |
IMAGE:773208	AA425650	9323	M/G1	TRIP8 thyroid hormone receptor interactor 8 Hs.6685	transcription| | | | | | | | | | | | |	M/G1 TRIP8 thyroid hormone receptor interactor 8 Hs.6685 AA425650 transcription| | | | | | | | | | | | |
IMAGE:868630	AA664389	8848	M/G1	TSC22 transforming growth factor beta-stimulated protein TSC-22 Hs.114360	transcription| | | | | | | | | | | | |	M/G1 TSC22 transforming growth factor beta-stimulated protein TSC-22 Hs.114360 AA664389 transcription| | | | | | | | | | | | |
IMAGE:1643615	AI023603	8458	G2	TTF2 transcription termination factor, RNA polymerase II Hs.142157	transcription| | | | | | | | | | | | |	G2 TTF2 transcription termination factor, RNA polymerase II Hs.142157 AI023603 transcription| | | | | | | | | | | | |
IMAGE:280750	N47469	23528	M/G1	ZNF281 zinc finger protein 281 Hs.59757	transcription| | | | | | | | | | | | |	M/G1 ZNF281 zinc finger protein 281 Hs.59757 N47469 transcription| | | | | | | | | | | | |
IMAGE:1570365	AA932642	7593	S phase	ZNF42 zinc finger protein 42 (myeloid-specific retinoic acid- responsive) Hs.169832	transcription| | | | | | | | | | | | |	S phase ZNF42 zinc finger protein 42 (myeloid-specific retinoic acid- responsive) Hs.169832 AA932642 transcription| | | | | | | | | | | | |
IMAGE:1605099	AA987906	7593	G1/S	ZNF42 zinc finger protein 42 (myeloid-specific retinoic acid- responsive) Hs.169832	transcription| | | | | | | | | | | | |	G1/S ZNF42 zinc finger protein 42 (myeloid-specific retinoic acid- responsive) Hs.169832 AA987906 transcription| | | | | | | | | | | | |
IMAGE:769003	AA424756	6446	M/G1	SGK serum/glucocorticoid regulated kinase Hs.296323	stress response| transport| protein modification| metabolism| | | | | | | | | |	M/G1 SGK serum/glucocorticoid regulated kinase Hs.296323 AA424756 stress response| transport| protein modification| metabolism| | | | | | | | | |
IMAGE:134495	R27712	6446	M/G1	SGK serum/glucocorticoid regulated kinase Hs.296323	stress response| transport| protein modification| metabolism| | | | | | | | | |	M/G1 SGK serum/glucocorticoid regulated kinase Hs.296323 R27712 stress response| transport| protein modification| metabolism| | | | | | | | | |
IMAGE:136814	R36085	6446	M/G1	SGK serum/glucocorticoid regulated kinase Hs.296323	stress response| transport| protein modification| metabolism| | | | | | | | | |	M/G1 SGK serum/glucocorticoid regulated kinase Hs.296323 R36085 stress response| transport| protein modification| metabolism| | | | | | | | | |
IMAGE:897806	AA598526	3091	M/G1	HIF1A hypoxia-inducible factor 1, alpha subunit (basic helix-loop-helix transcription factor) Hs.197540	stress response| transcription| | | | | | | | | | | |	M/G1 HIF1A hypoxia-inducible factor 1, alpha subunit (basic helix-loop-helix transcription factor) Hs.197540 AA598526 stress response| transcription| | | | | | | | | | | |
IMAGE:590774	AA158169	5603	G2/M	MAPK13 mitogen-activated protein kinase 13 Hs.178695	stress response| signal transduction| cell communication| stress response| | | | | | | | | |	G2/M MAPK13 mitogen-activated protein kinase 13 Hs.178695 AA158169 stress response| signal transduction| cell communication| stress response| | | | | | | | | |
IMAGE:815287	AA481621	10902	G2	SMAP thyroid hormone receptor coactivating protein Hs.5464	signal transduction| transcription| signal transduction| | | | | | | | | | |	G2 SMAP thyroid hormone receptor coactivating protein Hs.5464 AA481621 signal transduction| transcription| signal transduction| | | | | | | | | | |
IMAGE:268778	N36599	5573	M/G1	PRKAR1A protein kinase, cAMP-dependent, regulatory, type I, alpha (tissue specific extinguisher 1) Hs.183037	signal transduction| transcription| | | | | | | | | | | |	M/G1 PRKAR1A protein kinase, cAMP-dependent, regulatory, type I, alpha (tissue specific extinguisher 1) Hs.183037 N36599 signal transduction| transcription| | | | | | | | | | | |
IMAGE:840636	AA487823	6722	G2/M	SRF serum response factor (c-fos serum response element-binding transcription factor) Hs.155321	signal transduction| transcription| | | | | | | | | | | |	G2/M SRF serum response factor (c-fos serum response element-binding transcription factor) Hs.155321 AA487823 signal transduction| transcription| | | | | | | | | | | |
IMAGE:712840	AA282023	6777	G2	STAT5B signal transducer and activator of transcription 5B Hs.244613	signal transduction| transcription| | | | | | | | | | | |	G2 STAT5B signal transducer and activator of transcription 5B Hs.244613 AA282023 signal transduction| transcription| | | | | | | | | | | |
IMAGE:840600	AA488027	2782	M/G1	GNB1 guanine nucleotide binding protein (G protein), beta polypeptide 1 Hs.215595	signal transduction| signal transduction| signal transduction| | | | | | | | | | |	M/G1 GNB1 guanine nucleotide binding protein (G protein), beta polypeptide 1 Hs.215595 AA488027 signal transduction| signal transduction| signal transduction| | | | | | | | | | |
IMAGE:2017403	AI369623	5998	G2	RGS3 regulator of G-protein signalling 3 Hs.82294	signal transduction| signal transduction| | | | | | | | | | | |	G2 RGS3 regulator of G-protein signalling 3 Hs.82294 AI369623 signal transduction| signal transduction| | | | | | | | | | | |
IMAGE:1475842	AA872143	6093	G2	ROCK1 Rho-associated, coiled-coil containing protein kinase 1 Hs.17820	signal transduction| protein modification| metabolism| signal transduction| cell shape and cell size control| obsolete| | | | | | | |	G2 ROCK1 Rho-associated, coiled-coil containing protein kinase 1 Hs.17820 AA872143 signal transduction| protein modification| metabolism| signal transduction| cell shape and cell size control| obsolete| | | | | | | |
IMAGE:782712	AA447971	10746	S phase	MAP3K2 mitogen-activated protein kinase kinase kinase 2 Hs.28827	signal transduction| protein modification| metabolism| signal transduction| | | | | | | | | |	S phase MAP3K2 mitogen-activated protein kinase kinase kinase 2 Hs.28827 AA447971 signal transduction| protein modification| metabolism| signal transduction| | | | | | | | | |
IMAGE:773220	AA425229	8473	S phase	OGT O-linked N-acetylglucosamine (GlcNAc) transferase (UDP-N-acetylglucosamine:polypeptide-N-acetylglucosaminyl transferase) Hs.100293	signal transduction| protein metabolism and modification| protein modification| metabolism| physiological processes| | | | | | | | |	S phase OGT O-linked N-acetylglucosamine (GlcNAc) transferase (UDP-N-acetylglucosamine:polypeptide-N-acetylglucosaminyl transferase) Hs.100293 AA425229 signal transduction| protein metabolism and modification| protein modification| metabolism| physiological processes| | | | | | | | |
IMAGE:28012	R40794	8473	S phase	OGT O-linked N-acetylglucosamine (GlcNAc) transferase (UDP-N-acetylglucosamine:polypeptide-N-acetylglucosaminyl transferase) Hs.100293	signal transduction| protein metabolism and modification| protein modification| metabolism| physiological processes| | | | | | | | |	S phase OGT O-linked N-acetylglucosamine (GlcNAc) transferase (UDP-N-acetylglucosamine:polypeptide-N-acetylglucosaminyl transferase) Hs.100293 R40794 signal transduction| protein metabolism and modification| protein modification| metabolism| physiological processes| | | | | | | | |
IMAGE:471725	AA035450	3708	G2/M	ITPR1 inositol 1,4,5-triphosphate receptor, type 1 Hs.198443	signal transduction| obsolete| | | | | | | | | | | |	G2/M ITPR1 inositol 1,4,5-triphosphate receptor, type 1 Hs.198443 AA035450 signal transduction| obsolete| | | | | | | | | | | |
IMAGE:1455463	AA865667	3710	G2	ITPR3 inositol 1,4,5-triphosphate receptor, type 3 Hs.77515	signal transduction| obsolete| | | | | | | | | | | |	G2 ITPR3 inositol 1,4,5-triphosphate receptor, type 3 Hs.77515 AA865667 signal transduction| obsolete| | | | | | | | | | | |
IMAGE:45138	H07899	7424	M/G1	VEGFC vascular endothelial growth factor C Hs.79141	signal transduction| developmental processes| cell motility| cell proliferation| | | | | | | | | |	M/G1 VEGFC vascular endothelial growth factor C Hs.79141 H07899 signal transduction| developmental processes| cell motility| cell proliferation| | | | | | | | | |
IMAGE:26249	R20729	6456	S phase	SH3GL2 SH3-domain GRB2-like 2 Hs.75149	signal transduction| developmental processes| | | | | | | | | | | |	S phase SH3GL2 SH3-domain GRB2-like 2 Hs.75149 R20729 signal transduction| developmental processes| | | | | | | | | | | |
IMAGE:788832	AA450062	9518	M/G1	PLAB prostate differentiation factor Hs.296638	signal transduction| cell-cell signaling| cell communication| signal transduction| | | | | | | | | |	M/G1 PLAB prostate differentiation factor Hs.296638 AA450062 signal transduction| cell-cell signaling| cell communication| signal transduction| | | | | | | | | |
IMAGE:2306697	NM_021077	4828	G2	NMB neuromedin B Hs.83321 AI650675	signal transduction| cell-cell signaling| | | | | | | | | | | |	G2 NMB neuromedin B Hs.83321 AI650675 NM_021077 signal transduction| cell-cell signaling| | | | | | | | | | | |
IMAGE:545503	AA079495	6772	G2	STAT1 signal transducer and activator of transcription 1, 91kD Hs.21486	signal transduction| cell death| cell cycle control| signal transduction| signal transduction| signal transduction| stress response| transcription| signal transduction| protein modification| metabolism| signal transduction| |	G2 STAT1 signal transducer and activator of transcription 1, 91kD Hs.21486 AA079495 signal transduction| cell death| cell cycle control| signal transduction| signal transduction| signal transduction| stress response| transcription| signal transduction| protein modification| metabolism| signal transduction| |
IMAGE:194061	H50582	9994	G1/S	CASP8AP2 CASP8 associated protein 2 Hs.122843	signal transduction| cell death| | | | | | | | | | | |	G1/S CASP8AP2 CASP8 associated protein 2 Hs.122843 H50582 signal transduction| cell death| | | | | | | | | | | |
IMAGE:756596	NM_001394	1846	G2/M	DUSP4 dual specificity phosphatase 4 Hs.2359 AA444049	signal transduction| cell cycle control| protein modification| metabolism| | | | | | | | | |	G2/M DUSP4 dual specificity phosphatase 4 Hs.2359 AA444049 NM_001394 signal transduction| cell cycle control| protein modification| metabolism| | | | | | | | | |
IMAGE:271198	N30428	2908	G2	NR3C1 nuclear receptor subfamily 3, group C, member 1 Hs.75772	signal transduction| cell communication| stress response| transcription| transcription| | | | | | | | |	G2 NR3C1 nuclear receptor subfamily 3, group C, member 1 Hs.75772 N30428 signal transduction| cell communication| stress response| transcription| transcription| | | | | | | | |
IMAGE:448190	AA702174	329	G2/M	BIRC2 baculoviral IAP repeat-containing 2 Hs.289107	signal transduction| | | | | | | | | | | | |	G2/M BIRC2 baculoviral IAP repeat-containing 2 Hs.289107 AA702174 signal transduction| | | | | | | | | | | | |
IMAGE:1475200	AA858390	828	S phase	CAPS calcyphosine Hs.26685	signal transduction| | | | | | | | | | | | |	S phase CAPS calcyphosine Hs.26685 AA858390 signal transduction| | | | | | | | | | | | |
IMAGE:46862	H10809	11113	G2/M	CIT citron (rho-interacting, serine/threonine kinase 21) Hs.15767	signal transduction| | | | | | | | | | | | |	G2/M CIT citron (rho-interacting, serine/threonine kinase 21) Hs.15767 H10809 signal transduction| | | | | | | | | | | | |
IMAGE:343562	W69425	11113	G2/M	CIT citron (rho-interacting, serine/threonine kinase 21) Hs.15767	signal transduction| | | | | | | | | | | | |	G2/M CIT citron (rho-interacting, serine/threonine kinase 21) Hs.15767 W69425 signal transduction| | | | | | | | | | | | |
IMAGE:788645	AA449834	10146	M/G1	G3BP Ras-GTPase-activating protein SH3-domain-binding protein Hs.220689	signal transduction| | | | | | | | | | | | |	M/G1 G3BP Ras-GTPase-activating protein SH3-domain-binding protein Hs.220689 AA449834 signal transduction| | | | | | | | | | | | |
IMAGE:898235	AA598628	10146	M/G1	G3BP Ras-GTPase-activating protein SH3-domain-binding protein Hs.220689	signal transduction| | | | | | | | | | | | |	M/G1 G3BP Ras-GTPase-activating protein SH3-domain-binding protein Hs.220689 AA598628 signal transduction| | | | | | | | | | | | |
IMAGE:724932	AA291284	2870	G2/M	GPRK6 G protein-coupled receptor kinase 6 Hs.76297	signal transduction| | | | | | | | | | | | |	G2/M GPRK6 G protein-coupled receptor kinase 6 Hs.76297 AA291284 signal transduction| | | | | | | | | | | | |
1343768	AA725641	10238	G2	HAN11 WD-repeat protein Hs.176600	signal transduction| | | | | | | | | | | | |	G2 HAN11 WD-repeat protein Hs.176600 AA725641 signal transduction| | | | | | | | | | | | |
IMAGE:415264	W92011	29899	G2/M	HSU54999 LGN protein Hs.278338	signal transduction| | | | | | | | | | | | |	G2/M HSU54999 LGN protein Hs.278338 W92011 signal transduction| | | | | | | | | | | | |
IMAGE:1619759	AA991855	5905	G2/M	RANGAP1 Ran GTPase activating protein 1 Hs.183800	signal transduction| | | | | | | | | | | | |	G2/M RANGAP1 Ran GTPase activating protein 1 Hs.183800 AA991855 signal transduction| | | | | | | | | | | | |
IMAGE:811150	AA486455	5905	G2	RANGAP1 Ran GTPase activating protein 1 Hs.183800	signal transduction| | | | | | | | | | | | |	G2 RANGAP1 Ran GTPase activating protein 1 Hs.183800 AA486455 signal transduction| | | | | | | | | | | | |
IMAGE:260931	H98072	5905	G2	RANGAP1 Ran GTPase activating protein 1 Hs.183800	signal transduction| | | | | | | | | | | | |	G2 RANGAP1 Ran GTPase activating protein 1 Hs.183800 H98072 signal transduction| | | | | | | | | | | | |
IMAGE:756401	AA482117	6009	M/G1	RHEB2 Ras homolog enriched in brain 2 Hs.279903	signal transduction| | | | | | | | | | | | |	M/G1 RHEB2 Ras homolog enriched in brain 2 Hs.279903 AA482117 signal transduction| | | | | | | | | | | | |
IMAGE:789376	AA453335	7296	G2/M	TXNRD1 thioredoxin reductase 1 Hs.13046	signal transduction| | | | | | | | | | | | |	G2/M TXNRD1 thioredoxin reductase 1 Hs.13046 AA453335 signal transduction| | | | | | | | | | | | |
IMAGE:292996	N69107	7533	G2/M	YWHAH tyrosine 3-monooxygenase/tryptophan 5-monooxygenase activation protein, eta polypeptide Hs.75544	signal transduction| | | | | | | | | | | | |	G2/M YWHAH tyrosine 3-monooxygenase/tryptophan 5-monooxygenase activation protein, eta polypeptide Hs.75544 N69107 signal transduction| | | | | | | | | | | | |
IMAGE:897594	AA496879	10921	G2/M	RNPS1 RNA-binding protein S1, serine-rich domain Hs.75104	RNA metabolism| transcription| | | | | | | | | | | |	G2/M RNPS1 RNA-binding protein S1, serine-rich domain Hs.75104 AA496879 RNA metabolism| transcription| | | | | | | | | | | |
IMAGE:626531	AA186327	10492	M/G1	NSAP1 NS1-associated protein 1 Hs.155489	RNA metabolism| RNA metabolism| transport| | | | | | | | | | |	M/G1 NSAP1 NS1-associated protein 1 Hs.155489 AA186327 RNA metabolism| RNA metabolism| transport| | | | | | | | | | |
IMAGE:814119	AA465460	1659	G2	DDX8 DEAD/H (Asp-Glu-Ala-Asp/His) box polypeptide 8 (RNA helicase) Hs.171872	RNA metabolism| RNA metabolism| | | | | | | | | | | |	G2 DDX8 DEAD/H (Asp-Glu-Ala-Asp/His) box polypeptide 8 (RNA helicase) Hs.171872 AA465460 RNA metabolism| RNA metabolism| | | | | | | | | | | |
IMAGE:773254	AA425853	6421	G2/M	SFPQ splicing factor proline/glutamine rich (polypyrimidine tract-binding protein-associated) Hs.180610	RNA metabolism| RNA metabolism| | | | | | | | | | | |	G2/M SFPQ splicing factor proline/glutamine rich (polypyrimidine tract-binding protein-associated) Hs.180610 AA425853 RNA metabolism| RNA metabolism| | | | | | | | | | | |
IMAGE:768049	AA426575	6421	G2/M	SFPQ splicing factor proline/glutamine rich (polypyrimidine tract-binding protein-associated) Hs.180610	RNA metabolism| RNA metabolism| | | | | | | | | | | |	G2/M SFPQ splicing factor proline/glutamine rich (polypyrimidine tract-binding protein-associated) Hs.180610 AA426575 RNA metabolism| RNA metabolism| | | | | | | | | | | |
IMAGE:898265	AA598965	6430	S phase	SFRS5 splicing factor, arginine/serine-rich 5 Hs.166975	RNA metabolism| RNA metabolism| | | | | | | | | | | |	S phase SFRS5 splicing factor, arginine/serine-rich 5 Hs.166975 AA598965 RNA metabolism| RNA metabolism| | | | | | | | | | | |
IMAGE:767976	AA418938	6432	G1/S	SFRS7 splicing factor, arginine/serine-rich 7 (35kD) Hs.184167	RNA metabolism| RNA metabolism| | | | | | | | | | | |	G1/S SFRS7 splicing factor, arginine/serine-rich 7 (35kD) Hs.184167 AA418938 RNA metabolism| RNA metabolism| | | | | | | | | | | |
IMAGE:884718	AA629558	7884	G1/S	SLBP stem-loop (histone) binding protein Hs.75257	RNA metabolism| RNA metabolism| | | | | | | | | | | |	G1/S SLBP stem-loop (histone) binding protein Hs.75257 AA629558 RNA metabolism| RNA metabolism| | | | | | | | | | | |
IMAGE:509943	AA052960	1736	M/G1	DKC1 dyskeratosis congenita 1, dyskerin Hs.4747	RNA metabolism| cell growth and/or maintenance| RNA metabolism| transcription| cell cycle control| cell proliferation| cell communication| cell growth and/or maintenance| | | | | |	M/G1 DKC1 dyskeratosis congenita 1, dyskerin Hs.4747 AA052960 RNA metabolism| cell growth and/or maintenance| RNA metabolism| transcription| cell cycle control| cell proliferation| cell communication| cell growth and/or maintenance| | | | | |
IMAGE:841226	AA487115	10625	G1/S	NS1-BP NS1-binding protein Hs.197298	RNA metabolism| cell communication| stress response| transcription| | | | | | | | | |	G1/S NS1-BP NS1-binding protein Hs.197298 AA487115 RNA metabolism| cell communication| stress response| transcription| | | | | | | | | |
IMAGE:786592	AA452256	9406	G1/S	ZNF265 zinc finger protein 265 Hs.194718	RNA metabolism| | | | | | | | | | | | |	G1/S ZNF265 zinc finger protein 265 Hs.194718 AA452256 RNA metabolism| | | | | | | | | | | | |
IMAGE:293884	N66014	9406	G1/S	ZNF265 zinc finger protein 265 Hs.194718	RNA metabolism| | | | | | | | | | | | |	G1/S ZNF265 zinc finger protein 265 Hs.194718 N66014 RNA metabolism| | | | | | | | | | | | |
IMAGE:815096	AA465196	7323	G2/M	UBE2D3 ubiquitin-conjugating enzyme E2D 3 (homologous to yeast UBC4/5) Hs.118797	protein modification| protein degradation| metabolism| | | | | | | | | | |	G2/M UBE2D3 ubiquitin-conjugating enzyme E2D 3 (homologous to yeast UBC4/5) Hs.118797 AA465196 protein modification| protein degradation| metabolism| | | | | | | | | | |
IMAGE:770901	AA434420	5780	G2/M	PTPN9 protein tyrosine phosphatase, non-receptor type 9 Hs.147663	protein modification| metabolism| | | | | | | | | | | |	G2/M PTPN9 protein tyrosine phosphatase, non-receptor type 9 Hs.147663 AA434420 protein modification| metabolism| | | | | | | | | | | |
IMAGE:301018	W07775	6792	G2	STK9 serine/threonine kinase 9 Hs.50905	protein modification| metabolism| | | | | | | | | | | |	G2 STK9 serine/threonine kinase 9 Hs.50905 W07775 protein modification| metabolism| | | | | | | | | | | |
IMAGE:769921	AA430504	11065	G2	UBE2C ubiquitin-conjugating enzyme E2C Hs.93002	protein modification| cell cycle control| cell proliferation| protein degradation| metabolism| | | | | | | | |	G2 UBE2C ubiquitin-conjugating enzyme E2C Hs.93002 AA430504 protein modification| cell cycle control| cell proliferation| protein degradation| metabolism| | | | | | | | |
IMAGE:146882	R80990	11065	G2	UBE2C ubiquitin-conjugating enzyme E2C Hs.93002	protein modification| cell cycle control| cell proliferation| protein degradation| metabolism| | | | | | | | |	G2 UBE2C ubiquitin-conjugating enzyme E2C Hs.93002 R80990 protein modification| cell cycle control| cell proliferation| protein degradation| metabolism| | | | | | | | |
IMAGE:810600	AA464019	27338	M/G1	E2-EPF ubiquitin carrier protein Hs.174070	protein modification| | | | | | | | | | | | |	M/G1 E2-EPF ubiquitin carrier protein Hs.174070 AA464019 protein modification| | | | | | | | | | | | |
IMAGE:840702	AA488081	22929	G2/M	SPS SELENOPHOSPHATE SYNTHETASE ; Human selenium donor protein Hs.124027	protein modification| | | | | | | | | | | | |	G2/M SPS SELENOPHOSPHATE SYNTHETASE ; Human selenium donor protein Hs.124027 AA488081 protein modification| | | | | | | | | | | | |
IMAGE:840404	AA485653	4247	G2	MGAT2 mannosyl (alpha-1,6-)-glycoprotein beta-1,2-N-acetylglucosaminyltransferase Hs.172195	protein metabolism and modification| protein modification| metabolism| metabolism| | | | | | | | | |	G2 MGAT2 mannosyl (alpha-1,6-)-glycoprotein beta-1,2-N-acetylglucosaminyltransferase Hs.172195 AA485653 protein metabolism and modification| protein modification| metabolism| metabolism| | | | | | | | | |
IMAGE:260741	H97940	10905	S phase	MAN1A2 mannosidase, alpha, class 1A, member 2 Hs.239114	protein metabolism and modification| protein modification| metabolism| | | | | | | | | | |	S phase MAN1A2 mannosidase, alpha, class 1A, member 2 Hs.239114 H97940 protein metabolism and modification| protein modification| metabolism| | | | | | | | | | |
IMAGE:130931	R23007	10905	S phase	MAN1A2 mannosidase, alpha, class 1A, member 2 Hs.239114	protein metabolism and modification| protein modification| metabolism| | | | | | | | | | |	S phase MAN1A2 mannosidase, alpha, class 1A, member 2 Hs.239114 R23007 protein metabolism and modification| protein modification| metabolism| | | | | | | | | | |
IMAGE:144893	R78550	10905	S phase	MAN1A2 mannosidase, alpha, class 1A, member 2 Hs.239114	protein metabolism and modification| protein modification| metabolism| | | | | | | | | | |	S phase MAN1A2 mannosidase, alpha, class 1A, member 2 Hs.239114 R78550 protein metabolism and modification| protein modification| metabolism| | | | | | | | | | |
IMAGE:665774	AA193254	1977	M/G1	EIF4E eukaryotic translation initiation factor 4E Hs.79306	protein metabolism and modification| metabolism| | | | | | | | | | | |	M/G1 EIF4E eukaryotic translation initiation factor 4E Hs.79306 AA193254 protein metabolism and modification| metabolism| | | | | | | | | | | |
IMAGE:896930	AA779404	6230	S phase	RPS25 ribosomal protein S25 Hs.113029	protein metabolism and modification| metabolism| | | | | | | | | | | |	S phase RPS25 ribosomal protein S25 Hs.113029 AA779404 protein metabolism and modification| metabolism| | | | | | | | | | | |
IMAGE:122239	T98662	6230	S phase	RPS25 ribosomal protein S25 Hs.113029	protein metabolism and modification| metabolism| | | | | | | | | | | |	S phase RPS25 ribosomal protein S25 Hs.113029 T98662 protein metabolism and modification| metabolism| | | | | | | | | | | |
IMAGE:295729	N72715	10247	G2	UK114 translational inhibitor protein p14.5 Hs.18426	protein metabolism and modification| metabolism| | | | | | | | | | | |	G2 UK114 translational inhibitor protein p14.5 Hs.18426 N72715 protein metabolism and modification| metabolism| | | | | | | | | | | |
IMAGE:450711	AA704459	10036	G1/S	CHAF1A chromatin assembly factor 1, subunit A (p150) Hs.79018	protein metabolism and modification| DNA packaging| | | | | | | | | | | |	G1/S CHAF1A chromatin assembly factor 1, subunit A (p150) Hs.79018 AA704459 protein metabolism and modification| DNA packaging| | | | | | | | | | | |
IMAGE:756769	AA425120	8208	G1/S	CHAF1B chromatin assembly factor 1, subunit B (p60) Hs.75238	protein metabolism and modification| DNA packaging| | | | | | | | | | | |	G1/S CHAF1B chromatin assembly factor 1, subunit B (p60) Hs.75238 AA425120 protein metabolism and modification| DNA packaging| | | | | | | | | | | |
IMAGE:773479	BC008791	2280	G2	TUBB tubulin, beta polypeptide Hs.179661 AA427899	protein folding| | | | | | | | | | | | |	G2 TUBB tubulin, beta polypeptide Hs.179661 AA427899 BC008791 protein folding| | | | | | | | | | | | |
IMAGE:191603	H37989	2280	G2	FKBP1A FK506-binding protein 1A (12kD) Hs.179661	protein folding| | | | | | | | | | | | |	G2 FKBP1A FK506-binding protein 1A (12kD) Hs.179661 H37989 protein folding| | | | | | | | | | | | |
IMAGE:878744	AA670215	7251	G2/M	TSG101 tumor susceptibility gene 101 Hs.118910	protein degradation| metabolism| | | | | | | | | | | |	G2/M TSG101 tumor susceptibility gene 101 Hs.118910 AA670215 protein degradation| metabolism| | | | | | | | | | | |
IMAGE:489595	AA099034	7398	S phase	USP1 ubiquitin specific protease 1 Hs.35086	protein degradation| metabolism| | | | | | | | | | | |	S phase USP1 ubiquitin specific protease 1 Hs.35086 AA099034 protein degradation| metabolism| | | | | | | | | | | |
IMAGE:1581685	AA970066	7398	S phase	USP1 ubiquitin specific protease 1 Hs.35086	protein degradation| metabolism| | | | | | | | | | | |	S phase USP1 ubiquitin specific protease 1 Hs.35086 AA970066 protein degradation| metabolism| | | | | | | | | | | |
IMAGE:73596	T55689	7398	S phase	USP1 ubiquitin specific protease 1 Hs.35086	protein degradation| metabolism| | | | | | | | | | | |	S phase USP1 ubiquitin specific protease 1 Hs.35086 T55689 protein degradation| metabolism| | | | | | | | | | | |
IMAGE:155064	R71391	8975	G2/M	USP13 ubiquitin specific protease 13 (isopeptidase T-3) Hs.85482	protein degradation| metabolism| | | | | | | | | | | |	G2/M USP13 ubiquitin specific protease 13 (isopeptidase T-3) Hs.85482 R71391 protein degradation| metabolism| | | | | | | | | | | |
IMAGE:884462	AA629707	1827	G2/M	DSCR1 Down syndrome critical region gene 1 Hs.184222	physiological processes| signal transduction| developmental processes| | | | | | | | | | |	G2/M DSCR1 Down syndrome critical region gene 1 Hs.184222 AA629707 physiological processes| signal transduction| developmental processes| | | | | | | | | | |
IMAGE:377641	AA055992	1443	G2/M	CSH2 chorionic somatomammotropin hormone 2 Hs.334372	physiological processes| signal transduction| cell-cell signaling| | | | | | | | | | |	G2/M CSH2 chorionic somatomammotropin hormone 2 Hs.334372 AA055992 physiological processes| signal transduction| cell-cell signaling| | | | | | | | | | |
IMAGE:461759	AA682386	4973	G2/M	OLR1 oxidised low density lipoprotein (lectin-like) receptor 1 Hs.77729	physiological processes| protein degradation| metabolism| | | | | | | | | | |	G2/M OLR1 oxidised low density lipoprotein (lectin-like) receptor 1 Hs.77729 AA682386 physiological processes| protein degradation| metabolism| | | | | | | | | | |
IMAGE:30170	R42530	836	G2	CASP3 caspase 3, apoptosis-related cysteine protease Hs.74552	physiological processes| cell death| cell death| cell death| | | | | | | | | |	G2 CASP3 caspase 3, apoptosis-related cysteine protease Hs.74552 R42530 physiological processes| cell death| cell death| cell death| | | | | | | | | |
IMAGE:740925	AA478338	3620	G2/M	INDO indoleamine-pyrrole 2,3 dioxygenase Hs.840	physiological processes| cell communication| amino acid and derivative metabolism| metabolism| | | | | | | | | |	G2/M INDO indoleamine-pyrrole 2,3 dioxygenase Hs.840 AA478338 physiological processes| cell communication| amino acid and derivative metabolism| metabolism| | | | | | | | | |
IMAGE:298417	N74131	7033	G2/M	TFF3 trefoil factor 3 (intestinal) Hs.82961	physiological processes| cell communication| | | | | | | | | | | |	G2/M TFF3 trefoil factor 3 (intestinal) Hs.82961 N74131 physiological processes| cell communication| | | | | | | | | | | |
IMAGE:234539	H78234	56995	M/G1	TUSP tubby super-family protein Hs.102237	physiological processes| | | | | | | | | | | | |	M/G1 TUSP tubby super-family protein Hs.102237 H78234 physiological processes| | | | | | | | | | | | |
IMAGE:491544	AA148536	4928	G2/M	NUP98 nucleoporin 98kD Hs.112255	obsolete| transport| transport| metabolism| | | | | | | | | |	G2/M NUP98 nucleoporin 98kD Hs.112255 AA148536 obsolete| transport| transport| metabolism| | | | | | | | | |
IMAGE:147834	NM_006526	7764	S phase	ZNF217 zinc finger protein 217 Hs.155040 R81830	obsolete| transcription| | | | | | | | | | | |	S phase ZNF217 zinc finger protein 217 Hs.155040 R81830 NM_006526 obsolete| transcription| | | | | | | | | | | |
IMAGE:2062329	AI337292	7272	G2/M	TTK TTK protein kinase Hs.169840	obsolete| spindle assembly| cell growth and/or maintenance| cell cycle control| mitotic spindle assembly| nuclear division| cell cycle| cell growth and/or maintenance| mitotic checkpoint| nuclear division| mitotic checkpoint| mitotic checkpoint| cell cycle| cell proliferation	G2/M TTK TTK protein kinase Hs.169840 AI337292 obsolete| spindle assembly| cell growth and/or maintenance| cell cycle control| mitotic spindle assembly| nuclear division| cell cycle| cell growth and/or maintenance| mitotic checkpoint| nuclear division| mitotic checkpoint| mitotic checkpoint| cell cycle| cell proliferation
IMAGE:197520	H51992	8202	M/G1	NCOA3 nuclear receptor coactivator 3 Hs.225977	obsolete| signal transduction| transcription| | | | | | | | | | |	M/G1 NCOA3 nuclear receptor coactivator 3 Hs.225977 H51992 obsolete| signal transduction| transcription| | | | | | | | | | |
IMAGE:42739	R61007	7803	G2/M	PTP4A1 protein tyrosine phosphatase type IVA, member 1 Hs.227777	obsolete| protein modification| metabolism| | | | | | | | | | |	G2/M PTP4A1 protein tyrosine phosphatase type IVA, member 1 Hs.227777 R61007 obsolete| protein modification| metabolism| | | | | | | | | | |
IMAGE:950690	AA608568	890	G2	CCNA2 cyclin A2 Hs.85137	obsolete| mitotic checkpoint| nuclear division| mitotic checkpoint| mitotic checkpoint| cell cycle| cell cycle| | | | | | |	G2 CCNA2 cyclin A2 Hs.85137 AA608568 obsolete| mitotic checkpoint| nuclear division| mitotic checkpoint| mitotic checkpoint| cell cycle| cell cycle| | | | | | |
IMAGE:781089	AA430241	9232	M/G1	PTTG1 pituitary tumor-transforming 1 Hs.252587	obsolete| developmental processes| transcription| | | | | | | | | | |	M/G1 PTTG1 pituitary tumor-transforming 1 Hs.252587 AA430241 obsolete| developmental processes| transcription| | | | | | | | | | |
IMAGE:2018976	AI362866	9232	M/G1	PTTG1 pituitary tumor-transforming 1 Hs.252587	obsolete| developmental processes| transcription| | | | | | | | | | |	M/G1 PTTG1 pituitary tumor-transforming 1 Hs.252587 AI362866 obsolete| developmental processes| transcription| | | | | | | | | | |
IMAGE:137387	R38044	7020	G2	TFAP2A transcription factor AP-2 alpha (activating enhancer-binding protein 2 alpha) Hs.334334	obsolete| developmental processes| signal transduction| developmental processes| transcription| | | | | | | | |	G2 TFAP2A transcription factor AP-2 alpha (activating enhancer-binding protein 2 alpha) Hs.334334 R38044 obsolete| developmental processes| signal transduction| developmental processes| transcription| | | | | | | | |
IMAGE:291057	N72115	1031	G2	CDKN2C cyclin-dependent kinase inhibitor 2C (p18, inhibits CDK4) Hs.4854	obsolete| developmental processes| cell cycle control| cell communication| cell growth and/or maintenance| cell proliferation| | | | | | | |	G2 CDKN2C cyclin-dependent kinase inhibitor 2C (p18, inhibits CDK4) Hs.4854 N72115 obsolete| developmental processes| cell cycle control| cell communication| cell growth and/or maintenance| cell proliferation| | | | | | | |
IMAGE:589484	AA146826	861	G1/S	RUNX1 runt-related transcription factor 1 (acute myeloid leukemia 1; aml1 oncogene) Hs.129914	obsolete| developmental processes| | | | | | | | | | | |	G1/S RUNX1 runt-related transcription factor 1 (acute myeloid leukemia 1; aml1 oncogene) Hs.129914 AA146826 obsolete| developmental processes| | | | | | | | | | | |
IMAGE:754509	AA411642	4233	G2	MET met proto-oncogene (hepatocyte growth factor receptor) Hs.285754	obsolete| cell proliferation| signal transduction| | | | | | | | | | |	G2 MET met proto-oncogene (hepatocyte growth factor receptor) Hs.285754 AA411642 obsolete| cell proliferation| signal transduction| | | | | | | | | | |
IMAGE:781047	AA446462	699	G2/M	BUB1 budding uninhibited by benzimidazoles 1 (yeast homolog) Hs.98658	obsolete| cell proliferation| mitotic checkpoint| nuclear division| mitotic checkpoint| mitotic checkpoint| mitotic checkpoint| nuclear division| mitotic checkpoint| mitotic checkpoint| cell cycle| | |	G2/M BUB1 budding uninhibited by benzimidazoles 1 (yeast homolog) Hs.98658 AA446462 obsolete| cell proliferation| mitotic checkpoint| nuclear division| mitotic checkpoint| mitotic checkpoint| mitotic checkpoint| nuclear division| mitotic checkpoint| mitotic checkpoint| cell cycle| | |
IMAGE:1734450	AI188173	4193	M/G1	MDM2 mouse double minute 2, human homolog of; p53-binding protein Hs.170027	obsolete| cell proliferation| | | | | | | | | | | |	M/G1 MDM2 mouse double minute 2, human homolog of; p53-binding protein Hs.170027 AI188173 obsolete| cell proliferation| | | | | | | | | | | |
IMAGE:230370	H75530	1398	M/G1	CRK v-crk avian sarcoma virus CT10 oncogene homolog Hs.306088	obsolete| cell motility| signal transduction| obsolete| transcription| | | | | | | | |	M/G1 CRK v-crk avian sarcoma virus CT10 oncogene homolog Hs.306088 H75530 obsolete| cell motility| signal transduction| obsolete| transcription| | | | | | | | |
IMAGE:128947	R10284	3161	G2/M	HMMR hyaluronan-mediated motility receptor (RHAMM) Hs.72550	obsolete| cell motility| | | | | | | | | | | |	G2/M HMMR hyaluronan-mediated motility receptor (RHAMM) Hs.72550 R10284 obsolete| cell motility| | | | | | | | | | | |
IMAGE:705064	AA279990	10460	G2/M	TACC3 transforming, acidic coiled-coil containing protein 3 Hs.104019	obsolete| cell growth and/or maintenance| | | | | | | | | | | |	G2/M TACC3 transforming, acidic coiled-coil containing protein 3 Hs.104019 AA279990 obsolete| cell growth and/or maintenance| | | | | | | | | | | |
IMAGE:796694	AA460685	332	G2/M	BIRC5 baculoviral IAP repeat-containing 5 (survivin) Hs.1578	obsolete| cell death| cell cycle| | | | | | | | | | |	G2/M BIRC5 baculoviral IAP repeat-containing 5 (survivin) Hs.1578 AA460685 obsolete| cell death| cell cycle| | | | | | | | | | |
IMAGE:950445	NM_002715	5515	M/G1	PPP2CA protein phosphatase 2 (formerly 2A), catalytic subunit, alpha isoform Hs.91773 AA599092	obsolete| cell cycle control| protein modification| metabolism| | | | | | | | | |	M/G1 PPP2CA protein phosphatase 2 (formerly 2A), catalytic subunit, alpha isoform Hs.91773 AA599092 NM_002715 obsolete| cell cycle control| protein modification| metabolism| | | | | | | | | |
IMAGE:826273	AA520999	9134	G1/S	CCNE2 cyclin E2 Hs.30464	obsolete| cell cycle checkpoint| cell cycle control| cell cycle| | | | | | | | | |	G1/S CCNE2 cyclin E2 Hs.30464 AA520999 obsolete| cell cycle checkpoint| cell cycle control| cell cycle| | | | | | | | | |
IMAGE:773724	AA433944	8772	G2	FADD Fas (TNFRSF6)-associated via death domain Hs.86131	obsolete| cell communication| stress response| signal transduction| cell death| | | | | | | | |	G2 FADD Fas (TNFRSF6)-associated via death domain Hs.86131 AA433944 obsolete| cell communication| stress response| signal transduction| cell death| | | | | | | | |
IMAGE:40303	R52961	6464	S phase	SHC1 SHC (Src homology 2 domain-containing) transforming protein 1 Hs.81972	obsolete| cell communication| signal transduction| cell communication| signal transduction| cell proliferation| | | | | | | |	S phase SHC1 SHC (Src homology 2 domain-containing) transforming protein 1 Hs.81972 R52961 obsolete| cell communication| signal transduction| cell communication| signal transduction| cell proliferation| | | | | | | |
IMAGE:359597	AA010818	4301	G2/M	MLLT4 myeloid/lymphoid or mixed-lineage leukemia (trithorax (Drosophila) homolog); translocated to, 4 Hs.100469	obsolete| cell adhesion| signal transduction| cell-cell signaling| | | | | | | | | |	G2/M MLLT4 myeloid/lymphoid or mixed-lineage leukemia (trithorax (Drosophila) homolog); translocated to, 4 Hs.100469 AA010818 obsolete| cell adhesion| signal transduction| cell-cell signaling| | | | | | | | | |
IMAGE:196387	R91502	1244	S phase	ABCC2 ATP-binding cassette, sub-family C (CFTR/MRP), member 2 Hs.193852	obsolete| | | | | | | | | | | | |	S phase ABCC2 ATP-binding cassette, sub-family C (CFTR/MRP), member 2 Hs.193852 R91502 obsolete| | | | | | | | | | | | |
IMAGE:502351	AA156936	3928	M/G1	LBC lymphoid blast crisis oncogene Hs.301946	obsolete| | | | | | | | | | | | |	M/G1 LBC lymphoid blast crisis oncogene Hs.301946 AA156936 obsolete| | | | | | | | | | | | |
IMAGE:591653	AA160400	3928	M/G1	LBC lymphoid blast crisis oncogene Hs.301946	obsolete| | | | | | | | | | | | |	M/G1 LBC lymphoid blast crisis oncogene Hs.301946 AA160400 obsolete| | | | | | | | | | | | |
IMAGE:759873	AA423944	10234	G2/M	P37NB 37 kDa leucine-rich repeat (LRR) protein Hs.155545	obsolete| | | | | | | | | | | | |	G2/M P37NB 37 kDa leucine-rich repeat (LRR) protein Hs.155545 AA423944 obsolete| | | | | | | | | | | | |
IMAGE:838829	AA481769	10765	M/G1	PLU-1 putative DNA/chromatin binding motif Hs.143323	obsolete| | | | | | | | | | | | |	M/G1 PLU-1 putative DNA/chromatin binding motif Hs.143323 AA481769 obsolete| | | | | | | | | | | | |
IMAGE:785415	AA476625	51763	G2/M	SKIP SKIP for skeletal muscle and kidney enriched inositol phosphatase Hs.178347	obsolete| | | | | | | | | | | | |	G2/M SKIP SKIP for skeletal muscle and kidney enriched inositol phosphatase Hs.178347 AA476625 obsolete| | | | | | | | | | | | |
IMAGE:825013	AA489201	10541	G2/M	SSP29 acidic protein rich in leucines Hs.84264	obsolete| | | | | | | | | | | | |	G2/M SSP29 acidic protein rich in leucines Hs.84264 AA489201 obsolete| | | | | | | | | | | | |
IMAGE:853368	AA663310	7298	S phase	TYMS thymidylate synthetase Hs.82962	nucleotide metabolism| metabolism| nucleobase nucleoside\, nucleotide and nucleic acid metabolism| | | | | | | | | | |	S phase TYMS thymidylate synthetase Hs.82962 AA663310 nucleotide metabolism| metabolism| nucleobase nucleoside\, nucleotide and nucleic acid metabolism| | | | | | | | | | |
IMAGE:768643	AA425630	11163	M/G1	NUDT4 nudix (nucleoside diphosphate linked moiety X)-type motif 4 Hs.92381	nucleotide metabolism| | | | | | | | | | | | |	M/G1 NUDT4 nudix (nucleoside diphosphate linked moiety X)-type motif 4 Hs.92381 AA425630 nucleotide metabolism| | | | | | | | | | | | |
IMAGE:33949	R20005	5635	G2/M	PRPSAP1 phosphoribosyl pyrophosphate synthetase-associated protein 1 Hs.77498	nucleobase nucleoside\, nucleotide and nucleic acid metabolism| | | | | | | | | | | | |	G2/M PRPSAP1 phosphoribosyl pyrophosphate synthetase-associated protein 1 Hs.77498 R20005 nucleobase nucleoside\, nucleotide and nucleic acid metabolism| | | | | | | | | | | | |
IMAGE:266094	N30955	7156	G1/S	TOP3A topoisomerase (DNA) III alpha Hs.91175	nuclear division| nuclear division| DNA recombination| cell growth and/or maintenance| | | | | | | | | |	G1/S TOP3A topoisomerase (DNA) III alpha Hs.91175 N30955 nuclear division| nuclear division| DNA recombination| cell growth and/or maintenance| | | | | | | | | |
IMAGE:2046118	AI372035	8438	S phase	RAD54L RAD54 (S.cerevisiae)-like Hs.66718	nuclear division| DNA repair| DNA recombination| | | | | | | | | | |	S phase RAD54L RAD54 (S.cerevisiae)-like Hs.66718 AI372035 nuclear division| DNA repair| DNA recombination| | | | | | | | | | |
IMAGE:788355	AA453028	10734	S phase	STAG3 stromal antigen 3 Hs.20132	nuclear division| | | | | | | | | | | | |	S phase STAG3 stromal antigen 3 Hs.20132 AA453028 nuclear division| | | | | | | | | | | | |
IMAGE:209066	H63492	8465	G2/M	STK15 serine/threonine kinase 15 Hs.250822	mitosis| nuclear division| cell cycle| obsolete| protein modification| metabolism| | | | | | | |	G2/M STK15 serine/threonine kinase 15 Hs.250822 H63492 mitosis| nuclear division| cell cycle| obsolete| protein modification| metabolism| | | | | | | |
IMAGE:744047	AA629262	5347	G2/M	PLK polo (Drosophia)-like kinase Hs.77597	mitosis| nuclear division| cell cycle| obsolete| cell cycle control| cell proliferation| | | | | | | |	G2/M PLK polo (Drosophia)-like kinase Hs.77597 AA629262 mitosis| nuclear division| cell cycle| obsolete| cell cycle control| cell proliferation| | | | | | | |
IMAGE:825606	AA504719	3832	G2	KNSL1 kinesin-like 1 Hs.8878	mitosis| nuclear division| cell cycle| mitotic spindle assembly| nuclear division| spindle assembly| cell growth and/or maintenance| | | | | | |	G2 KNSL1 kinesin-like 1 Hs.8878 AA504719 mitosis| nuclear division| cell cycle| mitotic spindle assembly| nuclear division| spindle assembly| cell growth and/or maintenance| | | | | | |
IMAGE:814701	AA481076	4085	G2	MAD2L1 MAD2 (mitotic arrest deficient, yeast, homolog)-like 1 Hs.79078	mitosis| nuclear division| cell cycle| mitotic checkpoint| nuclear division| mitotic checkpoint| cell cycle| | | | | | |	G2 MAD2L1 MAD2 (mitotic arrest deficient, yeast, homolog)-like 1 Hs.79078 AA481076 mitosis| nuclear division| cell cycle| mitotic checkpoint| nuclear division| mitotic checkpoint| cell cycle| | | | | | |
IMAGE:727526	AA411850	1062	G2/M	CENPE centromere protein E (312kD) Hs.75573	mitosis| nuclear division| cell cycle| mitosis| nuclear division| cell cycle| nuclear division| cell cycle| DNA replication and chromosome cycle| | | | |	G2/M CENPE centromere protein E (312kD) Hs.75573 AA411850 mitosis| nuclear division| cell cycle| mitosis| nuclear division| cell cycle| nuclear division| cell cycle| DNA replication and chromosome cycle| | | | |
IMAGE:811956	AA456636	5901	M/G1	RAN RAN, member RAS oncogene family Hs.10842	mitosis| nuclear division| cell cycle| DNA metabolism| cell cycle control| signal transduction| nuclear division| spindle assembly| cell cycle| cell growth and/or maintenance| transport| | |	M/G1 RAN RAN, member RAS oncogene family Hs.10842 AA456636 mitosis| nuclear division| cell cycle| DNA metabolism| cell cycle control| signal transduction| nuclear division| spindle assembly| cell cycle| cell growth and/or maintenance| transport| | |
IMAGE:435076	AA701455	1063	G2/M	CENPF centromere protein F (350/400kD, mitosin) Hs.77204	mitosis| nuclear division| cell cycle| control of mitosis| nuclear division| cell cycle control| DNA replication and chromosome cycle| | | | | | |	G2/M CENPF centromere protein F (350/400kD, mitosin) Hs.77204 AA701455 mitosis| nuclear division| cell cycle| control of mitosis| nuclear division| cell cycle control| DNA replication and chromosome cycle| | | | | | |
IMAGE:739511	AA478066	9088	S phase	PKMYT1 membrane-associated tyrosine- and threonine-specific cdc2-inhibitory kinase Hs.77783	mitosis| nuclear division| cell cycle| control of mitosis| nuclear division| cell cycle control| cell cycle control| cell cycle| | | | | |	S phase PKMYT1 membrane-associated tyrosine- and threonine-specific cdc2-inhibitory kinase Hs.77783 AA478066 mitosis| nuclear division| cell cycle| control of mitosis| nuclear division| cell cycle control| cell cycle control| cell cycle| | | | | |
IMAGE:345787	W72679	10403	G2	HEC highly expressed in cancer, rich in leucine heptad repeats Hs.58169	mitosis| nuclear division| cell cycle| chromosome segregation| mitosis| nuclear division| | | | | | | |	G2 HEC highly expressed in cancer, rich in leucine heptad repeats Hs.58169 W72679 mitosis| nuclear division| cell cycle| chromosome segregation| mitosis| nuclear division| | | | | | | |
IMAGE:1031922	NM_007044	11104	G2	KATNA1 katanin p60 (ATPase-containing) subunit A 1 Hs.289099 AA609740	mitosis| nuclear division| cell cycle| cell shape and cell size control| | | | | | | | | |	G2 KATNA1 katanin p60 (ATPase-containing) subunit A 1 Hs.289099 AA609740 NM_007044 mitosis| nuclear division| cell cycle| cell shape and cell size control| | | | | | | | | |
IMAGE:742798	AA400450	11004	G2/M	KNSL6 kinesin-like 6 (mitotic centromere-associated kinesin) Hs.69360	mitosis| nuclear division| cell cycle| cell proliferation| obsolete| | | | | | | | |	G2/M KNSL6 kinesin-like 6 (mitotic centromere-associated kinesin) Hs.69360 AA400450 mitosis| nuclear division| cell cycle| cell proliferation| obsolete| | | | | | | | |
IMAGE:191904	H38804	9184	G2	BUB3 BUB3 (budding uninhibited by benzimidazoles 3, yeast) homolog Hs.40323	mitosis| nuclear division| cell cycle| cell proliferation| mitotic checkpoint| nuclear division| mitotic checkpoint| cell cycle| mitotic checkpoint| nuclear division| mitotic checkpoint| mitotic checkpoint| cell cycle|	G2 BUB3 BUB3 (budding uninhibited by benzimidazoles 3, yeast) homolog Hs.40323 H38804 mitosis| nuclear division| cell cycle| cell proliferation| mitotic checkpoint| nuclear division| mitotic checkpoint| cell cycle| mitotic checkpoint| nuclear division| mitotic checkpoint| mitotic checkpoint| cell cycle|
IMAGE:842968	AA488324	701	G2/M	BUB1B budding uninhibited by benzimidazoles 1 (yeast homolog), beta Hs.36708	mitosis| nuclear division| cell cycle| cell proliferation| mitotic checkpoint| nuclear division| mitotic checkpoint| cell cycle| | | | | |	G2/M BUB1B budding uninhibited by benzimidazoles 1 (yeast homolog), beta Hs.36708 AA488324 mitosis| nuclear division| cell cycle| cell proliferation| mitotic checkpoint| nuclear division| mitotic checkpoint| cell cycle| | | | | |
IMAGE:755385	AA410559	8881	G2	CDC16 CDC16 (cell division cycle 16, S. cerevisiae, homolog) Hs.1592	mitosis| nuclear division| cell cycle| cell proliferation| control of mitosis| nuclear division| cell cycle| | | | | | |	G2 CDC16 CDC16 (cell division cycle 16, S. cerevisiae, homolog) Hs.1592 AA410559 mitosis| nuclear division| cell cycle| cell proliferation| control of mitosis| nuclear division| cell cycle| | | | | | |
IMAGE:1540227	AA936183	22974	G2/M	C20orf1 chromosome 20 open reading frame 1 Hs.9329	mitosis| nuclear division| cell cycle| cell proliferation| | | | | | | | | |	G2/M C20orf1 chromosome 20 open reading frame 1 Hs.9329 AA936183 mitosis| nuclear division| cell cycle| cell proliferation| | | | | | | | | |
IMAGE:2308994	AI654707	22974	G2/M	C20orf1 chromosome 20 open reading frame 1 Hs.9329	mitosis| nuclear division| cell cycle| cell proliferation| | | | | | | | | |	G2/M C20orf1 chromosome 20 open reading frame 1 Hs.9329 AI654707 mitosis| nuclear division| cell cycle| cell proliferation| | | | | | | | | |
IMAGE:232837	H73968	22974	G2/M	C20orf1 chromosome 20 open reading frame 1 Hs.9329	mitosis| nuclear division| cell cycle| cell proliferation| | | | | | | | | |	G2/M C20orf1 chromosome 20 open reading frame 1 Hs.9329 H73968 mitosis| nuclear division| cell cycle| cell proliferation| | | | | | | | | |
IMAGE:462926	AA682321	4751	G2/M	NEK2 NIMA (never in mitosis gene a)-related kinase 2 Hs.153704	mitosis| nuclear division| cell cycle| cell cycle control| control of mitosis| nuclear division| cell cycle| | | | | | |	G2/M NEK2 NIMA (never in mitosis gene a)-related kinase 2 Hs.153704 AA682321 mitosis| nuclear division| cell cycle| cell cycle control| control of mitosis| nuclear division| cell cycle| | | | | | |
IMAGE:415089	W93379	4751	G2/M	NEK2 NIMA (never in mitosis gene a)-related kinase 2 Hs.153704	mitosis| nuclear division| cell cycle| cell cycle control| control of mitosis| nuclear division| cell cycle| | | | | | |	G2/M NEK2 NIMA (never in mitosis gene a)-related kinase 2 Hs.153704 W93379 mitosis| nuclear division| cell cycle| cell cycle control| control of mitosis| nuclear division| cell cycle| | | | | | |
IMAGE:786067	AA448659	994	G2/M	CDC25B cell division cycle 25B Hs.153752	mitosis| nuclear division| cell cycle| cell cycle control| cell proliferation| | | | | | | | |	G2/M CDC25B cell division cycle 25B Hs.153752 AA448659 mitosis| nuclear division| cell cycle| cell cycle control| cell proliferation| | | | | | | | |
IMAGE:48398	H14392	994	G2/M	CDC25B cell division cycle 25B Hs.153752	mitosis| nuclear division| cell cycle| cell cycle control| cell proliferation| | | | | | | | |	G2/M CDC25B cell division cycle 25B Hs.153752 H14392 mitosis| nuclear division| cell cycle| cell cycle control| cell proliferation| | | | | | | | |
IMAGE:769942	AA430622	3835	G2	KNSL4 kinesin-like 4 Hs.119324	mitosis| nuclear division| cell cycle| | | | | | | | | | |	G2 KNSL4 kinesin-like 4 Hs.119324 AA430622 mitosis| nuclear division| cell cycle| | | | | | | | | | |
IMAGE:856434	AA630776	8943	G2	AP3D1 adaptor-related protein complex 3, delta 1 subunit Hs.75056	metabolism| transport| transport| | | | | | | | | | |	G2 AP3D1 adaptor-related protein complex 3, delta 1 subunit Hs.75056 AA630776 metabolism| transport| transport| | | | | | | | | | |
IMAGE:429323	AA007395	127	G2/M	ADH4 alcohol dehydrogenase 4 (class II), pi polypeptide Hs.1219	metabolism| metabolism| metabolism| | | | | | | | | | |	G2/M ADH4 alcohol dehydrogenase 4 (class II), pi polypeptide Hs.1219 AA007395 metabolism| metabolism| metabolism| | | | | | | | | | |
IMAGE:415388	W78754	97	G1/S	ACYP1 acylphosphatase 1, erythrocyte (common) type Hs.18573	metabolism| | | | | | | | | | | | |	G1/S ACYP1 acylphosphatase 1, erythrocyte (common) type Hs.18573 W78754 metabolism| | | | | | | | | | | | |
IMAGE:486710	AA044326	8564	M/G1	KMO kynurenine 3-monooxygenase (kynurenine 3-hydroxylase) Hs.107318	metabolism| | | | | | | | | | | | |	M/G1 KMO kynurenine 3-monooxygenase (kynurenine 3-hydroxylase) Hs.107318 AA044326 metabolism| | | | | | | | | | | | |
IMAGE:504461	AA152183	8564	M/G1	KMO kynurenine 3-monooxygenase (kynurenine 3-hydroxylase) Hs.107318	metabolism| | | | | | | | | | | | |	M/G1 KMO kynurenine 3-monooxygenase (kynurenine 3-hydroxylase) Hs.107318 AA152183 metabolism| | | | | | | | | | | | |
IMAGE:896921	AA779401	10873	G2/M	ME3 malic enzyme 3, NADP(+)-dependent, mitochondrial Hs.2838	metabolism| | | | | | | | | | | | |	G2/M ME3 malic enzyme 3, NADP(+)-dependent, mitochondrial Hs.2838 AA779401 metabolism| | | | | | | | | | | | |
IMAGE:789204	AA450205	7095	G1/S	TLOC1 translocation protein 1 Hs.8146	metabolism| | | | | | | | | | | | |	G1/S TLOC1 translocation protein 1 Hs.8146 AA450205 metabolism| | | | | | | | | | | | |
IMAGE:713236	AA282936	9585	G2/M	MPHOSPH1 M-phase phosphoprotein 1 Hs.240	M phase| cell cycle| cell cycle control| | | | | | | | | | |	G2/M MPHOSPH1 M-phase phosphoprotein 1 Hs.240 AA282936 M phase| cell cycle| cell cycle control| | | | | | | | | | |
IMAGE:292964	N91105	9585	G2	MPHOSPH1 M-phase phosphoprotein 1 Hs.240	M phase| cell cycle| cell cycle control| | | | | | | | | | |	G2 MPHOSPH1 M-phase phosphoprotein 1 Hs.240 N91105 M phase| cell cycle| cell cycle control| | | | | | | | | | |
IMAGE:427812	AA001106	3643	G1/S	INSR insulin receptor Hs.89695	energy pathways| signal transduction| metabolism| developmental processes| protein modification| metabolism| | | | | | | |	G1/S INSR insulin receptor Hs.89695 AA001106 energy pathways| signal transduction| metabolism| developmental processes| protein modification| metabolism| | | | | | | |
IMAGE:1841916	AI220203	434	S phase	ASIP agouti (mouse)-signaling protein Hs.37006	energy pathways| signal transduction| cell-cell signaling| | | | | | | | | | |	S phase ASIP agouti (mouse)-signaling protein Hs.37006 AI220203 energy pathways| signal transduction| cell-cell signaling| | | | | | | | | | |
IMAGE:283897	N52605	5504	G2	PPP1R2 protein phosphatase 1, regulatory (inhibitor) subunit 2 Hs.267819	energy pathways| | | | | | | | | | | | |	G2 PPP1R2 protein phosphatase 1, regulatory (inhibitor) subunit 2 Hs.267819 N52605 energy pathways| | | | | | | | | | | | |
IMAGE:207869	H60279	9481	S phase	UCP4 uncoupling protein 4 Hs.40510	energy pathways| | | | | | | | | | | | |	S phase UCP4 uncoupling protein 4 Hs.40510 H60279 energy pathways| | | | | | | | | | | | |
IMAGE:128302	R11526	5763	M/G1	PTMS parathymosin Hs.171814	DNA replication| cell cycle| DNA replication| cell cycle control| developmental processes| cell communication| | | | | | | |	M/G1 PTMS parathymosin Hs.171814 R11526 DNA replication| cell cycle| DNA replication| cell cycle control| developmental processes| cell communication| | | | | | | |
IMAGE:531402	AA075920	4174	G1/S	MCM5 minichromosome maintenance deficient (S. cerevisiae) 5 (cell division cycle 46) Hs.77171	DNA replication| cell cycle| DNA replication| cell cycle control| | | | | | | | | |	G1/S MCM5 minichromosome maintenance deficient (S. cerevisiae) 5 (cell division cycle 46) Hs.77171 AA075920 DNA replication| cell cycle| DNA replication| cell cycle control| | | | | | | | | |
IMAGE:700721	AA285155	4174	G1/S	MCM5 minichromosome maintenance deficient (S. cerevisiae) 5 (cell division cycle 46) Hs.77171	DNA replication| cell cycle| DNA replication| cell cycle control| | | | | | | | | |	G1/S MCM5 minichromosome maintenance deficient (S. cerevisiae) 5 (cell division cycle 46) Hs.77171 AA285155 DNA replication| cell cycle| DNA replication| cell cycle control| | | | | | | | | |
IMAGE:130204	R21530	4173	G1/S	ESTs	DNA replication| cell cycle| DNA replication| | | | | | | | | | |	G1/S ESTs R21530 DNA replication| cell cycle| DNA replication| | | | | | | | | | |
IMAGE:843049	AA485983	4173	G2/M	MCM4 minichromosome maintenance deficient (S. cerevisiae) 4 Hs.154443	DNA replication| cell cycle| DNA replication| | | | | | | | | | |	G2/M MCM4 minichromosome maintenance deficient (S. cerevisiae) 4 Hs.154443 AA485983 DNA replication| cell cycle| DNA replication| | | | | | | | | | |
IMAGE:346257	W74071	4173	G1/S	MCM4 minichromosome maintenance deficient (S. cerevisiae) 4 Hs.154443	DNA replication| cell cycle| DNA replication| | | | | | | | | | |	G1/S MCM4 minichromosome maintenance deficient (S. cerevisiae) 4 Hs.154443 W74071 DNA replication| cell cycle| DNA replication| | | | | | | | | | |
IMAGE:194236	H51719	4998	G1/S	ORC1L origin recognition complex, subunit 1 (yeast homolog)-like Hs.17908	DNA replication| cell cycle| DNA replication| | | | | | | | | | |	G1/S ORC1L origin recognition complex, subunit 1 (yeast homolog)-like Hs.17908 H51719 DNA replication| cell cycle| DNA replication| | | | | | | | | | |
IMAGE:260336	H99257	23595	S phase	ORC3L origin recognition complex, subunit 3 (yeast homolog)-like Hs.74420	DNA replication| cell cycle| DNA replication| | | | | | | | | | |	S phase ORC3L origin recognition complex, subunit 3 (yeast homolog)-like Hs.74420 H99257 DNA replication| cell cycle| DNA replication| | | | | | | | | | |
IMAGE:825265	AA504204	10714	G1/S	POLD3 polymerase (DNA directed), delta 3 Hs.82502	DNA replication| cell cycle| DNA replication| | | | | | | | | | |	G1/S POLD3 polymerase (DNA directed), delta 3 Hs.82502 AA504204 DNA replication| cell cycle| DNA replication| | | | | | | | | | |
IMAGE:1636288	AI017254	10714	G1/S	POLD3 polymerase (DNA directed), delta 3 Hs.82502	DNA replication| cell cycle| DNA replication| | | | | | | | | | |	G1/S POLD3 polymerase (DNA directed), delta 3 Hs.82502 AI017254 DNA replication| cell cycle| DNA replication| | | | | | | | | | |
IMAGE:365641	AA025937	5557	S phase	PRIM1 primase, polypeptide 1 (49kD) Hs.82741	DNA replication| cell cycle| DNA replication| | | | | | | | | | |	S phase PRIM1 primase, polypeptide 1 (49kD) Hs.82741 AA025937 DNA replication| cell cycle| DNA replication| | | | | | | | | | |
IMAGE:770880	AA434502	5558	S phase	PRIM2A primase, polypeptide 2A (58kD) Hs.74519	DNA replication| cell cycle| DNA replication| | | | | | | | | | |	S phase PRIM2A primase, polypeptide 2A (58kD) Hs.74519 AA434502 DNA replication| cell cycle| DNA replication| | | | | | | | | | |
IMAGE:42325	R61073	5558	S phase	PRIM2A primase, polypeptide 2A (58kD) Hs.74519	DNA replication| cell cycle| DNA replication| | | | | | | | | | |	S phase PRIM2A primase, polypeptide 2A (58kD) Hs.74519 R61073 DNA replication| cell cycle| DNA replication| | | | | | | | | | |
IMAGE:309288	W40404	5984	S phase	RFC4 replication factor C (activator 1) 4 (37kD) Hs.35120	DNA replication| cell cycle| DNA replication| | | | | | | | | | |	S phase RFC4 replication factor C (activator 1) 4 (37kD) Hs.35120 W40404 DNA replication| cell cycle| DNA replication| | | | | | | | | | |
IMAGE:26616	R13557	6118	S phase	RPA2 replication protein A2 (32kD) Hs.79411	DNA replication| cell cycle| DNA replication| | | | | | | | | | |	S phase RPA2 replication protein A2 (32kD) Hs.79411 R13557 DNA replication| cell cycle| DNA replication| | | | | | | | | | |
IMAGE:204214	H59203	990	G1/S	CDC6 CDC6 (cell division cycle 6, S. cerevisiae) homolog Hs.69563	DNA replication checkpoint| DNA replication| cell cycle| DNA replication| cell cycle control| cell cycle| cell cycle| cell proliferation| | | | | |	G1/S CDC6 CDC6 (cell division cycle 6, S. cerevisiae) homolog Hs.69563 H59203 DNA replication checkpoint| DNA replication| cell cycle| DNA replication| cell cycle control| cell cycle| cell cycle| cell proliferation| | | | | |
IMAGE:453107	AA700904	8318	S phase	CDC45L CDC45 (cell division cycle 45, S.cerevisiae, homolog)-like Hs.114311	DNA replication checkpoint| DNA replication| cell cycle| DNA replication| | | | | | | | | |	S phase CDC45L CDC45 (cell division cycle 45, S.cerevisiae, homolog)-like Hs.114311 AA700904 DNA replication checkpoint| DNA replication| cell cycle| DNA replication| | | | | | | | | |
IMAGE:788256	AA454098	9493	G2	KNSL5 kinesin-like 5 (mitotic kinesin-like protein 1) Hs.270845	DNA replication and chromosome cycle| mitotic spindle assembly| nuclear division| spindle assembly| cell cycle| cell growth and/or maintenance| | | | | | | |	G2 KNSL5 kinesin-like 5 (mitotic kinesin-like protein 1) Hs.270845 AA454098 DNA replication and chromosome cycle| mitotic spindle assembly| nuclear division| spindle assembly| cell cycle| cell growth and/or maintenance| | | | | | | |
IMAGE:845419	AA644129	2175	S phase	FANCA Fanconi anemia, complementation group A Hs.284153	DNA repair| protein metabolism and modification| | | | | | | | | | | |	S phase FANCA Fanconi anemia, complementation group A Hs.284153 AA644129 DNA repair| protein metabolism and modification| | | | | | | | | | | |
IMAGE:630013	AA219061	4436	G1/S	MSH2 mutS (E. coli) homolog 2 (colon cancer, nonpolyposis type 1) Hs.78934	DNA repair| obsolete| DNA repair| | | | | | | | | | |	G1/S MSH2 mutS (E. coli) homolog 2 (colon cancer, nonpolyposis type 1) Hs.78934 AA219061 DNA repair| obsolete| DNA repair| | | | | | | | | | |
IMAGE:220658	H87851	4436	G1/S	MSH2 mutS (E. coli) homolog 2 (colon cancer, nonpolyposis type 1) Hs.78934	DNA repair| obsolete| DNA repair| | | | | | | | | | |	G1/S MSH2 mutS (E. coli) homolog 2 (colon cancer, nonpolyposis type 1) Hs.78934 H87851 DNA repair| obsolete| DNA repair| | | | | | | | | | |
IMAGE:1839367	AI214426	10635	S phase	PIR51 RAD51-interacting protein Hs.24596	DNA repair| nuclear division| DNA recombination| | | | | | | | | | |	S phase PIR51 RAD51-interacting protein Hs.24596 AI214426 DNA repair| nuclear division| DNA recombination| | | | | | | | | | |
IMAGE:789182	AA450264	5111	G1/S	PCNA proliferating cell nuclear antigen Hs.78996	DNA repair| DNA replication| cell cycle| DNA replication| cell proliferation| cell cycle control| | | | | | | |	G1/S PCNA proliferating cell nuclear antigen Hs.78996 AA450264 DNA repair| DNA replication| cell cycle| DNA replication| cell proliferation| cell cycle control| | | | | | | |
IMAGE:43229	H13004	5111	G1/S	PCNA proliferating cell nuclear antigen Hs.78996	DNA repair| DNA replication| cell cycle| DNA replication| cell proliferation| cell cycle control| | | | | | | |	G1/S PCNA proliferating cell nuclear antigen Hs.78996 H13004 DNA repair| DNA replication| cell cycle| DNA replication| cell proliferation| cell cycle control| | | | | | | |
IMAGE:447208	AA703000	9156	S phase	EXO1 exonuclease 1 Hs.47504	DNA repair| DNA repair| DNA recombination| | | | | | | | | | |	S phase EXO1 exonuclease 1 Hs.47504 AA703000 DNA repair| DNA repair| DNA recombination| | | | | | | | | | |
IMAGE:49464	H15112	7374	G1/S	UNG uracil-DNA glycosylase Hs.78853	DNA repair| DNA repair| | | | | | | | | | | |	G1/S UNG uracil-DNA glycosylase Hs.78853 H15112 DNA repair| DNA repair| | | | | | | | | | | |
IMAGE:1476053	AA873056	5888	S phase	RAD51 RAD51 (S. cerevisiae) homolog (E coli RecA homolog) Hs.343807	DNA repair| DNA recombination| nuclear division| DNA recombination| DNA recombination| | | | | | | | |	S phase RAD51 RAD51 (S. cerevisiae) homolog (E coli RecA homolog) Hs.343807 AA873056 DNA repair| DNA recombination| nuclear division| DNA recombination| DNA recombination| | | | | | | | |
IMAGE:26997	R37145	5889	G2/M	RAD51C RAD51 (S. cerevisiae) homolog C Hs.11393	DNA repair| DNA recombination| | | | | | | | | | | |	G2/M RAD51C RAD51 (S. cerevisiae) homolog C Hs.11393 R37145 DNA repair| DNA recombination| | | | | | | | | | | |
IMAGE:241474	H90415	672	S phase	BRCA1 breast cancer 1, early onset Hs.194143	DNA repair| DNA damage response| cell communication| DNA repair| transcription| | | | | | | | |	S phase BRCA1 breast cancer 1, early onset Hs.194143 H90415 DNA repair| DNA damage response| cell communication| DNA repair| transcription| | | | | | | | |
IMAGE:951080	AA620446	9401	G1/S	RECQL4 RecQ protein-like 4 Hs.31442	DNA repair| developmental processes| | | | | | | | | | | |	G1/S RECQL4 RecQ protein-like 4 Hs.31442 AA620446 DNA repair| developmental processes| | | | | | | | | | | |
IMAGE:770424	AA427484	2189	G1/S	FANCG Fanconi anemia, complementation group G Hs.8047	DNA repair| cell cycle control| cell cycle checkpoint| | | | | | | | | | |	G1/S FANCG Fanconi anemia, complementation group G Hs.8047 AA427484 DNA repair| cell cycle control| cell cycle checkpoint| | | | | | | | | | |
IMAGE:51737	H24301	5932	S phase	RBBP8 retinoblastoma-binding protein 8 Hs.29287	DNA repair| cell cycle checkpoint| transcription| | | | | | | | | | |	S phase RBBP8 retinoblastoma-binding protein 8 Hs.29287 H24301 DNA repair| cell cycle checkpoint| transcription| | | | | | | | | | |
IMAGE:951142	AA620553	2237	S phase	FEN1 flap structure-specific endonuclease 1 Hs.4756	DNA repair| cell communication| DNA replication| cell cycle| DNA replication| DNA repair| | | | | | | |	S phase FEN1 flap structure-specific endonuclease 1 Hs.4756 AA620553 DNA repair| cell communication| DNA replication| cell cycle| DNA replication| DNA repair| | | | | | | |
IMAGE:359411	AA010492	8930	S phase	MBD4 methyl-CpG binding domain protein 4 Hs.35947	DNA repair| | | | | | | | | | | | |	S phase MBD4 methyl-CpG binding domain protein 4 Hs.35947 AA010492 DNA repair| | | | | | | | | | | | |
IMAGE:1673052	AI057325	10721	G2	POLQ polymerase (DNA directed), theta Hs.241517	DNA repair| | | | | | | | | | | | |	G2 POLQ polymerase (DNA directed), theta Hs.241517 AI057325 DNA repair| | | | | | | | | | | | |
IMAGE:970613	AA683102	5885	M/G1	RAD21 RAD21 (S. pombe) homolog Hs.81848	DNA recombination| nuclear division| DNA recombination| DNA repair| | | | | | | | | |	M/G1 RAD21 RAD21 (S. pombe) homolog Hs.81848 AA683102 DNA recombination| nuclear division| DNA recombination| DNA repair| | | | | | | | | |
IMAGE:795936	AA460927	7247	G2/M	TSN translin Hs.75066	DNA recombination| | | | | | | | | | | | |	G2/M TSN translin Hs.75066 AA460927 DNA recombination| | | | | | | | | | | | |
IMAGE:241736	H91788	6602	G2/M	SMARCD1 SWI/SNF related, matrix associated, actin dependent regulator of chromatin, subfamily d, member 1 Hs.79335	DNA packaging| transcription| | | | | | | | | | | |	G2/M SMARCD1 SWI/SNF related, matrix associated, actin dependent regulator of chromatin, subfamily d, member 1 Hs.79335 H91788 DNA packaging| transcription| | | | | | | | | | | |
IMAGE:845415	AA644128	4678	G1/S	NASP nuclear autoantigenic sperm protein (histone-binding) Hs.243886	DNA packaging| developmental processes| | | | | | | | | | | |	G1/S NASP nuclear autoantigenic sperm protein (histone-binding) Hs.243886 AA644128 DNA packaging| developmental processes| | | | | | | | | | | |
IMAGE:878184	NM_006339	10362	M/G1	HMG20B high-mobility group 20B Hs.32317 AA775743	DNA packaging| | | | | | | | | | | | |	M/G1 HMG20B high-mobility group 20B Hs.32317 AA775743 NM_006339 DNA packaging| | | | | | | | | | | | |
IMAGE:488422	AA044890	10362	G2/M	HMG20B high-mobility group 20B Hs.32317	DNA packaging| | | | | | | | | | | | |	G2/M HMG20B high-mobility group 20B Hs.32317 AA044890 DNA packaging| | | | | | | | | | | | |
IMAGE:200136	R97836	11073	G1/S	TOPBP1 topoisomerase (DNA) II binding protein Hs.91417	DNA metabolism| DNA replication and chromosome cycle| | | | | | | | | | | |	G1/S TOPBP1 topoisomerase (DNA) II binding protein Hs.91417 R97836 DNA metabolism| DNA replication and chromosome cycle| | | | | | | | | | | |
IMAGE:824962	AA489087	3838	G2	KPNA2 karyopherin alpha 2 (RAG cohort 1, importin alpha 1) Hs.159557	DNA metabolism| cell cycle| DNA recombination| transport| metabolism| DNA replication and chromosome cycle| | | | | | | |	G2 KPNA2 karyopherin alpha 2 (RAG cohort 1, importin alpha 1) Hs.159557 AA489087 DNA metabolism| cell cycle| DNA recombination| transport| metabolism| DNA replication and chromosome cycle| | | | | | | |
IMAGE:882510	AA676460	3838	G2	KPNA2 karyopherin alpha 2 (RAG cohort 1, importin alpha 1) Hs.159557	DNA metabolism| cell cycle| DNA recombination| transport| metabolism| DNA replication and chromosome cycle| | | | | | | |	G2 KPNA2 karyopherin alpha 2 (RAG cohort 1, importin alpha 1) Hs.159557 AA676460 DNA metabolism| cell cycle| DNA recombination| transport| metabolism| DNA replication and chromosome cycle| | | | | | | |
IMAGE:1372140	AA974495	1763	S phase	DNA2L DNA2 (DNA replication helicase, yeast, homolog)-like Hs.194665	DNA metabolism| | | | | | | | | | | | |	S phase DNA2L DNA2 (DNA replication helicase, yeast, homolog)-like Hs.194665 AA974495 DNA metabolism| | | | | | | | | | | | |
IMAGE:781018	AA446292	6598	G2/M	SMARCB1 SWI/SNF related, matrix associated, actin dependent regulator of chromatin, subfamily b, member 1 Hs.159971	DNA integration| transcription| | | | | | | | | | | |	G2/M SMARCB1 SWI/SNF related, matrix associated, actin dependent regulator of chromatin, subfamily b, member 1 Hs.159971 AA446292 DNA integration| transcription| | | | | | | | | | | |
IMAGE:194214	R83270	7050	G2/M	TGIF TGFB-induced factor (TALE family homeobox) Hs.90077	developmental processes| transcription| | | | | | | | | | | |	G2/M TGIF TGFB-induced factor (TALE family homeobox) Hs.90077 R83270 developmental processes| transcription| | | | | | | | | | | |
IMAGE:896949	AA779417	3156	M/G1	HMGCR 3-hydroxy-3-methylglutaryl-Coenzyme A reductase Hs.11899	developmental processes| developmental processes| lipid metabolism| lipid metabolism| metabolism| | | | | | | | |	M/G1 HMGCR 3-hydroxy-3-methylglutaryl-Coenzyme A reductase Hs.11899 AA779417 developmental processes| developmental processes| lipid metabolism| lipid metabolism| metabolism| | | | | | | | |
IMAGE:897865	AA598640	4281	G2	MID1 midline 1 (Opitz/BBB syndrome) Hs.27695	developmental processes| developmental processes| cell shape and cell size control| cell growth and/or maintenance| | | | | | | | | |	G2 MID1 midline 1 (Opitz/BBB syndrome) Hs.27695 AA598640 developmental processes| developmental processes| cell shape and cell size control| cell growth and/or maintenance| | | | | | | | | |
IMAGE:1470060	AA865469	7846	G2	TUBA3 Tubulin, alpha, brain-specific Hs.272897	developmental processes| developmental processes| cell shape and cell size control| | | | | | | | | | |	G2 TUBA3 Tubulin, alpha, brain-specific Hs.272897 AA865469 developmental processes| developmental processes| cell shape and cell size control| | | | | | | | | | |
IMAGE:50787	H16833	6715	G2/M	SRD5A1 steroid-5-alpha-reductase, alpha polypeptide 1 (3-oxo-5 alpha-steroid delta 4-dehydrogenase alpha 1) Hs.552	developmental processes| cell-cell signaling| | | | | | | | | | | |	G2/M SRD5A1 steroid-5-alpha-reductase, alpha polypeptide 1 (3-oxo-5 alpha-steroid delta 4-dehydrogenase alpha 1) Hs.552 H16833 developmental processes| cell-cell signaling| | | | | | | | | | | |
IMAGE:853938	AA644679	8655	M/G1	PIN dynein, cytoplasmic, light polypeptide Hs.5120	developmental processes| cell shape and cell size control| metabolism| developmental processes| obsolete| cell-cell signaling| | | | | | | |	M/G1 PIN dynein, cytoplasmic, light polypeptide Hs.5120 AA644679 developmental processes| cell shape and cell size control| metabolism| developmental processes| obsolete| cell-cell signaling| | | | | | | |
IMAGE:240961	H90899	1832	M/G1	DSP desmoplakin (DPI, DPII) Hs.74316	developmental processes| cell shape and cell size control| | | | | | | | | | | |	M/G1 DSP desmoplakin (DPI, DPII) Hs.74316 H90899 developmental processes| cell shape and cell size control| | | | | | | | | | | |
IMAGE:897544	AA496997	4000	G2/M	LMNA lamin A/C Hs.77886	developmental processes| cell shape and cell size control| | | | | | | | | | | |	G2/M LMNA lamin A/C Hs.77886 AA496997 developmental processes| cell shape and cell size control| | | | | | | | | | | |
IMAGE:240766	NM_003254	7076	G2	TIMP1 tissue inhibitor of metalloproteinase 1 (erythroid potentiating activity, collagenase inhibitor) Hs.5831 H80214	developmental processes| cell proliferation| | | | | | | | | | | |	G2 TIMP1 tissue inhibitor of metalloproteinase 1 (erythroid potentiating activity, collagenase inhibitor) Hs.5831 H80214 NM_003254 developmental processes| cell proliferation| | | | | | | | | | | |
IMAGE:785459	AA449289	6525	G2/M	SMTN smoothelin Hs.149098	developmental processes| cell motility| cell shape and cell size control| | | | | | | | | | |	G2/M SMTN smoothelin Hs.149098 AA449289 developmental processes| cell motility| cell shape and cell size control| | | | | | | | | | |
IMAGE:609626	AA180004	3799	G2	KINESIN HEAVY CHAIN	developmental processes| cell growth and/or maintenance| | | | | | | | | | | |	G2 KINESIN HEAVY CHAIN AA180004 developmental processes| cell growth and/or maintenance| | | | | | | | | | | |
IMAGE:845502	AI791165	3799	M/G1	KIF5B kinesin family member 5B Hs.149436	developmental processes| cell growth and/or maintenance| | | | | | | | | | | |	M/G1 KIF5B kinesin family member 5B Hs.149436 AI791165 developmental processes| cell growth and/or maintenance| | | | | | | | | | | |
IMAGE:950890	AA608707	3799	G2/M	KIF5B kinesin family member 5B Hs.149436	developmental processes| cell growth and/or maintenance| | | | | | | | | | | |	G2/M KIF5B kinesin family member 5B Hs.149436 AA608707 developmental processes| cell growth and/or maintenance| | | | | | | | | | | |
IMAGE:488413	AA046690	3799	G2	KIF5B kinesin family member 5B Hs.149436	developmental processes| cell growth and/or maintenance| | | | | | | | | | | |	G2 KIF5B kinesin family member 5B Hs.149436 AA046690 developmental processes| cell growth and/or maintenance| | | | | | | | | | | |
IMAGE:840775	AA486088	10766	M/G1	TOB2 transducer of ERBB2, 2 Hs.4994	developmental processes| cell cycle control| cell proliferation| | | | | | | | | | |	M/G1 TOB2 transducer of ERBB2, 2 Hs.4994 AA486088 developmental processes| cell cycle control| cell proliferation| | | | | | | | | | |
IMAGE:45578	H08016	5608	G1/S	MAP2K6 mitogen-activated protein kinase kinase 6 Hs.118825	developmental processes| cell cycle control| cell communication| cell growth and/or maintenance| signal transduction| DNA damage response| protein modification| metabolism| | | | | |	G1/S MAP2K6 mitogen-activated protein kinase kinase 6 Hs.118825 H08016 developmental processes| cell cycle control| cell communication| cell growth and/or maintenance| signal transduction| DNA damage response| protein modification| metabolism| | | | | |
IMAGE:813586	AA447662	51053	G1/S	LOC51053 geminin Hs.234896	developmental processes| cell cycle control| cell communication| cell growth and/or maintenance| DNA replication| cell cycle| | | | | | | |	G1/S LOC51053 geminin Hs.234896 AA447662 developmental processes| cell cycle control| cell communication| cell growth and/or maintenance| DNA replication| cell cycle| | | | | | | |
IMAGE:193883	H51100	51053	G1/S	LOC51053 geminin Hs.234896	developmental processes| cell cycle control| cell communication| cell growth and/or maintenance| DNA replication| cell cycle| | | | | | | |	G1/S LOC51053 geminin Hs.234896 H51100 developmental processes| cell cycle control| cell communication| cell growth and/or maintenance| DNA replication| cell cycle| | | | | | | |
IMAGE:296476	W00975	8850	S phase	PCAF p300/CBP-associated factor Hs.199061	developmental processes| cell cycle control| cell communication| cell growth and/or maintenance| DNA packaging| protein modification| | | | | | | |	S phase PCAF p300/CBP-associated factor Hs.199061 W00975 developmental processes| cell cycle control| cell communication| cell growth and/or maintenance| DNA packaging| protein modification| | | | | | | |
IMAGE:365826	AA025819	2619	G2	GAS1 growth arrest-specific 1 Hs.65029	developmental processes| cell cycle control| cell communication| cell growth and/or maintenance| cell proliferation| | | | | | | | |	G2 GAS1 growth arrest-specific 1 Hs.65029 AA025819 developmental processes| cell cycle control| cell communication| cell growth and/or maintenance| cell proliferation| | | | | | | | |
IMAGE:700792	AA284072	1033	M/G1	CDKN3 cyclin-dependent kinase inhibitor 3 (CDK2-associated dual specificity phosphatase) Hs.84113	developmental processes| cell cycle control| cell communication| cell growth and/or maintenance| cell cycle| cell cycle control| cell proliferation| | | | | | |	M/G1 CDKN3 cyclin-dependent kinase inhibitor 3 (CDK2-associated dual specificity phosphatase) Hs.84113 AA284072 developmental processes| cell cycle control| cell communication| cell growth and/or maintenance| cell cycle| cell cycle control| cell proliferation| | | | | | |
IMAGE:145503	R77517	1032	G2/M	CDKN2D cyclin-dependent kinase inhibitor 2D (p19, inhibits CDK4) Hs.29656	developmental processes| cell cycle control| cell communication| cell growth and/or maintenance| cell cycle control| cell cycle| | | | | | | |	G2/M CDKN2D cyclin-dependent kinase inhibitor 2D (p19, inhibits CDK4) Hs.29656 R77517 developmental processes| cell cycle control| cell communication| cell growth and/or maintenance| cell cycle control| cell cycle| | | | | | | |
IMAGE:854668	AA630082	1027	G2	CDKN1B cyclin-dependent kinase inhibitor 1B (p27, Kip1) Hs.238990	developmental processes| cell cycle control| cell communication| cell growth and/or maintenance| cell cycle control| cell cycle control| cell proliferation| | | | | | |	G2 CDKN1B cyclin-dependent kinase inhibitor 1B (p27, Kip1) Hs.238990 AA630082 developmental processes| cell cycle control| cell communication| cell growth and/or maintenance| cell cycle control| cell cycle control| cell proliferation| | | | | | |
IMAGE:42271	R60386	10458	G1/S	BAIAP2 BAI1-associated protein 2 Hs.7936	developmental processes| cell communication| signal transduction| | | | | | | | | | |	G1/S BAIAP2 BAI1-associated protein 2 Hs.7936 R60386 developmental processes| cell communication| signal transduction| | | | | | | | | | |
IMAGE:897768	AA598507	1294	S phase	COL7A1 collagen, type VII, alpha 1 (epidermolysis bullosa, dystrophic, dominant and recessive) Hs.1640	developmental processes| | | | | | | | | | | | |	S phase COL7A1 collagen, type VII, alpha 1 (epidermolysis bullosa, dystrophic, dominant and recessive) Hs.1640 AA598507 developmental processes| | | | | | | | | | | | |
IMAGE:223661	H87275	2487	G2/M	FRZB frizzled-related protein Hs.153684	developmental processes| | | | | | | | | | | | |	G2/M FRZB frizzled-related protein Hs.153684 H87275 developmental processes| | | | | | | | | | | | |
IMAGE:878640	AA670197	3149	G2/M	HMG4 high-mobility group (nonhistone chromosomal) protein 4 Hs.19114	developmental processes| | | | | | | | | | | | |	G2/M HMG4 high-mobility group (nonhistone chromosomal) protein 4 Hs.19114 AA670197 developmental processes| | | | | | | | | | | | |
IMAGE:162533	H27986	8543	S phase	LMO4 LIM domain only 4 Hs.3844	developmental processes| | | | | | | | | | | | |	S phase LMO4 LIM domain only 4 Hs.3844 H27986 developmental processes| | | | | | | | | | | | |
IMAGE:214982	H74163	11135	G2/M	MSE55 serum constituent protein Hs.148101	developmental processes| | | | | | | | | | | | |	G2/M MSE55 serum constituent protein Hs.148101 H74163 developmental processes| | | | | | | | | | | | |
IMAGE:587525	AA132766	7737	G1/S	ZNF183 zinc finger protein 183 (RING finger, C3HC4 type) Hs.64794	developmental processes| | | | | | | | | | | | |	G1/S ZNF183 zinc finger protein 183 (RING finger, C3HC4 type) Hs.64794 AA132766 developmental processes| | | | | | | | | | | | |
IMAGE:785707	AA449593	9055	M/G1	PRC1 protein regulator of cytokinesis 1 Hs.344037	cytokinesis| DNA replication and chromosome cycle| mitotic spindle assembly| nuclear division| spindle assembly| cell cycle| | | | | | | |	M/G1 PRC1 protein regulator of cytokinesis 1 Hs.344037 AA449593 cytokinesis| DNA replication and chromosome cycle| mitotic spindle assembly| nuclear division| spindle assembly| cell cycle| | | | | | | |
IMAGE:128711	R12261	54443	G2/M	ANLN anillin (Drosophila Scraps homolog), actin binding protein Hs.62180	control of mitosis| nuclear division| cell cycle control| cell cycle| cytokinesis| | | | | | | | |	G2/M ANLN anillin (Drosophila Scraps homolog), actin binding protein Hs.62180 R12261 control of mitosis| nuclear division| cell cycle control| cell cycle| cytokinesis| | | | | | | | |
IMAGE:129858	R17092	54443	G2	ANLN anillin (Drosophila Scraps homolog), actin binding protein Hs.62180	control of mitosis| nuclear division| cell cycle control| cell cycle| cytokinesis| | | | | | | | |	G2 ANLN anillin (Drosophila Scraps homolog), actin binding protein Hs.62180 R17092 control of mitosis| nuclear division| cell cycle control| cell cycle| cytokinesis| | | | | | | | |
IMAGE:713127	AA283006	10051	G2	SMC4L1 SMC4 (structural maintenance of chromosomes 4, yeast)-like 1 Hs.50758	chromosome segregation| mitosis| nuclear division| cell cycle| chromosome condensation| mitosis| cell cycle| DNA replication and chromosome cycle| cell growth and/or maintenance| | | | |	G2 SMC4L1 SMC4 (structural maintenance of chromosomes 4, yeast)-like 1 Hs.50758 AA283006 chromosome segregation| mitosis| nuclear division| cell cycle| chromosome condensation| mitosis| cell cycle| DNA replication and chromosome cycle| cell growth and/or maintenance| | | | |
IMAGE:786504	AA452095	10051	G2	SMC4L1 SMC4 (structural maintenance of chromosomes 4, yeast)-like 1 Hs.50758	chromosome segregation| mitosis| nuclear division| cell cycle| chromosome condensation| mitosis| cell cycle| DNA replication and chromosome cycle| cell growth and/or maintenance| | | | |	G2 SMC4L1 SMC4 (structural maintenance of chromosomes 4, yeast)-like 1 Hs.50758 AA452095 chromosome segregation| mitosis| nuclear division| cell cycle| chromosome condensation| mitosis| cell cycle| DNA replication and chromosome cycle| cell growth and/or maintenance| | | | |
IMAGE:461770	AA682392	2168	M/G1	FABP1 fatty acid binding protein 1, liver Hs.5241	cell-cell signaling| lipid metabolism| developmental processes| | | | | | | | | | |	M/G1 FABP1 fatty acid binding protein 1, liver Hs.5241 AA682392 cell-cell signaling| lipid metabolism| developmental processes| | | | | | | | | | |
IMAGE:843398	AA489442	650	G2/M	BMP2 bone morphogenetic protein 2 Hs.73853	cell-cell signaling| developmental processes| | | | | | | | | | | |	G2/M BMP2 bone morphogenetic protein 2 Hs.73853 AA489442 cell-cell signaling| developmental processes| | | | | | | | | | | |
IMAGE:163579	H14230	5864	M/G1	RAB3A RAB3A, member RAS oncogene family Hs.27744	cell-cell signaling| | | | | | | | | | | | |	M/G1 RAB3A RAB3A, member RAS oncogene family Hs.27744 H14230 cell-cell signaling| | | | | | | | | | | | |
IMAGE:504469	AA150062	4957	M/G1	ODF2 outer dense fibre of sperm tails 2 Hs.129055	cell shape and cell size control| | | | | | | | | | | | |	M/G1 ODF2 outer dense fibre of sperm tails 2 Hs.129055 AA150062 cell shape and cell size control| | | | | | | | | | | | |
IMAGE:743278	AA400407	4957	G2/M	ODF2 outer dense fibre of sperm tails 2 Hs.129055	cell shape and cell size control| | | | | | | | | | | | |	G2/M ODF2 outer dense fibre of sperm tails 2 Hs.129055 AA400407 cell shape and cell size control| | | | | | | | | | | | |
IMAGE:841203	AA486728	7414	M/G1	VCL vinculin Hs.75350	cell shape and cell size control| | | | | | | | | | | | |	M/G1 VCL vinculin Hs.75350 AA486728 cell shape and cell size control| | | | | | | | | | | | |
IMAGE:366414	AA026429	29128	G1/S	ICBP90 transcription factor Hs.108106	cell proliferation| transcription| | | | | | | | | | | |	G1/S ICBP90 transcription factor Hs.108106 AA026429 cell proliferation| transcription| | | | | | | | | | | |
IMAGE:1550739	AA908902	29128	G1/S	ICBP90 transcription factor Hs.108106	cell proliferation| transcription| | | | | | | | | | | |	G1/S ICBP90 transcription factor Hs.108106 AA908902 cell proliferation| transcription| | | | | | | | | | | |
IMAGE:625584	AA186427	10293	G2	TRIP TRAF interacting protein Hs.21254	cell proliferation| signal transduction| cell death| | | | | | | | | | |	G2 TRIP TRAF interacting protein Hs.21254 AA186427 cell proliferation| signal transduction| cell death| | | | | | | | | | |
IMAGE:472185	AA057170	9510	G1/S	ADAMTS1 a disintegrin-like and metalloprotease (reprolysin type) with thrombospondin type 1 motif, 1 Hs.8230	cell proliferation| signal transduction| | | | | | | | | | | |	G1/S ADAMTS1 a disintegrin-like and metalloprotease (reprolysin type) with thrombospondin type 1 motif, 1 Hs.8230 AA057170 cell proliferation| signal transduction| | | | | | | | | | | |
IMAGE:796181	AA461110	2621	G2/M	GAS6 growth arrest-specific 6 Hs.78501	cell proliferation| signal transduction| | | | | | | | | | | |	G2/M GAS6 growth arrest-specific 6 Hs.78501 AA461110 cell proliferation| signal transduction| | | | | | | | | | | |
IMAGE:281585	N51201	996	G2/M	CDC27 cell division cycle 27 Hs.172405	cell proliferation| mitosis| nuclear division| cell cycle| | | | | | | | | |	G2/M CDC27 cell division cycle 27 Hs.172405 N51201 cell proliferation| mitosis| nuclear division| cell cycle| | | | | | | | | |
IMAGE:109708	T81764	996	G2/M	CDC27 cell division cycle 27 Hs.172405	cell proliferation| mitosis| nuclear division| cell cycle| | | | | | | | | |	G2/M CDC27 cell division cycle 27 Hs.172405 T81764 cell proliferation| mitosis| nuclear division| cell cycle| | | | | | | | | |
IMAGE:415102	W95001	995	G2	CDC25C cell division cycle 25C Hs.656	cell proliferation| control of mitosis| nuclear division| cell cycle control| cell cycle| cell cycle control| | | | | | | |	G2 CDC25C cell division cycle 25C Hs.656 W95001 cell proliferation| control of mitosis| nuclear division| cell cycle control| cell cycle| cell cycle control| | | | | | | |
IMAGE:435470	AA701502	5154	M/G1	PDGFA platelet-derived growth factor alpha polypeptide Hs.37040	cell proliferation| cell-cell signaling| signal transduction| | | | | | | | | | |	M/G1 PDGFA platelet-derived growth factor alpha polypeptide Hs.37040 AA701502 cell proliferation| cell-cell signaling| signal transduction| | | | | | | | | | |
IMAGE:359119	AA010065	1164	G2/M	CKS2 CDC2-Associted protein CKS2 Hs.83758	cell proliferation| cell cycle control| cell cycle| | | | | | | | | | |	G2/M CKS2 CDC28 protein kinase 2 Hs.83758 AA010065 cell proliferation| cell cycle control| cell cycle| | | | | | | | | | |
IMAGE:725454	AA292964	1164	G2/M	CKS2 CDC2-Associted protein CKS2 Hs.83758	cell proliferation| cell cycle control| cell cycle| | | | | | | | | | |	G2/M CKS2 CDC28 protein kinase 2 Hs.83758 AA292964 cell proliferation| cell cycle control| cell cycle| | | | | | | | | | |
IMAGE:452818	AA704809	6491	G2	SIL TAL1 (SCL) interrupting locus Hs.323032	cell proliferation| | | | | | | | | | | | |	G2 SIL TAL1 (SCL) interrupting locus Hs.323032 AA704809 cell proliferation| | | | | | | | | | | | |
IMAGE:784621	AA443316	3265	G1/S	HRAS v-Ha-ras Harvey rat sarcoma viral oncogene homolog Hs.37003	cell motility| cell motility| cell cycle control| signal transduction| developmental processes| cell shape and cell size control| | | | | | | |	G1/S HRAS v-Ha-ras Harvey rat sarcoma viral oncogene homolog Hs.37003 AA443316 cell motility| cell motility| cell cycle control| signal transduction| developmental processes| cell shape and cell size control| | | | | | | |
IMAGE:1561233	AA953842	9547	G2	SCYB14 small inducible cytokine subfamily B (Cys-X-Cys), member 14 (BRAK) Hs.24395	cell motility| cell communication| signal transduction| cell-cell signaling| cell communication| stress response| | | | | | | |	G2 SCYB14 small inducible cytokine subfamily B (Cys-X-Cys), member 14 (BRAK) Hs.24395 AA953842 cell motility| cell communication| signal transduction| cell-cell signaling| cell communication| stress response| | | | | | | |
IMAGE:810452	AA457118	10953	G2/M	TOM34 translocase of outer mitochondrial membrane 34 Hs.76927	cell growth and/or maintenance| metabolism| | | | | | | | | | | |	G2/M TOM34 translocase of outer mitochondrial membrane 34 Hs.76927 AA457118 cell growth and/or maintenance| metabolism| | | | | | | | | | | |
IMAGE:2017415	AI369629	1058	G2/M	CENPA centromere protein A (17kD) Hs.1594	cell growth and/or maintenance| | | | | | | | | | | | |	G2/M CENPA centromere protein A (17kD) Hs.1594 AI369629 cell growth and/or maintenance| | | | | | | | | | | | |
IMAGE:713886	AA284856	1265	G2/M	CNN2 calponin 2 Hs.169718	cell growth and/or maintenance| | | | | | | | | | | | |	G2/M CNN2 calponin 2 Hs.169718 AA284856 cell growth and/or maintenance| | | | | | | | | | | | |
IMAGE:289551	N62761	8087	M/G1	FXR1 fragile X mental retardation, autosomal homolog 1 Hs.82712	cell death| transport| | | | | | | | | | | |	M/G1 FXR1 fragile X mental retardation, autosomal homolog 1 Hs.82712 N62761 cell death| transport| | | | | | | | | | | |
IMAGE:591683	AA147214	1647	G2/M	GADD45A growth arrest and DNA-damage-inducible, alpha Hs.80409	cell death| DNA repair| stress response| developmental processes| cell cycle control| cell communication| cell cycle control| cell cycle control| cell cycle| | | | |	G2/M GADD45A growth arrest and DNA-damage-inducible, alpha Hs.80409 AA147214 cell death| DNA repair| stress response| developmental processes| cell cycle control| cell communication| cell cycle control| cell cycle control| cell cycle| | | | |
IMAGE:727390	AA403083	5663	M/G1	PSEN1 presenilin 1 (Alzheimer disease 3) Hs.3260	cell death| chromosome segregation| cell growth and/or maintenance| | | | | | | | | | |	M/G1 PSEN1 presenilin 1 (Alzheimer disease 3) Hs.3260 AA403083 cell death| chromosome segregation| cell growth and/or maintenance| | | | | | | | | | |
IMAGE:309776	N94588	8837	G2/M	CFLAR CASP8 and FADD-like apoptosis regulator Hs.195175	cell death| cell death| | | | | | | | | | | |	G2/M CFLAR CASP8 and FADD-like apoptosis regulator Hs.195175 N94588 cell death| cell death| | | | | | | | | | | |
IMAGE:813714	AA453850	8837	G2	CFLAR CASP8 and FADD-like apoptosis regulator Hs.195175	cell death| cell death| | | | | | | | | | | |	G2 CFLAR CASP8 and FADD-like apoptosis regulator Hs.195175 AA453850 cell death| cell death| | | | | | | | | | | |
IMAGE:768260	AA424950	1869	G1/S	E2F1 E2F transcription factor 1 Hs.96055	cell death| cell cycle| cell proliferation| transcription| | | | | | | | | |	G1/S E2F1 E2F transcription factor 1 Hs.96055 AA424950 cell death| cell cycle| cell proliferation| transcription| | | | | | | | | |
IMAGE:823664	AA489619	10600	G2/M	USP16 ubiquitin specific protease 16 Hs.99819	cell cycle| protein degradation| metabolism| | | | | | | | | | |	G2/M USP16 ubiquitin specific protease 16 Hs.99819 AA489619 cell cycle| protein degradation| metabolism| | | | | | | | | | |
IMAGE:287749	N62245	8317	S phase	CDC7L1 CDC7 (cell division cycle 7, S. cerevisiae, homolog)-like 1 Hs.28853	cell cycle| DNA replication| cell cycle| DNA replication| cell cycle control| cell cycle| | | | | | | |	S phase CDC7L1 CDC7 (cell division cycle 7, S. cerevisiae, homolog)-like 1 Hs.28853 N62245 cell cycle| DNA replication| cell cycle| DNA replication| cell cycle control| cell cycle| | | | | | | |
IMAGE:809530	AA456466	4171	G1/S	MCM2 minichromosome maintenance deficient (S. cerevisiae) 2 (mitotin) Hs.57101	cell cycle| DNA replication| cell cycle| DNA replication| | | | | | | | | |	G1/S MCM2 minichromosome maintenance deficient (S. cerevisiae) 2 (mitotin) Hs.57101 AA456466 cell cycle| DNA replication| cell cycle| DNA replication| | | | | | | | | |
IMAGE:898062	AA598776	991	G2/M	CDC20 CDC20 (cell division cycle 20, S. cerevisiae, homolog) Hs.82906	cell cycle| cell cycle control| protein degradation| metabolism| | | | | | | | | |	G2/M CDC20 CDC20 (cell division cycle 20, S. cerevisiae, homolog) Hs.82906 AA598776 cell cycle| cell cycle control| protein degradation| metabolism| | | | | | | | | |
IMAGE:741841	AA402879	1663	G1/S	DDX11 DEAD/H (Asp-Glu-Ala-Asp/His) box polypeptide 11 (S.cerevisiae CHL1-like helicase) Hs.27424	cell cycle| cell cycle control| cell cycle| chromosome segregation| mitosis| nuclear division| cell proliferation| | | | | | |	G1/S DDX11 DEAD/H (Asp-Glu-Ala-Asp/His) box polypeptide 11 (S.cerevisiae CHL1-like helicase) Hs.27424 AA402879 cell cycle| cell cycle control| cell cycle| chromosome segregation| mitosis| nuclear division| cell proliferation| | | | | | |
IMAGE:1056214	AA621026	51343	G2	FZR1 Fzr1 protein Hs.268384	cell cycle control| protein degradation| metabolism| | | | | | | | | | |	G2 FZR1 Fzr1 protein Hs.268384 AA621026 cell cycle control| protein degradation| metabolism| | | | | | | | | | |
IMAGE:1456207	AI791356	51343	G2	FZR1 Fzr1 protein Hs.268384	cell cycle control| protein degradation| metabolism| | | | | | | | | | |	G2 FZR1 Fzr1 protein Hs.268384 AI791356 cell cycle control| protein degradation| metabolism| | | | | | | | | | |
IMAGE:809731	AA455509	4335	G1/S	MNT MAX binding protein Hs.25497	cell cycle control| cell proliferation| developmental processes| transcription| cell proliferation| | | | | | | | |	G1/S MNT MAX binding protein Hs.25497 AA455509 cell cycle control| cell proliferation| developmental processes| transcription| cell proliferation| | | | | | | | |
IMAGE:1915416	AI311067	1022	M/G1	CDK7 cyclin-dependent kinase 7 (homolog of Xenopus MO15 cdk-activating kinase) Hs.184298	cell cycle control| cell proliferation| cell cycle control| cell cycle| transcription| | | | | | | | |	M/G1 CDK7 cyclin-dependent kinase 7 (homolog of Xenopus MO15 cdk-activating kinase) Hs.184298 AI311067 cell cycle control| cell proliferation| cell cycle control| cell cycle| transcription| | | | | | | | |
IMAGE:130242	R22624	1022	M/G1	CDK7 cyclin-dependent kinase 7 (homolog of Xenopus MO15 cdk-activating kinase) Hs.184298	cell cycle control| cell proliferation| cell cycle control| cell cycle| transcription| | | | | | | | |	M/G1 CDK7 cyclin-dependent kinase 7 (homolog of Xenopus MO15 cdk-activating kinase) Hs.184298 R22624 cell cycle control| cell proliferation| cell cycle control| cell cycle| transcription| | | | | | | | |
IMAGE:810899	AA459522	1163	G2/M	CKS1 CDC2-Associted protein CKS1 Hs.77550	cell cycle control| cell proliferation| cell cycle control| cell cycle| | | | | | | | | |	G2/M CKS1 CDC28 protein kinase 1 Hs.77550 AA459522 cell cycle control| cell proliferation| cell cycle control| cell cycle| | | | | | | | | |
IMAGE:703633	AA278629	1163	G2	CKS1 CDC2-Associted protein CKS1 Hs.77550	cell cycle control| cell proliferation| cell cycle control| cell cycle| | | | | | | | | |	G2 CKS1 CDC28 protein kinase 1 Hs.77550 AA278629 cell cycle control| cell proliferation| cell cycle control| cell cycle| | | | | | | | | |
IMAGE:281898	N53308	1163	G2	CKS1 CDC2-Associted protein CKS1 Hs.77550	cell cycle control| cell proliferation| cell cycle control| cell cycle| | | | | | | | | |	G2 CKS1 CDC28 protein kinase 1 Hs.77550 N53308 cell cycle control| cell proliferation| cell cycle control| cell cycle| | | | | | | | | |
IMAGE:510228	AA053556	4288	G2/M	MKI67 antigen identified by monoclonal antibody Ki-67 Hs.80976	cell cycle control| cell proliferation| | | | | | | | | | | |	G2/M MKI67 antigen identified by monoclonal antibody Ki-67 Hs.80976 AA053556 cell cycle control| cell proliferation| | | | | | | | | | | |
IMAGE:769513	AA425973	4288	G2/M	MKI67 antigen identified by monoclonal antibody Ki-67 Hs.80976	cell cycle control| cell proliferation| | | | | | | | | | | |	G2/M MKI67 antigen identified by monoclonal antibody Ki-67 Hs.80976 AA425973 cell cycle control| cell proliferation| | | | | | | | | | | |
IMAGE:366057	AA071514	993	G1/S	CDC25A cell division cycle 25A Hs.1634	cell cycle control| cell cycle control| cell cycle| | | | | | | | | | |	G1/S CDC25A cell division cycle 25A Hs.1634 AA071514 cell cycle control| cell cycle control| cell cycle| | | | | | | | | | |
IMAGE:1541659	AA913262	993	G1/S	CDC25A cell division cycle 25A Hs.1634	cell cycle control| cell cycle control| cell cycle| | | | | | | | | | |	G1/S CDC25A cell division cycle 25A Hs.1634 AA913262 cell cycle control| cell cycle control| cell cycle| | | | | | | | | | |
IMAGE:127510	R09063	993	G1/S	CDC25A cell division cycle 25A Hs.1634	cell cycle control| cell cycle control| cell cycle| | | | | | | | | | |	G1/S CDC25A cell division cycle 25A Hs.1634 R09063 cell cycle control| cell cycle control| cell cycle| | | | | | | | | | |
IMAGE:809828	NM_001951	1875	G2/M	E2F5 E2F transcription factor 5, p130-binding Hs.2331 AA455521 E2F-5=pRB-binding transcription factor	cell cycle control| | | | | | | | | | | | |	G2/M E2F5 E2F transcription factor 5, p130-binding Hs.2331 AA455521 E2F-5=pRB-binding transcription factor NM_001951 cell cycle control| | | | | | | | | | | | |
IMAGE:455128	AA676797	899	G2	CCNF cyclin F Hs.1973	cell cycle control| | | | | | | | | | | | |	G2 CCNF cyclin F Hs.1973 AA676797 cell cycle control| | | | | | | | | | | | |
IMAGE:1564300	AA973283	8841	G2	HDAC3 histone deacetylase 3 Hs.279789	cell cycle control| | | | | | | | | | | | |	G2 HDAC3 histone deacetylase 3 Hs.279789 AA973283 cell cycle control| | | | | | | | | | | | |
IMAGE:253009	H88588	8841	G2	HDAC3 histone deacetylase 3 Hs.279789	cell cycle control| | | | | | | | | | | | |	G2 HDAC3 histone deacetylase 3 Hs.279789 H88588 cell cycle control| | | | | | | | | | | | |
IMAGE:307553	N95249	3845	M/G1	KRAS2 v-Ki-ras2 Kirsten rat sarcoma 2 viral oncogene homolog Hs.184050	cell cycle control| | | | | | | | | | | | |	M/G1 KRAS2 v-Ki-ras2 Kirsten rat sarcoma 2 viral oncogene homolog Hs.184050 N95249 cell cycle control| | | | | | | | | | | | |
IMAGE:564803	AA136566	2305	G2/M	FOXM1 forkhead box M1 Hs.239	cell communication| stress response| transcription| | | | | | | | | | |	G2/M FOXM1 forkhead box M1 Hs.239 AA136566 cell communication| stress response| transcription| | | | | | | | | | |
IMAGE:1554727	AA913304	3298	G1/S	HSF2 heat shock transcription factor 2 Hs.158195	cell communication| stress response| transcription| | | | | | | | | | |	G1/S HSF2 heat shock transcription factor 2 Hs.158195 AA913304 cell communication| stress response| transcription| | | | | | | | | | |
IMAGE:666128	AA233663	1675	G2	DF D component of complement (adipsin) Hs.155597	cell communication| stress response| protein degradation| metabolism| | | | | | | | | |	G2 DF D component of complement (adipsin) Hs.155597 AA233663 cell communication| stress response| protein degradation| metabolism| | | | | | | | | |
IMAGE:2151705	AI459915	3110	G1/S	HLXB9 homeo box HB9 Hs.37035	cell communication| stress response| developmental processes| transcription| | | | | | | | | |	G1/S HLXB9 homeo box HB9 Hs.37035 AI459915 cell communication| stress response| developmental processes| transcription| | | | | | | | | |
IMAGE:768496	AA425028	10148	G2	EBI3 Epstein-Barr virus induced gene 3 Hs.185705	cell communication| stress response| cell communication| stress response| | | | | | | | | |	G2 EBI3 Epstein-Barr virus induced gene 3 Hs.185705 AA425028 cell communication| stress response| cell communication| stress response| | | | | | | | | |
IMAGE:204335	NM_013230	934	M/G1	CD24 antigen (small cell lung carcinoma cluster 4 antigen) Hs.286124 H59915	cell communication| stress response| | | | | | | | | | | |	M/G1 CD24 antigen (small cell lung carcinoma cluster 4 antigen) Hs.286124 H59915 NM_013230 cell communication| stress response| | | | | | | | | | | |
IMAGE:868652	AA664406	721	M/G1	C4B complement component 4B Hs.278625	cell communication| stress response| | | | | | | | | | | |	M/G1 C4B complement component 4B Hs.278625 AA664406 cell communication| stress response| | | | | | | | | | | |
IMAGE:730555	AA435948	3337	G2/M	DNAJB1 DnaJ (Hsp40) homolog, subfamily B, member 1 Hs.82646	cell communication| stress response| | | | | | | | | | | |	G2/M DNAJB1 DnaJ (Hsp40) homolog, subfamily B, member 1 Hs.82646 AA435948 cell communication| stress response| | | | | | | | | | | |
IMAGE:810787	AA481758	3337	G2	DNAJB1 DnaJ (Hsp40) homolog, subfamily B, member 1 Hs.82646	cell communication| stress response| | | | | | | | | | | |	G2 DNAJB1 DnaJ (Hsp40) homolog, subfamily B, member 1 Hs.82646 AA481758 cell communication| stress response| | | | | | | | | | | |
IMAGE:132203	R26390	5611	G1/S	DNAJC3 DnaJ (Hsp40) homolog, subfamily C, member 3 Hs.9683	cell communication| protein metabolism and modification| metabolism| | | | | | | | | | |	G1/S DNAJC3 DnaJ (Hsp40) homolog, subfamily C, member 3 Hs.9683 R26390 cell communication| protein metabolism and modification| metabolism| | | | | | | | | | |
IMAGE:841332	AA487634	397	G2/M	ARHGDIB Rho GDP dissociation inhibitor (GDI) beta Hs.83656	cell communication| developmental processes| cell adhesion| signal transduction| obsolete| | | | | | | | |	G2/M ARHGDIB Rho GDP dissociation inhibitor (GDI) beta Hs.83656 AA487634 cell communication| developmental processes| cell adhesion| signal transduction| obsolete| | | | | | | | |
IMAGE:246246	N59396	729	G2/M	C6 complement component 6 Hs.1282	cell communication| cell communication| stress response| cell communication| stress response| | | | | | | | |	G2/M C6 complement component 6 Hs.1282 N59396 cell communication| cell communication| stress response| cell communication| stress response| | | | | | | | |
IMAGE:281145	N50959	314	M/G1	AOC2 amine oxidase, copper containing 2 (retina-specific) Hs.143102	cell communication| amino acid and derivative metabolism| | | | | | | | | | | |	M/G1 AOC2 amine oxidase, copper containing 2 (retina-specific) Hs.143102 N50959 cell communication| amino acid and derivative metabolism| | | | | | | | | | | |
IMAGE:195911	R92717	1122	S phase	CHML choroideremia-like (Rab escort protein 2) Hs.170129	cell communication| | | | | | | | | | | | |	S phase CHML choroideremia-like (Rab escort protein 2) Hs.170129 R92717 cell communication| | | | | | | | | | | | |
IMAGE:839094	AA488737	1411	M/G1	CRYBA1 crystallin, beta A1 Hs.46275	cell communication| | | | | | | | | | | | |	M/G1 CRYBA1 crystallin, beta A1 Hs.46275 AA488737 cell communication| | | | | | | | | | | | |
IMAGE:546600	AA084517	11080	S phase	DNAJB4 DnaJ (Hsp40) homolog, subfamily B, member 4 Hs.41693	cell communication| | | | | | | | | | | | |	S phase DNAJB4 DnaJ (Hsp40) homolog, subfamily B, member 4 Hs.41693 AA084517 cell communication| | | | | | | | | | | | |
IMAGE:432093	AA679293	10068	G2	IL18BP interleukin 18 binding protein Hs.325978	cell communication| | | | | | | | | | | | |	G2 IL18BP interleukin 18 binding protein Hs.325978 AA679293 cell communication| | | | | | | | | | | | |
IMAGE:859478	AA666269	3690	G2	ITGB3 integrin, beta 3 (platelet glycoprotein IIIa, antigen CD61) Hs.87149	cell adhesion| physiological processes| | | | | | | | | | | |	G2 ITGB3 integrin, beta 3 (platelet glycoprotein IIIa, antigen CD61) Hs.87149 AA666269 cell adhesion| physiological processes| | | | | | | | | | | |
IMAGE:130824	R22239	4162	G1/S	MCAM melanoma cell adhesion molecule Hs.211579	cell adhesion| developmental processes| | | | | | | | | | | |	G1/S MCAM melanoma cell adhesion molecule Hs.211579 R22239 cell adhesion| developmental processes| | | | | | | | | | | |
IMAGE:451504	AA707321	5411	G1/S	PNN pinin, desmosome associated protein Hs.44499	cell adhesion| cell shape and cell size control| | | | | | | | | | | |	G1/S PNN pinin, desmosome associated protein Hs.44499 AA707321 cell adhesion| cell shape and cell size control| | | | | | | | | | | |
IMAGE:416316	W86139	5411	G1/S	PNN pinin, desmosome associated protein Hs.44499	cell adhesion| cell shape and cell size control| | | | | | | | | | | |	G1/S PNN pinin, desmosome associated protein Hs.44499 W86139 cell adhesion| cell shape and cell size control| | | | | | | | | | | |
IMAGE:2309141	AI651871	976	G2/M	CD97 CD97 antigen Hs.3107	cell adhesion| cell motility| cell communication| cell-cell signaling| cell communication| stress response| signal transduction| | | | | | |	G2/M CD97 CD97 antigen Hs.3107 AI651871 cell adhesion| cell motility| cell communication| cell-cell signaling| cell communication| stress response| signal transduction| | | | | | |
IMAGE:484535	AA036974	8639	M/G1	AOC3 amine oxidase, copper containing 3 (vascular adhesion protein 1) Hs.198241	cell adhesion| amino acid and derivative metabolism| cell communication| stress response| | | | | | | | | |	M/G1 AOC3 amine oxidase, copper containing 3 (vascular adhesion protein 1) Hs.198241 AA036974 cell adhesion| amino acid and derivative metabolism| cell communication| stress response| | | | | | | | | |
IMAGE:364921	AA024656	1500	G2/M	CTNND1 catenin (cadherin-associated protein), delta 1 Hs.166011	cell adhesion| | | | | | | | | | | | |	G2/M CTNND1 catenin (cadherin-associated protein), delta 1 Hs.166011 AA024656 cell adhesion| | | | | | | | | | | | |
IMAGE:242578	H94949	10024	M/G1	TROAP trophinin associated protein (tastin) Hs.171955	cell adhesion| | | | | | | | | | | | |	M/G1 TROAP trophinin associated protein (tastin) Hs.171955 H94949 cell adhesion| | | | | | | | | | | | |
IMAGE:267431	Z97989	2534	G2/M	FYN FYN oncogene related to SRC, FGR, YES Hs.169370 N22980	behavior| behavior| signal transduction| protein modification| metabolism| | | | | | | | |	G2/M FYN FYN oncogene related to SRC, FGR, YES Hs.169370 N22980 Z97989 behavior| behavior| signal transduction| protein modification| metabolism| | | | | | | | |
IMAGE:271683	N43826	2534	G2/M	FYN FYN oncogene related to SRC, FGR, YES Hs.169370	behavior| behavior| signal transduction| protein modification| metabolism| | | | | | | | |	G2/M FYN FYN oncogene related to SRC, FGR, YES Hs.169370 N43826 behavior| behavior| signal transduction| protein modification| metabolism| | | | | | | | |
IMAGE:143039	R71328	2653	G2/M	GCSH glycine cleavage system protein H (aminomethyl carrier) Hs.77631	amino acid and derivative metabolism| metabolism| | | | | | | | | | | |	G2/M GCSH glycine cleavage system protein H (aminomethyl carrier) Hs.77631 R71328 amino acid and derivative metabolism| metabolism| | | | | | | | | | | |
IMAGE:51702	H22856	2805	G2/M	GOT1 glutamic-oxaloacetic transaminase 1, soluble (aspartate aminotransferase 1) Hs.597	amino acid and derivative metabolism| metabolism| | | | | | | | | | | |	G2/M GOT1 glutamic-oxaloacetic transaminase 1, soluble (aspartate aminotransferase 1) Hs.597 H22856 amino acid and derivative metabolism| metabolism| | | | | | | | | | | |
IMAGE:361639	W96268	2730	S phase	GCLM glutamate-cysteine ligase, modifier subunit Hs.89709	amino acid and derivative metabolism| | | | | | | | | | | | |	S phase GCLM glutamate-cysteine ligase, modifier subunit Hs.89709 W96268 amino acid and derivative metabolism| | | | | | | | | | | | |
IMAGE:1699682	AI061169		M/G1	**EST Hs.133431		M/G1 **EST Hs.133431 AI061169
IMAGE:950916	AA608725		S phase	**ESTs Hs.130741		S phase **ESTs Hs.130741 AA608725
IMAGE:23421	T76946		M/G1	**ESTs Hs.142251		M/G1 **ESTs Hs.142251 T76946
IMAGE:302221	N77828		G1/S	**ESTs Hs.184378		G1/S **ESTs Hs.184378 N77828
IMAGE:288677	N62402		G1/S	**ESTs Hs.233331		G1/S **ESTs Hs.233331 N62402
IMAGE:469898	AA029844		G2	**ESTs Hs.40527		G2 **ESTs Hs.40527 AA029844
IMAGE:268711	N25936		G1/S	**ESTs Hs.43712		G1/S **ESTs Hs.43712 N25936
IMAGE:1604372	AI820593		G2	**ESTs, Moderately similar to ALU1_HUMAN ALU SUBFAMILY J SEQUENCE CONTAMINATION WARNING ENTRY [H.sapiens] Hs.144662		G2 **ESTs, Moderately similar to ALU1_HUMAN ALU SUBFAMILY J SEQUENCE CONTAMINATION WARNING ENTRY [H.sapiens] Hs.144662 AI820593
IMAGE:243135	H95819		G2/M	**ESTs, Weakly similar to 2004399A chromosomal protein [H.sapiens] Hs.221754		G2/M **ESTs, Weakly similar to 2004399A chromosomal protein [H.sapiens] Hs.221754 H95819
IMAGE:197868	R96212		S phase	**ESTs, Weakly similar to ALU1_HUMAN ALU SUBFAMILY J SEQUENCE CONTAMINATION WARNING ENTRY [H.sapiens] Hs.318894		S phase **ESTs, Weakly similar to ALU1_HUMAN ALU SUBFAMILY J SEQUENCE CONTAMINATION WARNING ENTRY [H.sapiens] Hs.318894 R96212
IMAGE:207107	H48508		S phase	**ESTs, Weakly similar to I38022 hypothetical protein [H.sapiens] Hs.128783		S phase **ESTs, Weakly similar to I38022 hypothetical protein [H.sapiens] Hs.128783 H48508
IMAGE:755240	AI734042		S phase	**ESTs, Weakly similar to KIAA0822 protein [H.sapiens] Hs.98368		S phase **ESTs, Weakly similar to KIAA0822 protein [H.sapiens] Hs.98368 AI734042
IMAGE:511091	AA088258		S phase	**ESTs, Weakly similar to protein that is immuno-reactive with anti-PTH polyclonal antibodies [H.sapiens] Hs.301486		S phase **ESTs, Weakly similar to protein that is immuno-reactive with anti-PTH polyclonal antibodies [H.sapiens] Hs.301486 AA088258
IMAGE:362483	AA018591		G2/M	**Homo sapiens cDNA FLJ13700 fis, clone PLACE2000216, highly similar to SPECTRIN BETA CHAIN, BRAIN Hs.324648		G2/M **Homo sapiens cDNA FLJ13700 fis, clone PLACE2000216, highly similar to SPECTRIN BETA CHAIN, BRAIN Hs.324648 AA018591
IMAGE:712505	AA278152		G2	**Homo sapiens cDNA FLJ14365 fis, clone HEMBA1001019 Hs.348383		G2 **Homo sapiens cDNA FLJ14365 fis, clone HEMBA1001019 Hs.348383 AA278152
IMAGE:784178	AA446650		G2/M	**Homo sapiens mRNA; cDNA DKFZp586M0723 (from clone DKFZp586M0723) Hs.27860		G2/M **Homo sapiens mRNA; cDNA DKFZp586M0723 (from clone DKFZp586M0723) Hs.27860 AA446650
IMAGE:181831	H39962		G2/M	**Homo sapiens SNC73 protein (SNC73) mRNA, complete cds Hs.293441		G2/M **Homo sapiens SNC73 protein (SNC73) mRNA, complete cds Hs.293441 H39962
IMAGE:66430	R16074		G2	**Homo sapiens, Similar to ribosomal protein L23a, clone MGC:2597 IMAGE:3346366, mRNA, complete cds Hs.247828		G2 **Homo sapiens, Similar to ribosomal protein L23a, clone MGC:2597 IMAGE:3346366, mRNA, complete cds Hs.247828 R16074
IMAGE:627688	AA197344		G1/S	EST Hs.104123		G1/S EST Hs.104123 AA197344
IMAGE:839579	AA489813		G2/M	EST Hs.105298		G2/M EST Hs.105298 AA489813
IMAGE:877776	AA626786		G2/M	EST Hs.116174		G2/M EST Hs.116174 AA626786
IMAGE:1677546	AI078552		M/G1	EST Hs.135448		M/G1 EST Hs.135448 AI078552
IMAGE:1849013	AI247680		S phase	EST Hs.149260		S phase EST Hs.149260 AI247680
IMAGE:1850351	AI249089		G2	EST Hs.149338		G2 EST Hs.149338 AI249089
IMAGE:1709892	AI138644		M/G1	EST Hs.154621		M/G1 EST Hs.154621 AI138644
IMAGE:740851	AA477708		G2	EST Hs.336706		G2 EST Hs.336706 AA477708
IMAGE:73953	T55197		G1/S	EST, Moderately similar to ALU8_HUMAN ALU SUBFAMILY SX SEQUENCE CONTAMINATION WARNING ENTRY [H.sapiens] Hs.251574		G1/S EST, Moderately similar to ALU8_HUMAN ALU SUBFAMILY SX SEQUENCE CONTAMINATION WARNING ENTRY [H.sapiens] Hs.251574 T55197
IMAGE:1554469	AA931528		G2	EST, Weakly similar to dJ45P21.2 [H.sapiens] Hs.326451		G2 EST, Weakly similar to dJ45P21.2 [H.sapiens] Hs.326451 AA931528
IMAGE:665082	AA194941		G1/S	ESTs Hs.101014		G1/S ESTs Hs.101014 AA194941
IMAGE:198104	R94633		G2	ESTs Hs.102004		G2 ESTs Hs.102004 R94633
IMAGE:925762	AI732373		G1/S	ESTs Hs.105826		G1/S ESTs Hs.105826 AI732373
IMAGE:41198	R56870		M/G1	ESTs Hs.106129		M/G1 ESTs Hs.106129 R56870
IMAGE:431242	AA682533		G2/M	ESTs Hs.111471		G2/M ESTs Hs.111471 AA682533
IMAGE:1639260	AI014667		S phase	ESTs Hs.112570		S phase ESTs Hs.112570 AI014667
IMAGE:435490	AA701352		M/G1	ESTs Hs.114055		M/G1 ESTs Hs.114055 AA701352
IMAGE:132835	R27432		M/G1	ESTs Hs.114055		M/G1 ESTs Hs.114055 R27432
IMAGE:1878979	AI278336		M/G1	ESTs Hs.115315		M/G1 ESTs Hs.115315 AI278336
IMAGE:431215	AA682521		G2/M	ESTs Hs.117261		G2/M ESTs Hs.117261 AA682521
IMAGE:461494	AA705050		G1/S	ESTs Hs.117269		G1/S ESTs Hs.117269 AA705050
IMAGE:1837950	AI220472		G1/S	ESTs Hs.120605		G1/S ESTs Hs.120605 AI220472
IMAGE:1422842	AA827482		M/G1	ESTs Hs.120734		M/G1 ESTs Hs.120734 AA827482
IMAGE:135240	R31512		M/G1	ESTs Hs.122444		M/G1 ESTs Hs.122444 R31512
IMAGE:1584883	AA939019		G2	ESTs Hs.122444		G2 ESTs Hs.122444 AA939019
IMAGE:41132	R59026		G1/S	ESTs Hs.124169		G1/S ESTs Hs.124169 R59026
IMAGE:1536451	AA919126		G2	ESTs Hs.126714		G2 ESTs Hs.126714 AA919126
IMAGE:1456138	AA862450		M/G1	ESTs Hs.127054		M/G1 ESTs Hs.127054 AA862450
IMAGE:1374830	AA947258		S phase	ESTs Hs.127703		S phase ESTs Hs.127703 AA947258
IMAGE:1601854	AI733433		S phase	ESTs Hs.129165		S phase ESTs Hs.129165 AI733433
IMAGE:811944	AA458547		M/G1	ESTs Hs.130214		M/G1 ESTs Hs.130214 AA458547
IMAGE:595606	AI821519		G2	ESTs Hs.130435		G2 ESTs Hs.130435 AI821519
IMAGE:1541324	AA927252		S phase	ESTs Hs.130460		S phase ESTs Hs.130460 AA927252
IMAGE:1557085	AA923168		G1/S	ESTs Hs.132493		G1/S ESTs Hs.132493 AA923168
IMAGE:1862628	AI053446		G2	ESTs Hs.133294		G2 ESTs Hs.133294 AI053446
IMAGE:1861173	AI144063		G2	ESTs Hs.133294		G2 ESTs Hs.133294 AI144063
IMAGE:1690915	AI092102		G2	ESTs Hs.135276		G2 ESTs Hs.135276 AI092102
IMAGE:108265	T70541		G2	ESTs Hs.13740		G2 ESTs Hs.13740 T70541
IMAGE:1842250	AI219737		G2	ESTs Hs.144796		G2 ESTs Hs.144796 AI219737
IMAGE:2029071	AI253072		G1/S	ESTs Hs.145383		G1/S ESTs Hs.145383 AI253072
IMAGE:1925517	AI820876		M/G1	ESTs Hs.146276		M/G1 ESTs Hs.146276 AI820876
IMAGE:206172	H61652		S phase	ESTs Hs.14743		S phase ESTs Hs.14743 H61652
IMAGE:1911913	AI278813		S phase	ESTs Hs.150325		S phase ESTs Hs.150325 AI278813
IMAGE:434302	AA693532		M/G1	ESTs Hs.150623		M/G1 ESTs Hs.150623 AA693532
IMAGE:430973	AA678348		G2	ESTs Hs.15091		G2 ESTs Hs.15091 AA678348
IMAGE:1456849	AI733001		G2	ESTs Hs.158357		G2 ESTs Hs.158357 AI733001
IMAGE:916498	AA573689		S phase	ESTs Hs.163921		S phase ESTs Hs.163921 AA573689
IMAGE:1618978	AA992090		S phase	ESTs Hs.165607		S phase ESTs Hs.165607 AA992090
IMAGE:1652927	AI080987		G1/S	ESTs Hs.166539		G1/S ESTs Hs.166539 AI080987
IMAGE:149245	R82522		G1/S	ESTs Hs.176950		G1/S ESTs Hs.176950 R82522
IMAGE:1032734	AA664350		G1/S	ESTs Hs.179309		G1/S ESTs Hs.179309 AA664350
IMAGE:782812	AA448251		G2	ESTs Hs.181315		G2 ESTs Hs.181315 AA448251
IMAGE:121543	T97707		M/G1	ESTs Hs.18140		M/G1 ESTs Hs.18140 T97707
IMAGE:701496	AA287975		G2	ESTs Hs.183299		G2 ESTs Hs.183299 AA287975
IMAGE:700503	AA291137		G2	ESTs Hs.183299		G2 ESTs Hs.183299 AA291137
IMAGE:121994	T98244		G2/M	ESTs Hs.18331		G2/M ESTs Hs.18331 T98244
IMAGE:143654	R76060		G1/S	ESTs Hs.188554		G1/S ESTs Hs.188554 R76060
IMAGE:292568	N68486		S phase	ESTs Hs.193379		S phase ESTs Hs.193379 N68486
IMAGE:359733	AA011308		G1/S	ESTs Hs.193804		G1/S ESTs Hs.193804 AA011308
IMAGE:244343	N52822		S phase	ESTs Hs.194125		S phase ESTs Hs.194125 N52822
IMAGE:126541	R06761		G1/S	ESTs Hs.194595		G1/S ESTs Hs.194595 R06761
IMAGE:156283	R73481		G1/S	ESTs Hs.205227		G1/S ESTs Hs.205227 R73481
IMAGE:264502	N20305		G2/M	ESTs Hs.20575		G2/M ESTs Hs.20575 N20305
IMAGE:291827	N72976		M/G1	ESTs Hs.21734		M/G1 ESTs Hs.21734 N72976
IMAGE:245986	N55457		G2	ESTs Hs.221197		G2 ESTs Hs.221197 N55457
IMAGE:196522	R91604		S phase	ESTs Hs.221847		S phase ESTs Hs.221847 R91604
IMAGE:76610	T51046		M/G1	ESTs Hs.222566		M/G1 ESTs Hs.222566 T51046
IMAGE:52949	H29336		G2/M	ESTs Hs.23213		G2/M ESTs Hs.23213 H29336
IMAGE:795851	AA461529		G2/M	ESTs Hs.23830		G2/M ESTs Hs.23830 AA461529
IMAGE:257387	N41320		G2/M	ESTs Hs.238797		G2/M ESTs Hs.238797 N41320
IMAGE:299609	N70848		G2	ESTs Hs.238797		G2 ESTs Hs.238797 N70848
IMAGE:121072	T96523		S phase	ESTs Hs.242998		S phase ESTs Hs.242998 T96523
IMAGE:234617	H77727		S phase	ESTs Hs.24908		S phase ESTs Hs.24908 H77727
IMAGE:754628	AA436252		G1/S	ESTs Hs.25933		G1/S ESTs Hs.25933 AA436252
IMAGE:50130	H16988		G2/M	ESTs Hs.26744		G2/M ESTs Hs.26744 H16988
IMAGE:131307	R22952		S phase	ESTs Hs.268685		S phase ESTs Hs.268685 R22952
IMAGE:202704	H53878		G1/S	ESTs Hs.268919		G1/S ESTs Hs.268919 H53878
IMAGE:214262	H77818		S phase	ESTs Hs.268991		S phase ESTs Hs.268991 H77818
IMAGE:50060	H17455		G2/M	ESTs Hs.27379		G2/M ESTs Hs.27379 H17455
IMAGE:810235	AA464707		M/G1	ESTs Hs.283705		M/G1 ESTs Hs.283705 AA464707
IMAGE:139689	R63922		M/G1	ESTs Hs.28462		M/G1 ESTs Hs.28462 R63922
IMAGE:878517	AA775845		G1/S	ESTs Hs.293419		G1/S ESTs Hs.293419 AA775845
IMAGE:289496	N63988		M/G1	ESTs Hs.293797		M/G1 ESTs Hs.293797 N63988
IMAGE:50227	H16772		G2	ESTs Hs.31444		G2 ESTs Hs.31444 H16772
IMAGE:626842	AA191424		G1/S	ESTs Hs.317584		G1/S ESTs Hs.317584 AA191424
IMAGE:197775	R93772		M/G1	ESTs Hs.32204		M/G1 ESTs Hs.32204 R93772
IMAGE:244350	N54811		S phase	ESTs Hs.332086		S phase ESTs Hs.332086 N54811
IMAGE:245517	N72518		G2/M	ESTs Hs.33446		G2/M ESTs Hs.33446 N72518
IMAGE:1854679	AI283530		M/G1	ESTs Hs.335043		M/G1 ESTs Hs.335043 AI283530
IMAGE:1011581	AA229808		G2	ESTs Hs.336812		G2 ESTs Hs.336812 AA229808
IMAGE:753028	AA436456		G1/S	ESTs Hs.339315		G1/S ESTs Hs.339315 AA436456
IMAGE:1894782	AI292036		G2	ESTs Hs.345019		G2 ESTs Hs.345019 AI292036
IMAGE:303099	N90779		G2	ESTs Hs.36830		G2 ESTs Hs.36830 N90779
IMAGE:714043	AA284907		G2	ESTs Hs.43148		G2 ESTs Hs.43148 AA284907
IMAGE:814995	AA465090		G2/M	ESTs Hs.44269		G2/M ESTs Hs.44269 AA465090
IMAGE:304927	N93122		G2	ESTs Hs.44380		G2 ESTs Hs.44380 N93122
IMAGE:289847	N62074		G1/S	ESTs Hs.48474		G1/S ESTs Hs.48474 N62074
IMAGE:565734	AA135809		G1/S	ESTs Hs.48480		G1/S ESTs Hs.48480 AA135809
IMAGE:292391	N62567		G2/M	ESTs Hs.48569		G2/M ESTs Hs.48569 N62567
IMAGE:204356	H59922		M/G1	ESTs Hs.4983		M/G1 ESTs Hs.4983 H59922
IMAGE:52031	H22936		G2/M	ESTs Hs.4983		G2/M ESTs Hs.4983 H22936
IMAGE:193777	H48143		S phase	ESTs Hs.50180		S phase ESTs Hs.50180 H48143
IMAGE:795322	AA454165		G2/M	ESTs Hs.53455		G2/M ESTs Hs.53455 AA454165
IMAGE:327064	W02785		G2/M	ESTs Hs.55272		G2/M ESTs Hs.55272 W02785
IMAGE:1585057	AA972654		S phase	ESTs Hs.5909		S phase ESTs Hs.5909 AA972654
IMAGE:415023	W93100		G1/S	ESTs Hs.59413		G1/S ESTs Hs.59413 W93100
IMAGE:364255	AA021549		G1/S	ESTs Hs.61126		G1/S ESTs Hs.61126 AA021549
IMAGE:429921	AA034055		G2/M	ESTs Hs.61708		G2/M ESTs Hs.61708 AA034055
IMAGE:796303	AA461307		G2	ESTs Hs.69662		G2 ESTs Hs.69662 AA461307
IMAGE:1649583	AI028074		S phase	ESTs Hs.71818		S phase ESTs Hs.71818 AI028074
IMAGE:347740	W81524		S phase	ESTs Hs.81263		S phase ESTs Hs.81263 W81524
IMAGE:243151	H94467		G2/M	ESTs Hs.8366		G2/M ESTs Hs.8366 H94467
IMAGE:684277	AA236015		S phase	ESTs Hs.87507		S phase ESTs Hs.87507 AA236015
IMAGE:757161	AA443948		G2/M	ESTs Hs.99037		G2/M ESTs Hs.99037 AA443948
IMAGE:810818	AI734166		S phase	ESTs Hs.99480		S phase ESTs Hs.99480 AI734166
IMAGE:811069	AI734203		S phase	ESTs Hs.99480		S phase ESTs Hs.99480 AI734203
IMAGE:796645	AA461474		S phase	ESTs Hs.99542		S phase ESTs Hs.99542 AA461474
IMAGE:726311	AI821587		G1/S	ESTs, Highly similar to A56429 I-kappa-B-related protein [H.sapiens] Hs.144614		G1/S ESTs, Highly similar to A56429 I-kappa-B-related protein [H.sapiens] Hs.144614 AI821587
IMAGE:2030843	AI373071		G2/M	ESTs, Highly similar to GLI1_HUMAN ZINC FINGER PROTEIN GLI1 [H.sapiens] Hs.331554		G2/M ESTs, Highly similar to GLI1_HUMAN ZINC FINGER PROTEIN GLI1 [H.sapiens] Hs.331554 AI373071
IMAGE:452363	AA700879		G2	ESTs, Highly similar to MKLP_HUMAN MITOTIC KINESIN-LIKE PROTEIN [H.sapiens] Hs.186814		G2 ESTs, Highly similar to MKLP_HUMAN MITOTIC KINESIN-LIKE PROTEIN [H.sapiens] Hs.186814 AA700879
IMAGE:1741749	AI733699		G2	ESTs, Moderately similar to ALU1_HUMAN ALU SUBFAMILY J SEQUENCE CONTAMINATION WARNING ENTRY [H.sapiens] Hs.144662		G2 ESTs, Moderately similar to ALU1_HUMAN ALU SUBFAMILY J SEQUENCE CONTAMINATION WARNING ENTRY [H.sapiens] Hs.144662 AI733699
IMAGE:454469	AA677337		G1/S	ESTs, Moderately similar to ALU1_HUMAN ALU SUBFAMILY J SEQUENCE CONTAMINATION WARNING ENTRY [H.sapiens] Hs.173495		G1/S ESTs, Moderately similar to ALU1_HUMAN ALU SUBFAMILY J SEQUENCE CONTAMINATION WARNING ENTRY [H.sapiens] Hs.173495 AA677337
IMAGE:1493227	AI733079		G2	ESTs, Moderately similar to ALUE_HUMAN !!!! ALU CLASS E WARNING ENTRY !!! [H.sapiens] Hs.125407		G2 ESTs, Moderately similar to ALUE_HUMAN !!!! ALU CLASS E WARNING ENTRY !!! [H.sapiens] Hs.125407 AI733079
IMAGE:47630	H11376		G1/S	ESTs, Moderately similar to Inactivation Gate Of Potassium Channel Raw3, Nmr, 8 Structures {SUB 1-30 [H.sapiens] Hs.106486		G1/S ESTs, Moderately similar to Inactivation Gate Of Potassium Channel Raw3, Nmr, 8 Structures {SUB 1-30 [H.sapiens] Hs.106486 H11376
IMAGE:230116	H78796		S phase	ESTs, Moderately similar to NRD2 convertase [H.sapiens] Hs.309734		S phase ESTs, Moderately similar to NRD2 convertase [H.sapiens] Hs.309734 H78796
IMAGE:755165	AI821683		S phase	ESTs, Moderately similar to Y481_HUMAN HYPOTHETICAL PROTEIN KIAA0481 [H.sapiens] Hs.261494		S phase ESTs, Moderately similar to Y481_HUMAN HYPOTHETICAL PROTEIN KIAA0481 [H.sapiens] Hs.261494 AI821683
IMAGE:462655	AA705010		G1/S	ESTs, Weakly similar to 1207289A reverse transcriptase related protein [H.sapiens] Hs.272135		G1/S ESTs, Weakly similar to 1207289A reverse transcriptase related protein [H.sapiens] Hs.272135 AA705010
IMAGE:194656	R84407		G2/M	ESTs, Weakly similar to 2004399A chromosomal protein [H.sapiens] Hs.221754		G2/M ESTs, Weakly similar to 2004399A chromosomal protein [H.sapiens] Hs.221754 R84407
IMAGE:1486028	AA912032		G2	ESTs, Weakly similar to 2108276A ssDNA-binding protein [R.norvegicus] Hs.181059		G2 ESTs, Weakly similar to 2108276A ssDNA-binding protein [R.norvegicus] Hs.181059 AA912032
IMAGE:1034676	AA779865		G2/M	ESTs, Weakly similar to ALU1_HUMAN ALU SUBFAMILY J SEQUENCE CONTAMINATION WARNING ENTRY [H.sapiens] Hs.182545		G2/M ESTs, Weakly similar to ALU1_HUMAN ALU SUBFAMILY J SEQUENCE CONTAMINATION WARNING ENTRY [H.sapiens] Hs.182545 AA779865
IMAGE:841176	AA486607		G2/M	ESTs, Weakly similar to ALU4_HUMAN ALU SUBFAMILY SB2 SEQUENCE CONTAMINATION WARNING ENTRY [H.sapiens] Hs.28848		G2/M ESTs, Weakly similar to ALU4_HUMAN ALU SUBFAMILY SB2 SEQUENCE CONTAMINATION WARNING ENTRY [H.sapiens] Hs.28848 AA486607
IMAGE:295594	N72576		G1/S	ESTs, Weakly similar to ALU8_HUMAN ALU SUBFAMILY SX SEQUENCE CONTAMINATION WARNING ENTRY [H.sapiens] Hs.226414		G1/S ESTs, Weakly similar to ALU8_HUMAN ALU SUBFAMILY SX SEQUENCE CONTAMINATION WARNING ENTRY [H.sapiens] Hs.226414 N72576
IMAGE:241282	H91219		G1/S	ESTs, Weakly similar to ALUB_HUMAN !!!! ALU CLASS B WARNING ENTRY !!! [H.sapiens] Hs.117949		G1/S ESTs, Weakly similar to ALUB_HUMAN !!!! ALU CLASS B WARNING ENTRY !!! [H.sapiens] Hs.117949 H91219
IMAGE:949944	AA600192		S phase	ESTs, Weakly similar to ALUB_HUMAN !!!! ALU CLASS B WARNING ENTRY !!! [H.sapiens] Hs.180552		S phase ESTs, Weakly similar to ALUB_HUMAN !!!! ALU CLASS B WARNING ENTRY !!! [H.sapiens] Hs.180552 AA600192
IMAGE:815255	AA481283		G1/S	ESTs, Weakly similar to ALUB_HUMAN !!!! ALU CLASS B WARNING ENTRY !!! [H.sapiens] Hs.180552		G1/S ESTs, Weakly similar to ALUB_HUMAN !!!! ALU CLASS B WARNING ENTRY !!! [H.sapiens] Hs.180552 AA481283
IMAGE:1569394	AA973625		S phase	ESTs, Weakly similar to CGHU6C collagen alpha 1(II) chain precursor [H.sapiens] Hs.127453		S phase ESTs, Weakly similar to CGHU6C collagen alpha 1(II) chain precursor [H.sapiens] Hs.127453 AA973625
IMAGE:884364	AA629538		G2/M	ESTs, Weakly similar to I38022 hypothetical protein [H.sapiens] Hs.165909		G2/M ESTs, Weakly similar to I38022 hypothetical protein [H.sapiens] Hs.165909 AA629538
IMAGE:194305	H50656		M/G1	ESTs, Weakly similar to I52523 nucleoporin p62 homolog - rat [R.norvegicus] Hs.120946		M/G1 ESTs, Weakly similar to I52523 nucleoporin p62 homolog - rat [R.norvegicus] Hs.120946 H50656
IMAGE:108425	T77758		G2/M	ESTs, Weakly similar to JC5314 CDC28/cdc2-like kinase associating arginine-serine cyclophilin [H.sapiens] Hs.14139		G2/M ESTs, Weakly similar to JC5314 CDC28/cdc2-like kinase associating arginine-serine cyclophilin [H.sapiens] Hs.14139 T77758
IMAGE:272262	N35592		G1/S	ESTs, Weakly similar to JC5314 CDC28/cdc2-like kinase associating arginine-serine cyclophilin [H.sapiens] Hs.7913		G1/S ESTs, Weakly similar to JC5314 CDC28/cdc2-like kinase associating arginine-serine cyclophilin [H.sapiens] Hs.7913 N35592
IMAGE:797042	AA463221		S phase	ESTs, Weakly similar to KIAA1074 protein [H.sapiens] Hs.200483		S phase ESTs, Weakly similar to KIAA1074 protein [H.sapiens] Hs.200483 AA463221
IMAGE:915908	AI732242		G1/S	ESTs, Weakly similar to MUC2_HUMAN MUCIN 2 PRECURSOR [H.sapiens] Hs.214410		G1/S ESTs, Weakly similar to MUC2_HUMAN MUCIN 2 PRECURSOR [H.sapiens] Hs.214410 AI732242
IMAGE:120162	T95274		G1/S	ESTs, Weakly similar to MUC2_HUMAN MUCIN 2 PRECURSOR [H.sapiens] Hs.214410		G1/S ESTs, Weakly similar to MUC2_HUMAN MUCIN 2 PRECURSOR [H.sapiens] Hs.214410 T95274
IMAGE:154477	R54855		G2/M	ESTs, Weakly similar to NUCL_HUMAN NUCLEOLIN [H.sapiens] Hs.30120		G2/M ESTs, Weakly similar to NUCL_HUMAN NUCLEOLIN [H.sapiens] Hs.30120 R54855
IMAGE:1623191	AA992658		S phase	ESTs, Weakly similar to PC4259 ferritin associated protein [H.sapiens] Hs.265592		S phase ESTs, Weakly similar to PC4259 ferritin associated protein [H.sapiens] Hs.265592 AA992658
IMAGE:229560	H67282		S phase	ESTs, Weakly similar to PC4259 ferritin associated protein [H.sapiens] Hs.265592		S phase ESTs, Weakly similar to PC4259 ferritin associated protein [H.sapiens] Hs.265592 H67282
IMAGE:511901	AI732452		S phase	ESTs, Weakly similar to phosphatidylserine-specific phospholipase A1 deltaC [H.sapiens] Hs.68864		S phase ESTs, Weakly similar to phosphatidylserine-specific phospholipase A1 deltaC [H.sapiens] Hs.68864 AI732452
IMAGE:587388	AI732595		S phase	ESTs, Weakly similar to phosphatidylserine-specific phospholipase A1 deltaC [H.sapiens] Hs.68864		S phase ESTs, Weakly similar to phosphatidylserine-specific phospholipase A1 deltaC [H.sapiens] Hs.68864 AI732595
IMAGE:128202	R11498		G1/S	ESTs, Weakly similar to putative p150 [H.sapiens] Hs.300070		G1/S ESTs, Weakly similar to putative p150 [H.sapiens] Hs.300070 R11498
IMAGE:754379	AA436174		G1/S	ESTs, Weakly similar to putative p150 [H.sapiens] Hs.37751		G1/S ESTs, Weakly similar to putative p150 [H.sapiens] Hs.37751 AA436174
IMAGE:51218	H18472		G2	ESTs, Weakly similar to T15936 hypothetical protein EGAP7.1 - Caenorhabditis elegans [C.elegans] Hs.15386		G2 ESTs, Weakly similar to T15936 hypothetical protein EGAP7.1 - Caenorhabditis elegans [C.elegans] Hs.15386 H18472
IMAGE:1881517	AI291262		G2/M	ESTs, Weakly similar to T19201 hypothetical protein C11G6.3 - Caenorhabditis elegans [C.elegans] Hs.283127		G2/M ESTs, Weakly similar to T19201 hypothetical protein C11G6.3 - Caenorhabditis elegans [C.elegans] Hs.283127 AI291262
IMAGE:190256	H29858		S phase	ESTs, Weakly similar to T20262 hypothetical protein C55A6.2 - Caenorhabditis elegans [C.elegans] Hs.126639		S phase ESTs, Weakly similar to T20262 hypothetical protein C55A6.2 - Caenorhabditis elegans [C.elegans] Hs.126639 H29858
IMAGE:289916	N59330		G2/M	ESTs, Weakly similar to T23976 hypothetical protein R06F6.5a - Caenorhabditis elegans [C.elegans] Hs.180591		G2/M ESTs, Weakly similar to T23976 hypothetical protein R06F6.5a - Caenorhabditis elegans [C.elegans] Hs.180591 N59330
IMAGE:41825	R54109		G2/M	ESTs, Weakly similar to T29361 hypothetical protein R05G6.10 - Caenorhabditis elegans [C.elegans] Hs.26096		G2/M ESTs, Weakly similar to T29361 hypothetical protein R05G6.10 - Caenorhabditis elegans [C.elegans] Hs.26096 R54109
IMAGE:1035796	AA628867		G2	ESTs, Weakly similar to T33068 hypothetical protein C35E7.9 - Caenorhabditis elegans [C.elegans] Hs.339665		G2 ESTs, Weakly similar to T33068 hypothetical protein C35E7.9 - Caenorhabditis elegans [C.elegans] Hs.339665 AA628867
IMAGE:1856923	AI271431		G2	ESTs, Weakly similar to T33068 hypothetical protein C35E7.9 - Caenorhabditis elegans [C.elegans] Hs.339665		G2 ESTs, Weakly similar to T33068 hypothetical protein C35E7.9 - Caenorhabditis elegans [C.elegans] Hs.339665 AI271431
IMAGE:131316	R22949		G2	ESTs, Weakly similar to T33068 hypothetical protein C35E7.9 - Caenorhabditis elegans [C.elegans] Hs.339665		G2 ESTs, Weakly similar to T33068 hypothetical protein C35E7.9 - Caenorhabditis elegans [C.elegans] Hs.339665 R22949
IMAGE:823609	AA496955		G1/S	ESTs, Weakly similar to T45059 hypothetical protein Y39B6B.gg [imported] - Caenorhabditis elegans [C.elegans] Hs.43213		G1/S ESTs, Weakly similar to T45059 hypothetical protein Y39B6B.gg [imported] - Caenorhabditis elegans [C.elegans] Hs.43213 AA496955
IMAGE:746217	AA417744		G2	ESTs, Weakly similar to unnamed protein product [H.sapiens] Hs.99807		G2 ESTs, Weakly similar to unnamed protein product [H.sapiens] Hs.99807 AA417744
IMAGE:824913	AA489023		G2	ESTs, Weakly similar to unnamed protein product [H.sapiens] Hs.99807		G2 ESTs, Weakly similar to unnamed protein product [H.sapiens] Hs.99807 AA489023
IMAGE:35147	R45550		S phase	ESTs, Weakly similar to UOG1_HUMAN UOG-1 PROTEIN [H.sapiens] Hs.118338		S phase ESTs, Weakly similar to UOG1_HUMAN UOG-1 PROTEIN [H.sapiens] Hs.118338 R45550
IMAGE:416049	W85843		S phase	ESTs, Weakly similar to UOG1_HUMAN UOG-1 PROTEIN [H.sapiens] Hs.118338		S phase ESTs, Weakly similar to UOG1_HUMAN UOG-1 PROTEIN [H.sapiens] Hs.118338 W85843
IMAGE:301867	N92478		G2	ESTs, Weakly similar to zinc finger protein [H.sapiens] Hs.71243		G2 ESTs, Weakly similar to zinc finger protein [H.sapiens] Hs.71243 N92478
IMAGE:240109	H82421		G2	Homo sapiens cDNA FLJ10632 fis, clone NT2RP2005637 Hs.202596		G2 Homo sapiens cDNA FLJ10632 fis, clone NT2RP2005637 Hs.202596 H82421
IMAGE:1468466	AA885096		G1/S	Homo sapiens cDNA FLJ11381 fis, clone HEMBA1000501 Hs.127797		G1/S Homo sapiens cDNA FLJ11381 fis, clone HEMBA1000501 Hs.127797 AA885096
IMAGE:512116	AA133590		G1/S	Homo sapiens cDNA FLJ11417 fis, clone HEMBA1000960 Hs.348514		G1/S Homo sapiens cDNA FLJ11417 fis, clone HEMBA1000960 Hs.348514 AA133590
IMAGE:898097	AA598803		G1/S	Homo sapiens cDNA FLJ11643 fis, clone HEMBA1004366 Hs.111496		G1/S Homo sapiens cDNA FLJ11643 fis, clone HEMBA1004366 Hs.111496 AA598803
IMAGE:784319	AA447098		M/G1	Homo sapiens cDNA FLJ11904 fis, clone HEMBB1000048 Hs.285519		M/G1 Homo sapiens cDNA FLJ11904 fis, clone HEMBB1000048 Hs.285519 AA447098
IMAGE:296429	W00890		M/G1	Homo sapiens cDNA FLJ11904 fis, clone HEMBB1000048 Hs.285519		M/G1 Homo sapiens cDNA FLJ11904 fis, clone HEMBB1000048 Hs.285519 W00890
IMAGE:1897431	AI301573		G1/S	Homo sapiens cDNA FLJ11941 fis, clone HEMBB1000649 Hs.124106		G1/S Homo sapiens cDNA FLJ11941 fis, clone HEMBB1000649 Hs.124106 AI301573
IMAGE:840614	AI734177		G1/S	Homo sapiens cDNA FLJ13571 fis, clone PLACE1008405 Hs.116278		G1/S Homo sapiens cDNA FLJ13571 fis, clone PLACE1008405 Hs.116278 AI734177
IMAGE:753684	AA406599		S phase	Homo sapiens cDNA FLJ13604 fis, clone PLACE1010401 Hs.23193		S phase Homo sapiens cDNA FLJ13604 fis, clone PLACE1010401 Hs.23193 AA406599
IMAGE:488115	AA058651		M/G1	Homo sapiens cDNA FLJ14175 fis, clone NT2RP2002979 Hs.288613		M/G1 Homo sapiens cDNA FLJ14175 fis, clone NT2RP2002979 Hs.288613 AA058651
IMAGE:898286	AA598974		G2	Homo sapiens cDNA FLJ14365 fis, clone HEMBA1001019 Hs.348383		G2 Homo sapiens cDNA FLJ14365 fis, clone HEMBA1001019 Hs.348383 AA598974
IMAGE:245324	N72461		S phase	Homo sapiens cDNA FLJ20796 fis, clone COL00301 Hs.113994		S phase Homo sapiens cDNA FLJ20796 fis, clone COL00301 Hs.113994 N72461
IMAGE:1568114	AA978323		S phase	Homo sapiens cDNA: FLJ21210 fis, clone COL00479 Hs.325093		S phase Homo sapiens cDNA: FLJ21210 fis, clone COL00479 Hs.325093 AA978323
IMAGE:126829	R07184		G1/S	Homo sapiens cDNA: FLJ21288 fis, clone COL01927 Hs.6019		G1/S Homo sapiens cDNA: FLJ21288 fis, clone COL01927 Hs.6019 R07184
IMAGE:129530	R11371		G2/M	Homo sapiens cDNA: FLJ21460 fis, clone COL04722 Hs.20787		G2/M Homo sapiens cDNA: FLJ21460 fis, clone COL04722 Hs.20787 R11371
IMAGE:309983	N95440		G2/M	Homo sapiens cDNA: FLJ21531 fis, clone COL06036 Hs.102941		G2/M Homo sapiens cDNA: FLJ21531 fis, clone COL06036 Hs.102941 N95440
IMAGE:123729	R01288		M/G1	Homo sapiens cDNA: FLJ21691 fis, clone COL09555 Hs.141003		M/G1 Homo sapiens cDNA: FLJ21691 fis, clone COL09555 Hs.141003 R01288
IMAGE:139705	R63929		G2/M	Homo sapiens cDNA: FLJ21869 fis, clone HEP02442 Hs.28465		G2/M Homo sapiens cDNA: FLJ21869 fis, clone HEP02442 Hs.28465 R63929
IMAGE:768453	AA495943		G2	Homo sapiens cDNA: FLJ22272 fis, clone HRC03192 Hs.50740		G2 Homo sapiens cDNA: FLJ22272 fis, clone HRC03192 Hs.50740 AA495943
IMAGE:366421	AA026385		G2	Homo sapiens cDNA: FLJ22355 fis, clone HRC06344 Hs.288283		G2 Homo sapiens cDNA: FLJ22355 fis, clone HRC06344 Hs.288283 AA026385
IMAGE:810305	AA463961		M/G1	Homo sapiens cDNA: FLJ23260 fis, clone COL05804, highly similar to HSU90911 Human clone 23652 mRNA sequence Hs.13996		M/G1 Homo sapiens cDNA: FLJ23260 fis, clone COL05804, highly similar to HSU90911 Human clone 23652 mRNA sequence Hs.13996 AA463961
IMAGE:1635178	AI005038		S phase	Homo sapiens cDNA: FLJ23285 fis, clone HEP09071 Hs.90424		S phase Homo sapiens cDNA: FLJ23285 fis, clone HEP09071 Hs.90424 AI005038
IMAGE:743230	AA400234		G1/S	Homo sapiens cDNA: FLJ23538 fis, clone LNG08010, highly similar to BETA2 Human MEN1 region clone epsilon/beta mRNA Hs.240443		G1/S Homo sapiens cDNA: FLJ23538 fis, clone LNG08010, highly similar to BETA2 Human MEN1 region clone epsilon/beta mRNA Hs.240443 AA400234
IMAGE:25061	R38944		G1/S	Homo sapiens clone 25061 mRNA sequence Hs.183475		G1/S Homo sapiens clone 25061 mRNA sequence Hs.183475 R38944
IMAGE:50441	H18031		G1/S	Homo sapiens clone 25110 mRNA sequence Hs.27262		G1/S Homo sapiens clone 25110 mRNA sequence Hs.27262 H18031
IMAGE:796723	AA443140		S phase	Homo sapiens clone CDABP0014 mRNA sequence Hs.92679		S phase Homo sapiens clone CDABP0014 mRNA sequence Hs.92679 AA443140
IMAGE:121239	T96708		G2	Homo sapiens clone CDABP0155 mRNA sequence Hs.145061		G2 Homo sapiens clone CDABP0155 mRNA sequence Hs.145061 T96708
IMAGE:841067	AA486770		M/G1	Homo sapiens clone FLB9213 PRO2474 mRNA, complete cds Hs.21321		M/G1 Homo sapiens clone FLB9213 PRO2474 mRNA, complete cds Hs.21321 AA486770
IMAGE:1417226	AA903913		M/G1	Homo sapiens clone TA40 untranslated mRNA, complete sequence Hs.333371		M/G1 Homo sapiens clone TA40 untranslated mRNA, complete sequence Hs.333371 AA903913
IMAGE:591457	AA160692		G2	Homo sapiens mRNA for FLJ00116 protein, partial cds Hs.72363		G2 Homo sapiens mRNA for FLJ00116 protein, partial cds Hs.72363 AA160692
IMAGE:279302	N48602		S phase	Homo sapiens mRNA for hypothetical protein (TR2/D15 gene) Hs.180545		S phase Homo sapiens mRNA for hypothetical protein (TR2/D15 gene) Hs.180545 N48602
IMAGE:308478	N95578		S phase	Homo sapiens mRNA; cDNA DKFZp434D0818 (from clone DKFZp434D0818) Hs.5855		S phase Homo sapiens mRNA; cDNA DKFZp434D0818 (from clone DKFZp434D0818) Hs.5855 N95578
IMAGE:279392	N48700		G2/M	Homo sapiens mRNA; cDNA DKFZp547B086 (from clone DKFZp547B086) Hs.36606		G2/M Homo sapiens mRNA; cDNA DKFZp547B086 (from clone DKFZp547B086) Hs.36606 N48700
IMAGE:80318	T64452		S phase	Homo sapiens mRNA; cDNA DKFZp547C244 (from clone DKFZp547C244) Hs.9460		S phase Homo sapiens mRNA; cDNA DKFZp547C244 (from clone DKFZp547C244) Hs.9460 T64452
IMAGE:73608	T55704		S phase	Homo sapiens mRNA; cDNA DKFZp564D156 (from clone DKFZp564D156) Hs.9927		S phase Homo sapiens mRNA; cDNA DKFZp564D156 (from clone DKFZp564D156) Hs.9927 T55704
IMAGE:416945	W87709		S phase	Homo sapiens mRNA; cDNA DKFZp564F093 (from clone DKFZp564F093) Hs.18724		S phase Homo sapiens mRNA; cDNA DKFZp564F093 (from clone DKFZp564F093) Hs.18724 W87709
IMAGE:418240	W90240		G1/S	Homo sapiens mRNA; cDNA DKFZp564O2364 (from clone DKFZp564O2364) Hs.28893		G1/S Homo sapiens mRNA; cDNA DKFZp564O2364 (from clone DKFZp564O2364) Hs.28893 W90240
IMAGE:289716	N62953		S phase	Homo sapiens mRNA; cDNA DKFZp566P1124 (from clone DKFZp566P1124) Hs.321022		S phase Homo sapiens mRNA; cDNA DKFZp566P1124 (from clone DKFZp566P1124) Hs.321022 N62953
IMAGE:701371	AA287958		G2/M	Homo sapiens mRNA; cDNA DKFZp586I1518 (from clone DKFZp586I1518) Hs.21739		G2/M Homo sapiens mRNA; cDNA DKFZp586I1518 (from clone DKFZp586I1518) Hs.21739 AA287958
IMAGE:132857	R26176		G2/M	Homo sapiens mRNA; cDNA DKFZp586N1323 (from clone DKFZp586N1323) Hs.24064		G2/M Homo sapiens mRNA; cDNA DKFZp586N1323 (from clone DKFZp586N1323) Hs.24064 R26176
IMAGE:134120	R30983		G2	Homo sapiens mRNA; cDNA DKFZp586N1323 (from clone DKFZp586N1323) Hs.24064		G2 Homo sapiens mRNA; cDNA DKFZp586N1323 (from clone DKFZp586N1323) Hs.24064 R30983
IMAGE:745296	AA625574		M/G1	Homo sapiens mRNA; cDNA DKFZp762B195 (from clone DKFZp762B195) Hs.347274		M/G1 Homo sapiens mRNA; cDNA DKFZp762B195 (from clone DKFZp762B195) Hs.347274 AA625574
IMAGE:148763	H12845		G1/S	Homo sapiens PRO2751 mRNA, complete cds Hs.283978		G1/S Homo sapiens PRO2751 mRNA, complete cds Hs.283978 H12845
IMAGE:509462	AA056377		G2/M	Homo sapiens, clone IMAGE:3351295, mRNA Hs.62711		G2/M Homo sapiens, clone IMAGE:3351295, mRNA Hs.62711 AA056377
IMAGE:612122	AA181439		G1/S	Homo sapiens, clone IMAGE:3542171, mRNA, partial cds Hs.347524		G1/S Homo sapiens, clone IMAGE:3542171, mRNA, partial cds Hs.347524 AA181439
IMAGE:309603	N94435		G2/M	Homo sapiens, clone IMAGE:3628973, mRNA, partial cds Hs.348012		G2/M Homo sapiens, clone IMAGE:3628973, mRNA, partial cds Hs.348012 N94435
IMAGE:143169	R73759		G2/M	Homo sapiens, clone IMAGE:3881549, mRNA Hs.346735		G2/M Homo sapiens, clone IMAGE:3881549, mRNA Hs.346735 R73759
IMAGE:208986	H60690		G1/S	Homo sapiens, clone IMAGE:3952677, mRNA, partial cds Hs.91192		G1/S Homo sapiens, clone IMAGE:3952677, mRNA, partial cds Hs.91192 H60690
IMAGE:1564601	AA960844		G1/S	Homo sapiens, clone IMAGE:4081483, mRNA Hs.186579		G1/S Homo sapiens, clone IMAGE:4081483, mRNA Hs.186579 AA960844
IMAGE:244277	N53024		G2/M	Homo sapiens, clone MGC:15396 IMAGE:3834331, mRNA, complete cds Hs.343236		G2/M Homo sapiens, clone MGC:15396 IMAGE:3834331, mRNA, complete cds Hs.343236 N53024
IMAGE:782622	AA448535		S phase	Homo sapiens, clone MGC:21655 IMAGE:4516234, mRNA, complete cds Hs.348374		S phase Homo sapiens, clone MGC:21655 IMAGE:4516234, mRNA, complete cds Hs.348374 AA448535
IMAGE:811010	AA485522		G1/S	Homo sapiens, clone MGC:4710 IMAGE:3534806, mRNA, complete cds Hs.12705		G1/S Homo sapiens, clone MGC:4710 IMAGE:3534806, mRNA, complete cds Hs.12705 AA485522
IMAGE:703559	AA278865		G2	Homo sapiens, clone MGC:4832 IMAGE:3604003, mRNA, complete cds Hs.88523		G2 Homo sapiens, clone MGC:4832 IMAGE:3604003, mRNA, complete cds Hs.88523 AA278865
IMAGE:293331	N64737		G1/S	Homo sapiens, Similar to hypothetical protein PRO1722, clone MGC:15692 IMAGE:3351479, mRNA, complete cds Hs.231444		G1/S Homo sapiens, Similar to hypothetical protein PRO1722, clone MGC:15692 IMAGE:3351479, mRNA, complete cds Hs.231444 N64737
IMAGE:511096	AA088458		G2/M	Homo sapiens, Similar to RIKEN cDNA 2010317E24 gene, clone IMAGE:3502019, mRNA, partial cds Hs.19322		G2/M Homo sapiens, Similar to RIKEN cDNA 2010317E24 gene, clone IMAGE:3502019, mRNA, partial cds Hs.19322 AA088458
IMAGE:296155	N70010		S phase	Homo sapiens, Similar to RIKEN cDNA 2610036L13 gene, clone MGC:16386 IMAGE:3938081, mRNA, complete cds Hs.23044		S phase Homo sapiens, Similar to RIKEN cDNA 2610036L13 gene, clone MGC:16386 IMAGE:3938081, mRNA, complete cds Hs.23044 N70010
IMAGE:1575410	AA971179		G1/S	Homo sapiens, Similar to RIKEN cDNA 2700064H14 gene, clone MGC:21390 IMAGE:4519078, mRNA, complete cds Hs.128096		G1/S Homo sapiens, Similar to RIKEN cDNA 2700064H14 gene, clone MGC:21390 IMAGE:4519078, mRNA, complete cds Hs.128096 AA971179
IMAGE:665013	AA194796		G1/S	Homo sapiens, Similar to RIKEN cDNA 2900009I07 gene, clone MGC:17347 IMAGE:2901027, mRNA, complete cds Hs.36828		G1/S Homo sapiens, Similar to RIKEN cDNA 2900009I07 gene, clone MGC:17347 IMAGE:2901027, mRNA, complete cds Hs.36828 AA194796
IMAGE:252491	H87567		S phase	Human clone 137308 mRNA, partial cds Hs.322149		S phase Human clone 137308 mRNA, partial cds Hs.322149 H87567
IMAGE:241043	H91398		S phase	Human clone 137308 mRNA, partial cds Hs.322149		S phase Human clone 137308 mRNA, partial cds Hs.322149 H91398
IMAGE:592699	AA159962		G2	Human DNA sequence from clone RP1-187J11 on chromosome 6q11.1-22.33. Contains the gene for a novel protein similar to S. pombe and S. cerevisiae predicted proteins, the gene for a novel protein simila Hs.72325		G2 Human DNA sequence from clone RP1-187J11 on chromosome 6q11.1-22.33. Contains the gene for a novel protein similar to S. pombe and S. cerevisiae predicted proteins, the gene for a novel protein simila Hs.72325 AA159962
IMAGE:753745	BG827634		G1/S	ESTs, Weakly similar to S57447 HPBRII-7 protein [H.sapiens] Hs.16346 AA410490		G1/S ESTs, Weakly similar to S57447 HPBRII-7 protein [H.sapiens] Hs.16346 AA410490 BG827634
IMAGE:1017349	AA548037		M/G1	AA548037		M/G1 AA548037 AA548037
IMAGE:243149	H94466		G2/M	ESTs, Weakly similar to 1819485A CENP-E protein [H.sapiens] Hs.167652 H94466		G2/M ESTs, Weakly similar to 1819485A CENP-E protein [H.sapiens] Hs.167652 H94466 H94466
IMAGE:840575	NM_015493	25959	G1/S	FLJ20004 **hypothetical protein FLJ20004 Hs.17311 AA487895		G1/S FLJ20004 **hypothetical protein FLJ20004 Hs.17311 AA487895 NM_015493
IMAGE:38816	R36063		G2	TUBA1 **tubulin, alpha 1 (testis specific) Hs.75318 R36063		G2 TUBA1 **tubulin, alpha 1 (testis specific) Hs.75318 R36063 R36063
IMAGE:292612	N68557		S phase	SUCLG2 **succinate-CoA ligase, GDP-forming, beta subunit Hs.247309 N68557		S phase SUCLG2 **succinate-CoA ligase, GDP-forming, beta subunit Hs.247309 N68557 N68557
IMAGE:825842	NM_001634	262	M/G1	AMD1 S-adenosylmethionine decarboxylase 1 Hs.262476 AA504772		M/G1 AMD1 S-adenosylmethionine decarboxylase 1 Hs.262476 AA504772 NM_001634
IMAGE:195786	R89286		G1/S	R89286		G1/S R89286 R89286
IMAGE:780958	BG745132		G2/M	ESTs Hs.21734 AA429809		G2/M ESTs Hs.21734 AA429809 BG745132
IMAGE:416010	NM_005119	9967	G2/M	TRAP150 thyroid hormone receptor-associated protein, 150 kDa subunit Hs.108319 W85832		G2/M TRAP150 thyroid hormone receptor-associated protein, 150 kDa subunit Hs.108319 W85832 NM_005119
IMAGE:279399	BG461671	54094	S phase	ESTs, Weakly similar to A46661 leukotriene B4 omega-hydroxylase [H.sapiens] Hs.169001 N45556		S phase ESTs, Weakly similar to A46661 leukotriene B4 omega-hydroxylase [H.sapiens] Hs.169001 N45556 BG461671
IMAGE:789091	NM_003512	8334	*S phase	H2AFL H2A histone family, member L Hs.28777 AA452933		*S phase H2AFL H2A histone family, member L Hs.28777 AA452933 NM_003512
IMAGE:132871	NM_022907	64942	G1/S	FLJ23053 hypothetical protein FLJ23053 Hs.94037 R25654		G1/S FLJ23053 hypothetical protein FLJ23053 Hs.94037 R25654 NM_022907
IMAGE:510273	AA053165		G1/S	**Homo sapiens cDNA: FLJ23538 fis, clone LNG08010, highly similar to BETA2 Human MEN1 region clone epsilon/beta mRNA Hs.240443 AA053165		G1/S **Homo sapiens cDNA: FLJ23538 fis, clone LNG08010, highly similar to BETA2 Human MEN1 region clone epsilon/beta mRNA Hs.240443 AA053165 AA053165
IMAGE:343343	AL138836	1955	S phase	EGFL5 EGF-like-domain, multiple 5 Hs.5599 W67981		S phase EGFL5 EGF-like-domain, multiple 5 Hs.5599 W67981 AL138836
IMAGE:235056	NM_022914	65057	G1/S	hypothetical protein 24432 Hs.78019 H79142		G1/S hypothetical protein 24432 Hs.78019 H79142 NM_022914
IMAGE:809657	AK024090		M/G1	Homo sapiens cDNA FLJ14028 fis, clone HEMBA1003838 Hs.281434 AA454682		M/G1 Homo sapiens cDNA FLJ14028 fis, clone HEMBA1003838 Hs.281434 AA454682 AK024090
IMAGE:788574	AA452872		S phase	AA452872		S phase AA452872 AA452872
IMAGE:770992	AA428252		S phase	EZH2 enhancer of zeste (Drosophila) homolog 2 Hs.77256 AA428252		S phase EZH2 enhancer of zeste (Drosophila) homolog 2 Hs.77256 AA428252 AA428252
IMAGE:136117	NM_017693	54841	S phase	FLJ20159 hypothetical protein FLJ20159 Hs.288809 R33122		S phase FLJ20159 hypothetical protein FLJ20159 Hs.288809 R33122 NM_017693
IMAGE:950603	AF055019		G2	ESTs Hs.21906 AA608546		G2 ESTs Hs.21906 AA608546 AF055019
IMAGE:809838	AA455102		G2	AA455102		G2 AA455102 AA455102
IMAGE:824031	AA490946		G2/M	AA490946		G2/M AA490946 AA490946
IMAGE:73188	NM_017730	54870	G2/M	FLJ20259 hypothetical protein FLJ20259 Hs.9956 T55949		G2/M FLJ20259 hypothetical protein FLJ20259 Hs.9956 T55949 NM_017730
IMAGE:745138	AL139327	7278	G2	TUBA2 tubulin, alpha 2 Hs.98102 AA626698		G2 TUBA2 tubulin, alpha 2 Hs.98102 AA626698 AL139327
IMAGE:236142	H61303		G1/S	E2F1 E2F transcription factor 1 Hs.96055 H61303		G1/S E2F1 E2F transcription factor 1 Hs.96055 H61303 H61303
IMAGE:811028	NM_001909	1509	G1/S	CTSD cathepsin D (lysosomal aspartyl protease) Hs.79572 AA485373		G1/S CTSD cathepsin D (lysosomal aspartyl protease) Hs.79572 AA485373 NM_001909
IMAGE:416095	W85890		M/G1	W85890		M/G1 W85890 W85890
IMAGE:898096	AA598795		M/G1	AA598795 Protein phosphatase 2 (formerly 2A), regulatory subunit B (P		M/G1 AA598795 Protein phosphatase 2 (formerly 2A), regulatory subunit B (P AA598795
IMAGE:510571	AB046767	57668	M/G1	KIAA1547 KIAA1547 protein Hs.31305 AA057737		M/G1 KIAA1547 KIAA1547 protein Hs.31305 AA057737 AB046767
IMAGE:415136	BE897965		G1/S	ESTs, Weakly similar to T00370 hypothetical protein KIAA0659 [H.sapiens] Hs.131899 W93155		G1/S ESTs, Weakly similar to T00370 hypothetical protein KIAA0659 [H.sapiens] Hs.131899 W93155 BE897965
IMAGE:809703	AK027519	57153	G2/M	CTL2 CTL2 gene Hs.105509 AA454710		G2/M CTL2 CTL2 gene Hs.105509 AA454710 AK027519
IMAGE:344049	W73732		G2/M	W73732 Host cell factor-1=VP16 transactivator interacting protein		G2/M W73732 Host cell factor-1=VP16 transactivator interacting protein W73732
IMAGE:22895	NM_002196	3642	G2/M	INSM1 insulinoma-associated 1 Hs.89584 R38640		G2/M INSM1 insulinoma-associated 1 Hs.89584 R38640 NM_002196
IMAGE:130819	R22183		G2	EST Hs.307975 R22182		G2 EST Hs.307975 R22182 R22183
IMAGE:292654	NM_015434	25896	S phase	DKFZP434B168 protein Hs.48604 N62684		S phase DKFZP434B168 protein Hs.48604 N62684 NM_015434
IMAGE:67092	T56726		G2	T56726		G2 T56726 T56726
IMAGE:25058	AF131741		G2	Homo sapiens clone 25058 mRNA sequence Hs.179397 R38894		G2 Homo sapiens clone 25058 mRNA sequence Hs.179397 R38894 AF131741
IMAGE:1575311	AB067516		S phase	ESTs Hs.128081 AA971042		S phase ESTs Hs.128081 AA971042 AB067516
IMAGE:196475	R92512		G2	ESTs Hs.302878 R92512		G2 ESTs Hs.302878 R92512 R92512
IMAGE:525926	NM_002997	6382	G1/S	SDC1 syndecan 1 Hs.82109 AA074511		G1/S SDC1 syndecan 1 Hs.82109 AA074511 NM_002997
IMAGE:295710	NM_018154	55723	S phase	FLJ10604 hypothetical protein FLJ10604 Hs.26516 N72697		S phase FLJ10604 hypothetical protein FLJ10604 Hs.26516 N72697 NM_018154
IMAGE:470914	NM_018991	54441	S phase	ESTs, Weakly similar to ALU7_HUMAN ALU SUBFAMILY SQ SEQUENCE CONTAMINATION WARNING ENTRY [H.sapiens] Hs.325158 AA032084		S phase ESTs, Weakly similar to ALU7_HUMAN ALU SUBFAMILY SQ SEQUENCE CONTAMINATION WARNING ENTRY [H.sapiens] Hs.325158 AA032084 NM_018991
IMAGE:202575	H53763		S phase	H53763		S phase H53763 H53763
IMAGE:50578	AL161981	23413	M/G1	FREQ frequenin (Drosophila) homolog Hs.301760 H16821		M/G1 FREQ frequenin (Drosophila) homolog Hs.301760 H16821 AL161981
IMAGE:884653	BF690013		G2	ESTs, Moderately similar to TBB2_HUMAN TUBULIN BETA-2 CHAIN [H.sapiens] Hs.23189 AA629908		G2 ESTs, Moderately similar to TBB2_HUMAN TUBULIN BETA-2 CHAIN [H.sapiens] Hs.23189 AA629908 BF690013
IMAGE:866633	NM_014962	22903	M/G1	KIAA0952 KIAA0952 protein Hs.7935 AA679150		M/G1 KIAA0952 KIAA0952 protein Hs.7935 AA679150 NM_014962
IMAGE:868517	AA775033		G2/M	AA775033		G2/M AA775033 AA775033
IMAGE:1555863	AK026497		M/G1	Homo sapiens cDNA: FLJ22844 fis, clone KAIA5181 Hs.296322 AA975103		M/G1 Homo sapiens cDNA: FLJ22844 fis, clone KAIA5181 Hs.296322 AA975103 AK026497
IMAGE:124829	R01148		S phase	EST		S phase EST R01148
IMAGE:328768	W40398		G2/M	EST Hs.323101 W40398		G2/M EST Hs.323101 W40398 W40398
IMAGE:435334	AA699928		G2/M	AA699928		G2/M AA699928 AA699928
IMAGE:1754192	AI204264		G1/S	AI204264		G1/S AI204264 AI204264
IMAGE:949983	AA600222		S phase	AA600222		S phase AA600222 AA600222
IMAGE:462861	AA705332		G2/M	AA705332		G2/M AA705332 AA705332
IMAGE:1939113	AJ271379		G1/S	ESTs Hs.21175 AI341642		G1/S ESTs Hs.21175 AI341642 AJ271379
IMAGE:1552835	AA928536		G1/S	AA928536		G1/S AA928536 AA928536
IMAGE:2009000	AI336973		G2	AI336973		G2 AI336973 AI336973
IMAGE:1838959	AI223432		G1/S	EST Hs.147907 AI223432		G1/S EST Hs.147907 AI223432 AI223432
IMAGE:1911334	NM_033445	92815	G2	H2AFL H2A histone family, member L Hs.28777 AI268551		G2 H2AFL H2A histone family, member L Hs.28777 AI268551 NM_033445
IMAGE:27098	NM_015516	25987	G2/M	E2IG4 hypothetical protein, estradiol-induced Hs.8361 R13844		G2/M E2IG4 hypothetical protein, estradiol-induced Hs.8361 R13844 NM_015516
IMAGE:647514	AA199733		M/G1	EST Hs.188697 AA199733		M/G1 EST Hs.188697 AA199733 AA199733
IMAGE:182933	H45443	10347	G1/S	ABCA7 ATP-binding cassette, sub-family A (ABC1), member 7 Hs.134514		G1/S ABCA7 ATP-binding cassette, sub-family A (ABC1), member 7 Hs.134514 H45443
IMAGE:768316	AA495766		G2/M	ABCC1 **ATP-binding cassette, sub-family C (CFTR/MRP), member 1 Hs.89433		G2/M ABCC1 **ATP-binding cassette, sub-family C (CFTR/MRP), member 1 Hs.89433 AA495766
IMAGE:625616	AA186613		S phase	ABCC5 **ATP-binding cassette, sub-family C (CFTR/MRP), member 5 Hs.108660		S phase ABCC5 **ATP-binding cassette, sub-family C (CFTR/MRP), member 5 Hs.108660 AA186613
IMAGE:590591	AA148045	112	G1/S	ADCY6 adenylate cyclase 6 Hs.12373		G1/S ADCY6 adenylate cyclase 6 Hs.12373 AA148045
IMAGE:142122	R69355	60312	M/G1	AFAP actin filament associated protein Hs.80306		M/G1 AFAP actin filament associated protein Hs.80306 R69355
IMAGE:773204	AA425692	262	M/G1	AMD1 S-adenosylmethionine decarboxylase 1 Hs.262476		M/G1 AMD1 S-adenosylmethionine decarboxylase 1 Hs.262476 AA425692
IMAGE:149013	R82299	262	M/G1	AMD1 S-adenosylmethionine decarboxylase 1 Hs.262476		M/G1 AMD1 S-adenosylmethionine decarboxylase 1 Hs.262476 R82299
IMAGE:2327739	AI693023	51203	G2/M	ANKT nucleolar protein ANKT Hs.279905		G2/M ANKT nucleolar protein ANKT Hs.279905 AI693023
IMAGE:951241	AA620485	51203	G2	ANKT nucleolar protein ANKT Hs.279905		G2 ANKT nucleolar protein ANKT Hs.279905 AA620485
IMAGE:461933	AA779949	51203	G2	ANKT nucleolar protein ANKT Hs.279905		G2 ANKT nucleolar protein ANKT Hs.279905 AA779949
IMAGE:28823	R40767	10947	G1/S	AP3M2 adaptor-related protein complex 3, mu 2 subunit Hs.77770		G1/S AP3M2 adaptor-related protein complex 3, mu 2 subunit Hs.77770 R40767
IMAGE:300590	W07537	10190	G2/M	APACD ATP binding protein associated with cell differentiation Hs.153884		G2/M APACD ATP binding protein associated with cell differentiation Hs.153884 W07537
IMAGE:2321462	AI674393	27301	G1/S	APEXL2 apurinic/apyrimidinic endonuclease(APEX nuclease)-like 2 protein Hs.154149		G1/S APEXL2 apurinic/apyrimidinic endonuclease(APEX nuclease)-like 2 protein Hs.154149 AI674393
IMAGE:321271	W52941	23779	G2/M	ARHGAP8 Rho GTPase activating protein 8 Hs.102336		G2/M ARHGAP8 Rho GTPase activating protein 8 Hs.102336 W52941
IMAGE:1703236	AI142552	10124	G2	ARL4 ADP-ribosylation factor-like 4 Hs.201672		G2 ARL4 ADP-ribosylation factor-like 4 Hs.201672 AI142552
IMAGE:51532	H20558	23204	G2/M	ARL6IP ADP-ribosylation factor-like 6 interacting protein Hs.75249		G2/M ARL6IP ADP-ribosylation factor-like 6 interacting protein Hs.75249 H20558
IMAGE:487172	AA043796		G2/M	B4GALT1 **UDP-Gal:betaGlcNAc beta 1,4- galactosyltransferase, polypeptide 1 Hs.198248		G2/M B4GALT1 **UDP-Gal:betaGlcNAc beta 1,4- galactosyltransferase, polypeptide 1 Hs.198248 AA043796
IMAGE:1869329	AI269958	9531	M/G1	BAG3 BCL2-associated athanogene 3 Hs.15259		M/G1 BAG3 BCL2-associated athanogene 3 Hs.15259 AI269958
IMAGE:1015874	AA558464	580	G1/S	BARD1 BRCA1 associated RING domain 1 Hs.54089		G1/S BARD1 BRCA1 associated RING domain 1 Hs.54089 AA558464
IMAGE:841217	AA486738	583	S phase	BBS2 Bardet-Biedl syndrome 2 Hs.332633		S phase BBS2 Bardet-Biedl syndrome 2 Hs.332633 AA486738
IMAGE:256680	H96392	80321	M/G1	BITE p10-binding protein Hs.42315		M/G1 BITE p10-binding protein Hs.42315 H96392
IMAGE:294089	W01974	63909	G2/M	BK1048E9.5 hypothetical protein bK1048E9.5 Hs.6657		G2/M BK1048E9.5 hypothetical protein bK1048E9.5 Hs.6657 W01974
IMAGE:666038	AA193608		S phase	BMI1 **murine leukemia viral (bmi-1) oncogene homolog Hs.431		S phase BMI1 **murine leukemia viral (bmi-1) oncogene homolog Hs.431 AA193608
IMAGE:843206	AA488428	29117	G1/S	BRD7 bromodomain-containing 7 Hs.279762		G1/S BRD7 bromodomain-containing 7 Hs.279762 AA488428
IMAGE:742952	AA405955		G2	BUB3 **BUB3 (budding uninhibited by benzimidazoles 3, yeast) homolog Hs.40323		G2 BUB3 **BUB3 (budding uninhibited by benzimidazoles 3, yeast) homolog Hs.40323 AA405955
IMAGE:293830	N63911	55291	M/G1	C11orf23 chromosome 11 open reading frame 23 Hs.180817		M/G1 C11orf23 chromosome 11 open reading frame 23 Hs.180817 N63911
1292829	AA776702	741	G2	C11orf5 chromosome 11 open reading frame 5 Hs.121025		G2 C11orf5 chromosome 11 open reading frame 5 Hs.121025 AA776702
IMAGE:47665	H11572	10712	M/G1	C1orf2 chromosome 1 open reading frame 2 Hs.19554		M/G1 C1orf2 chromosome 1 open reading frame 2 Hs.19554 H11572
IMAGE:703838	AA279100	734	S phase	C8orf1 chromosome 8 open reading frame 1 Hs.40539		S phase C8orf1 chromosome 8 open reading frame 1 Hs.40539 AA279100
IMAGE:160672	H25041	734	S phase	C8orf1 chromosome 8 open reading frame 1 Hs.40539		S phase C8orf1 chromosome 8 open reading frame 1 Hs.40539 H25041
IMAGE:279380	N48924	23473	G1/S	CAPN7 calpain 7 Hs.7145		G1/S CAPN7 calpain 7 Hs.7145 N48924
IMAGE:1710872	AI139106	11335	M/G1	CBX3 chromobox homolog 3 (Drosophila HP1 gamma) Hs.278554		M/G1 CBX3 chromobox homolog 3 (Drosophila HP1 gamma) Hs.278554 AI139106
IMAGE:36374	R46787	891	G2/M	CCNB1 cyclin B1 Hs.23960		G2/M CCNB1 cyclin B1 Hs.23960 R46787
IMAGE:856289	AA774665	9133	G2/M	CCNB2 cyclin B2 Hs.194698		G2/M CCNB2 cyclin B2 Hs.194698 AA774665
IMAGE:113856	T77451	893	M/G1	CCND1 cyclin D1 (PRAD1: parathyroid adenomatosis 1) Hs.82932		M/G1 CCND1 cyclin D1 (PRAD1: parathyroid adenomatosis 1) Hs.82932 T77451
IMAGE:841641	AA487700	893	G2/M	CCND1 cyclin D1 (PRAD1: parathyroid adenomatosis 1) Hs.82932		G2/M CCND1 cyclin D1 (PRAD1: parathyroid adenomatosis 1) Hs.82932 AA487700
IMAGE:68950	T54121	898	G1/S	CCNE1 cyclin E1 Hs.9700		G1/S CCNE1 cyclin E1 Hs.9700 T54121
IMAGE:50484	H17727	23552	G1/S	CCRK cell cycle related kinase Hs.26322		G1/S CCRK cell cycle related kinase Hs.26322 H17727
IMAGE:859586	AA668681	998	M/G1	CDC42 cell division cycle 42 (GTP-binding protein, 25kD) Hs.146409		M/G1 CDC42 cell division cycle 42 (GTP-binding protein, 25kD) Hs.146409 AA668681
IMAGE:153520	AI820687	64403	S phase	CDH24 cadherin-like 24 Hs.155912		S phase CDH24 cadherin-like 24 Hs.155912 AI820687
IMAGE:155799	AI820755	64403	S phase	CDH24 cadherin-like 24 Hs.155912		S phase CDH24 cadherin-like 24 Hs.155912 AI820755
IMAGE:785821	AA449061	23580	G2	CEP4 Cdc42 effector protein 4; binder of Rho GTPases 4 Hs.3903		G2 CEP4 Cdc42 effector protein 4; binder of Rho GTPases 4 Hs.3903 AA449061
IMAGE:788273	AA454115		G2/M	CIA **coactivator independent of AF-2 Hs.288140		G2/M CIA **coactivator independent of AF-2 Hs.288140 AA454115
IMAGE:826974	AA521358	57727	G2/M	CIA coactivator independent of AF-2 Hs.288140		G2/M CIA coactivator independent of AF-2 Hs.288140 AA521358
IMAGE:1535229	AA918007	57727	G2	CIA coactivator independent of AF-2 Hs.288140		G2 CIA coactivator independent of AF-2 Hs.288140 AA918007
IMAGE:825228	AA504389	26586	G2/M	CKAP2 cytoskeleton associated protein 2 Hs.24641		G2/M CKAP2 cytoskeleton associated protein 2 Hs.24641 AA504389
IMAGE:71902	T52152	26586	G2	CKAP2 cytoskeleton associated protein 2 Hs.24641		G2 CKAP2 cytoskeleton associated protein 2 Hs.24641 T52152
IMAGE:1475463	AA857804	63967	G1/S	CLASPIN homolog of Xenopus Claspin Hs.175613		G1/S CLASPIN homolog of Xenopus Claspin Hs.175613 AA857804
IMAGE:853066	AA668256	9918	G2/M	CNAP1 chromosome condensation-related SMC-associated protein 1 Hs.5719		G2/M CNAP1 chromosome condensation-related SMC-associated protein 1 Hs.5719 AA668256
IMAGE:360436	AA013481	1316	G2	COPEB core promoter element binding protein Hs.285313		G2 COPEB core promoter element binding protein Hs.285313 AA013481
IMAGE:510381	AA055584	1316	G2	COPEB core promoter element binding protein Hs.285313		G2 COPEB core promoter element binding protein Hs.285313 AA055584
IMAGE:366558	AA026669		G2/M	CTNNA1 **catenin (cadherin-associated protein), alpha 1 (102kD) Hs.178452		G2/M CTNNA1 **catenin (cadherin-associated protein), alpha 1 (102kD) Hs.178452 AA026669
IMAGE:272192	N35493		M/G1	D10S170 **DNA segment, single copy, probe pH4 (transforming sequence, thyroid-1, Hs.315591		M/G1 D10S170 **DNA segment, single copy, probe pH4 (transforming sequence, thyroid-1, Hs.315591 N35493
IMAGE:2018941	AI362799	8568	G2/M	D21S2056E DNA segment on chromosome 21 (unique) 2056 expressed sequence Hs.110757		G2/M D21S2056E DNA segment on chromosome 21 (unique) 2056 expressed sequence Hs.110757 AI362799
IMAGE:2307015	AI652290	10615	G2/M	DEEPEST mitotic spindle coiled-coil related protein Hs.16244		G2/M DEEPEST mitotic spindle coiled-coil related protein Hs.16244 AI652290
IMAGE:121857	T97349	10615	G2/M	DEEPEST mitotic spindle coiled-coil related protein Hs.16244		G2/M DEEPEST mitotic spindle coiled-coil related protein Hs.16244 T97349
IMAGE:768172	AA424790	1719	S phase	DHFR dihydrofolate reductase Hs.83765		S phase DHFR dihydrofolate reductase Hs.83765 AA424790
IMAGE:824776	AA489055	1719	S phase	DHFR dihydrofolate reductase Hs.83765		S phase DHFR dihydrofolate reductase Hs.83765 AA489055
IMAGE:244205	N52980	1719	S phase	DHFR dihydrofolate reductase Hs.83765		S phase DHFR dihydrofolate reductase Hs.83765 N52980
IMAGE:123971	R01547	1719	S phase	DHFR dihydrofolate reductase Hs.83765		S phase DHFR dihydrofolate reductase Hs.83765 R01547
IMAGE:843276	AA488658	25832	G2	DJ328E19.C1.1 hypothetical protein Hs.218329		G2 DJ328E19.C1.1 hypothetical protein Hs.218329 AA488658
IMAGE:743182	AA400021	57026	G1/S	DJ37E16.5 hypothetical protein dJ37E16.5 Hs.5790		G1/S DJ37E16.5 hypothetical protein dJ37E16.5 Hs.5790 AA400021
IMAGE:270331	N41481	91687	G2	dJ383J4.3 hypothetical gene supported by BC007071 Hs.117305		G2 dJ383J4.3 hypothetical gene supported by BC007071 Hs.117305 N41481
IMAGE:1568586	AI793296		G1/S	DJ465N24.2.1 **hypothetical protein dJ465N24.2.1 Hs.8084		G1/S DJ465N24.2.1 **hypothetical protein dJ465N24.2.1 Hs.8084 AI793296
IMAGE:200402	R96998	81610	G2	DJ616B8.3 hypothetical protein dJ616B8.3 Hs.70704		G2 DJ616B8.3 hypothetical protein dJ616B8.3 Hs.70704 R96998
IMAGE:1608910	AA991355	84072	G1/S	DKFZP434A1315 hypothetical protein DKFZp434A1315 Hs.298312		G1/S DKFZP434A1315 hypothetical protein DKFZp434A1315 Hs.298312 AA991355
IMAGE:462333	AA705518	25886	G2/M	DKFZP434C245 DKFZP434C245 protein Hs.59461		G2/M DKFZP434C245 DKFZP434C245 protein Hs.59461 AA705518
IMAGE:782362	AA432275	84213	M/G1	DKFZp434D1428 hypothetical protein DKFZp434D1428 Hs.321775		M/G1 DKFZp434D1428 hypothetical protein DKFZp434D1428 Hs.321775 AA432275
IMAGE:1640931	AI024401	26170	G2	DKFZP434J046 DKFZP434J046 protein Hs.116244		G2 DKFZP434J046 DKFZP434J046 protein Hs.116244 AI024401
IMAGE:109314	T80848	56976	G2/M	DKFZp547O146 hypothetical protein DKFZp547O146 Hs.91246		G2/M DKFZp547O146 hypothetical protein DKFZp547O146 Hs.91246 T80848
IMAGE:366389	AA025807	26118	G2/M	DKFZP564A122 DKFZP564A122 protein Hs.187991		G2/M DKFZP564A122 DKFZP564A122 protein Hs.187991 AA025807
IMAGE:133456	R27345	26118	G2/M	DKFZP564A122 DKFZP564A122 protein Hs.187991		G2/M DKFZP564A122 DKFZP564A122 protein Hs.187991 R27345
IMAGE:234004	H66150	26118	G2	DKFZP564A122 DKFZP564A122 protein Hs.187991		G2 DKFZP564A122 DKFZP564A122 protein Hs.187991 H66150
IMAGE:246881	N53236	26118	G2	DKFZP564A122 DKFZP564A122 protein Hs.187991		G2 DKFZP564A122 DKFZP564A122 protein Hs.187991 N53236
IMAGE:246661	N57723	26118	G2	DKFZP564A122 DKFZP564A122 protein Hs.187991		G2 DKFZP564A122 DKFZP564A122 protein Hs.187991 N57723
IMAGE:259884	N42045	57211	G2	DKFZP564D0462 hypothetical protein DKFZp564D0462 Hs.44197		G2 DKFZP564D0462 hypothetical protein DKFZp564D0462 Hs.44197 N42045
IMAGE:796767	AA460732	25925	G2/M	DKFZP564D0764 DKFZP564D0764 protein Hs.26799		G2/M DKFZP564D0764 DKFZP564D0764 protein Hs.26799 AA460732
IMAGE:30114	R41227		S phase	DKFZP564F013 **hypothetical protein DKFZp564F013 Hs.128653		S phase DKFZP564F013 **hypothetical protein DKFZp564F013 Hs.128653 R41227
IMAGE:243727	N39306	25948	G2	DKFZP566C134 DKFZP566C134 protein Hs.20237		G2 DKFZP566C134 DKFZP566C134 protein Hs.20237 N39306
IMAGE:1540236	AA936181	55355	G2	DKFZp762E1312 hypothetical protein DKFZp762E1312 Hs.104859		G2 DKFZp762E1312 hypothetical protein DKFZp762E1312 Hs.104859 AA936181
IMAGE:66406	T66936	55355	G2	DKFZp762E1312 hypothetical protein DKFZp762E1312 Hs.104859		G2 DKFZp762E1312 hypothetical protein DKFZp762E1312 Hs.104859 T66936
IMAGE:842896	AA486418	55536	G1/S	DKFZp762L0311 hypothetical protein DKFZp762L0311 Hs.16520		G1/S DKFZp762L0311 hypothetical protein DKFZp762L0311 Hs.16520 AA486418
IMAGE:490728	AA129860	9988	G1/S	DMTF1 cyclin D binding Myb-like transcription factor 1 Hs.5671		G1/S DMTF1 cyclin D binding Myb-like transcription factor 1 Hs.5671 AA129860
IMAGE:782176	AA431203	10049	M/G1	DNAJB6 DnaJ (Hsp40) homolog, subfamily B, member 6 Hs.181195		M/G1 DNAJB6 DnaJ (Hsp40) homolog, subfamily B, member 6 Hs.181195 AA431203
IMAGE:488033	AA045792	4189	G1/S	DNAJB9 DnaJ (Hsp40) homolog, subfamily B, member 9 Hs.6790		G1/S DNAJB9 DnaJ (Hsp40) homolog, subfamily B, member 9 Hs.6790 AA045792
IMAGE:813275	AA455940	9829	S phase	DNAJC6 DnaJ (Hsp40) homolog, subfamily C, member 6 Hs.44896		S phase DNAJC6 DnaJ (Hsp40) homolog, subfamily C, member 6 Hs.44896 AA455940
IMAGE:752770	AA417895	29980	S phase	DONSON downstream neighbor of SON Hs.17834		S phase DONSON downstream neighbor of SON Hs.17834 AA417895
IMAGE:119609	AI732249	29980	G1/S	DONSON downstream neighbor of SON Hs.17834		G1/S DONSON downstream neighbor of SON Hs.17834 AI732249
IMAGE:203275	H54751		S phase	EIF4A2 **eukaryotic translation initiation factor 4A, isoform 2 Hs.173912		S phase EIF4A2 **eukaryotic translation initiation factor 4A, isoform 2 Hs.173912 H54751
IMAGE:49693	H15159		S phase	EIF4EBP2 **eukaryotic translation initiation factor 4E binding protein 2 Hs.278712		S phase EIF4EBP2 **eukaryotic translation initiation factor 4E binding protein 2 Hs.278712 H15159
IMAGE:511786	AI732412	10595	G2/M	ERN2 ER to nucleus signalling 2 Hs.114905		G2/M ERN2 ER to nucleus signalling 2 Hs.114905 AI732412
IMAGE:511967	AI732416	10595	G2/M	ERN2 ER to nucleus signalling 2 Hs.114905		G2/M ERN2 ER to nucleus signalling 2 Hs.114905 AI732416
IMAGE:684500	AA251063		G1/S	ESD **esterase D/formylglutathione hydrolase Hs.82193		G1/S ESD **esterase D/formylglutathione hydrolase Hs.82193 AA251063
IMAGE:275634	R94840	2177	G2	FANCD Fanconi anemia, complementation group D Hs.15607		G2 FANCD Fanconi anemia, complementation group D Hs.15607 R94840
IMAGE:126230	R06252	51341	M/G1	FBI1 HIV-1 inducer of short transcripts binding protein; lymphoma related factor Hs.104640		M/G1 FBI1 HIV-1 inducer of short transcripts binding protein; lymphoma related factor Hs.104640 R06252
IMAGE:248957	H82379	10116	G2/M	FEM1B FEM-1 (C.elegans) homolog b Hs.6048		G2/M FEM1B FEM-1 (C.elegans) homolog b Hs.6048 H82379
IMAGE:366541	AA026737		G2/M	FGA **fibrinogen, A alpha polypeptide Hs.90765		G2/M FGA **fibrinogen, A alpha polypeptide Hs.90765 AA026737
IMAGE:301875	N92489	55070	G2	FLJ10103 hypothetical protein FLJ10103 Hs.42140		G2 FLJ10103 hypothetical protein FLJ10103 Hs.42140 N92489
IMAGE:810468	AA464481	55082	G1/S	FLJ10154 hypothetical protein FLJ10154 Hs.179972		G1/S FLJ10154 hypothetical protein FLJ10154 Hs.179972 AA464481
IMAGE:773147	AA425578	54478	G2/M	FLJ10156 hypothetical protein Hs.86211		G2/M FLJ10156 hypothetical protein Hs.86211 AA425578
IMAGE:213824	H72444		G1/S	FLJ10339 **hypothetical protein FLJ10339 Hs.343745		G1/S FLJ10339 **hypothetical protein FLJ10339 Hs.343745 H72444
IMAGE:1569636	AI793310		G2/M	FLJ10342 **hypothetical protein FLJ10342 Hs.101514		G2/M FLJ10342 **hypothetical protein FLJ10342 Hs.101514 AI793310
IMAGE:824001	AA490935	55122	G2/M	FLJ10342 hypothetical protein FLJ10342 Hs.101514		G2/M FLJ10342 hypothetical protein FLJ10342 Hs.101514 AA490935
IMAGE:1869870	AI792602		G2/M	FLJ10392 **hypothetical protein FLJ10392 Hs.20887		G2/M FLJ10392 **hypothetical protein FLJ10392 Hs.20887 AI792602
IMAGE:809788	AA454745	55140	M/G1	FLJ10422 hypothetical protein FLJ10422 Hs.267905		M/G1 FLJ10422 hypothetical protein FLJ10422 Hs.267905 AA454745
IMAGE:1646048	AI031571	55710	G2/M	FLJ10461 hypothetical protein FLJ10461 Hs.122579		G2/M FLJ10461 hypothetical protein FLJ10461 Hs.122579 AI031571
IMAGE:795229	AA454139	55712	S phase	FLJ10466 hypothetical protein FLJ10466 Hs.121073		S phase FLJ10466 hypothetical protein FLJ10466 Hs.121073 AA454139
IMAGE:858510	AA774082	55712	S phase	FLJ10466 hypothetical protein FLJ10466 Hs.121073		S phase FLJ10466 hypothetical protein FLJ10466 Hs.121073 AA774082
IMAGE:292936	N63744	55143	G2	FLJ10468 hypothetical protein FLJ10468 Hs.48855		G2 FLJ10468 hypothetical protein FLJ10468 Hs.48855 N63744
IMAGE:48167	H12254	55148	G1/S	FLJ10483 hypothetical protein FLJ10483 Hs.6877		G1/S FLJ10483 hypothetical protein FLJ10483 Hs.6877 H12254
IMAGE:132476	R26684	55156	G2	FLJ10511 hypothetical protein FLJ10511 Hs.106768		G2 FLJ10511 hypothetical protein FLJ10511 Hs.106768 R26684
IMAGE:61386	T40891	55719	S phase	FLJ10512 hypothetical protein FLJ10512 Hs.93581		S phase FLJ10512 hypothetical protein FLJ10512 Hs.93581 T40891
IMAGE:504308	AA131908	55165	G2/M	FLJ10540 hypothetical protein FLJ10540 Hs.14559		G2/M FLJ10540 hypothetical protein FLJ10540 Hs.14559 AA131908
IMAGE:796623	AA460110	55166	S phase	FLJ10545 hypothetical protein FLJ10545 Hs.88663		S phase FLJ10545 hypothetical protein FLJ10545 Hs.88663 AA460110
IMAGE:753602	AA479944	55186	G1/S	FLJ10618 hypothetical protein FLJ10618 Hs.42484		G1/S FLJ10618 hypothetical protein FLJ10618 Hs.42484 AA479944
IMAGE:814094	AA465429	55729	G2/M	FLJ10688 hypothetical protein FLJ10688 Hs.118793		G2/M FLJ10688 hypothetical protein FLJ10688 Hs.118793 AA465429
IMAGE:626206	AA188761	55215	S phase	FLJ10719 hypothetical protein FLJ10719 Hs.334828		S phase FLJ10719 hypothetical protein FLJ10719 Hs.334828 AA188761
IMAGE:460438	AA677552	55247	G2	FLJ10858 hypothetical protein FLJ10858 Hs.134403		G2 FLJ10858 hypothetical protein FLJ10858 Hs.134403 AA677552
IMAGE:277808	N47593	56204	S phase	FLJ10980 hypothetical protein FLJ10980 Hs.29716		S phase FLJ10980 hypothetical protein FLJ10980 Hs.29716 N47593
IMAGE:700557	AA291183	65117	S phase	FLJ11021 hypothetical protein FLJ11021 similar to splicing factor, arginine/serine-rich 4 Hs.81648		S phase FLJ11021 hypothetical protein FLJ11021 similar to splicing factor, arginine/serine-rich 4 Hs.81648 AA291183
IMAGE:1694526	AI124082	55771	G2	FLJ11029 hypothetical protein FLJ11029 Hs.274448		G2 FLJ11029 hypothetical protein FLJ11029 Hs.274448 AI124082
IMAGE:121798	T98201	54491	S phase	FLJ11127 hypothetical protein Hs.91165		S phase FLJ11127 hypothetical protein Hs.91165 T98201
IMAGE:825210	AA504369	55320	G2/M	FLJ11186 hypothetical protein FLJ11186 Hs.89278		G2/M FLJ11186 hypothetical protein FLJ11186 Hs.89278 AA504369
IMAGE:726588	AA398138	55320	G2	FLJ11186 hypothetical protein FLJ11186 Hs.89278		G2 FLJ11186 hypothetical protein FLJ11186 Hs.89278 AA398138
IMAGE:258761	N30185	55789	G2/M	FLJ11252 hypothetical protein FLJ11252 Hs.23495		G2/M FLJ11252 hypothetical protein FLJ11252 Hs.23495 N30185
IMAGE:1759290	AI219094	55790	G2/M	FLJ11264 hypothetical protein FLJ11264 Hs.11260		G2/M FLJ11264 hypothetical protein FLJ11264 Hs.11260 AI219094
IMAGE:137655	R37888	55791	M/G1	FLJ11269 hypothetical protein FLJ11269 Hs.25245		M/G1 FLJ11269 hypothetical protein FLJ11269 Hs.25245 R37888
IMAGE:378433	AA775600	55344	G1/S	FLJ11323 hypothetical protein FLJ11323 Hs.25625		G1/S FLJ11323 hypothetical protein FLJ11323 Hs.25625 AA775600
IMAGE:38542	R49708	55344	G1/S	FLJ11323 hypothetical protein FLJ11323 Hs.25625		G1/S FLJ11323 hypothetical protein FLJ11323 Hs.25625 R49708
IMAGE:293177	N63866	55347	S phase	FLJ11342 hypothetical protein FLJ11342 Hs.266514		S phase FLJ11342 hypothetical protein FLJ11342 Hs.266514 N63866
IMAGE:809729	AA455506	84118	G1/S	FLJ11626 hypothetical protein FLJ11626 Hs.334837		G1/S FLJ11626 hypothetical protein FLJ11626 Hs.334837 AA455506
IMAGE:322794	W39733	80025	G1/S	FLJ11729 hypothetical protein FLJ11729 Hs.286212		G1/S FLJ11729 hypothetical protein FLJ11729 Hs.286212 W39733
IMAGE:823582	AA497119	64427	S phase	FLJ12788 hypothetical protein FLJ12788 Hs.20242		S phase FLJ12788 hypothetical protein FLJ12788 Hs.20242 AA497119
IMAGE:1700401	AI792390	64427	S phase	FLJ12788 hypothetical protein FLJ12788 Hs.20242		S phase FLJ12788 hypothetical protein FLJ12788 Hs.20242 AI792390
IMAGE:292392	N68390	80010	S phase	FLJ12888 hypothetical protein FLJ12888 Hs.284137		S phase FLJ12888 hypothetical protein FLJ12888 Hs.284137 N68390
IMAGE:292270	N62475	25904	G2/M	FLJ12890 hypothetical protein FLJ12890 Hs.43299		G2/M FLJ12890 hypothetical protein FLJ12890 Hs.43299 N62475
IMAGE:785733	AA449357	64770	S phase	FLJ12892 hypothetical protein FLJ12892 Hs.17731		S phase FLJ12892 hypothetical protein FLJ12892 Hs.17731 AA449357
IMAGE:878440	AA670363	64770	S phase	FLJ12892 hypothetical protein FLJ12892 Hs.17731		S phase FLJ12892 hypothetical protein FLJ12892 Hs.17731 AA670363
IMAGE:1853497	AI243595	64770	S phase	FLJ12892 hypothetical protein FLJ12892 Hs.17731		S phase FLJ12892 hypothetical protein FLJ12892 Hs.17731 AI243595
IMAGE:120749	T95423		M/G1	FLJ13046 **hypothetical protein FLJ13046 similar to exportin 4 Hs.117102		M/G1 FLJ13046 **hypothetical protein FLJ13046 similar to exportin 4 Hs.117102 T95423
IMAGE:782306	AA431233	65055	S phase	FLJ13110 hypothetical protein FLJ13110 Hs.7358		S phase FLJ13110 hypothetical protein FLJ13110 Hs.7358 AA431233
IMAGE:1536236	AA923560	79650	M/G1	FLJ13154 hypothetical protein FLJ13154 Hs.25303		M/G1 FLJ13154 hypothetical protein FLJ13154 Hs.25303 AA923560
IMAGE:488149	AA057266	80263	S phase	FLJ13181 hypothetical protein FLJ13181 Hs.301526		S phase FLJ13181 hypothetical protein FLJ13181 Hs.301526 AA057266
IMAGE:1931664	AI333214	65250	S phase	FLJ13231 hypothetical protein FLJ13231 Hs.156148		S phase FLJ13231 hypothetical protein FLJ13231 Hs.156148 AI333214
IMAGE:418380	W92787	65250	S phase	FLJ13231 hypothetical protein FLJ13231 Hs.156148		S phase FLJ13231 hypothetical protein FLJ13231 Hs.156148 W92787
IMAGE:1035518	AA621725	79700	G1/S	FLJ13287 hypothetical protein FLJ13287 Hs.53263		G1/S FLJ13287 hypothetical protein FLJ13287 Hs.53263 AA621725
IMAGE:346308	W74133	64785	G1/S	FLJ13912 hypothetical protein FLJ13912 Hs.47125		G1/S FLJ13912 hypothetical protein FLJ13912 Hs.47125 W74133
IMAGE:111812	T91225	90417	G2/M	FLJ14502 TRAF4 associated factor 1 Hs.181466		G2/M FLJ14502 TRAF4 associated factor 1 Hs.181466 T91225
IMAGE:723930	AA292522	84904	G2	FLJ14642 hypothetical protein FLJ14642 Hs.245342		G2 FLJ14642 hypothetical protein FLJ14642 Hs.245342 AA292522
IMAGE:769944	AI732738	84904	G2	FLJ14642 hypothetical protein FLJ14642 Hs.245342		G2 FLJ14642 hypothetical protein FLJ14642 Hs.245342 AI732738
IMAGE:415064	W93120	84921	G1/S	FLJ14761 hypothetical protein FLJ14761 Hs.250848		G1/S FLJ14761 hypothetical protein FLJ14761 Hs.250848 W93120
IMAGE:1070324	AA780791	84930	S phase	FLJ14813 hypothetical protein FLJ14813 Hs.14014		S phase FLJ14813 hypothetical protein FLJ14813 Hs.14014 AA780791
IMAGE:246116	N52394	55599	G1/S	FLJ20008 hypothetical protein FLJ20008 Hs.14235		G1/S FLJ20008 hypothetical protein FLJ20008 Hs.14235 N52394
IMAGE:139635	R64228	55599	G1/S	FLJ20008 hypothetical protein FLJ20008 Hs.14235		G1/S FLJ20008 hypothetical protein FLJ20008 Hs.14235 R64228
IMAGE:302997	N91145	55602	S phase	FLJ20036 hypothetical protein FLJ20036 Hs.32922		S phase FLJ20036 hypothetical protein FLJ20036 Hs.32922 N91145
IMAGE:204179	H59154	55602	G1/S	FLJ20036 hypothetical protein FLJ20036 Hs.32922		G1/S FLJ20036 hypothetical protein FLJ20036 Hs.32922 H59154
IMAGE:250797	H96090	54793	G2	FLJ20038 hypothetical protein FLJ20038 Hs.72071		G2 FLJ20038 hypothetical protein FLJ20038 Hs.72071 H96090
IMAGE:782832	AA448268	54794	G2/M	FLJ20039 hypothetical protein FLJ20039 Hs.343877		G2/M FLJ20039 hypothetical protein FLJ20039 Hs.343877 AA448268
IMAGE:1011715	AA229966	54806	G2/M	FLJ20069 hypothetical protein FLJ20069 Hs.273294		G2/M FLJ20069 hypothetical protein FLJ20069 Hs.273294 AA229966
IMAGE:461699	AA682274	55608	G1/S	FLJ20093 hypothetical protein FLJ20093 Hs.172572		G1/S FLJ20093 hypothetical protein FLJ20093 Hs.172572 AA682274
IMAGE:436153	AA703249	55608	G1/S	FLJ20093 hypothetical protein FLJ20093 Hs.172572		G1/S FLJ20093 hypothetical protein FLJ20093 Hs.172572 AA703249
IMAGE:308446	W24963	54819	M/G1	FLJ20094 hypothetical protein FLJ20094 Hs.29700		M/G1 FLJ20094 hypothetical protein FLJ20094 Hs.29700 W24963
IMAGE:235179	H78675	56257	G2	FLJ20257 hypothetical protein FLJ20257 Hs.178011		G2 FLJ20257 hypothetical protein FLJ20257 Hs.178011 H78675
IMAGE:296797	N74086	54876	S phase	FLJ20280 hypothetical protein FLJ20280 Hs.270134		S phase FLJ20280 hypothetical protein FLJ20280 Hs.270134 N74086
IMAGE:590253	AA147792	55632	G2/M	FLJ20333 hypothetical protein FLJ20333 Hs.79828		G2/M FLJ20333 hypothetical protein FLJ20333 Hs.79828 AA147792
IMAGE:234045	H66982	55632	G2/M	FLJ20333 hypothetical protein FLJ20333 Hs.79828		G2/M FLJ20333 hypothetical protein FLJ20333 Hs.79828 H66982
IMAGE:134482	R27647	55632	G2/M	FLJ20333 hypothetical protein FLJ20333 Hs.79828		G2/M FLJ20333 hypothetical protein FLJ20333 Hs.79828 R27647
IMAGE:70030	T48761	55632	G2	FLJ20333 hypothetical protein FLJ20333 Hs.79828		G2 FLJ20333 hypothetical protein FLJ20333 Hs.79828 T48761
IMAGE:645565	AA204830		G2/M	FLJ20354 **hypothetical protein FLJ20354 Hs.133260		G2/M FLJ20354 **hypothetical protein FLJ20354 Hs.133260 AA204830
IMAGE:882355	AA676296	54908	G2/M	FLJ20364 hypothetical protein FLJ20364 Hs.32471		G2/M FLJ20364 hypothetical protein FLJ20364 Hs.32471 AA676296
IMAGE:767163	AA424663	55646	M/G1	FLJ20425 hypothetical protein FLJ20425 Hs.71040		M/G1 FLJ20425 hypothetical protein FLJ20425 Hs.71040 AA424663
IMAGE:246808	N53214	55655	G2	FLJ20510 hypothetical protein FLJ20510 Hs.6844		G2 FLJ20510 hypothetical protein FLJ20510 Hs.6844 N53214
IMAGE:549572	AA122393	54962	G1/S	FLJ20516 hypothetical protein FLJ20516 Hs.70811		G1/S FLJ20516 hypothetical protein FLJ20516 Hs.70811 AA122393
IMAGE:773345	AA425442		G1/S	FLJ20530 **hypothetical protein FLJ20530 Hs.279521		G1/S FLJ20530 **hypothetical protein FLJ20530 Hs.279521 AA425442
IMAGE:137242	R36152	54972	G2	FLJ20539 hypothetical protein FLJ20539 Hs.118552		G2 FLJ20539 hypothetical protein FLJ20539 Hs.118552 R36152
IMAGE:810661	AA463982	55658	G2/M	FLJ20552 hypothetical protein FLJ20552 Hs.69554		G2/M FLJ20552 hypothetical protein FLJ20552 Hs.69554 AA463982
IMAGE:784016	AA443698	55003	M/G1	FLJ20624 hypothetical protein FLJ20624 Hs.52256		M/G1 FLJ20624 hypothetical protein FLJ20624 Hs.52256 AA443698
IMAGE:810981	AA459420	55020	G2	FLJ20699 hypothetical protein FLJ20699 Hs.15125		G2 FLJ20699 hypothetical protein FLJ20699 Hs.15125 AA459420
IMAGE:50238	H16996	55048	M/G1	FLJ20847 hypothetical protein FLJ20847 Hs.13479		M/G1 FLJ20847 hypothetical protein FLJ20847 Hs.13479 H16996
IMAGE:758332	AA401234	79801	G2/M	FLJ22009 hypothetical protein FLJ22009 Hs.123253		G2/M FLJ22009 hypothetical protein FLJ22009 Hs.123253 AA401234
IMAGE:197512	H52062	64224	G2/M	FLJ22313 hypothetical protein FLJ22313 Hs.30211		G2/M FLJ22313 hypothetical protein FLJ22313 Hs.30211 H52062
IMAGE:1859573	AI199155	64773	G2	FLJ22376 hypothetical protein FLJ22376 Hs.29341		G2 FLJ22376 hypothetical protein FLJ22376 Hs.29341 AI199155
IMAGE:501778	AA127879	79768	G2	FLJ22557 hypothetical protein FLJ22557 Hs.106101		G2 FLJ22557 hypothetical protein FLJ22557 Hs.106101 AA127879
IMAGE:149743	R82741	79768	G2	FLJ22557 hypothetical protein FLJ22557 Hs.106101		G2 FLJ22557 hypothetical protein FLJ22557 Hs.106101 R82741
IMAGE:461465	AA705035	63899	S phase	FLJ22609 hypothetical protein FLJ22609 Hs.18740		S phase FLJ22609 hypothetical protein FLJ22609 Hs.18740 AA705035
IMAGE:824753	AA489007	79866	G2	FLJ22624 hypothetical protein FLJ22624 Hs.179566		G2 FLJ22624 hypothetical protein FLJ22624 Hs.179566 AA489007
IMAGE:325150	W48559	79830	G2/M	FLJ23151 hypothetical protein FLJ23151 Hs.137260		G2/M FLJ23151 hypothetical protein FLJ23151 Hs.137260 W48559
IMAGE:196569	R91639		G2	FLJ23293 **likely ortholog of mouse ADP-ribosylation-like factor 6 interacting protein 2 Hs.27099		G2 FLJ23293 **likely ortholog of mouse ADP-ribosylation-like factor 6 interacting protein 2 Hs.27099 R91639
IMAGE:743987	AA629027	64225	G2	FLJ23293 likely ortholog of mouse ADP-ribosylation-like factor 6 interacting protein 2 Hs.27099		G2 FLJ23293 likely ortholog of mouse ADP-ribosylation-like factor 6 interacting protein 2 Hs.27099 AA629027
IMAGE:220395	H87246	64225	G2	FLJ23293 likely ortholog of mouse ADP-ribosylation-like factor 6 interacting protein 2 Hs.27099		G2 FLJ23293 likely ortholog of mouse ADP-ribosylation-like factor 6 interacting protein 2 Hs.27099 H87246
IMAGE:297178	W03979	79733	S phase	FLJ23311 hypothetical protein FLJ23311 Hs.94292		S phase FLJ23311 hypothetical protein FLJ23311 Hs.94292 W03979
IMAGE:814769	AA455328	79682	S phase	FLJ23468 hypothetical protein FLJ23468 Hs.38178		S phase FLJ23468 hypothetical protein FLJ23468 Hs.38178 AA455328
IMAGE:795746	AA460299	79682	S phase	FLJ23468 hypothetical protein FLJ23468 Hs.38178		S phase FLJ23468 hypothetical protein FLJ23468 Hs.38178 AA460299
IMAGE:221092	H91734		G2	GABPB2 **GA-binding protein transcription factor, beta subunit 2 (47kD) Hs.278238		G2 GABPB2 **GA-binding protein transcription factor, beta subunit 2 (47kD) Hs.278238 H91734
IMAGE:1582149	AA971073	84057	G2	GAJ GAJ protein Hs.294088		G2 GAJ GAJ protein Hs.294088 AA971073
IMAGE:785897	AA449637	51512	G2/M	GTSE1 G-2 and S-phase expressed 1 Hs.122552		G2/M GTSE1 G-2 and S-phase expressed 1 Hs.122552 AA449637
IMAGE:2019372	AI369284	51512	G2/M	GTSE1 G-2 and S-phase expressed 1 Hs.122552		G2/M GTSE1 G-2 and S-phase expressed 1 Hs.122552 AI369284
IMAGE:359191	AA010110	26353	S phase	H11 protein kinase H11; small stress protein-like protein HSP22 Hs.111676		S phase H11 protein kinase H11; small stress protein-like protein HSP22 Hs.111676 AA010110
IMAGE:205049	H57494	26353	G1/S	H11 protein kinase H11; small stress protein-like protein HSP22 Hs.111676		G1/S H11 protein kinase H11; small stress protein-like protein HSP22 Hs.111676 H57494
IMAGE:205445	H59954	3005	S phase	H1F0 H1 histone family, member 0 Hs.226117		S phase H1F0 H1 histone family, member 0 Hs.226117 H59954
IMAGE:283919	N50797	8334	*S phase	H2AFL H2A histone family, member L Hs.28777		*S phase H2AFL H2A histone family, member L Hs.28777 N50797
IMAGE:1687138	AI095013	8336	*S phase	H2AFN H2A histone family, member N Hs.134999		*S phase H2AFN H2A histone family, member N Hs.134999 AI095013
IMAGE:256664	H95392	3014	G2	H2AFX H2A histone family, member X Hs.147097		G2 H2AFX H2A histone family, member X Hs.147097 H95392
IMAGE:214006	H70774	8347	*S phase	H2BFL H2B histone family, member L Hs.239884		*S phase H2BFL H2B histone family, member L Hs.239884 H70774
IMAGE:813149	AA456695	8349	M/G1	H2BFQ H2B histone family, member Q Hs.2178		M/G1 H2BFQ H2B histone family, member Q Hs.2178 AA456695
IMAGE:594693	AA165312	3022	*S phase	H4F2 H4 histone, family 2 Hs.55468		*S phase H4F2 H4 histone, family 2 Hs.55468 AA165312
IMAGE:1461138	AA868008	8364	S phase	H4FG H4 histone family, member G Hs.46423		S phase H4FG H4 histone family, member G Hs.46423 AA868008
IMAGE:447715	AA702781	8365	*S phase	H4FH H4 histone family, member H Hs.93758		*S phase H4FH H4 histone family, member H Hs.93758 AA702781
IMAGE:1842170	AI218900	8366	S phase	H4FI H4 histone family, member I Hs.143080		S phase H4FI H4 histone family, member I Hs.143080 AI218900
IMAGE:1842604	AI221390	8367	*S phase	H4FJ H4 histone family, member J Hs.240135		*S phase H4FJ H4 histone family, member J Hs.240135 AI221390
IMAGE:838662	AA457232	29115	S phase	HCNGP transcriptional regulator protein Hs.27299		S phase HCNGP transcriptional regulator protein Hs.27299 AA457232
IMAGE:290240	N92184	51574	M/G1	HDCMA18P HDCMA18P protein Hs.278635		M/G1 HDCMA18P HDCMA18P protein Hs.278635 N92184
IMAGE:1055762	AA628231	3070	S phase	HELLS helicase, lymphoid-specific Hs.203963		S phase HELLS helicase, lymphoid-specific Hs.203963 AA628231
IMAGE:308633	N95450	3070	S phase	HELLS helicase, lymphoid-specific Hs.203963		S phase HELLS helicase, lymphoid-specific Hs.203963 N95450
IMAGE:447509	AA702254	3111	M/G1	HLA-DNA major histocompatibility complex, class II, DN alpha Hs.11135		M/G1 HLA-DNA major histocompatibility complex, class II, DN alpha Hs.11135 AA702254
IMAGE:153411	R48091	3122	G2	HLA-DRA major histocompatibility complex, class II, DR alpha Hs.76807		G2 HLA-DRA major histocompatibility complex, class II, DR alpha Hs.76807 R48091
IMAGE:363103	AA019203	3148	G2	HMG2 high-mobility group (nonhistone chromosomal) protein 2 Hs.80684		G2 HMG2 high-mobility group (nonhistone chromosomal) protein 2 Hs.80684 AA019203
IMAGE:204111	H61884	80273	M/G1	HMGE GrpE-like protein cochaperone Hs.151903		M/G1 HMGE GrpE-like protein cochaperone Hs.151903 H61884
IMAGE:610362	AA171715		G2/M	HMMR **hyaluronan-mediated motility receptor (RHAMM) Hs.72550		G2/M HMMR **hyaluronan-mediated motility receptor (RHAMM) Hs.72550 AA171715
IMAGE:795803	AA460509	51155	G2/M	HN1 hematological and neurological expressed 1 Hs.109706		G2/M HN1 hematological and neurological expressed 1 Hs.109706 AA460509
IMAGE:471568	AA035429	51155	G2	HN1 hematological and neurological expressed 1 Hs.109706		G2 HN1 hematological and neurological expressed 1 Hs.109706 AA035429
IMAGE:1534155	AA918749	3214	G1/S	HOXB4 homeo box B4 Hs.126666		G1/S HOXB4 homeo box B4 Hs.126666 AA918749
IMAGE:264127	N28983	50809	G2/M	HP1-BP74 HP1-BP74 Hs.142442		G2/M HP1-BP74 HP1-BP74 Hs.142442 N28983
IMAGE:898084	AA598791	50809	G2	HP1-BP74 HP1-BP74 Hs.142442		G2 HP1-BP74 HP1-BP74 Hs.142442 AA598791
IMAGE:233365	H79795	50809	G2	HP1-BP74 HP1-BP74 Hs.142442		G2 HP1-BP74 HP1-BP74 Hs.142442 H79795
IMAGE:111571	T84669	50809	G2	HP1-BP74 HP1-BP74 Hs.142442		G2 HP1-BP74 HP1-BP74 Hs.142442 T84669
IMAGE:50615	H17513	3305	G2/M	HSPA1L heat shock 70kD protein-like 1 Hs.80288		G2/M HSPA1L heat shock 70kD protein-like 1 Hs.80288 H17513
IMAGE:951287	AA620511	3312	M/G1	HSPA8 heat shock 70kD protein 8 Hs.180414		M/G1 HSPA8 heat shock 70kD protein 8 Hs.180414 AA620511
IMAGE:209383	H64096	3312	M/G1	HSPA8 heat shock 70kD protein 8 Hs.180414		M/G1 HSPA8 heat shock 70kD protein 8 Hs.180414 H64096
IMAGE:884719	AA629567	3312	G2/M	HSPA8 heat shock 70kD protein 8 Hs.180414		G2/M HSPA8 heat shock 70kD protein 8 Hs.180414 AA629567
IMAGE:33874	R23666	51503	M/G1	HSPC148 hypothetical protein Hs.42743		M/G1 HSPC148 hypothetical protein Hs.42743 R23666
IMAGE:796469	AA460432	29089	S phase	HSPC150 HSPC150 protein similar to ubiquitin-conjugating enzyme Hs.5199		S phase HSPC150 HSPC150 protein similar to ubiquitin-conjugating enzyme Hs.5199 AA460432
IMAGE:1594172	AI791736	29089	S phase	HSPC150 HSPC150 protein similar to ubiquitin-conjugating enzyme Hs.5199		S phase HSPC150 HSPC150 protein similar to ubiquitin-conjugating enzyme Hs.5199 AI791736
IMAGE:264162	N20480	29092	S phase	HSPC157 HSPC157 protein Hs.279842		S phase HSPC157 HSPC157 protein Hs.279842 N20480
IMAGE:510272	AA053139	29097	M/G1	HSPC163 HSPC163 protein Hs.108854		M/G1 HSPC163 HSPC163 protein Hs.108854 AA053139
IMAGE:261393	H98963	29097	M/G1	HSPC163 HSPC163 protein Hs.108854		M/G1 HSPC163 HSPC163 protein Hs.108854 H98963
IMAGE:144902	R78498	51524	M/G1	HSPC196 hypothetical protein Hs.239938		M/G1 HSPC196 hypothetical protein Hs.239938 R78498
IMAGE:210982	H66023	51524	G2/M	HSPC196 hypothetical protein Hs.239938		G2/M HSPC196 hypothetical protein Hs.239938 H66023
IMAGE:263342	H99997	51526	S phase	HSPC207 hypothetical protein Hs.75798		S phase HSPC207 hypothetical protein Hs.75798 H99997
IMAGE:115443	T87442	51530	G2/M	HSPC216 hypothetical protein Hs.13525		G2/M HSPC216 hypothetical protein Hs.13525 T87442
IMAGE:308026	AI734268	51534	G2	HSPC228 hypothetical protein Hs.267288		G2 HSPC228 hypothetical protein Hs.267288 AI734268
IMAGE:278483	N98655	55556	S phase	HSRTSBETA rTS beta protein Hs.180433		S phase HSRTSBETA rTS beta protein Hs.180433 N98655
IMAGE:815059	AA465172	29896	G1/S	HSU53209 transformer-2 alpha (htra-2 alpha) Hs.24937		G1/S HSU53209 transformer-2 alpha (htra-2 alpha) Hs.24937 AA465172
IMAGE:594172	AA169496	84571	S phase	HT023 hypothetical protein HT023 Hs.237225		S phase HT023 hypothetical protein HT023 Hs.237225 AA169496
IMAGE:50288	H17888	27037	G2	HTF9C HpaII tiny fragments locus 9C Hs.63609		G2 HTF9C HpaII tiny fragments locus 9C Hs.63609 H17888
IMAGE:200302	R96881	27037	G1/S	HTF9C HpaII tiny fragments locus 9C Hs.63609		G1/S HTF9C HpaII tiny fragments locus 9C Hs.63609 R96881
IMAGE:32309	R42713	91734	G2/M	IDI2 diphosphate dimethylallyl diphosphate isomerase 2 Hs.9270		G2/M IDI2 diphosphate dimethylallyl diphosphate isomerase 2 Hs.9270 R42713
IMAGE:278658	W01389	25836	G2	IDN3 IDN3 protein Hs.225767		G2 IDN3 IDN3 protein Hs.225767 W01389
IMAGE:588840	AA209430		S phase	IFIT1 **interferon-induced protein with tetratricopeptide repeats 1 Hs.20315		S phase IFIT1 **interferon-induced protein with tetratricopeptide repeats 1 Hs.20315 AA209430
IMAGE:544502	AA075011	3434	M/G1	IFIT1 interferon-induced protein with tetratricopeptide repeats 1 Hs.20315		M/G1 IFIT1 interferon-induced protein with tetratricopeptide repeats 1 Hs.20315 AA075011
IMAGE:823696	AA489640	3434	M/G1	IFIT1 interferon-induced protein with tetratricopeptide repeats 1 Hs.20315		M/G1 IFIT1 interferon-induced protein with tetratricopeptide repeats 1 Hs.20315 AA489640
IMAGE:839048	AA487505	23705	G2/M	IGSF4 immunoglobulin superfamily, member 4 Hs.70337		G2/M IGSF4 immunoglobulin superfamily, member 4 Hs.70337 AA487505
IMAGE:242952	H95712	3608	M/G1	ILF2 interleukin enhancer binding factor 2, 45kD Hs.75117		M/G1 ILF2 interleukin enhancer binding factor 2, 45kD Hs.75117 H95712
IMAGE:428338	AA005153	10207	G2/M	INADL PDZ domain protein (Drosophila inaD-like) Hs.321197		G2/M INADL PDZ domain protein (Drosophila inaD-like) Hs.321197 AA005153
IMAGE:753198	AA406456	83879	G1/S	JPO1 c-Myc target JPO1 Hs.333893		G1/S JPO1 c-Myc target JPO1 Hs.333893 AA406456
IMAGE:244058	N38809	83879	G1/S	JPO1 c-Myc target JPO1 Hs.333893		G1/S JPO1 c-Myc target JPO1 Hs.333893 N38809
IMAGE:686172	AA262212	9787	G2/M	KIAA0008 KIAA0008 gene product Hs.77695		G2/M KIAA0008 KIAA0008 gene product Hs.77695 AA262212
IMAGE:357373	W93717	9787	G2/M	KIAA0008 KIAA0008 gene product Hs.77695		G2/M KIAA0008 KIAA0008 gene product Hs.77695 W93717
IMAGE:278243	N63575	9824	G2	KIAA0013 KIAA0013 gene product Hs.172652		G2 KIAA0013 KIAA0013 gene product Hs.172652 N63575
IMAGE:882497	AA676604	9643	M/G1	KIAA0026 MORF-related gene X Hs.173714		M/G1 KIAA0026 MORF-related gene X Hs.173714 AA676604
IMAGE:739983	AA477501	9928	G2/M	KIAA0042 KIAA0042 gene product Hs.3104		G2/M KIAA0042 KIAA0042 gene product Hs.3104 AA477501
IMAGE:770066	AA430546	23310	G2	KIAA0056 KIAA0056 protein Hs.13421		G2 KIAA0056 KIAA0056 protein Hs.13421 AA430546
IMAGE:244767	N54344	23397	G2	KIAA0074 KIAA0074 protein Hs.1192		G2 KIAA0074 KIAA0074 protein Hs.1192 N54344
IMAGE:898032	AA598942	9793	G2/M	KIAA0097 KIAA0097 gene product Hs.76989		G2/M KIAA0097 KIAA0097 gene product Hs.76989 AA598942
IMAGE:342640	W68219	9768	S phase	KIAA0101 KIAA0101 gene product Hs.81892		S phase KIAA0101 KIAA0101 gene product Hs.81892 W68219
IMAGE:770837	AA434305	23178	G1/S	KIAA0135 KIAA0135 protein Hs.79337		G1/S KIAA0135 KIAA0135 protein Hs.79337 AA434305
IMAGE:587010	AA133685	9646	M/G1	KIAA0155 KIAA0155 gene product Hs.173288		M/G1 KIAA0155 KIAA0155 gene product Hs.173288 AA133685
IMAGE:173309	H21107	9774	G2	KIAA0164 KIAA0164 gene product Hs.80338		G2 KIAA0164 KIAA0164 gene product Hs.80338 H21107
IMAGE:1416055	AA948058	9700	G2	KIAA0165 extra spindle poles, S. cerevisiae, homolog of Hs.153479		G2 KIAA0165 extra spindle poles, S. cerevisiae, homolog of Hs.153479 AA948058
IMAGE:212704	H68789	9656	G2/M	KIAA0170 KIAA0170 gene product Hs.277585		G2/M KIAA0170 KIAA0170 gene product Hs.277585 H68789
IMAGE:1517595	AA903137	9833	G2	KIAA0175 likely ortholog of maternal embryonic leucine zipper kinase Hs.184339		G2 KIAA0175 likely ortholog of maternal embryonic leucine zipper kinase Hs.184339 AA903137
IMAGE:34616	R44371	23510	G2/M	KIAA0176 KIAA0176 protein Hs.4935		G2/M KIAA0176 KIAA0176 protein Hs.4935 R44371
IMAGE:1655729	AI023801	23199	M/G1	KIAA0182 KIAA0182 protein Hs.75909		M/G1 KIAA0182 KIAA0182 protein Hs.75909 AI023801
IMAGE:43977	H05099	23199	G2/M	KIAA0182 KIAA0182 protein Hs.75909		G2/M KIAA0182 KIAA0182 protein Hs.75909 H05099
IMAGE:565758	AA135971	23279	S phase	KIAA0197 KIAA0197 protein Hs.22559		S phase KIAA0197 KIAA0197 protein Hs.22559 AA135971
IMAGE:809779	AA454740	23338	G2/M	KIAA0239 KIAA0239 protein Hs.9729		G2/M KIAA0239 KIAA0239 protein Hs.9729 AA454740
IMAGE:811067	AA485621	23152	M/G1	KIAA0306 KIAA0306 protein Hs.306117		M/G1 KIAA0306 KIAA0306 protein Hs.306117 AA485621
IMAGE:49162	H16635	23152	G2	KIAA0306 KIAA0306 protein Hs.306117		G2 KIAA0306 KIAA0306 protein Hs.306117 H16635
IMAGE:29030	R40377	23152	G1/S	KIAA0306 KIAA0306 protein Hs.306117		G1/S KIAA0306 KIAA0306 protein Hs.306117 R40377
IMAGE:241113	H91438		G2	KIAA0480 **KIAA0480 gene product Hs.92200		G2 KIAA0480 **KIAA0480 gene product Hs.92200 H91438
IMAGE:1506140	AA905278	9786	M/G1	KIAA0586 KIAA0586 gene product Hs.77724		M/G1 KIAA0586 KIAA0586 gene product Hs.77724 AA905278
IMAGE:239958	H82035	9883	G2/M	KIAA0618 KIAA0618 gene product Hs.295112		G2/M KIAA0618 KIAA0618 gene product Hs.295112 H82035
IMAGE:810008	AA455209	9666	G2/M	KIAA0675 KIAA0675 gene product Hs.165662		G2/M KIAA0675 KIAA0675 gene product Hs.165662 AA455209
IMAGE:366522	AA026752	9682	G2	KIAA0677 KIAA0677 gene product Hs.155983		G2 KIAA0677 KIAA0677 gene product Hs.155983 AA026752
IMAGE:340742	W55875	23255	G2	KIAA0802 KIAA0802 protein Hs.27657		G2 KIAA0802 KIAA0802 protein Hs.27657 W55875
IMAGE:32820	R43640	23354	S phase	KIAA0841 KIAA0841 protein Hs.7426		S phase KIAA0841 KIAA0841 protein Hs.7426 R43640
IMAGE:489798	AA099819	23015	S phase	KIAA0855 golgin-67 Hs.182982		S phase KIAA0855 golgin-67 Hs.182982 AA099819
IMAGE:712166	AA280248	23015	S phase	KIAA0855 golgin-67 Hs.182982		S phase KIAA0855 golgin-67 Hs.182982 AA280248
IMAGE:815550	AA456818	23015	S phase	KIAA0855 golgin-67 Hs.182982		S phase KIAA0855 golgin-67 Hs.182982 AA456818
1276380	AA694481	23015	S phase	KIAA0855 golgin-67 Hs.182982		S phase KIAA0855 golgin-67 Hs.182982 AA694481
IMAGE:378032	AA775625	23015	S phase	KIAA0855 golgin-67 Hs.182982		S phase KIAA0855 golgin-67 Hs.182982 AA775625
IMAGE:2238788	AI636699	23015	S phase	KIAA0855 golgin-67 Hs.182982		S phase KIAA0855 golgin-67 Hs.182982 AI636699
IMAGE:49356	H15101	23015	S phase	KIAA0855 golgin-67 Hs.182982		S phase KIAA0855 golgin-67 Hs.182982 H15101
IMAGE:26171	R12847	23312	S phase	KIAA0856 KIAA0856 protein Hs.13264		S phase KIAA0856 KIAA0856 protein Hs.13264 R12847
IMAGE:950450	AA599094	22836	S phase	KIAA0878 KIAA0878 protein Hs.10432		S phase KIAA0878 KIAA0878 protein Hs.10432 AA599094
IMAGE:195960	R92643	23077	S phase	KIAA0916 KIAA0916 protein Hs.151411		S phase KIAA0916 KIAA0916 protein Hs.151411 R92643
IMAGE:811918	AA454989	22903	M/G1	KIAA0952 KIAA0952 protein Hs.7935		M/G1 KIAA0952 KIAA0952 protein Hs.7935 AA454989
IMAGE:840471	AA485878	23393	G2/M	KIAA0978 KIAA0978 protein Hs.3686		G2/M KIAA0978 KIAA0978 protein Hs.3686 AA485878
IMAGE:284583	N64780	23393	G2/M	KIAA0978 KIAA0978 protein Hs.3686		G2/M KIAA0978 KIAA0978 protein Hs.3686 N64780
IMAGE:1474690	AA857017	23393	G2	KIAA0978 KIAA0978 protein Hs.3686		G2 KIAA0978 KIAA0978 protein Hs.3686 AA857017
IMAGE:1455600	AA863115	22894	G1/S	KIAA1008 KIAA1008 protein Hs.323346		G1/S KIAA1008 KIAA1008 protein Hs.323346 AA863115
IMAGE:502496	AA156951	22909	G2	KIAA1018 KIAA1018 protein Hs.5400		G2 KIAA1018 KIAA1018 protein Hs.5400 AA156951
IMAGE:754311	AA479402	57181	M/G1	KIAA1265 KIAA1265 protein Hs.74313		M/G1 KIAA1265 KIAA1265 protein Hs.74313 AA479402
IMAGE:321886	W37627	54532	G1/S	KIAA1350 KIAA1350 protein Hs.101799		G1/S KIAA1350 KIAA1350 protein Hs.101799 W37627
IMAGE:133454	R27457	54407	S phase	KIAA1382 amino acid transporter 2 Hs.298275		S phase KIAA1382 amino acid transporter 2 Hs.298275 R27457
IMAGE:345056	W72798	57169	M/G1	KIAA1404 KIAA1404 protein Hs.200317		M/G1 KIAA1404 KIAA1404 protein Hs.200317 W72798
IMAGE:1851004	AI248987	57650	G2	KIAA1524 KIAA1524 protein Hs.151343		G2 KIAA1524 KIAA1524 protein Hs.151343 AI248987
IMAGE:490971	AA136692	57668	M/G1	KIAA1547 KIAA1547 protein Hs.31305		M/G1 KIAA1547 KIAA1547 protein Hs.31305 AA136692
IMAGE:321574	W32778	57668	G2/M	KIAA1547 KIAA1547 protein Hs.31305		G2/M KIAA1547 KIAA1547 protein Hs.31305 W32778
IMAGE:1034483	AA779733	57691	G1/S	KIAA1586 KIAA1586 protein Hs.180663		G1/S KIAA1586 KIAA1586 protein Hs.180663 AA779733
IMAGE:1574074	AA938639	57691	G1/S	KIAA1586 KIAA1586 protein Hs.180663		G1/S KIAA1586 KIAA1586 protein Hs.180663 AA938639
IMAGE:50383	H17868	57698	S phase	KIAA1598 KIAA1598 protein Hs.23740		S phase KIAA1598 KIAA1598 protein Hs.23740 H17868
IMAGE:203268	H54592	80817	G2	KIAA1712 KIAA1712 protein Hs.29798		G2 KIAA1712 KIAA1712 protein Hs.29798 H54592
IMAGE:152617	R49810	80855	S phase	KIAA1716 KIAA1716 protein Hs.21446		S phase KIAA1716 KIAA1716 protein Hs.21446 R49810
IMAGE:292933	N69491	3833	G2	KNSL2 kinesin-like 2 Hs.20830		G2 KNSL2 kinesin-like 2 Hs.20830 N69491
IMAGE:129961	R19267	3833	G2	KNSL2 kinesin-like 2 Hs.20830		G2 KNSL2 kinesin-like 2 Hs.20830 R19267
IMAGE:489489	AA099136	3930	G2/M	LBR lamin B receptor Hs.152931		G2/M LBR lamin B receptor Hs.152931 AA099136
IMAGE:366763	AA029331	57189	G1/S	LCHN LCHN protein Hs.12461		G1/S LCHN LCHN protein Hs.12461 AA029331
IMAGE:810217	AA464698	79162	G1/S	LENG8 leukocyte receptor cluster (LRC) member 8 Hs.306121		G1/S LENG8 leukocyte receptor cluster (LRC) member 8 Hs.306121 AA464698
IMAGE:1591599	AA983462	4001	G2	LMNB1 lamin B1 Hs.89497		G2 LMNB1 lamin B1 Hs.89497 AA983462
IMAGE:200307	R96804	114223	M/G1	LOC114223 hypothetical protein Hs.323562		M/G1 LOC114223 hypothetical protein Hs.323562 R96804
IMAGE:843314	AA489556	51003	G1/S	LOC51003 CGI-125 protein Hs.27289		G1/S LOC51003 CGI-125 protein Hs.27289 AA489556
IMAGE:431001	AA677920	51004	G2	LOC51004 CGI-10 protein Hs.12239		G2 LOC51004 CGI-10 protein Hs.12239 AA677920
IMAGE:243477	N33610	51055	G1/S	LOC51055 unknown Hs.202694		G1/S LOC51055 unknown Hs.202694 N33610
IMAGE:487087	AA045414	51141	S phase	LOC51141 insulin induced protein 2 Hs.7089		S phase LOC51141 insulin induced protein 2 Hs.7089 AA045414
IMAGE:300276	N79745	51170	M/G1	LOC51170 retinal short-chain dehydrogenase/reductase retSDR2 Hs.12150		M/G1 LOC51170 retinal short-chain dehydrogenase/reductase retSDR2 Hs.12150 N79745
IMAGE:321693	W33133	51174	G2	LOC51174 delta-tubulin Hs.270847		G2 LOC51174 delta-tubulin Hs.270847 W33133
IMAGE:813604	AA447679		G1/S	LOC51218 **clone FLB4739 Hs.294083		G1/S LOC51218 **clone FLB4739 Hs.294083 AA447679
IMAGE:1605155	AA988037	51240	G1/S	LOC51240 hypothetical protein Hs.7870		G1/S LOC51240 hypothetical protein Hs.7870 AA988037
IMAGE:141361	R63841	51334	M/G1	LOC51334 mesenchymal stem cell protein DSC54 Hs.157461		M/G1 LOC51334 mesenchymal stem cell protein DSC54 Hs.157461 R63841
IMAGE:491486	AA150301		M/G1	LOC51578 **adrenal gland protein AD-004 Hs.279586		M/G1 LOC51578 **adrenal gland protein AD-004 Hs.279586 AA150301
IMAGE:1600239	AA961752	51659	G1/S	LOC51659 HSPC037 protein Hs.108196		G1/S LOC51659 HSPC037 protein Hs.108196 AA961752
IMAGE:773106	AA425475	51700	G2	LOC51700 cytochrome b5 reductase b5R.2 Hs.22142		G2 LOC51700 cytochrome b5 reductase b5R.2 Hs.22142 AA425475
IMAGE:43461	H05934	54104	G1/S	LOC54104 hypothetical protein Hs.12871		G1/S LOC54104 hypothetical protein Hs.12871 H05934
IMAGE:484933	AA037466		M/G1	LOC56996 **cation-chloride cotransporter-interacting protein Hs.119178		M/G1 LOC56996 **cation-chloride cotransporter-interacting protein Hs.119178 AA037466
IMAGE:50302	H17272	57168	G2/M	LOC57168 similar to aspartate beta hydroxylase (ASPH) Hs.184390		G2/M LOC57168 similar to aspartate beta hydroxylase (ASPH) Hs.184390 H17272
IMAGE:854843	AA630256	58486	S phase	LOC58486 transposon-derived Buster1 transposase-like protein Hs.25726		S phase LOC58486 transposon-derived Buster1 transposase-like protein Hs.25726 AA630256
IMAGE:1461141	AA868020	58486	S phase	LOC58486 transposon-derived Buster1 transposase-like protein Hs.25726		S phase LOC58486 transposon-derived Buster1 transposase-like protein Hs.25726 AA868020
IMAGE:488435	AA047443	4026	G2/M	LPP LIM domain-containing preferred translocation partner in lipoma Hs.180398		G2/M LPP LIM domain-containing preferred translocation partner in lipoma Hs.180398 AA047443
IMAGE:111981	T91807		G1/S	LRRFIP1 **leucine rich repeat (in FLII) interacting protein 1 Hs.326159		G1/S LRRFIP1 **leucine rich repeat (in FLII) interacting protein 1 Hs.326159 T91807
IMAGE:42831	R60197		G2	LTBP3 **latent transforming growth factor beta binding protein 3 Hs.289019		G2 LTBP3 **latent transforming growth factor beta binding protein 3 Hs.289019 R60197
IMAGE:730633	AA411969		G1/S	LUC7A **cisplatin resistance-associated overexpressed protein Hs.3688		G1/S LUC7A **cisplatin resistance-associated overexpressed protein Hs.3688 AA411969
IMAGE:366100	AA071473	4147	G2/M	MATN2 matrilin 2 Hs.19368		G2/M MATN2 matrilin 2 Hs.19368 AA071473
IMAGE:855390	AA663995	4175	G1/S	MCM6 minichromosome maintenance deficient (mis5, S. pombe) 6 Hs.155462		G1/S MCM6 minichromosome maintenance deficient (mis5, S. pombe) 6 Hs.155462 AA663995
IMAGE:1587847	AA976533	4175	G1/S	MCM6 minichromosome maintenance deficient (mis5, S. pombe) 6 Hs.155462		G1/S MCM6 minichromosome maintenance deficient (mis5, S. pombe) 6 Hs.155462 AA976533
IMAGE:246659	N59689	4175	G1/S	MCM6 minichromosome maintenance deficient (mis5, S. pombe) 6 Hs.155462		G1/S MCM6 minichromosome maintenance deficient (mis5, S. pombe) 6 Hs.155462 N59689
IMAGE:1858169	AI225067	60492	G2/M	MDS025 hypothetical protein MDS025 Hs.154938		G2/M MDS025 hypothetical protein MDS025 Hs.154938 AI225067
IMAGE:251330	H97880	84313	G2	MGC10540 hypothetical protein MGC10540 Hs.108824		G2 MGC10540 hypothetical protein MGC10540 Hs.108824 H97880
IMAGE:178255	H46748	84736	M/G1	MGC10850 hypothetical protein MGC10850 Hs.117715		M/G1 MGC10850 hypothetical protein MGC10850 Hs.117715 H46748
IMAGE:625693	AA186460	84262	G2/M	MGC10911 hypothetical protein MGC10911 Hs.85573		G2/M MGC10911 hypothetical protein MGC10911 Hs.85573 AA186460
IMAGE:842925	AA489297	84305	G2/M	MGC13064 hypothetical protein MGC13064 Hs.333524		G2/M MGC13064 hypothetical protein MGC13064 Hs.333524 AA489297
IMAGE:292171	N79167	83695	G2	MGC13204 hypothetical protein MGC13204 Hs.157148		G2 MGC13204 hypothetical protein MGC13204 Hs.157148 N79167
IMAGE:186982	H43437	84986	G2/M	MGC14258 hypothetical protein MGC14258 Hs.80305		G2/M MGC14258 hypothetical protein MGC14258 Hs.80305 H43437
IMAGE:773373	AA427792	84986	G2	MGC14258 hypothetical protein MGC14258 Hs.80305		G2 MGC14258 hypothetical protein MGC14258 Hs.80305 AA427792
IMAGE:121270	T96830	91433	G2	MGC14386 similar to cyclin-E binding protein 1 (H. sapiens) Hs.14870		G2 MGC14386 similar to cyclin-E binding protein 1 (H. sapiens) Hs.14870 T96830
1292105	AA707598	84961	G1/S	MGC15482 hypothetical protein MGC15482 Hs.194498		G1/S MGC15482 hypothetical protein MGC15482 Hs.194498 AA707598
IMAGE:1473682	AA916726	84330	G1/S	MGC15716 hypothetical protein MGC15716 Hs.332563		G1/S MGC15716 hypothetical protein MGC15716 Hs.332563 AA916726
IMAGE:743588	AA609463	91673	M/G1	MGC19556 hypothetical protein MGC19556 Hs.334787		M/G1 MGC19556 hypothetical protein MGC19556 Hs.334787 AA609463
IMAGE:843091	AA486011	93323	G2	MGC20533 similar to RIKEN cDNA 2410004L22 gene (M. musculus) Hs.69280		G2 MGC20533 similar to RIKEN cDNA 2410004L22 gene (M. musculus) Hs.69280 AA486011
IMAGE:149809	H00625		M/G1	MGC2306 **hypothetical protein MGC2306 Hs.760		M/G1 MGC2306 **hypothetical protein MGC2306 Hs.760 H00625
IMAGE:135688	R32406	84724	M/G1	MGC2306 hypothetical protein MGC2306 Hs.760		M/G1 MGC2306 hypothetical protein MGC2306 Hs.760 R32406
IMAGE:743810	AA634371	83461	G2/M	MGC2577 hypothetical protein MGC2577 Hs.30114		G2/M MGC2577 hypothetical protein MGC2577 Hs.30114 AA634371
IMAGE:838774	AA457566	92815	*S phase	MGC3165 similar to H2A histone family, member A (H. sapiens) Hs.348495		*S phase MGC3165 similar to H2A histone family, member A (H. sapiens) Hs.348495 AA457566
IMAGE:810519	AA464643	84245	G1/S	MGC3207 hypothetical protein MGC3207 Hs.13075		G1/S MGC3207 hypothetical protein MGC3207 Hs.13075 AA464643
IMAGE:1858786	AI224867	79149	M/G1	MGC4161 hypothetical protein MGC4161 Hs.177688		M/G1 MGC4161 hypothetical protein MGC4161 Hs.177688 AI224867
IMAGE:562067	AA211524	83745	M/G1	MGC4604 hypothetical protein MGC4604 Hs.284123		M/G1 MGC4604 hypothetical protein MGC4604 Hs.284123 AA211524
IMAGE:123614	R00846	83541	G2	MGC4675 hypothetical protein MGC4675 Hs.19002		G2 MGC4675 hypothetical protein MGC4675 Hs.19002 R00846
IMAGE:138255	R56840	84515	S phase	MGC4816 hypothetical protein MGC4816 Hs.88959		S phase MGC4816 hypothetical protein MGC4816 Hs.88959 R56840
IMAGE:358052	W95197	84515	G1/S	MGC4816 hypothetical protein MGC4816 Hs.88959		G1/S MGC4816 hypothetical protein MGC4816 Hs.88959 W95197
IMAGE:1735742	AI139629	84325	S phase	MGC5254 hypothetical protein MGC5254 Hs.222088		S phase MGC5254 hypothetical protein MGC5254 Hs.222088 AI139629
IMAGE:243878	N39195	79070	S phase	MGC5302 endoplasmic reticulum resident protein 58; hypothetical protein MGC5302 Hs.44970		S phase MGC5302 endoplasmic reticulum resident protein 58; hypothetical protein MGC5302 Hs.44970 N39195
IMAGE:811832	AA463627	79028	M/G1	MGC5338 hypothetical protein MGC5338 Hs.99598		M/G1 MGC5338 hypothetical protein MGC5338 Hs.99598 AA463627
IMAGE:186887	R83260	79028	M/G1	MGC5338 hypothetical protein MGC5338 Hs.99598		M/G1 MGC5338 hypothetical protein MGC5338 Hs.99598 R83260
IMAGE:1637791	AI002036	81611	M/G1	MGC5350 hypothetical protein MGC5350 Hs.71331		M/G1 MGC5350 hypothetical protein MGC5350 Hs.71331 AI002036
IMAGE:587992	AA130595	81611	G2/M	MGC5350 hypothetical protein MGC5350 Hs.71331		G2/M MGC5350 hypothetical protein MGC5350 Hs.71331 AA130595
IMAGE:856388	AA774678	81611	G2/M	MGC5350 hypothetical protein MGC5350 Hs.71331		G2/M MGC5350 hypothetical protein MGC5350 Hs.71331 AA774678
IMAGE:1579997	AA934904	79075	S phase	MGC5528 hypothetical protein MGC5528 Hs.315167		S phase MGC5528 hypothetical protein MGC5528 Hs.315167 AA934904
IMAGE:1394099	AA843451	79075	G1/S	MGC5528 hypothetical protein MGC5528 Hs.315167		G1/S MGC5528 hypothetical protein MGC5528 Hs.315167 AA843451
IMAGE:194318	H50655	79023	M/G1	MGC5585 hypothetical protein MGC5585 Hs.5152		M/G1 MGC5585 hypothetical protein MGC5585 Hs.5152 H50655
IMAGE:293727	N69694	79019	S phase	MGC861 hypothetical protein MGC861 Hs.208912		S phase MGC861 hypothetical protein MGC861 Hs.208912 N69694
IMAGE:278570	N99168	4286	S phase	MITF microphthalmia-associated transcription factor Hs.166017		S phase MITF microphthalmia-associated transcription factor Hs.166017 N99168
IMAGE:827144	AA521243	9801	M/G1	MRPL19 mitochondrial ribosomal protein L19 Hs.75574		M/G1 MRPL19 mitochondrial ribosomal protein L19 Hs.75574 AA521243
IMAGE:592491	AA160583	28973	M/G1	MRPS18B mitochondrial ribosomal protein S18B Hs.274417		M/G1 MRPS18B mitochondrial ribosomal protein S18B Hs.274417 AA160583
IMAGE:810979	AA459419	51116	M/G1	MRPS2 mitochondrial ribosomal protein S2 Hs.20776		M/G1 MRPS2 mitochondrial ribosomal protein S2 Hs.20776 AA459419
IMAGE:1156515	AI792246		G1/S	MSH2 **mutS (E. coli) homolog 2 (colon cancer, nonpolyposis type 1) Hs.78934		G1/S MSH2 **mutS (E. coli) homolog 2 (colon cancer, nonpolyposis type 1) Hs.78934 AI792246
IMAGE:840687	AA486365	4582	G2	MUC1 mucin 1, transmembrane Hs.89603		G2 MUC1 mucin 1, transmembrane Hs.89603 AA486365
IMAGE:82173	T68917	28955	M/G1	MYLE MYLE protein Hs.11902		M/G1 MYLE MYLE protein Hs.11902 T68917
IMAGE:843249	AA486027	4664	S phase	NAB1 NGFI-A binding protein 1 (EGR1 binding protein 1) Hs.107474		S phase NAB1 NGFI-A binding protein 1 (EGR1 binding protein 1) Hs.107474 AA486027
IMAGE:2338271	AI912047	4774	M/G1	NFIA nuclear factor I/A Hs.173933		M/G1 NFIA nuclear factor I/A Hs.173933 AI912047
IMAGE:704420	AA279667	4820	G1/S	NKTR natural killer-tumor recognition sequence Hs.241493		G1/S NKTR natural killer-tumor recognition sequence Hs.241493 AA279667
IMAGE:85840	T72235	4837	G2	NNMT nicotinamide N-methyltransferase Hs.76669		G2 NNMT nicotinamide N-methyltransferase Hs.76669 T72235
IMAGE:701625	AA284172	4863	G1/S	NPAT nuclear protein, ataxia-telangiectasia locus Hs.89385		G1/S NPAT nuclear protein, ataxia-telangiectasia locus Hs.89385 AA284172
IMAGE:591095	AA158346	64710	M/G1	NUCKS similar to rat nuclear ubiquitous casein kinase 2 Hs.118064		M/G1 NUCKS similar to rat nuclear ubiquitous casein kinase 2 Hs.118064 AA158346
IMAGE:1862607	AI053436	64710	M/G1	NUCKS similar to rat nuclear ubiquitous casein kinase 2 Hs.118064		M/G1 NUCKS similar to rat nuclear ubiquitous casein kinase 2 Hs.118064 AI053436
IMAGE:1540418	AA927182	64710	G2	NUCKS similar to rat nuclear ubiquitous casein kinase 2 Hs.118064		G2 NUCKS similar to rat nuclear ubiquitous casein kinase 2 Hs.118064 AA927182
IMAGE:810947	AA459619	54820	G2/M	NUDE1 LIS1-interacting protein NUDE1, rat homolog Hs.263925		G2/M NUDE1 LIS1-interacting protein NUDE1, rat homolog Hs.263925 AA459619
IMAGE:302080	N79612	54820	G2/M	NUDE1 LIS1-interacting protein NUDE1, rat homolog Hs.263925		G2/M NUDE1 LIS1-interacting protein NUDE1, rat homolog Hs.263925 N79612
IMAGE:180832	R87717	54820	G2/M	NUDE1 LIS1-interacting protein NUDE1, rat homolog Hs.263925		G2/M NUDE1 LIS1-interacting protein NUDE1, rat homolog Hs.263925 R87717
IMAGE:731095	AA421409	83540	G2/M	NUF2R hypothetical protein NUF2R Hs.234545		G2/M NUF2R hypothetical protein NUF2R Hs.234545 AA421409
IMAGE:196303	R92435	83540	G2/M	NUF2R hypothetical protein NUF2R Hs.234545		G2/M NUF2R hypothetical protein NUF2R Hs.234545 R92435
IMAGE:124138	R01238		M/G1	NXF1 **nuclear RNA export factor 1 Hs.323502		M/G1 NXF1 **nuclear RNA export factor 1 Hs.323502 R01238
IMAGE:869163	AI732118	84615	G1/S	ORP6 OSBP-related protein 6 Hs.318775		G1/S ORP6 OSBP-related protein 6 Hs.318775 AI732118
IMAGE:79254	T63084	10866	G2	P5-1 MHC class I region ORF Hs.1845		G2 P5-1 MHC class I region ORF Hs.1845 T63084
IMAGE:510060	AA053452	51585	M/G1	PCF11 PCF11p homolog Hs.123654		M/G1 PCF11 PCF11p homolog Hs.123654 AA053452
IMAGE:344274	W73811	51585	G2/M	PCF11 PCF11p homolog Hs.123654		G2/M PCF11 PCF11p homolog Hs.123654 W73811
IMAGE:810209	AA464521	89987	G2	PIF1 DNA helicase homolog PIF1 Hs.112160		G2 PIF1 DNA helicase homolog PIF1 Hs.112160 AA464521
IMAGE:712401	AA281652	5293	G2/M	PIK3CD phosphoinositide-3-kinase, catalytic, delta polypeptide Hs.162808		G2/M PIK3CD phosphoinositide-3-kinase, catalytic, delta polypeptide Hs.162808 AA281652
IMAGE:1947972	AI350546	5316	G2	PKNOX1 PBX/knotted 1 homeobox 1 Hs.158225		G2 PKNOX1 PBX/knotted 1 homeobox 1 Hs.158225 AI350546
IMAGE:767638	AA418251		G2/M	PLAG1 **pleiomorphic adenoma gene 1 Hs.14968		G2/M PLAG1 **pleiomorphic adenoma gene 1 Hs.14968 AA418251
IMAGE:79743	T63201		S phase	PMS2L8 **postmeiotic segregation increased 2-like 8 Hs.323954		S phase PMS2L8 **postmeiotic segregation increased 2-like 8 Hs.323954 T63201
IMAGE:814270	AA459213		G2/M	PMSCL1 **polymyositis/scleroderma autoantigen 1 (75kD) Hs.91728		G2/M PMSCL1 **polymyositis/scleroderma autoantigen 1 (75kD) Hs.91728 AA459213
IMAGE:745289	AA625570	84520	G1/S	PNAS-127 PNAS-127 protein Hs.20142		G1/S PNAS-127 PNAS-127 protein Hs.20142 AA625570
IMAGE:451706	AA707650	5422	S phase	POLA polymerase (DNA directed), alpha Hs.267289		S phase POLA polymerase (DNA directed), alpha Hs.267289 AA707650
IMAGE:745606	AA626336	80308	G1/S	PP591 hypothetical protein PP591 Hs.118666		G1/S PP591 hypothetical protein PP591 Hs.118666 AA626336
IMAGE:342082	W60310	5530	M/G1	PPP3CA protein phosphatase 3 (formerly 2B), catalytic subunit, alpha isoform (calcineurin A alpha) Hs.272458		M/G1 PPP3CA protein phosphatase 3 (formerly 2B), catalytic subunit, alpha isoform (calcineurin A alpha) Hs.272458 W60310
IMAGE:244754	N54333	29056	G2	PRO0650 PRO0650 protein Hs.177258		G2 PRO0650 PRO0650 protein Hs.177258 N54333
IMAGE:170	AI793029		G2	PRO1073 **PRO1073 protein Hs.6975		G2 PRO1073 **PRO1073 protein Hs.6975 AI793029
IMAGE:204483	H58234	29028	S phase	PRO2000 PRO2000 protein Hs.46677		S phase PRO2000 PRO2000 protein Hs.46677 H58234
IMAGE:280375	N47113	29028	G1/S	PRO2000 PRO2000 protein Hs.46677		G1/S PRO2000 PRO2000 protein Hs.46677 N47113
IMAGE:566474	AA152111	5717	G2	PSMD11 proteasome (prosome, macropain) 26S subunit, non-ATPase, 11 Hs.90744		G2 PSMD11 proteasome (prosome, macropain) 26S subunit, non-ATPase, 11 Hs.90744 AA152111
IMAGE:502603	AA134569	51715	G1/S	RAB23 RAB23, member RAS oncogene family Hs.94769		G1/S RAB23 RAB23, member RAS oncogene family Hs.94769 AA134569
IMAGE:41789	R59255	56852	S phase	RAD18 postreplication repair protein hRAD18p Hs.21320		S phase RAD18 postreplication repair protein hRAD18p Hs.21320 R59255
IMAGE:2308481	AI653182	11200	G2	RAD53 RAD53 homolog (S.cerevisiae) Hs.146329		G2 RAD53 RAD53 homolog (S.cerevisiae) Hs.146329 AI653182
IMAGE:126650	R06944	51514	G1/S	RAMP RA-regulated nuclear matrix-associated protein Hs.126774		G1/S RAMP RA-regulated nuclear matrix-associated protein Hs.126774 R06944
IMAGE:418150	W90164	51514	G1/S	RAMP RA-regulated nuclear matrix-associated protein Hs.126774		G1/S RAMP RA-regulated nuclear matrix-associated protein Hs.126774 W90164
IMAGE:781366	AA448402	9939	G2/M	RBM8A RNA binding motif protein 8A Hs.10283		G2/M RBM8A RNA binding motif protein 8A Hs.10283 AA448402
IMAGE:860000	AA663472	5982	S phase	RFC2 replication factor C (activator 1) 2 (40kD) Hs.139226		S phase RFC2 replication factor C (activator 1) 2 (40kD) Hs.139226 AA663472
IMAGE:711826	AA281057	9712	M/G1	RNTRE related to the N terminus of tre Hs.278526		M/G1 RNTRE related to the N terminus of tre Hs.278526 AA281057
IMAGE:1962510	AI254200	23521	M/G1	RPL13A ribosomal protein L13a Hs.119122		M/G1 RPL13A ribosomal protein L13a Hs.119122 AI254200
IMAGE:856489	AA633549	6240	S phase	RRM1 ribonucleotide reductase M1 polypeptide Hs.2934		S phase RRM1 ribonucleotide reductase M1 polypeptide Hs.2934 AA633549
IMAGE:624627	AA187351	6241	S phase	RRM2 ribonucleotide reductase M2 polypeptide Hs.75319		S phase RRM2 ribonucleotide reductase M2 polypeptide Hs.75319 AA187351
IMAGE:1422338	AA826373	6241	S phase	RRM2 ribonucleotide reductase M2 polypeptide Hs.75319		S phase RRM2 ribonucleotide reductase M2 polypeptide Hs.75319 AA826373
IMAGE:502142	AA128147	8819	G2	SAP30 sin3-associated polypeptide, 30kD Hs.20985		G2 SAP30 sin3-associated polypeptide, 30kD Hs.20985 AA128147
IMAGE:324154	AA284276	57190	G2/M	SEPN1 selenoprotein N, 1 Hs.8518		G2/M SEPN1 selenoprotein N, 1 Hs.8518 AA284276
IMAGE:727147	AA292860	6317	G1/S	SERPINB3 serine (or cysteine) proteinase inhibitor, clade B (ovalbumin), member 3 Hs.227948		G1/S SERPINB3 serine (or cysteine) proteinase inhibitor, clade B (ovalbumin), member 3 Hs.227948 AA292860
IMAGE:731039	AA421470	57108	G2/M	SET07 PR/SET domain containing protein 07 Hs.111988		G2/M SET07 PR/SET domain containing protein 07 Hs.111988 AA421470
IMAGE:950092	AA598400	6428	G2/M	SFRS3 splicing factor, arginine/serine-rich 3 Hs.167460		G2/M SFRS3 splicing factor, arginine/serine-rich 3 Hs.167460 AA598400
IMAGE:897547	AA497010	22950	G2	SLC4A1AP solute carrier family 4 (anion exchanger), member 1, adapter protein Hs.306000		G2 SLC4A1AP solute carrier family 4 (anion exchanger), member 1, adapter protein Hs.306000 AA497010
IMAGE:795877	AA460152	10769	M/G1	SNK serum-inducible kinase Hs.3838		M/G1 SNK serum-inducible kinase Hs.3838 AA460152
IMAGE:288695	N59206	6760	G2/M	SS18 synovial sarcoma translocation, chromosome 18 Hs.153221		G2/M SS18 synovial sarcoma translocation, chromosome 18 Hs.153221 N59206
IMAGE:795353	AA453486	6747	G1/S	SSR3 signal sequence receptor, gamma (translocon-associated protein gamma) Hs.28707		G1/S SSR3 signal sequence receptor, gamma (translocon-associated protein gamma) Hs.28707 AA453486
IMAGE:137245	R36160	10274	M/G1	STAG1 stromal antigen 1 Hs.286148		M/G1 STAG1 stromal antigen 1 Hs.286148 R36160
IMAGE:222025	H85557	6782	G2/M	STCH stress 70 protein chaperone, microsome-associated, 60kD Hs.288799		G2/M STCH stress 70 protein chaperone, microsome-associated, 60kD Hs.288799 H85557
IMAGE:241029	H81023	9212	G2	STK12 serine/threonine kinase 12 Hs.180655		G2 STK12 serine/threonine kinase 12 Hs.180655 H81023
IMAGE:129865	R19158		G2/M	STK15 **serine/threonine kinase 15 Hs.250822		G2/M STK15 **serine/threonine kinase 15 Hs.250822 R19158
IMAGE:746148	AA419612		G2	STK17B **serine/threonine kinase 17b (apoptosis-inducing) Hs.120996		G2 STK17B **serine/threonine kinase 17b (apoptosis-inducing) Hs.120996 AA419612
IMAGE:814234	AA465233	8801	G2	SUCLG2 succinate-CoA ligase, GDP-forming, beta subunit Hs.247309		G2 SUCLG2 succinate-CoA ligase, GDP-forming, beta subunit Hs.247309 AA465233
IMAGE:40893	R56194	9899	G2	SV2B synaptic vesicle protein 2B homolog Hs.8071		G2 SV2B synaptic vesicle protein 2B homolog Hs.8071 R56194
IMAGE:1568205	AI733267	23118	G2/M	TAB2 TAK1-binding protein 2 Hs.109727		G2/M TAB2 TAK1-binding protein 2 Hs.109727 AI733267
IMAGE:47096	H11130	63902	S phase	TASR2 TLS-associated serine-arginine protein 2 Hs.3530		S phase TASR2 TLS-associated serine-arginine protein 2 Hs.3530 H11130
IMAGE:204545	H58644	84168	M/G1	TEM8 tumor endothelial marker 8 Hs.8966		M/G1 TEM8 tumor endothelial marker 8 Hs.8966 H58644
IMAGE:815015	AA465096	58516	M/G1	TERA TERA protein Hs.180780		M/G1 TERA TERA protein Hs.180780 AA465096
IMAGE:1521977	AA906997	58516	M/G1	TERA TERA protein Hs.180780		M/G1 TERA TERA protein Hs.180780 AA906997
IMAGE:79761	T63980	7112	G2	TMPO thymopoietin Hs.11355		G2 TMPO thymopoietin Hs.11355 T63980
IMAGE:448059	AA702684	9868	M/G1	TOMM70A translocase of outer mitochondrial membrane 70 (yeast) homolog A Hs.21198		M/G1 TOMM70A translocase of outer mitochondrial membrane 70 (yeast) homolog A Hs.21198 AA702684
IMAGE:220376	H86877	7150	S phase	TOP1 topoisomerase (DNA) I Hs.317		S phase TOP1 topoisomerase (DNA) I Hs.317 H86877
IMAGE:666425	AA232856	7150	M/G1	TOP1 topoisomerase (DNA) I Hs.317		M/G1 TOP1 topoisomerase (DNA) I Hs.317 AA232856
IMAGE:301388	N79504		G2	TOP2A **topoisomerase (DNA) II alpha (170kD) Hs.156346		G2 TOP2A **topoisomerase (DNA) II alpha (170kD) Hs.156346 N79504
IMAGE:366971	AA026682	7153	G2	TOP2A topoisomerase (DNA) II alpha (170kD) Hs.156346		G2 TOP2A topoisomerase (DNA) II alpha (170kD) Hs.156346 AA026682
IMAGE:825470	AA504348	7153	G2	TOP2A topoisomerase (DNA) II alpha (170kD) Hs.156346		G2 TOP2A topoisomerase (DNA) II alpha (170kD) Hs.156346 AA504348
IMAGE:1629113	AI002631	55872	M/G1	TOPK PDZ-binding kinase; T-cell originated protein kinase Hs.104741		M/G1 TOPK PDZ-binding kinase; T-cell originated protein kinase Hs.104741 AI002631
IMAGE:785368	AA448898	55872	G2/M	TOPK PDZ-binding kinase; T-cell originated protein kinase Hs.104741		G2/M TOPK PDZ-binding kinase; T-cell originated protein kinase Hs.104741 AA448898
IMAGE:704410	AA279658		G1/S	TREX1 **three prime repair exonuclease 1 Hs.334676		G1/S TREX1 **three prime repair exonuclease 1 Hs.334676 AA279658
IMAGE:29828	R42331		M/G1	TSC22 **transforming growth factor beta-stimulated protein TSC-22 Hs.114360		M/G1 TSC22 **transforming growth factor beta-stimulated protein TSC-22 Hs.114360 R42331
IMAGE:2307420	AI672565	7280	G2	TUBB tubulin, beta polypeptide Hs.336780		G2 TUBB tubulin, beta polypeptide Hs.336780 AI672565
IMAGE:1492104	AA888148	10383	G2/M	TUBB2 tubulin, beta, 2 Hs.251653		G2/M TUBB2 tubulin, beta, 2 Hs.251653 AA888148
IMAGE:1636876	AI000256	10383	G2	TUBB2 tubulin, beta, 2 Hs.251653		G2 TUBB2 tubulin, beta, 2 Hs.251653 AI000256
IMAGE:71312	T47625	55075	G2	UACA uveal autoantigen with coiled-coil domains and ankyrin repeats Hs.49753		G2 UACA uveal autoantigen with coiled-coil domains and ankyrin repeats Hs.49753 T47625
IMAGE:361097	AA017199		M/G1	UBE2D3 **ubiquitin-conjugating enzyme E2D 3 (homologous to yeast UBC4/5) Hs.118797		M/G1 UBE2D3 **ubiquitin-conjugating enzyme E2D 3 (homologous to yeast UBC4/5) Hs.118797 AA017199
1292535	AA719022	84914	G2	UBF-fl ubiquitin UBF-fl Hs.288549		G2 UBF-fl ubiquitin UBF-fl Hs.288549 AA719022
IMAGE:79525	T82439	5412	S phase	UBL3 ubiquitin-like 3 Hs.173091		S phase UBL3 ubiquitin-like 3 Hs.173091 T82439
IMAGE:23018	T74984	29978	G1/S	UBQLN2 ubiquilin 2 Hs.4552		G1/S UBQLN2 ubiquilin 2 Hs.4552 T74984
IMAGE:243244	H94680		G1/S	UCP4 **uncoupling protein 4 Hs.40510		G1/S UCP4 **uncoupling protein 4 Hs.40510 H94680
IMAGE:49164	H16591	7412	G2/M	VCAM1 vascular cell adhesion molecule 1 Hs.109225		G2/M VCAM1 vascular cell adhesion molecule 1 Hs.109225 H16591
IMAGE:306621	N95041		G2/M	VIM **vimentin Hs.297753		G2/M VIM **vimentin Hs.297753 N95041
IMAGE:73852	T54850		G2	WISP1 **WNT1 inducible signaling pathway protein 1 Hs.194680		G2 WISP1 **WNT1 inducible signaling pathway protein 1 Hs.194680 T54850
IMAGE:788745	AA449975	10671	M/G1	WS-3 novel RGD-containing protein Hs.39913		M/G1 WS-3 novel RGD-containing protein Hs.39913 AA449975
IMAGE:594286	AA164474	58487	G1/S	ZF HCF-binding transcription factor Zhangfei Hs.29417		G1/S ZF HCF-binding transcription factor Zhangfei Hs.29417 AA164474
IMAGE:246869	N59119	7756	G2/M	ZNF207 zinc finger protein 207 Hs.62112		G2/M ZNF207 zinc finger protein 207 Hs.62112 N59119
IMAGE:742792	AA400474	11055	M/G1	ZPBP zona pellucida binding protein Hs.99875		M/G1 ZPBP zona pellucida binding protein Hs.99875 AA400474
IMAGE:451907	AA706968	11130	S phase	ZWINT ZW10 interactor Hs.42650		S phase ZWINT ZW10 interactor Hs.42650 AA706968
IMAGE:767069	AK025583		G2	Homo sapiens cDNA: FLJ21930 fis, clone HEP04301, highly similar to HSU90916 Human clone 23815 mRNA sequence		G2 Homo sapiens cDNA: FLJ21930 fis, clone HEP04301, highly similar to HSU90916 Human clone 23815 mRNA sequence AK025583
				E1146
Reference
1. Whitfield ML, Sherlock G, Saldanha AJ, Murray JI, Ball CA, Alexander KE, et al. Identification of genes periodically expressed in the human cell cycle and their expression in tumors. Mol Biol Cell. 2002;13(6):1977-2000. Epub 2002/06/12. doi: 10.1091/mbc.02-02-0030. PubMed PMID: 12058064; PubMed Central PMCID: PMCPMC117619.
2. Tirosh I, Izar B, Prakadan SM, Wadsworth MH, 2nd, Treacy D, Trombetta JJ, et al. Dissecting the multicellular ecosystem of metastatic melanoma by single-cell RNA-seq. Science. 2016;352(6282):189-96. Epub 2016/04/29. doi: 10.1126/science.aad0501. PubMed PMID: 27124452; PubMed Central PMCID: PMCPMC4944528.

## Sheet: Tirosh et al.
Table S2. Original cell cycle gene lists extracted from Whitfield et al. [1] and Tirosh et al. [2] studies and the final refined gene list.
2. Tirosh et al. [2] study gene list
GENE NAME	PHASE
MCM5	S phase
PCNA	S phase
TYMS	S phase
FEN1	S phase
MCM2	S phase
MCM4	S phase
RRM1	S phase
UNG	S phase
GINS2	S phase
MCM6	S phase
CDCA7	S phase
DTL	S phase
PRIM1	S phase
UHRF1	S phase
MLF1IP	S phase
HELLS	S phase
RFC2	S phase
RPA2	S phase
NASP	S phase
RAD51AP1	S phase
GMNN	S phase
WDR76	S phase
SLBP	S phase
CCNE2	S phase
UBR7	S phase
POLD3	S phase
MSH2	S phase
ATAD2	S phase
RAD51	S phase
RRM2	S phase
CDC45	S phase
CDC6	S phase
EXO1	S phase
TIPIN	S phase
DSCC1	S phase
BLM	S phase
CASP8AP2	S phase
USP1	S phase
CLSPN	S phase
POLA1	S phase
CHAF1B	S phase
BRIP1	S phase
E2F8	S phase
HMGB2	G2/M
CDK1	G2/M
NUSAP1	G2/M
UBE2C	G2/M
BIRC5	G2/M
TPX2	G2/M
TOP2A	G2/M
NDC80	G2/M
CKS2	G2/M
NUF2	G2/M
CKS1B	G2/M
MKI67	G2/M
TMPO	G2/M
CENPF	G2/M
TACC3	G2/M
FAM64A	G2/M
SMC4	G2/M
CCNB2	G2/M
CKAP2L	G2/M
CKAP2	G2/M
AURKB	G2/M
BUB1	G2/M
KIF11	G2/M
ANP32E	G2/M
TUBB4B	G2/M
GTSE1	G2/M
KIF20B	G2/M
HJURP	G2/M
CDCA3	G2/M
HN1	G2/M
CDC20	G2/M
TTK	G2/M
CDC25C	G2/M
KIF2C	G2/M
RANGAP1	G2/M
NCAPD2	G2/M
DLGAP5	G2/M
CDCA2	G2/M
CDCA8	G2/M
ECT2	G2/M
KIF23	G2/M
HMMR	G2/M
AURKA	G2/M
PSRC1	G2/M
ANLN	G2/M
LBR	G2/M
CKAP5	G2/M
CENPE	G2/M
CTCF	G2/M
NEK2	G2/M
G2E3	G2/M
GAS2L3	G2/M
CBX5	G2/M
CENPA	G2/M
Reference
1. Whitfield ML, Sherlock G, Saldanha AJ, Murray JI, Ball CA, Alexander KE, et al. Identification of genes periodically expressed in the human cell cycle and their expression in tumors. Mol Biol Cell. 2002;13(6):1977-2000. Epub 2002/06/12. doi: 10.1091/mbc.02-02-0030. PubMed PMID: 12058064; PubMed Central PMCID: PMCPMC117619.
2. Tirosh I, Izar B, Prakadan SM, Wadsworth MH, 2nd, Treacy D, Trombetta JJ, et al. Dissecting the multicellular ecosystem of metastatic melanoma by single-cell RNA-seq. Science. 2016;352(6282):189-96. Epub 2016/04/29. doi: 10.1126/science.aad0501. PubMed PMID: 27124452; PubMed Central PMCID: PMCPMC4944528.

## Sheet: Refined list
Table.S2. Original cell cycle gene lists extracted from Whitfield et al. [1] and Tirosh et al. [2] studies and the final refined gene list.
3. Refined gene list
GENE NAME	PHASE
SLC22A3	S phase
NFE2L2	S phase
MAP3K2	S phase
OGT	S phase
SH3GL2	S phase
CAPS	S phase
MAN1A2	S phase
RPS25	S phase
USP1	S phase
ZNF217	S phase
SHC1	S phase
ABCC2	S phase
TYMS	S phase
RAD54L	S phase
STAG3	S phase
PKMYT1	S phase
ASIP	S phase
PRIM1	S phase
RFC4	S phase
RPA2	S phase
FANCA	S phase
EXO1	S phase
RAD51	S phase
BRCA1	S phase
RBBP8	S phase
FEN1	S phase
MBD4	S phase
COL7A1	S phase
LMO4	S phase
CHML	S phase
DNAJB4	S phase
GCLM	S phase
EZH2	S phase
ABCC5	S phase
BBS2	S phase
BMI1	S phase
CDH24	S phase
DHFR	S phase
DNAJC6	S phase
EIF4A2	S phase
EIF4EBP2	S phase
H1F0	S phase
HELLS	S phase
KIAA0101	S phase
KIAA1598	S phase
MITF	S phase
NAB1	S phase
RAD18	S phase
RFC2	S phase
RRM1	S phase
RRM2	S phase
UBL3	S phase
ZWINT	S phase
MCM4	S phase
GINS2	S phase
CDCA7	S phase
DTL	S phase
UHRF1	S phase
RAD51AP1	S phase
GMNN	S phase
WDR76	S phase
UBR7	S phase
ATAD2	S phase
CDC45	S phase
TIPIN	S phase
DSCC1	S phase
BLM	S phase
CLSPN	S phase
POLA1	S phase
BRIP1	S phase
E2F8	S phase
AP4B1	G1/S
CASP8AP2	G1/S
SLBP	G1/S
CHAF1A	G1/S
CHAF1B	G1/S
RUNX1	G1/S
CCNE2	G1/S
TOP3A	G1/S
ACYP1	G1/S
INSR	G1/S
MCM5	G1/S
POLD3	G1/S
CDC6	G1/S
MSH2	G1/S
PCNA	G1/S
UNG	G1/S
RECQL4	G1/S
FANCG	G1/S
NASP	G1/S
TOPBP1	G1/S
MAP2K6	G1/S
BAIAP2	G1/S
ADAMTS1	G1/S
HRAS	G1/S
E2F1	G1/S
MCM2	G1/S
DDX11	G1/S
MNT	G1/S
CDC25A	G1/S
HSF2	G1/S
DNAJC3	G1/S
MCAM	G1/S
PNN	G1/S
CTSD	G1/S
SDC1	G1/S
ABCA7	G1/S
ADCY6	G1/S
AP3M2	G1/S
BARD1	G1/S
BRD7	G1/S
CAPN7	G1/S
CCNE1	G1/S
DMTF1	G1/S
DNAJB9	G1/S
ESD	G1/S
HOXB4	G1/S
KIAA1586	G1/S
LENG8	G1/S
LRRFIP1	G1/S
MCM6	G1/S
NKTR	G1/S
NPAT	G1/S
RAB23	G1/S
SERPINB3	G1/S
SSR3	G1/S
TREX1	G1/S
UBQLN2	G1/S
KPNB1	M/G1
NFIC	M/G1
ZNF281	M/G1
HIF1A	M/G1
PRKAR1A	M/G1
GNB1	M/G1
VEGFC	M/G1
DKC1	M/G1
EIF4E	M/G1
NCOA3	M/G1
PTTG1	M/G1
MDM2	M/G1
CRK	M/G1
PPP2CA	M/G1
NUDT4	M/G1
RAN	M/G1
KMO	M/G1
PTMS	M/G1
RAD21	M/G1
HMGCR	M/G1
DSP	M/G1
TOB2	M/G1
CDKN3	M/G1
PRC1	M/G1
FABP1	M/G1
RAB3A	M/G1
VCL	M/G1
PDGFA	M/G1
FXR1	M/G1
PSEN1	M/G1
CDK7	M/G1
CD24	M/G1
C4B	M/G1
AOC2	M/G1
CRYBA1	M/G1
AOC3	M/G1
TROAP	M/G1
AMD1	M/G1
BAG3	M/G1
CBX3	M/G1
CDC42	M/G1
DNAJB6	M/G1
ILF2	M/G1
KIAA0586	M/G1
MRPL19	M/G1
MRPS18B	M/G1
MRPS2	M/G1
NFIA	M/G1
NXF1	M/G1
PPP3CA	M/G1
RPL13A	M/G1
STAG1	M/G1
TOMM70A	M/G1
ZPBP	M/G1
PPP1R10	G2/M
RERE	G2/M
SLC17A2	G2/M
TRIP13	G2/M
CTCF	G2/M
DR1	G2/M
PWP1	G2/M
MAPK13	G2/M
SRF	G2/M
ITPR1	G2/M
DUSP4	G2/M
BIRC2	G2/M
CIT	G2/M
TXNRD1	G2/M
YWHAH	G2/M
RNPS1	G2/M
SFPQ	G2/M
PTPN9	G2/M
TSG101	G2/M
USP13	G2/M
CSH2	G2/M
OLR1	G2/M
TFF3	G2/M
NUP98	G2/M
TTK	G2/M
PTP4A1	G2/M
BUB1	G2/M
HMMR	G2/M
TACC3	G2/M
BIRC5	G2/M
MLLT4	G2/M
PRPSAP1	G2/M
CENPE	G2/M
CENPF	G2/M
BUB1B	G2/M
NEK2	G2/M
CDC25B	G2/M
ADH4	G2/M
ME3	G2/M
RAD51C	G2/M
TSN	G2/M
SMARCD1	G2/M
SMARCB1	G2/M
SRD5A1	G2/M
LMNA	G2/M
SMTN	G2/M
CDKN2D	G2/M
FRZB	G2/M
BMP2	G2/M
GAS6	G2/M
CDC27	G2/M
CKS2	G2/M
CENPA	G2/M
CNN2	G2/M
GADD45A	G2/M
USP16	G2/M
CDC20	G2/M
MKI67	G2/M
E2F5	G2/M
FOXM1	G2/M
ARHGDIB	G2/M
C6	G2/M
CTNND1	G2/M
FYN	G2/M
GCSH	G2/M
GOT1	G2/M
INSM1	G2/M
ABCC1	G2/M
ARHGAP8	G2/M
B4GALT1	G2/M
CCNB1	G2/M
CCNB2	G2/M
CTNNA1	G2/M
ERN2	G2/M
FEM1B	G2/M
FGA	G2/M
GTSE1	G2/M
HSPA1L	G2/M
IDI2	G2/M
INADL	G2/M
LBR	G2/M
LPP	G2/M
MATN2	G2/M
PIK3CD	G2/M
PLAG1	G2/M
RBM8A	G2/M
SEPN1	G2/M
SS18	G2/M
TAB2	G2/M
VCAM1	G2/M
VIM	G2/M
ZNF207	G2/M
HMGB2	G2/M
CDK1	G2/M
NUSAP1	G2/M
TPX2	G2/M
NDC80	G2/M
NUF2	G2/M
CKS1B	G2/M
FAM64A	G2/M
SMC4	G2/M
CKAP2L	G2/M
CKAP2	G2/M
AURKB	G2/M
KIF11	G2/M
ANP32E	G2/M
TUBB4B	G2/M
KIF20B	G2/M
HJURP	G2/M
CDCA3	G2/M
HN1	G2/M
KIF2C	G2/M
RANGAP1	G2/M
NCAPD2	G2/M
DLGAP5	G2/M
CDCA2	G2/M
CDCA8	G2/M
ECT2	G2/M
KIF23	G2/M
AURKA	G2/M
PSRC1	G2/M
ANLN	G2/M
CKAP5	G2/M
G2E3	G2/M
GAS2L3	G2/M
CBX5	G2/M
CDR2	G2
TTF2	G2
STAT5B	G2
RGS3	G2
ROCK1	G2
ITPR3	G2
NMB	G2
STAT1	G2
NR3C1	G2
UBE2C	G2
MGAT2	G2
TUBB	G2
FKBP1A	G2
CASP3	G2
CCNA2	G2
TFAP2A	G2
CDKN2C	G2
MET	G2
FADD	G2
MAD2L1	G2
KATNA1	G2
BUB3	G2
CDC16	G2
AP3D1	G2
PPP1R2	G2
POLQ	G2
KPNA2	G2
MID1	G2
TIMP1	G2
GAS1	G2
CDKN1B	G2
CDC25C	G2
FZR1	G2
CCNF	G2
HDAC3	G2
EBI3	G2
IL18BP	G2
ITGB3	G2
GABPB2	G2
H2AFX	G2
HLA-DRA	G2
KIAA1524	G2
LMNB1	G2
LTBP3	G2
MUC1	G2
NNMT	G2
PIF1	G2
PKNOX1	G2
PSMD11	G2
SAP30	G2
SLC4A1AP	G2
STK17B	G2
SV2B	G2
TMPO	G2
TOP2A	G2
UACA	G2
WISP1	G2
Reference
1. Whitfield ML, Sherlock G, Saldanha AJ, Murray JI, Ball CA, Alexander KE, et al. Identification of genes periodically expressed in the human cell cycle and their expression in tumors. Mol Biol Cell. 2002;13(6):1977-2000. Epub 2002/06/12. doi: 10.1091/mbc.02-02-0030. PubMed PMID: 12058064; PubMed Central PMCID: PMCPMC117619.
2. Tirosh I, Izar B, Prakadan SM, Wadsworth MH, 2nd, Treacy D, Trombetta JJ, et al. Dissecting the multicellular ecosystem of metastatic melanoma by single-cell RNA-seq. Science. 2016;352(6282):189-96. Epub 2016/04/29. doi: 10.1126/science.aad0501. PubMed PMID: 27124452; PubMed Central PMCID: PMCPMC4944528.
