# Supplementary material for: Neuronal cell cycle reentry events in the aging brain are more prevalent in neurodegeneration and lead to cellular senescence
Source: PLoS Biol. 2024 Apr 23;22(4):e3002559. doi: 10.1371/journal.pbio.3002559 (PMC11037540; doi:10.1371/journal.pbio.3002559)
Supplement: S3 Table — (XLSX) [file pbio.3002559.s027.xlsx]

## Sheet: Gene lists
Table S3. Lists of genes located at the predicted copy number alteration regions in Sub-clusters 5 and the pathway enrichment analysis
Genes located at predicted CNV gain regions		Genes located at predicted CNV loss regions
NOC2L		PATJ
HES4		USP1
AGRN		DOCK7
C1orf159		ATG4C
SDF4		ITGB3BP
UBE2J2		EFCAB7
SCNN1D		PGM1
ACAP3		CACHD1
INTS11		RAVER2
DVL1		JAK1
AURKAIP1		AK4
CCNL2		DNAJC6
MRPL20		LEPR
ATAD3B		PDE4B
ATAD3A		SGIP1
SSU72		MIER1
MIB2		SLC35D1
CDK11B		IL12RB2
SLC35E2B		SERBP1
SLC35E2A		WLS
NADK		LRRC7
GNB1		LRRC40
CFAP74		SRSF11
GABRD		ANKRD13C
PRKCZ		ZRANB2
SKI		NEGR1
MORN1		ERICH3
RER1		TYW3
PLCH2		SLC44A5
TNFRSF14		ACADM
TPRG1L		MSH4
LRRC47		ST6GALNAC3
CEP104		ST6GALNAC5
DFFB		PIGK
AJAP1		AK5
NPHP4		ZZZ3
KCNAB2		USP33
CHD5		MIGA1
RPL22		FUBP1
ICMT		GIPC2
ACOT7		ADGRL2
TNFRSF25		LINC01725
PLEKHG5		TTLL7
NOL9		PRKACB
KLHL21		SSX2IP
DNAJC11		C1orf52
CAMTA1		DDAH1
PER3		ZNHIT6
PARK7		COL24A1
ERRFI1		ODF2L
SLC45A1		SH3GLB1
RERE		SELENOF
ENO1		HS2ST1
CLSTN1		LMO4
CTNNBIP1		PKN2-AS1
UBE4B		PKN2
KIF1B		GTF2B
PGD		LRRC8B
PEX14		LRRC8D
SRM		SLC35F3
EXOSC10		COA6
MTOR		TARBP1
FBXO2		IRF2BP2
FBXO44		TOMM20
MTHFR		ARID4B
KIAA2013		TBCE
MFN2		B3GALNT2
VPS13D		LYST
PRDM2		GPR137B
KAZN		ERO1B
EFHD2		LGALS8
DNAJC16		HEATR1
DDI2		ACTN2
PLEKHM2		MTR
UQCRHL		RYR2
SPEN		CHRM3
FBXO42		CHRM3-AS2
NBPF1		FMN2
CROCC		GREM2
ATP13A2		RGS7
SDHB		OPN3
RCC2		PLD5
ARHGEF10L		CEP170
IGSF21		SDCCAG8
UBR4		AKT3
EMC1		ZBTB18
CAPZB		DESI2
NBL1		COX20
OTUD3		HNRNPU
CAMK2N1		EFCAB2
PINK1		KIF26B
KIF17		SMYD3
HP1BP3		CNST
EIF4G3		SCCPDH
ECE1		AHCTF1
RAP1GAP		ZNF124
USP48		ZNF496
CDC42		OR2L13
EPHB2		LYPD8
KDM1A		SH3BP5L
LUZP1		ZNF692
HNRNPR		SLC35F5
RPL11		ACTR3
PITHD1		DPP10
LYPLA2		DDX18
SRSF10		CCDC93
STPG1		INSIG2
NIPAL3		CFAP221
SRRM1		PTPN4
SYF2		EPB41L5
RSRP1		CLASP1
TMEM50A		NIFK-AS1
MACO1		TSN
MAN1C1		CNTNAP5
MTFR1L		BIN1
STMN1		ERCC3
EXTL1		MAP3K2
PDIK1L		IWS1
SH3BGRL3		WDR33
DHDDS		SAP130
HMGN2		UGGT1
ARID1A		HS6ST1
ZDHHC18		SMPD4
NUDC		MZT2B
SLC9A1		CCDC115
WDTC1		IMP4
TMEM222		PTPN18
WASF2		AMER3
AHDC1		ARHGEF4
IFI6		FAM168B
FAM76A		PLEKHB2
STX12		MZT2A
EYA3		ANKRD30BL
DNAJC8		NCKAP5
ATP5IF1		MGAT5
PHACTR4		TMEM163
RCC1		CCNT2-AS1
TRNAU1AP		CCNT2
GMEB1		RAB3GAP1
YTHDF2		ZRANB3
OPRD1		R3HDM1
EPB41		UBXN4
SRSF4		SPOPL
MECR		LRP1B
PTPRU		ARHGAP15
SDC3		GTDC1
PUM1		ZEB2
SNRNP40		TEX41
ZCCHC17		ACVR2A
FABP3		ORC4
PEF1		MBD5
COL16A1		EPC2
ADGRB2		KIF5C
KHDRBS1		MMADHC
TMEM39B		RIF1
KPNA6		ARL5A
TXLNA		CACNB4
EIF3I		STAM2
MARCKSL1		FMNL2
BSDC1		PRPF40A
ZBTB8OS		ARL6IP6
RBBP4		GALNT13
SYNC		KCNJ3
ENSA		GPD2
GOLPH3L		ACVR1C
ARNT		ACVR1
SETDB1		UPP2
C1orf56		CCDC148
CDC42SE1		PKP4
MLLT11		WDSUB1
GABPB2		BAZ2B
SEMA6C		PLA2R1
VPS72		RBMS1
PIP5K1A		TANK
PSMD4		PSMD14
PI4KB		SLC4A10
PSMB4		FAP
POGZ		GCA
SNX27		KCNH7
CELF3		FIGN
THEM4		GRB14
FLG-AS1		COBLL1
S100A6		SLC38A11
CHTOP		SCN3A
ILF2		SCN2A
INTS3		CSRNP3
GATAD2B		TTC21B
DENND4B		SCN1A
JTB		SCN9A
RPS27		STK39
TPM3		CERS6
C1orf43		FASTKD1
UBAP2L		PPIG
HAX1		KLHL23
ATP8B2		SSB
UBE2Q1		UBR3
CHRNB2		GORASP2
ADAR		TLK1
KCNN3		METTL8
PYGO2		DCAF17
ADAM15		TKT
DPM3		DCP1A
TRIM46		CACNA1D
GBA		CACNA2D3
FAM189B		LRTM1
SCAMP3		ERC2
FDPS		CCDC66
RUSC1		ARHGEF3
ASH1L		APPL1
YY1AP1		PDE12
DAP3		ARF4
GON4L		DENND6A
SYT11		SLMAP
KHDC4		FLNB
ARHGEF2		ABHD6
SSR2		RPP14
UBQLN4		PXK
LMNA		PDHB
SEMA4A		FAM107A
SMG5		FHIT
CCT3		PTPRG
MEF2D		C3orf14
HAPLN2		CADPS
BCAN		SYNPR
HDGF		THOC7
PRCC		ATXN7
ARHGEF11		PSMD6
CADM3		PRICKLE2
KCNJ9		ADAMTS9-AS2
IGSF8		MAGI1
PEA15		SLC25A26
DCAF8		LRIG1
COPA		TAFA1
NCSTN		TMF1
PFDN2		UBA3
NIT1		ARL6IP5
UFC1		FOXP1
NDUFS2		EIF4E3
SDHC		RYBP
ATF6		GXYLT2
NOS1AP		PPP4R2
UHMK1		PDZRN3
UAP1		CNTN3
RGS4		ZNF717
PBX1		ROBO2
MGST3		ROBO1
TMCO1		GBE1
UCK2		CADM2
GNL1		CHMP2B
PRR3		CGGBP1
ABCF1		ZNF654
PPP1R10		C3orf38
ATAT1		EPHA3
C6orf136		PROS1
TUBB		ARL13B
FLOT1		NSUN3
VARS2		MTRNR2L12
CCHCR1		EPHA6
PRRC2A		ARL6
BAG6		CRYBG3
HSPA1A		CLDND1
HSPA1B		CPOX
EHMT2		ST3GAL6
STK19		TAPT1
TNXB		TAPT1-AS1
ATF6B		LDB2
PRRT1		QDPR
AGPAT1		MED28
PBX2		FAM184B
BRD2		DCAF16
RXRB		LCORL
RING1		SLIT2
VPS52		PACRGL
RPS18		KCNIP4
WDR46		PPARGC1A
PFDN6		DHX15
TAPBP		CCDC149
PHF1		ANAPC4
CUTA		SEL1L3
SYNGAP1		RBPJ
UQCC2		TBC1D19
LEMD2		STIM2
SMIM29		PCDH7
NUDT3		ARAP2
PACSIN1		NWD2
SNRPC		TBC1D1
UHRF1BP1		KLHL5
TAF11		WDR19
ANKS1A		RFC1
ZNF76		SMIM14
PPARD		UBE2K
RPL10A		PDS5A
FKBP5		N4BP2
LHFPL5		APBB2
SRPK1		UCHL1
SLC26A8		LIMCH1
PDGFA		TMEM33
PRKAR1B		SLC30A9
DNAAF5		ATP8A1
SUN1		KCTD8
ADAP1		GUF1
COX19		GNPDA2
C7orf50		GABRG1
MICALL2		GABRA2
INTS1		GABRA4
MAFK		GABRB1
PSMG3		ATP10D
MAD1L1		NFXL1
SNX8		SLAIN2
EIF3B		FRYL
CHST12		OCIAD1
BRAT1		DCUN1D4
IQCE		SGCB
TTYH3		USP46
GNA12		SCFD2
SDK1		LNX1
FOXK1		ICE1
AP5Z1		MED10
RBAK-RBAKDN		UBE2QL1
WIPI2		NSUN2
LZTS1		SRD5A1
GFRA2		TENT4A
XPO7		LINC02196
NPM2		ADCY2
FGF17		MTRR
DMTN		SEMA5A
HR		CCT5
LGI3		ANKRD33B
PHYHIP		CTNND2
SLC39A14		TRIO
PPP3CC		ANKH
CCAR2		RETREG1
BIN3		BASP1
EGR3		BASP1-AS1
RHOBTB2		LINC02217
CHMP7		LINC02223
ENTPD4		CDH18
SLC25A37		LINC02241
NEFM		CDH12
NEFL		CDH10
PPP2R2A		CDH9
BNIP3L		CDH6
PNMA2		DROSHA
DPYSL2		C5orf22
STMN4		PDZD2
PTK2B		GOLPH3
CLU		MTMR12
CCDC25		ZFR
ELP3		SUB1
FBXO16		C1QTNF3-AMACR
FZD3		BRIX1
EXTL3		DNAJC21
INTS9		SPEF2
HMBOX1		LMBRD2
KIF13B		SKP2
SARAF		NADK2
LEPROTL1		NIPBL
DCTN6		CPLANE1
GTF2E2		NUP155
GSR		WDR70
PPP2CB		LIFR
SH2D3C		RICTOR
CDK9		TTC33
FPGS		PRKAA1
AK1		RPL37
DPM2		PLCXD3
FAM102A		OXCT1
SLC25A25		GHR
PTGES2		ZNF131
CIZ1		NIM1K
DNM1		HMGCS1
GOLGA2		TMEM267
COQ4		PAIP1
SLC27A4		NNT-AS1
URM1		NNT
CERCAM		MRPS30-DT
ODF2		MRPS30
GLE1		HCN1
SPTAN1		EMB
SET		PARP8
ZER1		MOCS2
TBC1D13		CCNH
KYAT1		TMEM161B
LRRC8A		LINC00461
SH3GLB2		MEF2C
MIGA2		MEF2C-AS1
PTPA		MBLAC2
IER5L		POLR3G
ASB6		ADGRV1
C9orf78		ARRDC3
USP20		NR2F1-AS1
FNBP1		NR2F1
GPR107		FAM172A
NCS1		KIAA0825
FUBP3		SLF1
ABL1		MCTP1
NUP214		TTC37
PLPP7		RHOBTB3
PRRC2B		GLRX
POMT1		ELL2
UCK1		PCSK1
RAPGEF1		CAST
MED27		ERAP1
NTNG2		LNPEP
SETX		LIX1-AS1
TTF1		RGMB
GTF3C4		CHD1
TSC1		FAM174A
GTF3C5		PAM
RALGDS		PPIP5K2
RPL7A		EFNA5
SURF4		FBXL17
REXO4		FER
ADAMTS13		PJA2
SLC2A6		MAN2A1
BRD3		TMEM232
WDR5		SLC25A46
OLFM1		WDR36
MRPS2		CAMK4
SOHLH1		STARD4
KCNT1		TRAM2
CAMSAP1		TMEM14A
UBAC1		GSTA4
GPSM1		FBXO9
SNAPC4		ELOVL5
PMPCA		GCLC
INPP5E		MLIP
SEC16A		HMGCLL1
EGFL7		COL21A1
RABL6		DST
AJM1		BEND6
EDF1		KIAA1586
FBXW5		ZNF451
PAXX		RAB23
ABCA2		PRIM2
MAN1B1		KHDRBS2
DPP7		PTP4A1
GRIN1		PHF3
SSNA1		EYS
TPRN		ADGRB3
RNF208		LMBRD1
TUBB4B		COL19A1
NELFB		FAM135A
EXD3		SMAP1
NOXA1		B3GAT2
NSMF		OGFRL1
PNPLA7		RIMS1
MRPL41		KCNQ5
DPH7		KHDC1
ARRDC1		OOEP
EHMT1		MTO1
CACNA1B		EEF1A1
BET1L		SLC17A5
RIC8A		COL12A1
SIRT3		COX7A2
PSMD13		TMEM30A
B4GALNT4		SENP6
PTDSS2		MYO6
RNH1		IRAK1BP1
HRAS		PHIP
DEAF1		HMGN3
TALDO1		LCA5
GATD1		SH3BGRL2
CEND1		ELOVL4
SLC25A22		BCKDHB
PIDD1		IBTK
RPLP2		TPBG
PNPLA2		UBE3D
POLR2L		PGM3
CHID1		ME1
AP2A2		SNAP91
TOLLIP		CYB5R4
BRSK2		MRAP2
MOB2		CEP162
DUSP8		SNX14
CD81		HTR1E
KCNQ1		ZNF292
KCNQ1OT1		SMIM8
NAP1L4		SLC35A1
OSBPL5		RARS2
ZNF195		ORC3
NUP98		AKIRIN2
PGAP2		CNR1
STIM1		RNGTT
APBB1		PNRC1
TRIM3		SRSF12
ARFIP2		PM20D2
DNHD1		NKAIN2
ILK		RNF217
TPP1		TPD52L1
SYT9		HDDC2
EIF3F		NCOA7
TUB		HINT3
RIC3		TRMT11
C1QTNF4		RNF146
MTCH2		ECHDC1
FNBP4		THEMIS
NUP160		PTPRK
PTPRJ		LAMA2
SSRP1		ARHGAP18
RTN4RL2		L3MBTL3
YPEL4		EPB41L2
ZDHHC5		AKAP7
MED19		MED23
CTNND1		MOXD1
DTX4		STX7
OSBP		SLC18B1
STX3		RPS12
PRPF19		TBPL1
TMEM132A		SGK1
DDB1		HBS1L
CPSF7		AHI1
SYT7		PDE7B
DAGLA		BCLAF1
TMEM258		MAP7
FADS3		MAP3K5
FTH1		IFNGR1
ASRGL1		ARFGEF3
B3GAT3		CCDC28A
GANAB		REPS1
UBXN1		HECA
GNG3		VTA1
TTC9C		HIVEP2
NXF1		AIG1
STX5		PEX3
SLC3A2		PHACTR2
CHRM1		PLAGL1
SLC22A10		UTRN
ATL3		EPM2A
RTN3		SHPRH
MARK2		GRM1
OTUB1		STXBP5-AS1
MACROD1		STXBP5
STIP1		SAMD5
FKBP2		SASH1
BAD		UST
GPR137		TAB2
ESRRA		PPIL4
TRMT112		GINM1
PRDX5		LATS1
RPS6KA4		PCMT1
NRXN2		LRP11
SF1		PPP1R14C
MAP4K2		PLEKHG1
MEN1		MTHFD1L
PPP2R5B		AKAP12
VPS51		RMND1
TM7SF2		SYNE1
FAU		RGS17
CAPN1		OPRM1
DPF2		IPCEF1
FRMD8		CNKSR3
NEAT1		SCAF8
MALAT1		TIAM2
SCYL1		TFB1M
LTBP3		ARID1B
FAM89B		TMEM242
RNASEH2C		ZDHHC14
CFL1		SNX9
SNX32		SYNJ2
FIBP		SERAC1
CCDC85B		GTF2H5
C11orf68		TULP4
DRAP1		TMEM181
SART1		DYNLT1
BANF1		RSPH3
SF3B2		SOD2
PACS1		WTAP
KLC2		TCP1
RAB1B		MRPL18
CNIH2		IGF2R
TMEM151A		MAP3K4
RIN1		AGPAT4
B4GAT1		PRKN
PELI3		PACRG
CTSF		QKI
CCS		PDE10A
RBM14-RBM4		SFT2D1
RBM4		MPC1
RBM4B		RPS6KA2
SPTBN2		AFDN
C11orf80		WDR27
PC		PHF10
LRFN4		FAM120B
SYT12		PSMB1
IQSEC3		FBXO25
KDM5A		TDRP
B4GALNT3		ERICH1
WNK1		DLGAP2
RAD52		KBTBD11
ERC1		MYOM2
FBXL14		CSMD1
ADIPOR2		MCPH1
LRTM2		MCPH1-AS1
DCP1B		AGPAT5
CACNA1C		FAM85B
FKBP4		PRAG1
ITFG2		MFHAS1
TSPAN9		TNKS
PRMT8		MSRA
PARP11		XKR6
CCND2		WASHC1
TIGAR		CBWD1
C12orf4		SMARCA2
GALNT8		VLDLR-AS1
KCNA1		KCNV2
VAMP1		PUM3
MRPL51		RFX3
GAPDH		GLIS3
IFFO1		SLC1A1
CHD4		SPATA6L
ING4		CDC37L1
PIANP		AK3
COPS7A		RCL1
MLF2		JAK2
PTMS		PLGRKT
GPR162		RIC1
P3H3		ERMP1
USP5		KIAA2026
TPI1		RANBP6
LRRC23		UHRF2
ENO2		GLDC
ATN1		KDM4C
C12orf57		PTPRD
PHB2		LURAP1L
LPCAT3		MPDZ
CLSTN3		NFIB
PEX5		ZDHHC21
CD163L1		FREM1
SLC2A3		TTC39B
NECAP1		SNAPC3
FAM66C		PSIP1
LINC00937		CCDC171
RIMKLB		CNTLN
PHC1		SH3GL2
M6PR		ADAMTSL1
GABARAPL1		RRAGA
KLRD1		DENND4C
WNT10B		RPS6
DDN		ACER2
PRKAG1		SLC24A2
KMT2D		MLLT3
LMBR1L		FOCAD
TUBA1B		KLHL9
TUBA1A		ZMYND11
SPATS2		DIP2C
KCNH3		LARP4B
MCRS1		GTPBP4
PRPF40B		IDI1
FMNL3		WDR37
TMBIM6		ADARB2
FAIM2		PFKP
ASIC1		PITRM1
SMARCD1		KLF6
CERS5		GDI2
LIMA1		ANKRD16
LARP4		FBH1
DIP2B		RBM17
ATF1		PFKFB3
SLC11A2		SFMBT2
LETMD1		KIN
CSRNP2		ATP5F1C
TFCP2		TAF3
POU6F1		CELF2
DAZAP2		CELF2-AS2
SLC4A8		UPF2
SCN8A		DHTKD1
ACVR1B		SEC61A2
EIF4B		NUDT5
SPRYD3		CDC123
CSAD		CAMK1D
PFDN5		CCDC3
AAAS		OPTN
PRR13		FRMD4A
PCBP2		RPP38
MAP3K12		NMT2
ATP5MC2		FAM171A1
CALCOCO1		ITGA8
CBX5		MINDY3
HNRNPA1		RSU1
COPZ1		STAM
PDE1B		CACNB2
TESPA1		NSUN6
ITGA7		ARL5B
CD63		MALRD1
DGKA		PLXDC2
RAB5B		NEBL
PA2G4		MLLT10
RPL41		DNAJC1
ESYT1		BMI1
MYL6B		PIP4K2A
MYL6		MSRB2
SMARCC2		KIAA1217
RNF41		ARHGAP21
ANKRD52		PRTFDC1
CS		GPR158
PAN2		ABI1
STAT2		ANKRD26
GLS2		YME1L1
BAZ2A		ACBD5
ATP5F1B		RAB18
PTGES3		MKX
NACA		MPP7
NAB2		WAC-AS1
STAT6		WAC
UNC79		JCAD
DDX24		MTPAP
PPP4R4		ZNF438
DICER1		ZEB1
CLMN		ARHGAP12
GLRX5		KIF5B
C14orf132		EPC1
ATG2B		CCDC7
GSKIP		ITGB1
PAPOLA		NRP1
VRK1		ALG8
BCL11B		GAB2
SETD3		NARS2
CCNK		TENM4
CYP46A1		PRCP
EML1		RAB30
EVL		PCF11
YY1		ANKRD42
SLC25A29		CCDC90B
WDR25		DLG2
BEGAIN		TMEM126B
MEG3		CREBZF
MEG8		SYTL2
PPP2R5C		PICALM
DYNC1H1		EED
HSP90AA1		ME3
WDR20		PRSS23
MOK		TMEM135
CINP		GRM5
TECPR2		NAALAD2
ANKRD9		CHORDC1
RCOR1		FAT3
TRAF3		SLC36A4
CDC42BPB		CEP295
EIF5		TAF1D
MARK3		MRE11
CKB		ANKRD49
BAG5		CWC15
KLC1		SRSF8
ZFYVE21		ENDOD1
PPP1R13B		SESN3
TMEM179		FAM76B
INF2		CEP57
SIVA1		MTMR2
AKT1		MAML2
CEP170B		CCDC82
JAG2		CNTN5
NUDT14		TRPC6
BRF1		CEP126
BTBD6		BIRC2
PACS2		DCUN1D5
MTA1		DYNC2H1
CRIP2		LINC02552
TUFM		GRIA4
SH2B1		MSANTD4
NFATC2IP		KBTBD3
SPNS1		AASDHPPT
MAZ		PCDH9-AS1
CDIPT		PCDH9-AS2
SEZ6L2		KLHL1
ASPHD1		DACH1
KCTD13		MZT1
TMEM219		DIS3
TAOK2		PIBF1
INO80E		KLF12
DOC2A		TBC1D4
ALDOA		COMMD6
PPP4C		UCHL3
YPEL3		LMO7
MAPK3		FBXL3
CORO1A		MYCBP2
CD2BP2		SLAIN1
TBC1D10B		RBM26
ZNF771		NDFIP2
ZNF785		SPRY2
PRR14		SLITRK1
FBRS		MIR4500HG
PHKG2		SLITRK5
RNF40		GPC5
FBXL19		GPC6
SETD1A		GPR180
STX1B		DZIP1
KAT8		DNAJC3
FUS		UGGT2
VPS35		HS6ST3
C16orf87		MBNL2
GPT2		RAP2A
DNAJA2		IPO5
NETO2		FARP1
ITFG1		STK24
PHKB		DOCK9
LONP2		UBAC2
SIAH1		TM9SF2
N4BP1		CLYBL
HEATR3		PCCA
TENT4B		NALCN
BRD7		FGF14
CYLD		TPP2
CHD9		EFNB2
RBL2		ARGLU1
AKTIP		LIG4
RPGRIP1L		ABHD13
FTO		TNFSF13B
GNAO1		MYO16
AMFR		IRS2
NUDT21		COL4A2
OGFOD1		CARS2
BBS2		ANKRD10
MT3		ARHGEF7
MT2A		TUBGCP3
NUP93		ATP11A
HERPUD1		MCF2L
RSPRY1		PCID2
ARL2BP		CUL4A
CX3CL1		LAMP1
CIAPIN1		DCUN1D2
COQ9		TMCO3
POLR2C		TFDP1
KATNB1		GAS6
KIFC3		RASA3
CNGB1		CDC16
USB1		UPF3A
CSNK2A2		KCTD1
NDRG4		AQP4-AS1
CNOT1		CDH2
SLC38A7		B4GALT6
GOT2		TRAPPC8
CDH8		RNF138
CDH11		GAREM1
CMTM4		CCDC178
DYNC1LI2		ASXL3
VPS53		NOL4
GLOD4		DTNA
NXN		MAPRE2
ABR		ZNF397
YWHAE		ZSCAN30
CRK		ZNF24
PITPNA		GALNT1
SLC43A2		RPRD1A
PRPF8		SLC39A6
SERPINF1		ELP2
RPA1		FHOD3
RTN4RL1		TPGS2
SMG6		KIAA1328
SGSM2		CELF4
MNT		LINC01902
METTL16		PIK3C3
PAFAH1B1		RIT2
CLUH		SYT4
RAP1GAP2		SETBP1
ITGAE		EPG5
NCBP3		ATP5F1A
CAMKK1		C18orf25
ZZEF1		RNF165
CYB5D2		ST8SIA5
ANKFY1		PIAS2
UBE2G1		KATNAL2
SPNS2		SMAD2
MYBBP1A		ZBTB7C
PELP1		CTIF
ARRB2		DYM
PSMB6		MBD1
MINK1		CXXC1
SLC25A11		MAPK4
RNF167		ME2
PFN1		SMAD4
SPAG7		DCC
CAMTA2		MBD2
ZNF594		POLI
RABEP1		RAB27B
NUP88		TCF4
RPAIN		TXNL1
C1QBP		WDR7
NLRP1		ST8SIA3
PITPNM3		ONECUT2
KIAA0753		FECH
MED31		ATP8B1
ALOX12-AS1		NEDD4L
DLG4		MALT1
ACADVL		ZNF532
DVL2		LMAN1
EIF5A		CCBE1
GPS2		CDH20
NLGN2		PIGN
ZBTB4		ZCCHC2
POLR2A		PHLPP1
EIF4A1		BCL2
FXR2		KDSR
SAT2		VPS4B
ATP1B2		CDH7
EFNB3		TMX3
KDM6B		CCDC102B
NAA38		DOK6
CHD3		RTTN
PER1		SOCS6
VAMP2		CBLN2
CTC1		NETO1
NDEL1		CNDP2
MYH10		ZNF407
STX8		TSHZ1
CFAP52		ZNF516
USP43		ZNF236
GAS7		MBP
SHISA6		ATP9B
DNAH9		TXNL4A
MAP2K4		ADNP2
STAC2
FBXL20
MED1
CDK12
NEUROD2
PPP1R1B
STARD3
PGAP3
MIEN1
GSDMB
PSMD3
MED24
THRA
NR1D1
MSL1
CASC3
RAPGEFL1
WIPF2
KRT10
KRT17
EIF1
P3H4
NT5C3B
ACLY
CNP
DNAJC7
KAT2A
STAT5B
STAT3
ATP6V0A1
COASY
RETREG3
TUBG2
CNTNAP1
EZH1
COA3
BECN1
PSME3
RUNDC1
RPL27
NBR1
DHX8
DUSP3
MPP2
LSM12
HDAC5
TMUB2
ATXN7L3
UBTF
RUNDC3A
SLC25A39
FAM171A2
GPATCH8
ADAM11
EFTUD2
NMT1
DCAKD
HEXIM1
FMNL1
PLEKHM1
LINC02210-CRHR1
CRHR1
MAPT
KANSL1
ARL17B
LRRC37A2
ARL17A
NSF
WNT3
RPRML
CDC27
NPEPPS
KPNB1
TBKBP1
OSBPL7
SCRN2
CDK5RAP3
NFE2L1
CBX1
CALCOCO2
ATP5MC1
GRB2
TMEM94
TSEN54
SAP30BP
UNK
WBP2
ACOX1
SRP68
EXOC7
RNF157
UBALD2
QRICH2
PRPSAP1
UBE2O
MXRA7
JMJD6
SRSF2
MFSD11
MGAT5B
SEC14L1
TNRC6C
AFMID
PGS1
CYTH1
USP36
TIMP2
RBFOX3
GAA
SLC26A11
RNF213
ENDOV
NPTX1
RPTOR
BAIAP2
AATK
SLC38A10
BAHCC1
ACTG1
NPLOC4
HGS
MCRIP1
P4HB
ARHGDIA
ANAPC11
PCYT2
SIRT7
ASPSCR1
RAC3
DCXR
RFNG
GPS1
DUS1L
FASN
CCDC57
CSNK1D
NARF
FOXK2
WDR45B
RAB40B
TBCD
MIER2
C2CD4C
SHC2
CDC34
BSG
HCN2
RNF126
FSTL3
PALM
PTBP1
PLPPR3
MED16
R3HDM4
ARID3A
WDR18
TMEM259
ABCA7
POLR2E
GPX4
STK11
CBARP
ATP5F1D
CIRBP
NDUFS7
GAMT
DAZAP1
RPS15
APC2
C19orf25
MBD3
REXO1
KLF16
ABHD17A
CSNK1G2
BTBD2
MKNK2
AP3D1
PLEKHJ1
LSM7
SPPL2B
TIMM13
GNG7
DIRAS1
SGTA
THOP1
TLE2
GNA11
NCLN
CELF5
NFIC
DOHH
FZR1
MFSD12
PIP5K1C
MATK
ZFR2
ATCAY
DAPK3
EEF2
PIAS4
ZBTB7A
MAP2K2
SIRT6
ANKRD24
FSD1
SH3GL1
UBXN6
HDGFL2
SEMA6B
TNFAIP8L1
MYDGF
DPP9
KDM4B
PTPRS
SAFB2
SAFB
RPL36
LONP1
RANBP3
RFX2
MLLT1
GTF2F1
KHSRP
SLC25A23
TUBB4A
INSR
ZNF358
PNPLA6
CAMSAP3
EVI5L
PRR36
MAP2K7
TGFBR3L
CTXN1
TIMM44
ELAVL1
CERS4
RPS28
RAB11B
HNRNPM
ADAMTS10
ZNF562
ZNF846
UBL5
PIN1
OLFM2
COL5A3
P2RY11
DNMT1
MRPL4
ICAM5
ZGLP1
TYK2
CDC37
PDE4A
KEAP1
ATG4D
CDKN2D
SLC44A2
ILF3
QTRT1
DNM2
CARM1
YIPF2
SMARCA4
PLPPR2
PRKCSH
ELAVL3
ECSIT
ELOF1
ZNF439
ZNF44
ZNF791
DHPS
TNPO2
TRIR
HOOK2
MAST1
FARSA
CALR
RAD23A
GADD45GIP1
NFIX
TRMT1
NACC1
STX10
CACNA1A
MRI1
C19orf53
CC2D1A
RFX1
PRKACA
ADGRL1
PKN1
GIPC1
DNAJB1
TECR
NDUFB7
BRD4
AKAP8
AKAP8L
TPM4
FAM32A
AP1M1
EPS15L1
TMEM38A
SIN3B
MYO9B
NR2F6
ABHD8
MRPL34
DDA1
ANO8
SLC27A1
COLGALT1
UNC13A
MAP1S
FCHO1
CCDC124
KCNN1
MAST3
RAB3A
JUND
LSM4
PGPEP1
SSBP4
FKBP8
KXD1
UBA52
CRLF1
REX1BD
TMEM59L
CRTC1
UPF1
COPE
SUGP2
SLC25A42
TMEM161A
NCAN
HAPLN4
SUGP1
MAU2
YJEFN3
ATP13A1
ZNF253
ZNF90
ZNF737
ZNF714
ZNF431
ZNF708
ZNF493
ZNF429
ZNF100
ZNF43
ZNF208
ZNF91
ZNF675
ZNF254
LINC00662
UQCRFS1
VSTM2B
C19orf12
URI1
TSHZ3
ZNF507
DPY19L3
PDCD5
ANKRD27
CEP89
LRP3
CEBPG
PEPD
LSM14A
GPI
UBA2
SCGB2B2
ZNF302
GRAMD1A
SCN1B
LGI4
FXYD1
FXYD7
USF2
TMEM147
COX6B1
KMT2B
ARHGAP33
APLP1
ALKBH6
CLIP3
TBCB
CAPNS1
ZNF565
ZNF146
ZFP14
ZFP82
ZNF566
ZNF529
ZNF382
ZNF461
ZNF345
ZNF568
ZNF420
ZNF793
ZNF540
ZFP30
ZNF573
SIPA1L3
DPF1
YIF1B
PSMD8
FAM98C
RYR1
EIF3K
ACTN4
ECH1
HNRNPL
SIRT2
FBXO27
LRFN1
SAMD4B
MED29
RPS16
SUPT5H
TIMM50
DYRK1B
PSMC4
ZNF780B
MAP3K10
TTC9B
AKT2
PLD3
SPTBN4
LTBP4
NUMBL
HNRNPUL1
RPS19
RABAC1
ATP1A3
GRIK5
POU2F2
DEDD2
GSK3A
CIC
PAFAH1B3
TMEM145
MEGF8
LIPE-AS1
ZNF428
CADM4
SMG9
ZNF283
ZNF155
ZNF224
ZNF235
CEACAM19
TOMM40
APOE
CLPTM1
CLASRP
MARK4
ERCC1
RTN2
EML2
SNRPD2
DMPK
SYMPK
MYPOP
NOVA2
IGFL4
PPP5C
PNMA8A
CALM3
DACT3
STRN4
AP2S1
ARHGAP35
TMEM160
ZC3H4
SAE1
INAFM1
DHX34
MEIS3
SLC8A2
NAPA
SELENOW
PLA2G4C
KDELR1
LMTK3
RPL18
SPHK2
DBP
CA11
BCAT2
PPP1R15A
NUCB1
FTL
GYS1
SNRNP70
LIN7B
PPFIA3
SLC17A7
PIH1D1
RPL13A
RPS11
PRR12
SCAF1
PRMT1
CPT1C
AP2A1
MED25
PTOV1
TBC1D17
VRK3
MYH14
KCNC3
NR1H2
EMC10
LRRC4B
SYT3
SHANK1
IGLON5
ZNF577
ZNF432
PPP2R1A
ZNF83
ZNF611
ZNF160
ZNF331
MYADM
PRKCG
CACNG7
CACNG8
NDUFA3
PRPF31
CNOT3
MBOAT7
RPS9
TTYH1
LENG8
PPP1R12C
SYT5
PPP6R1
HSPBP1
BRSK1
RPL28
SHISA7
ISOC2
NAT14
CCDC106
U2AF2
EPN1
ZNF444
ZSCAN5A
ZNF583
ZNF667
ZNF667-AS1
ZNF471
ZNF264
ZNF549
ZNF586
ZNF814
ZNF587
ZNF135
ZSCAN18
ZNF544
RPS5
TRIM28
CHMP2A
UBE2M
MZF1
ZNF341
CHMP4B
RALY
EIF2S2
ITCH
DYNLRB1
MAP1LC3A
PIGU
NCOA6
GGT7
ACSS2
GSS
TRPC4AP
MMP24
UQCC1
CEP250
ERGIC3
CPNE1
RBM39
PHF20
SCAND1
NORAD
EPB41L1
DLGAP4
NDRG3
SOGA1
RBL1
MROH8
RPN2
MANBAL
SRC
BLCAP
NNAT
CTNNBL1
VSTM2L
TTI1
RPRD1B
RALGAPB
PPP1R16B
DHX35
TOP1
PLCG1
ZHX3
CHD6
PTPRT
SRSF6
IFT52
TOX2
GDAP1L1
SERINC3
PKIG
RIMS4
YWHAB
TOMM34
STK4
KCNS1
PIGT
DNTTIP1
ACOT8
CTSA
ZNF335
SLC12A5
NCOA5
CDH22
SLC35C2
ELMO2
SLC13A3
ZMYND8
NCOA3
PREX1
ARFGEF2
CSE1L
STAU1
DDX27
ZNFX1
KCNB1
B4GALT5
SLC9A8
SPATA2
RNF114
CEBPB
PTPN1
BCAS4
ADNP
DPM1
ATP9A
ZFP64
TSHZ2
PFDN4
DOK5
CBLN4
RAE1
PMEPA1
RAB22A
VAPB
NPEPL1
GNAS
NELFCD
ATP5F1E
ZNF831
PHACTR3
SYCP2
FAM217B
MIR646HG
CDH4
TAF4
LSM14B
PSMA7
SS18L1
MTG2
HRH3
OSBPL2
ADRM1
LAMA5
OGFR
DIDO1
GID8
YTHDF1
ARFGAP1
CHRNA4
KCNQ2
EEF1A2
PPDPF
STMN3
ARFRP1
ZBTB46
TPD52L2
DNAJC5
ZNF512B
PRPF6
TCEA2
PCMTD2
ATP6V1E1
BCL2L13
BID
MICAL3
PEX26
TMEM191B
DGCR5
DGCR2
HIRA
TXNRD2
COMT
TANGO2
DGCR8
TRMT2A
RANBP1
ZDHHC8
RTN4R
DGCR6L
KLHL22
MED15
PI4KA
SNAP29
CRKL
LZTR1
THAP7
P2RX6
HIC2
UBE2L3
PPIL2
YPEL1
MAPK1
PPM1F
TOP3B
ZNF280B
GNAZ
BCR
CHCHD10
SMARCB1
DDT
CABIN1
SNRPD3
SGSM1
KIAA1671
GRK3
SEZ6L
ASPHD2
HPS4
TPST2
MIAT
MIATNB
PITPNB
TTC28
CCDC117
ZNRF3
RHBDD3
EWSR1
GAS2L1
RASL10A
AP1B1
RFPL1S
NEFH
NF2
UQCR10
ASCC2
MTMR3
DUSP18
OSBP2
RNF185
DRG1
EIF4ENIF1
SFI1
PISD
PRR14L
DEPDC5
YWHAH
RFPL2
SLC5A4-AS1
RTCB
FBXO7
SYN3
TIMP3
LARGE1
HMGXB4
TOM1
RASD2
RBFOX2
APOL2
MYH9
TXN2
CACNG2
KCTD17
ELFN2
GGA1
LGALS1
GCAT
ANKRD54
EIF3L
POLR2F
PICK1
BAIAP2L2
TMEM184B
CSNK1E
TPTEP2-CSNK1E
KCNJ4
DDX17
FAM227A
CBY1
TOMM22
JOSD1
GTPBP1
SUN2
NPTXR
CBX6
CBX7
RPL3
SYNGR1
TAB1
MGAT3
ATF4
RPS19BP1
CACNA1I
TNRC6B
SGSM3
MRTFA
SLC25A17
ST13
XPNPEP3
RBX1
EP300
L3MBTL2
RANGAP1
ZC3H7B
TEF
TOB2
ACO2
POLR3H
PMM1
DESI1
XRCC6
SNU13
SREBF2
WBP2NL
SMDT1
TCF20
RRP7A
CYB5R3
ARFGAP3
PACSIN2
TTLL1
TTLL12
MPPED1
EFCAB6
SULT4A1
PARVB
NUP50-DT
NUP50
KIAA0930
FAM118A
ATXN10
MIRLET7BHG
TRMU
GRAMD4
CERK
TBC1D22A
BRD1
PIM3
PANX2
TRABD
SELENOO
TUBGCP6
HDAC10
MAPK12
MAPK11
PLXNB2
DENND6B
PPP6R2
SBF1
LMF2
NCAPH2
MAPK8IP2
ARSA
SHANK3
RABL2B

## Sheet: Pathway enrichment
Table.S3. Lists of genes located at the predicted copy number alteration regions in Sub-clusters 5 and the pathway enrichment analysis
Pathway enrichment analysis with genes lcoated at predicted CNV gain regions									Pathway enrichment analysis with genes lcoated at predicted CNV loss regions
Index	Name	P-value	Adjusted p-value	Odds Ratio	Combined score				Index	Name	P-value	Adjusted p-value	Odds Ratio	Combined score
1	Apical Junction	4.315e-05	0.001057	2.25	22.59				1	UV Response Dn	0.0008838	0.03258	2.65	18.62
2	Myc Targets V1	4.315e-05	0.001057	2.25	22.59				2	Androgen Response	0.001955	0.03258	2.88	17.98
3	Mitotic Spindle	0.0001981	0.003236	2.11	17.97				3	Reactive Oxygen Species Pathway	0.006426	0.06426	3.51	17.72
4	PI3K/AKT/mTOR Signaling	0.0009859	0.008051	2.4	16.6				4	Mitotic Spindle	0.00192	0.03258	2.24	14
5	Oxidative Phosphorylation	0.0004677	0.005729	2.02	15.48				5	Hypoxia	0.004676	0.05845	2.09	11.23
6	Adipogenesis	0.0009675	0.008051	1.95	13.5				6	Estrogen Response Early	0.01017	0.08476	1.96	9.01
7	DNA Repair	0.001865	0.01305	2.04	12.82				7	mTORC1 Signaling	0.0209	0.1493	1.84	7.1
8	UV Response Up	0.007565	0.04634	1.82	8.91
9	Wnt-beta Catenin Signaling	0.0314	0.1109	2.39	8.27
10	Protein Secretion	0.02412	0.09848	1.88	7.01
11	Cholesterol Homeostasis	0.03169	0.1109	1.97	6.79
12	Myogenesis	0.02156	0.09602	1.59	6.1
13	p53 Pathway	0.02156	0.09602	1.59	6.1
14	heme Metabolism	0.02156	0.09602	1.59	6.1
15	Pperoxisome	0.04516	0.1383	1.71	5.3
16	mTORC1 Signaling	0.03591	0.1173	1.52	5.06
