# Supplementary material for: Neuronal cell cycle reentry events in the aging brain are more prevalent in neurodegeneration and lead to cellular senescence
Source: PLoS Biol. 2024 Apr 23;22(4):e3002559. doi: 10.1371/journal.pbio.3002559 (PMC11037540; doi:10.1371/journal.pbio.3002559)
Supplement: S4 Table — (XLSX) [file pbio.3002559.s028.xlsx]

## Sheet: C3 
Table S4. Over-represented cell cycle genes in sub-clusters 3 and 5 and corresponding pathway enrichment analyses
Sub-cluster 3
Cell cycle gene symbols			Pathway enrichment anlaysis
AAAS			Term	Overlap	P-value	Adjusted P-value	Old P-value	Old Adjusted P-value	Odds Ratio	Combined Score	Genes
ABL1			E2F Targets	17/200	1.33167e-20	3.46233e-19	0	0	42.6826	1953.38	GINS1;TOP2A;GINS3;GINS4;HMMR;BRCA1;CENPE;CCNB2;WEE1;ESPL1;CHEK2;POLD1;KIF2C;MYBL2;TP53;SPC24;SPC25
ACD			G2-M Checkpoint	15/200	2.10728e-17	2.73947e-16	0	0	35.5946	1366.78	TOP2A;GINS2;NUMA1;KNL1;HMMR;CENPE;TPX2;CCNB2;CDC45;ESPL1;EXO1;ABL1;E2F2;KIF2C;MYBL2
ATRIP			Mitotic Spindle	10/199	3.70952e-10	3.21492e-09	0	0	20.9005	453.854	TOP2A;CENPE;TPX2;CCNB2;ESPL1;NUMA1;CEP131;ABL1;TUBGCP6;KIF2C
BRCA1			Spermatogenesis	4/135	0.000722442	0.00469587	0	0	10.801	78.1221	CCNB2;DMC1;KIF2C;NCAPH
CCNB2			Apoptosis	4/161	0.00138937	0.00722475	0	0	9.00045	59.2131	TOP2A;WEE1;CDK2;BRCA1
CCND3			Apical Surface	1944-02-01	0.00772143	0.0334595	0	0	16.3366	79.4573	LYN;BRCA1
CDC25C			DNA Repair	3/150	0.010357	0.0384689	0	0	7.08665	32.3866	POLD1;AAAS;TP53
CDC45			UV Response Up	3/158	0.0119142	0.0387211	0	0	6.71817	29.7617	LYN;CCND3;CDK2
CDK2			Allograft Rejection	3/200	0.0222156	0.0641784	0	0	5.27465	20.0804	LYN;CCND3;BRCA1
CENPE			Interferon Alpha Response	1997-02-01	0.0343486	0.0893063	0	0	7.20327	24.2836	PSME2;PSMB8
CENPH			Wnt-beta Catenin Signaling	1942-01-01	0.118666	0.196673	0	0	8.22613	17.5335	TP53
CEP131			Estrogen Response Late	2/200	0.121029	0.196673	0	0	3.43817	7.26047	TOP2A;GINS2
CHEK2			Interferon Gamma Response	2/200	0.121029	0.196673	0	0	3.43817	7.26047	PSME2;PSMB8
CLSPN			Myc Targets V1	2/200	0.121029	0.196673	0	0	3.43817	7.26047	CDC45;CDK2
DHFR			p53 Pathway	2/200	0.121029	0.196673	0	0	3.43817	7.26047	CCND3;TP53
DMC1			heme Metabolism	2/200	0.121029	0.196673	0	0	3.43817	7.26047	CCND3;E2F2
E2F2			Androgen Response	1/100	0.260068	0.371057	0	0	3.39685	4.57491	CCND3
ESCO2			Pperoxisome	1/104	0.268953	0.371057	0	0	3.26428	4.28671	TOP2A
ESPL1			PI3K/AKT/mTOR Signaling	1/105	0.271157	0.371057	0	0	3.23272	4.21889	CDK2
EXO1			Fatty Acid Metabolism	1/158	0.379101	0.453333	0	0	2.1357	2.07153	NCAPH2
FKBP6			IL-2/STAT5 Signaling	1/199	0.451671	0.453333	0	0	1.68995	1.34317	CCND3
GINS1			Complement	1/200	0.453333	0.453333	0	0	1.68137	1.33018	LYN
GINS2			mTORC1 Signaling	1/200	0.453333	0.453333	0	0	1.68137	1.33018	DHFR
GINS3			Inflammatory Response	1/200	0.453333	0.453333	0	0	1.68137	1.33018	LYN
GINS4			Glycolysis	1/200	0.453333	0.453333	0	0	1.68137	1.33018	HMMR
HAUS7			KRAS Signaling Up	1/200	0.453333	0.453333	0	0	1.68137	1.33018	PSMB8
HMMR
KIF2C
KNL1
LYN
MYBL2
NCAPH
NCAPH2
NUMA1
NUP188
ORC1
PCBP4
PIAS4
POLD1
PPP2R3B
PRDM9
PSMB8
PSME2
PTK6
SGO2
SKA1
SPC24
SPC25
SYCE3
SYNE2
TEN1
TERT
TOP2A
TP53
TPX2
TUBB1
TUBGCP6
WEE1
WRAP53

## Sheet: C5
Table.S4. Over-represented cell cycle genes in sub-clusters 3 and 5 and corresponding pathway enrichment analyses
Sub-cluster 5
Cell cycle gene symbols			Pathway enrichment anlaysis
Gene symbol			Term	Overlap	P-value	Adjusted P-value	Old P-value	Old Adjusted P-value	Odds Ratio	Combined Score	Genes
ACTR1A			G2-M Checkpoint	29/200	3.7881e-23	8.14442e-22	0	0	15.8204	816.768	CDKN1B;CENPA;SMC2;CKS1B;PTTG1;MYC;RAD21;E2F1;NEK2;FBXO5;KMT5A;BUB3;E2F4;TMPO;PLK4;CDKN2C;ATRX;RPA2;CDC6;SMC1A;INCENP;DKC1;UBE2S;CDK4;NUP50;MCM3;KPNB1;PAFAH1B1;MAD2L1
AKT1			E2F Targets	29/200	3.7881e-23	8.14442e-22	0	0	15.8204	816.768	CDKN1A;CDKN1B;PCNA;CCP110;CKS1B;PTTG1;MYC;RAD21;POLD2;RBBP7;TMPO;PLK4;CDKN2C;RFC2;TUBB;RPA1;RPA2;TUBG1;SMC1A;POLE4;RAD50;CCNE1;UBE2S;CDK4;MCM3;MCM4;RAD1;RAN;MAD2L1
ANAPC11			Myc Targets V1	28/200	5.94812e-22	8.52564e-21	0	0	15.1133	738.645	YWHAE;SET;PCNA;HSP90AB1;PSMA7;PSMD8;PSMD7;PSMB2;YWHAQ;PSMB3;MYC;RUVBL2;PSMD3;POLD2;PSMD1;BUB3;NPM1;PSMA4;PSMC6;PSMA2;PSMC4;CDK4;POLE3;NHP2;MCM4;KPNB1;RAN;MAD2L1
ANAPC15			DNA Repair	16/150	3.46295e-11	3.72267e-10	0	0	10.5091	253.125	PCNA;RFC2;CETN2;RPA2;RBX1;POLE4;POLD4;POLR2A;POLR2C;POLR2D;POLR2E;POLR2G;POLR2I;POLR2J;RAE1;POLR2K
ANKLE2			Mitotic Spindle	14/199	1.28379e-07	9.78917e-07	0	0	6.58412	104.479	YWHAE;DYNC1H1;SUN2;TUBGCP2;CSNK1D;SMC1A;DYNLL2;CKAP5;TUBA4A;INCENP;NEK2;FBXO5;MAPRE1;PAFAH1B1
ARPP19			mTORC1 Signaling	14/200	1.36593e-07	9.78917e-07	0	0	6.54839	103.506	RAB1A;CDKN1A;PSMD12;PSMD13;RPA1;TUBG1;TUBA4A;PSMA4;PSMB5;PSMC6;PSMC4;PSME3;PSMC2;MCM4
ATRX			PI3K/AKT/mTOR Signaling	10/105	5.25875e-07	3.23038e-06	0	0	9.03976	130.699	CDKN1A;CDKN1B;PRKCB;CDK4;YWHAB;CSNK2B;UBE2N;E2F1;AKT1;MAPK1
B9D2			Unfolded Protein Response	8/113	6.4367e-05	0.000345973	0	0	6.48312	62.568	NPM1;TUBB2A;DKC1;DCTN1;NHP2;BANF1;YWHAZ;CKS1B
BABAM1			Myc Targets V2	1958-05-01	0.000639313	0.00305449	0	0	7.94549	58.44	PLK4;NPM1;CDK4;MYC;MCM4
BANF1			Notch Signaling	1932-03-01	0.0064728	0.027833	0	0	8.64933	43.5939	FBXW11;SKP1;RBX1
BUB3			Allograft Rejection	7/200	0.0104332	0.0407843	0	0	3.05914	13.9581	NPM1;CCND2;PRKCB;UBE2N;AKT1;UBE2D1;PSMB10
CCNA1			UV Response Up	6/158	0.0119347	0.0427659	0	0	3.32206	14.7111	CDKN1C;PSMC3;CCNE1;POLE3;PRKACA;TUBA4A
CCNB1			Wnt-beta Catenin Signaling	1942-03-01	0.0137307	0.0454168	0	0	6.42829	27.5653	CCND2;MYC;CSNK1E
CCND2			IL-2/STAT5 Signaling	6/199	0.0326853	0.100391	0	0	2.61087	8.93133	CDKN1C;CCND2;CCNE1;MYC;CDC6;PHLDA1
CCNE1			Apoptosis	5/161	0.0443191	0.127048	0	0	2.68532	8.36837	CCNA1;CDKN1A;CCND2;CDKN1B;PPP2R5B
CCP110			Spermatogenesis	4/135	0.0788271	0.209109	0	0	2.55059	6.47978	CCNA1;CSNK2A2;NEK2;TOPBP1
CDC23			Interferon Gamma Response	5/200	0.0923971	0.209109	0	0	2.14398	5.10624	CDKN1A;PSMB2;PSMA2;PSME1;PSMB10
CDC26			Glycolysis	5/200	0.0923971	0.209109	0	0	2.14398	5.10624	PPP2CB;KIF2A;PSMC4;ARPP19;CENPA
CDC6			p53 Pathway	5/200	0.0923971	0.209109	0	0	2.14398	5.10624	CDKN1A;PCNA;CCND2;MDM2;CCP110
CDCA5			Androgen Response	3/100	0.117935	0.248523	0	0	2.57697	5.5086	UBE2I;AKT1;CENPN
CDK4			Fatty Acid Metabolism	4/158	0.121372	0.248523	0	0	2.16712	4.57023	HSP90AA1;PSME1;KMT5A;YWHAH
CDKN1A			TNF-alpha Signaling via NF-kB	4/200	0.217761	0.425625	0	0	1.69909	2.59001	CDKN1A;TUBB2A;MYC;PHLDA1
CDKN1B			UV Response Dn	3/144	0.247545	0.462802	0	0	1.76884	2.46959	CDKN1B;MYC;ATRX
CDKN1C			Protein Secretion	1996-02-01	0.318649	0.570912	0	0	1.7656	2.01925	RAB2A;MAPK1
CDKN2C			Angiogenesis	1936-01-01	0.351551	0.576183	0	0	2.36807	2.47558	CCND2
CDKN2D			Hypoxia	3/200	0.428788	0.576183	0	0	1.26241	1.069	CDKN1C;CDKN1A;CDKN1B
CDT1			Adipogenesis	3/200	0.428788	0.576183	0	0	1.26241	1.069	CDKN2C;UBC;YWHAG
CENPA			Estrogen Response Late	3/200	0.428788	0.576183	0	0	1.26241	1.069	PLK4;CCNA1;CDC6
CENPN			Apical Junction	3/200	0.428788	0.576183	0	0	1.26241	1.069	SRC;TUBG1;YWHAH
CENPX			Complement	3/200	0.428788	0.576183	0	0	1.26241	1.069	PPP2CB;KIF2A;SRC
CEP41			Xenobiotic Metabolism	3/200	0.428788	0.576183	0	0	1.26241	1.069	ARPP19;LPIN2;PSMB10
CETN2			heme Metabolism	3/200	0.428788	0.576183	0	0	1.26241	1.069	PPP2R5B;LPIN2;OPTN
CHMP2A			Reactive Oxygen Species Pathway	1949-01-01	0.445555	0.580572	0	0	1.72558	1.39502	CDKN2D
CHMP2B			TGF-beta Signaling	1954-01-01	0.477982	0.604506	0	0	1.56239	1.15333	CDKN1C
CHMP3			Interferon Alpha Response	1997-01-01	0.689308	0.783874	0	0	0.860688	0.320234	PSME1
CHMP4B			Estrogen Response Early	2/200	0.692726	0.783874	0	0	0.833781	0.306099	TUBB2B;MYC
CHMP6			Myogenesis	2/200	0.692726	0.783874	0	0	0.833781	0.306099	CDKN1A;SIRT2
CHMP7			Inflammatory Response	2/200	0.692726	0.783874	0	0	0.833781	0.306099	CDKN1A;MYC
CHTF8			Pperoxisome	1/104	0.714505	0.787788	0	0	0.801909	0.269574	YWHAH
CKAP5			Bile Acid Metabolism	1/112	0.740819	0.796381	0	0	0.743811	0.223142	OPTN
CKS1B			Coagulation	1/138	0.810766	0.850315	0	0	0.601852	0.126254	SIRT2
CNEP1R1			KRAS Signaling Up	1/200	0.910766	0.910766	0	0	0.413032	0.0386057	CCND2
CSNK1D			KRAS Signaling Dn	1/200	0.910766	0.910766	0	0	0.413032	0.0386057	CCNA1
CSNK1E
CSNK2A1
CSNK2A2
CSNK2B
CTDNEP1
DAXX
DCTN1
DCTN2
DCTN3
DKC1
DYNC1H1
DYNC1LI1
DYNC1LI2
DYNLL1
DYNLL2
E2F1
E2F4
EMD
ENSA
FBXL18
FBXO5
FBXW11
FKBPL
FZR1
GAR1
GOLGA2
GORASP1
GORASP2
HAUS2
HSP90AA1
HSP90AB1
INCENP
IST1
KAT5
KIF2A
KMT5A
KPNB1
LPIN2
MAD2L1
MAPK1
MAPK3
MAPRE1
MCM3
MCM4
MDM2
MYC
MZT1
MZT2A
MZT2B
NDEL1
NEK2
NHP2
NOP10
NPM1
NUDC
NUP155
NUP42
NUP50
OPTN
PAFAH1B1
PCNA
PHLDA1
PLK4
POLD2
POLD4
POLE3
POLE4
POLR2A
POLR2B
POLR2C
POLR2D
POLR2E
POLR2G
POLR2I
POLR2J
POLR2K
POLR2L
PPME1
PPP1CC
PPP2CA
PPP2CB
PPP2R1A
PPP2R5B
PPP2R5C
PPP2R5D
PPP2R5E
PPP6C
PRKACA
PRKCB
PSMA2
PSMA4
PSMA5
PSMA7
PSMB1
PSMB10
PSMB2
PSMB3
PSMB4
PSMB5
PSMB6
PSMB7
PSMC1
PSMC2
PSMC3
PSMC4
PSMC5
PSMC6
PSMD1
PSMD10
PSMD11
PSMD12
PSMD13
PSMD2
PSMD3
PSMD4
PSMD6
PSMD7
PSMD8
PSME1
PSME3
PTTG1
RAB1A
RAB1B
RAB2A
RAB8A
RAD1
RAD21
RAD50
RAE1
RAN
RANBP2
RANGAP1
RBBP4
RBBP7
RBX1
RCC2
RFC2
RHNO1
RMI1
RNF168
RNF8
RPA1
RPA2
RPS27
RPS27A
RSF1
RUVBL2
SEH1L
SET
SIRT2
SKA2
SKP1
SMARCA5
SMC1A
SMC2
SPDL1
SRC
SSNA1
SUMO1
SUN2
TAOK1
TERF2
TERF2IP
TINF2
TMPO
TOPBP1
TUBA1A
TUBA1B
TUBA3D
TUBA4A
TUBB
TUBB2A
TUBB2B
TUBB3
TUBB4A
TUBB4B
TUBG1
TUBG2
TUBGCP2
TUBGCP4
UBA52
UBB
UBC
UBE2D1
UBE2I
UBE2N
UBE2S
UBE2V2
VPS4A
YWHAB
YWHAE
YWHAG
YWHAH
YWHAQ
YWHAZ
ZNF385A
