# Supplementary material for: Neuronal cell cycle reentry events in the aging brain are more prevalent in neurodegeneration and lead to cellular senescence
Source: PLoS Biol. 2024 Apr 23;22(4):e3002559. doi: 10.1371/journal.pbio.3002559 (PMC11037540; doi:10.1371/journal.pbio.3002559)
Supplement: S5 Table — (XLSX) [file pbio.3002559.s029.xlsx]

## Sheet: Sheet1
Table.S5. Cellular senescence gene lists extracted from multiple databases and independent studies.
55 senescence signature provided by Hernandez-Segura et al. [1]			Senescence genes (SnGs) from Xu et al. [2]			Senescence genes from CellAge database			SenMayo from Saul et al. [3]		Senescence genes from Casella et al. [4]			Senescence genes from KEGG (hsa04218)			Senescence genes from Reactome (R-HSA-2559583)			Senescence-associated secretory phenotype
GeneNames	Group		ABI3			AAK1			ACVR1B		TMEM159	Down		AKT1			ACD			Group	GroupName	GeneSymobl	MolecularName
NFIA	Down		ARPC1B			ABI3			ANG		TNFSF13B	Down		AKT2			AGO1			Group1_1	Interleukins	IL6	IL6
KCTD3	Down		BCL6			ACLY			ANGPT1		SLC9A7	Down		AKT3			AGO3			Group1_1	Interleukins	IL7	IL7
EFNB3	Down		BHLHE40			ADCK5			ANGPTL4		STAT1	Down		ATM			AGO4			Group1_1	Interleukins	IL1A	IL1A
USP6NL	Down		CDK4			AGT			AREG		WDR78	Down		ATR			ANAPC1			Group1_1	Interleukins	IL1B	IL1B
ARHGAP35	Down		CDKN1A			AKR1B1			AXL		SLC16A14	Down		BTRC			ANAPC10			Group1_1	Interleukins	IL13	IL13
SMO	Down		CEBPB			AKT1			BEX3		JCAD	Down		CACNA1D			ANAPC11			Group1_1	Interleukins	IL15	IL15
MEIS1	Down		CTNNAL1			ALOX15B			BMP2		SRPX2	Down		CALM1			ANAPC15			Group1_2	Chemokines	CXCL8	IL8
SPIN4	Down		CXCL1			AR			BMP6		ELMOD1	Down		CALM2			ANAPC16			Group1_2	Chemokines	CXCL1	GRO-a
PATZ1	Down		CYR61			ARPC1B			C3		ARRDC4	Down		CALM3			ANAPC2			Group1_2	Chemokines	CXCL2	GRO-b
SPATA6	Down		EPHA3			ASF1A			CCL1		PAM	Down		CALML3			ANAPC4			Group1_2	Chemokines	CXCL3	GRO-c
CNTLN	Down		ERRFI1			ASPH			CCL13		NCSTN	Down		CALML4			ANAPC5			Group1_2	Chemokines	CCL8	MCP-2
GSTM4	Down		ETS1			ATF7IP			CCL16		FAM234B	Down		CALML5			ANAPC7			Group1_2	Chemokines	CCL7	MCP-3
PCIF1	Down		ETS2			ATM			CCL2		CCND3	Down		CALML6			ASF1A			Group1_2	Chemokines	CCL13	MCP-4
STAG1	Down		FOS			AURKA			CCL20		TAP1	Down		CAPN1			ATM			Group1_2	Chemokines	CCL3	MIP-1a
ZC3H4	Down		GNG11			AXL			CCL24		CHPF2	Down		CAPN2			BMI1			Group1_2	Chemokines	CCL20	MIP-3a
ICE1	Down		ID1			BAG3			CCL26		SLCO2B1	Down		CCNA1			CABIN1			Group1_2	Chemokines	CCL16	HCC-4
CREBBP	Down		IGFBP3			BCL6			CCL3		CLSTN2	Down		CCNA2			CBX2			Group1_2	Chemokines	CCL11	Eotaxin
PDS5B	Down		ING1			BHLHE40			CCL3L1		CLDN1	Down		CCNB1			CBX4			Group1_2	Chemokines	CCL26	Eotaxin-3
ASCC1	Down		IRF5			BLK			CCL4		BLCAP	Down		CCNB2			CBX6			Group1_2	Chemokines	CCL25	TECK
ARID2	Down		IRF7			BLVRA			CCL5		TMEM59	Down		CCNB3			CBX8			Group1_2	Chemokines	CXCL5	ENA-78
C2CD5	Down		ITGB4			BMI1			CCL7		SAMD9L	Down		CCND1			CCNA1			Group1_2	Chemokines	CXCL6	GCP-2
TRDMT1	Down		ITPKB			BRAF			CCL8		LRP10	Down		CCND2			CCNA2			Group1_2	Chemokines	CCL1	I-309
RHNO1	Down		LGALS3			BRCA1			CD55		KIAA1671	Down		CCND3			CCNE1			Group1_2	Chemokines	CXCL11	I-TAC
SCOC	Up		MAP2K3			BRD7			CD9		TNFRSF10C	Down		CCNE1			CCNE2			Group1_2	Chemokines	CXCL12	SDF-1
SUSD6	Up		MAP3K6			BTG3			CSF1		SMCO3	Down		CCNE2			CDC16			Group1_2	Chemokines	CXCL4	PF-4
CHMP5	Up		MCL1			CAV1			CSF2		RND3	Down		CDC25A			CDC23			Group1_3	other inflammatory factors	CSF2	GM-CSF
TOLLIP	Up		MYC			CAVIN1			CSF2RB		DHRS7	Down		CDK1			CDC26			Group1_3	other inflammatory factors	CSF3	G-CSF
UFM1	Up		NEK6			CBX7			CST4		SRPX	Down		CDK2			CDC27			Group1_3	other inflammatory factors	CSF1	M-CSF
SLC10A3	Up		NINJ1			CBX8			CTNNB1		GPR155	Down		CDK4			CDK2			Group1_3	other inflammatory factors	IFNG	INF-γ
ADPGK	Up		NOTCH3			CCND1			CTSB		TMEM30A	Down		CDK6			CDK4			Group1_3	other inflammatory factors	CXCL13	BLC
ZBTB7A	Up		PIK3R5			CDK1			CXCL1		BMS1P9	Down		CDKN1A			CDK6			Group1_3	other inflammatory factors	MIF	MIF
ZNHIT1	Up		PIM1			CDK18			CXCL10		FILIP1L	Down		CDKN2A			CDKN1A			Group2	Growth factor and regulators	AREG	Amphiregulin
DDA1	Up		PML			CDK2AP1			CXCL12		MT-TA	Down		CDKN2B			CDKN1B			Group2	Growth factor and regulators	EREG	Epiregulin
DYNLT3	Up		PRKCH			CDK4			CXCL16		POFUT2	Down		CHEK1			CDKN2A			Group2	Growth factor and regulators	NRG1	Heregulin
POFUT2	Up		PRMT6			CDK6			CXCL2		MT-TN	Down		CHEK2			CDKN2B			Group2	Growth factor and regulators	EGF	EGF
B4GALT7	Up		PSMD14			CDKN1A			CXCL3		PLOD1	Down		CXCL8			CDKN2C			Group2	Growth factor and regulators	FGF2	bFGF
TAF13	Up		RUNX1			CDKN1B			CXCL8		PDLIM1	Down		E2F1			CDKN2D			Group2	Growth factor and regulators	HGF	HGF
TMEM87B	Up		SERPINE1			CDKN1C			CXCR2		SARAF	Down		E2F2			CEBPB			Group2	Growth factor and regulators	FGF7	KGF(FGF7)
FAM214B	Up		SNAI1			CDKN2A			DKK1		DIO2	Down		E2F3			CXCL8			Group2	Growth factor and regulators	VEGFA	VEGF
P4HA2	Up		STK40			CDKN2AIP			EDN1		WDR63	Down		E2F4			E2F1			Group2	Growth factor and regulators	ANG	Angiogenin
NOL3	Up		SYK			CDKN2B			EGF		LINC02154	Down		E2F5			E2F2			Group2	Growth factor and regulators	PIGF	PIGF
ACADVL	Up		TBX2			CEBPB			EGFR		MAP4K3-DT	Down		EIF4EBP1			E2F2			Group2	Growth factor and regulators	NGF	NGF
GBE1	Up		TGFB1I1			CENPA			EREG		MT-TC	Down		ETS1			E2F3			Group2	Growth factor and regulators	IGFBP2	IGFBP-2
KLC1	Up		TLR3			CHEK1			ESM1		MT-TY	Down		FBXW11			EED			Group2	Growth factor and regulators	IGFBP3	IGFBP-3
BCL2L2	Up		TP53			CKB			ETS2		TM4SF1-AS1	Down		FOXM1			EHMT1			Group2	Growth factor and regulators	IGFBP4	IGFBP-4
DGKA	Up		UBTD1			CPEB1			FAS		PTCHD4	Down		FOXO1			EHMT2			Group2	Growth factor and regulators	IGFBP7	IGFBP-7
RAI14	Up		VEGFA			CSNK1A1			FGF1		AC002480.1	Down		FOXO3			EHMT2			Group2	Growth factor and regulators	IGFBP6	IGFBP-6
PLXNA3	Up		VENTX			CSNK2A1			FGF2		H2AFJ	Down		GADD45A			EHMT2			Group3	Proteases and regulators	MMP1	MMP-1
PDLIM4	Up		XAF1			CTNNAL1			FGF7		PURPL	Down		GADD45B			EHMT2			Group3	Proteases and regulators	MMP3	MMP-3
MT-CYB	Up		ZFP36			CXCL1			GDF15		MCUB	Up		GADD45G			EHMT2			Group3	Proteases and regulators	MMP10	MMp-10
TSPAN13	Up					CXCL8			GEM		FBL	Up		GATA4			EHMT2			Group3	Proteases and regulators	MMP12	MMP-12
SLC16A3	Up					CYR61			GMFG		HIST1H1D	Up		HIPK1			EP400			Group3	Proteases and regulators	MMP13	MMP-13
CCND1	Up					DDB2			HGF		ITPRIPL1	Up		HIPK2			ERF			Group3	Proteases and regulators	MMP14	MMP-14
PLK3	Up					DEK			HMGB1		ANP32B	Up		HIPK3			ETS1			Group3	Proteases and regulators	TIMP1	TIMP-1
GDNF	Up					DGCR8			ICAM1		LBR	Up		HIPK4			ETS2			Group3	Proteases and regulators	TIMP2	TIMP-2
						DHCR24			ICAM3		TMSB15A	Up		HLA-A			EZH2			Group3	Proteases and regulators	SERPINE1	PAI-1
						DHX9			IGF1		CDCA7L	Up		HLA-B			FOS			Group3	Proteases and regulators	SERPINB2	PAI-2
						DLX2			IGFBP1		HIST1H1E	Up		HLA-C			FZR1			Group3	Proteases and regulators	PLAT	tPA
						DPY30			IGFBP2		CBX2	Up		HLA-E			H1-0			Group3	Proteases and regulators	PLAU	uPA
Reference						DUSP16			IGFBP3		HIST2H2AB	Up		HLA-F			H1-1			Group3	Proteases and regulators	CTSB	Cathepsin B
1. Hernandez-Segura A, de Jong TV, Melov S, Guryev V, Campisi J, Demaria M. Unmasking Transcriptional Heterogeneity in Senescent Cells. Curr Biol. 2017;27(17):2652-60 e4. Epub 2017/08/29. doi: 10.1016/j.cub.2017.07.033. PubMed PMID: 28844647; PubMed Central PMCID: PMCPMC5788810.						DUSP3			IGFBP4		PTMA	Up		HLA-G			H1-2			Group3_1	Apoptosis Resistance	BCL2L1	BCL-XL
2. Xu P, Wang M, Song WM, Wang Q, Yuan GC, Sudmant PH, et al. The landscape of human tissue and cell type specific expression and co-regulation of senescence genes. Mol Neurodegener. 2022;17(1):5. Epub 2022/01/11. doi: 10.1186/s13024-021-00507-7. PubMed PMID: 35000600; PubMed Central PMCID: PMCPMC8744330.						E2F1			IGFBP5		CBS	Up		HRAS			H1-3			Group3_1	Apoptosis Resistance	BCL2L2	BCL-W
3. Saul D, Kosinsky RL, Atkinson EJ, Doolittle ML, Zhang X, LeBrasseur NK, et al. A new gene set identifies senescent cells and predicts senescence-associated pathways across tissues. Nat Commun. 2022;13(1):4827. Epub 2022/08/17. doi: 10.1038/s41467-022-32552-1. PubMed PMID: 35974106; PubMed Central PMCID: PMCPMC9381717 Patents on senolytic drugs and their uses and SASP biomarkers are held by May…						EHF			IGFBP6		HIST1H1A	Up		HUS1			H1-4			Group3_1	Apoptosis Resistance	BCL2	BCL2
4. Casella G, Munk R, Kim KM, Piao Y, De S, Abdelmohsen K, et al. Transcriptome signature of cellular senescence. Nucleic Acids Res. 2019;47(14):7294-305. Epub 2019/06/30. doi: 10.1093/nar/gkz555. PubMed PMID: 31251810; PubMed Central PMCID: PMCPMC6698740.						ENDOG			IGFBP7		FAM129A	Up		IGFBP3			H1-5			Group3_1	Apoptosis Resistance	PIK3CA	PI3 K
						EPHA3			IL10		PARP1	Up		IL1A			H2AB1			Group3_1	Apoptosis Resistance	FOXO4	FOXO4
						ERRFI1			IL13		SSRP1	Up		IL6			H2AC14			Group3_1	Apoptosis Resistance	HSP90AB1	HSP90
						ETS1			IL15		AC074135.1	Up		ITPR1			H2AC18			Group3_1	Composition of the Plasma Membrane	CAV1	caveolin-1
						ETS2			IL18					ITPR2			H2AC19			Group4	Soluble or shed receptors or ligands	ICAM1	ICAM-1
						EWSR1			IL1A					ITPR3			H2AC20			Group4	Soluble or shed receptors or ligands	ICAM3	ICAM-3
						EZH2			IL1B					KIR2DL4			H2AC4			Group4	Soluble or shed receptors or ligands	TNFRSF11B	OPG
						FASTK			IL2					KRAS			H2AC6			Group4	Soluble or shed receptors or ligands	TNFRSF1A	sTNFRI
						FBXO31			IL32					LIN37			H2AC7			Group4	Soluble or shed receptors or ligands	TNFRSF10C	TRAIL-R3
						FOS			IL6					LIN52			H2AC8			Group4	Soluble or shed receptors or ligands	FAS	Fas
						FOXM1			IL6ST					LIN54			H2AJ			Group4	Soluble or shed receptors or ligands	TNFRSF1B	sTNFRII
						FOXO3			IL7					LIN9			H2AX			Group4	Soluble or shed receptors or ligands	IL6ST	SGP130
						FXR1			INHA					MAP2K1			H2AZ1			Group4	Soluble or shed receptors or ligands	EGFR	EGF-R
						G6PD			IQGAP2					MAP2K2			H2AZ2			Group5_1	Insoluble factor	FN1	Fibronectin
						GAPDH			ITGA2					MAP2K3			H2BC1			Group5_2	Insoluble factor	COL10A1	Collagens
						GATA4			ITPKA					MAP2K6			H2BC10			Group5_2	Insoluble factor	COL11A1	Collagens
						GKN1			JUN					MAPK1			H2BC11			Group5_2	Insoluble factor	COL11A2	Collagens
						GLB1			KITLG					MAPK11			H2BC12			Group5_2	Insoluble factor	COL12A1	Collagens
						GNG11			LCP1					MAPK12			H2BC13			Group5_2	Insoluble factor	COL13A1	Collagens
						GRK6			MIF					MAPK13			H2BC14			Group5_2	Insoluble factor	COL14A1	Collagens
						HDAC1			MMP1					MAPK14			H2BC15			Group5_2	Insoluble factor	COL15A1	Collagens
						HDAC4			MMP10					MAPK3			H2BC17			Group5_2	Insoluble factor	COL16A1	Collagens
						HEPACAM			MMP12					MAPKAPK2			H2BC21			Group5_2	Insoluble factor	COL17A1	Collagens
						HIVEP1			MMP13					MCU			H2BC3			Group5_2	Insoluble factor	COL18A1	Collagens
						HJURP			MMP14					MDM2			H2BC4			Group5_2	Insoluble factor	COL19A1	Collagens
						HK3			MMP2					MRAS			H2BC5			Group5_2	Insoluble factor	COL1A1	Collagens
						HMGB1			MMP3					MRE11			H2BC6			Group5_2	Insoluble factor	COL1A2	Collagens
						HRAS			MMP9					MTOR			H2BC7			Group5_2	Insoluble factor	COL20A1	Collagens
						HSPA5			NAP1L4					MYBL2			H2BC8			Group5_2	Insoluble factor	COL21A1	Collagens
						HSPB2			NRG1					MYC			H2BC9			Group5_2	Insoluble factor	COL22A1	Collagens
						ID1			PAPPA					NBN			H2BS1			Group5_2	Insoluble factor	COL23A1	Collagens
						ID4			PECAM1					NFATC1			H2BU1			Group5_2	Insoluble factor	COL24A1	Collagens
						IFNG			PGF					NFATC2			H2BU1			Group5_2	Insoluble factor	COL25A1	Collagens
						IGFBP1			PIGF					NFATC3			H3-3A			Group5_2	Insoluble factor	COL26A1	Collagens
						IGFBP3			PLAT					NFATC4			H3-3B			Group5_2	Insoluble factor	COL27A1	Collagens
						IGFBP5			PLAU					NFKB1			H3-4			Group5_2	Insoluble factor	COL28A1	Collagens
						IGFBP6			PLAUR					NRAS			H3-4			Group5_2	Insoluble factor	COL2A1	Collagens
						IL1A			PTBP1					PIK3CA			H3C1			Group5_2	Insoluble factor	COL3A1	Collagens
						ING1			PTGER2					PIK3CB			H3C10			Group5_2	Insoluble factor	COL4A1	Collagens
						ING2			PTGES					PIK3CD			H3C11			Group5_2	Insoluble factor	COL4A2	Collagens
						IRF3			RPS6KA5					PIK3R1			H3C12			Group5_2	Insoluble factor	COL4A3	Collagens
						IRF5			SCAMP4					PIK3R2			H3C13			Group5_2	Insoluble factor	COL4A4	Collagens
						IRF7			SELPLG					PIK3R3			H3C14			Group5_2	Insoluble factor	COL4A5	Collagens
						ITGB4			SEMA3F					PPID			H3C15			Group5_2	Insoluble factor	COL4A6	Collagens
						ITPK1			SERPINB4					PPP1CA			H3C2			Group5_2	Insoluble factor	COL5A1	Collagens
						ITPKB			SERPINE1					PPP1CB			H3C3			Group5_2	Insoluble factor	COL5A2	Collagens
						ITSN2			SERPINE2					PPP1CC			H3C4			Group5_2	Insoluble factor	COL5A3	Collagens
						KCNJ12			SPP1					PPP3CA			H3C6			Group5_2	Insoluble factor	COL6A1	Collagens
						KDM4A			SPX					PPP3CB			H3C7			Group5_2	Insoluble factor	COL6A2	Collagens
						KDM5B			TIMP2					PPP3CC			H3C8			Group5_2	Insoluble factor	COL6A3	Collagens
						KIAA1524			TNF					PPP3R1			H4-16			Group5_2	Insoluble factor	COL6A5	Collagens
						KL			TNFRSF10C					PPP3R2			H4C1			Group5_2	Insoluble factor	COL6A6	Collagens
						KSR2			TNFRSF11B					PTEN			H4C11			Group5_2	Insoluble factor	COL7A1	Collagens
						LATS1			TNFRSF1A					RAD1			H4C12			Group5_2	Insoluble factor	COL8A1	Collagens
						LEO1			TNFRSF1B					RAD50			H4C13			Group5_2	Insoluble factor	COL8A2	Collagens
						LGALS3			TUBGCP2					RAD9A			H4C14			Group5_2	Insoluble factor	COL9A1	Collagens
						LIMA1			VEGFA					RAD9B			H4C15			Group5_2	Insoluble factor	COL9A2	Collagens
						LIMK1			VEGFC					RAF1			H4C2			Group5_2	Insoluble factor	COL9A3	Collagens
						MAD2L1			VGF					RASSF5			H4C3			Group5_3	Insoluble factor	LAMA1	Laminin
						MAGEA2			WNT16					RB1			H4C4			Group5_3	Insoluble factor	LAMA2	Laminin
						MAGOH			WNT2					RBBP4			H4C5			Group5_3	Insoluble factor	LAMA3	Laminin
						MAGOHB								RBL1			H4C6			Group5_3	Insoluble factor	LAMA4	Laminin
						MAP2K1								RBL2			H4C8			Group5_3	Insoluble factor	LAMA5	Laminin
						MAP2K2								RELA			H4C9			Group5_3	Insoluble factor	LAMB1	Laminin
						MAP2K3								RHEB			HIRA			Group5_3	Insoluble factor	LAMB2	Laminin
						MAP2K6								RRAS			HMGA1			Group5_3	Insoluble factor	LAMB3	Laminin
						MAP2K7								RRAS2			HMGA2			Group5_3	Insoluble factor	LAMB4	Laminin
						MAP3K6								SERPINE1			ID1			Group5_3	Insoluble factor	LAMC1	Laminin
						MAP3K7								SIRT1			IFNB1			Group5_3	Insoluble factor	LAMC2	Laminin
						MAP4K1								SLC25A31			IGFBP7			Group5_3	Insoluble factor	LAMC3	Laminin
						MAPK12								SLC25A4			IL1A
						MAPK14								SLC25A5			IL6
						MAPKAPK5								SLC25A6			JUN
						MARCH5								SMAD2			KAT5
						MAST1								SMAD3			KDM6B
						MATK								SQSTM1			LMNB1
						MCL1								TGFB1			MAP2K3
						MCRS1								TGFB2			MAP2K4
						MDH1								TGFB3			MAP2K6
						MECP2								TGFBR1			MAP2K7
						MMP9								TGFBR2			MAP3K5
						MOB3A								TP53			MAP4K4
						MORC3								TRAF3IP2			MAPK1
						MORF4								TRPM7			MAPK10
						MVK								TRPV4			MAPK11
						MXD4								TSC1			MAPK14
						MYC								TSC2			MAPK3
						MYLK								VDAC1			MAPK7
						NADK								VDAC2			MAPK8
						NANOG								VDAC3			MAPK9
						NDRG1								ZFP36L1			MAPKAPK2
						NEK1								ZFP36L2			MAPKAPK3
						NEK4											MAPKAPK5
						NEK6											MDM2
						NFE2L2											MDM4
						NINJ1											MINK1
						NOTCH3											MIR24-1
						NOX4											MIR24-2
						NR2E1											MOV10
						NTN4											MRE11
						NUAK1											NBN
						OTX2											NFKB1
						P3H1											PHC1
						PAK4											PHC2
						PATZ1											PHC3
						PBRM1											POT1
						PCGF2											RAD50
						PDCD10											RB1
						PDIK1L											RBBP4
						PDPK1											RBBP7
						PDZD2											RELA
						PEBP1											RING1
						PEX19											RING1
						PIAS4											RING1
						PIK3C2A											RING1
						PIK3R5											RING1
						PIM1											RING1
						PKM											RNF2
						PLA2R1											RPS27A
						PML											RPS6KA1
						PMVK											RPS6KA1
						PNPT1											RPS6KA2
						POT1											RPS6KA3
						POU5F1											SCMH1
						PPM1B											SP1
						PPM1D											STAT3
						PRKCD											SUZ12
						PRKCH											TERF1
						PRMT6											TERF2
						PROX1											TERF2IP
						PRPF19											TFDP1
						PSMB5											TFDP2
						PSMD14											TINF2
						PTTG1											TINF2
						RAD21											TNIK
						RAF1											TNRC6A
						RB1											TNRC6A
						RBP2											TNRC6B
						RBX1											TNRC6C
						RNASEL											TP53
						RPS6KA6											TXN
						RSL1D1											UBA52
						RUNX1											UBB
						RUVBL2											UBC
						SELENOH											UBE2C
						SENP1											UBE2D1
						SENP2											UBE2E1
						SENP7											UBE2S
						SERPINE1											UBN1
						SFN											VENTX
						SGK1
						SIK1
						SIN3B
						SIRT1
						SIRT6
						SIX1
						SLC13A3
						SLC16A7
						SMARCA4
						SMARCB1
						SMG1
						SMURF2
						SNAI1
						SOCS1
						SOD1
						SORBS2
						SOX2
						SOX5
						SP1
						SPIN1
						SPOP
						SRC
						SREBF1
						SRSF1
						STAT5B
						STK32C
						STK40
						SUPT5H
						SYK
						TACC3
						TBX2
						TERC
						TERF2
						TERT
						TFAP4
						TFDP1
						TGFB1I1
						TLR3
						TMSB4X
						TNFSF13
						TNFSF15
						TOP1
						TP53
						TP63
						TPR
						TRIM28
						TRPM8
						TXN
						TXNIP
						TYK2
						UBTD1
						USP1
						VEGFA
						VENTX
						WNT16
						WNT2
						WRN
						WT1
						WWP1
						XAF1
						YAP1
						YPEL3
						ZFP36
						ZMAT3
						ZNF148
