# Supplementary material for: Neuronal cell cycle reentry events in the aging brain are more prevalent in neurodegeneration and lead to cellular senescence
Source: PLoS Biol. 2024 Apr 23;22(4):e3002559. doi: 10.1371/journal.pbio.3002559 (PMC11037540; doi:10.1371/journal.pbio.3002559)
Supplement: S6 Table — (XLSX) [file pbio.3002559.s030.xlsx]

## Sheet: Sheet1
Table.S6. Differentially expressed genes identified in sub-cluster 5 (i.e., late senescence) against the rest of excitatory neurons.
Symbol	p_val	avg_log2FC	pct.1 (LS)	pct.2 (rest neurons)	Pattern		Symbol	p_val	avg_log2FC	pct.1 (LS)	pct.2 (rest neurons)	Pattern
KCNIP4	0	-3.22989	0.408	0.982	DnInLS		NEFM	0	2.4824	0.409	0.279	UpInLS
CSMD1	0	-2.99913	0.28	0.984	DnInLS		FP236383.3	0	2.44335	0.142	0.06	UpInLS
IQCJ-SCHIP1	0	-2.88051	0.115	0.921	DnInLS		NEFL	0	2.41753	0.536	0.433	UpInLS
NRG3	0	-2.81244	0.247	0.975	DnInLS		HSP90AA1	0	2.39892	0.715	0.634	UpInLS
LRRTM4	0	-2.768	0.243	0.951	DnInLS		MAP1B	0	2.38486	0.883	0.866	UpInLS
RALYL	0	-2.67536	0.216	0.953	DnInLS		ATP1B1	0	2.26394	0.725	0.689	UpInLS
KHDRBS2	0	-2.57781	0.105	0.907	DnInLS		CALM1	0	2.225	0.892	0.823	UpInLS
PDE4D	0	-2.57625	0.234	0.956	DnInLS		TUBA1B	0	2.20364	0.754	0.683	UpInLS
LRP1B	0	-2.56694	0.234	0.924	DnInLS		YWHAH	0	2.15514	0.59	0.536	UpInLS
ADGRB3	0	-2.54209	0.312	0.977	DnInLS		TUBB2A	0	2.13621	0.409	0.327	UpInLS
MALAT1	0	-2.49733	0.598	0.713	DnInLS		CALM3	0	2.13397	0.688	0.641	UpInLS
AGBL4	0	-2.454	0.12	0.914	DnInLS		FTH1	0	2.11663	0.619	0.561	UpInLS
SNTG1	0	-2.4441	0.155	0.904	DnInLS		TMSB4X	0	2.11095	0.59	0.566	UpInLS
FRMD4A	0	-2.44041	0.163	0.941	DnInLS		STMN2	0	2.1015	0.574	0.534	UpInLS
LINGO2	0	-2.42577	0.077	0.832	DnInLS		YWHAG	0	2.05667	0.669	0.659	UpInLS
PTPRD	0	-2.40429	0.391	0.971	DnInLS		GAPDH	0	2.03971	0.666	0.64	UpInLS
DLG2	0	-2.40182	0.33	0.976	DnInLS		SNCG	0	2.03143	0.283	0.164	UpInLS
CCSER1	0	-2.40112	0.129	0.916	DnInLS		MAP1A	0	2.02063	0.47	0.48	UpInLS
NKAIN2	0	-2.39651	0.186	0.918	DnInLS		LINC00657	0	1.9962	0.199	0.082	UpInLS
NAV3	0	-2.37854	0.153	0.858	DnInLS		CLU	0	1.98271	0.668	0.677	UpInLS
KCNQ5	0	-2.37521	0.246	0.94	DnInLS		TMSB10	0	1.98239	0.547	0.543	UpInLS
FAM155A	0	-2.36988	0.298	0.966	DnInLS		RGS4	0	1.93359	0.466	0.449	UpInLS
MAGI2	0	-2.36456	0.246	0.953	DnInLS		PEBP1	0	1.92567	0.622	0.606	UpInLS
FGF14	0	-2.3547	0.27	0.956	DnInLS		NGFRAP1	0	1.91807	0.32	0.248	UpInLS
MDGA2	0	-2.33444	0.113	0.886	DnInLS		NEFH	0	1.90436	0.21	0.104	UpInLS
ROBO2	0	-2.30494	0.201	0.786	DnInLS		VAMP2	0	1.87617	0.123	0.047	UpInLS
SYN3	0	-2.30467	0.041	0.717	DnInLS		NRGN	0	1.8735	0.79	0.817	UpInLS
TENM2	0	-2.30455	0.183	0.902	DnInLS		SEPW1	0	1.85261	0.292	0.234	UpInLS
CNTNAP2	0	-2.27685	0.349	0.966	DnInLS		BEX1	0	1.83983	0.432	0.405	UpInLS
CNTNAP5	0	-2.26495	0.06	0.786	DnInLS		ACTB	0	1.83554	0.711	0.728	UpInLS
DSCAM	0	-2.26257	0.113	0.897	DnInLS		DYNLL1	0	1.83406	0.49	0.495	UpInLS
DPP10	0	-2.25221	0.271	0.927	DnInLS		THY1	0	1.83068	0.619	0.641	UpInLS
CTNNA2	0	-2.22439	0.221	0.913	DnInLS		VSNL1	0	1.82979	0.687	0.749	UpInLS
GRM7	0	-2.22289	0.107	0.826	DnInLS		STMN1	0	1.82235	0.536	0.536	UpInLS
CDH18	0	-2.18038	0.106	0.848	DnInLS		ENC1	0	1.812	0.668	0.689	UpInLS
CDH12	0	-2.17763	0.086	0.75	DnInLS		ALDOA	0	1.79613	0.28	0.221	UpInLS
CNTN5	0	-2.16134	0.096	0.709	DnInLS		CFL1	0	1.78486	0.486	0.495	UpInLS
RBFOX1	0	-2.15491	0.527	0.988	DnInLS		SNAP25	0	1.77299	0.882	0.896	UpInLS
AC092691.1	0	-2.15412	0.038	0.484	DnInLS		CKB	0	1.77107	0.632	0.695	UpInLS
KCNH7	0	-2.15222	0.063	0.706	DnInLS		SPARCL1	0	1.76409	0.67	0.723	UpInLS
OPCML	0	-2.14724	0.353	0.965	DnInLS		PCSK1N	0	1.76311	0.515	0.543	UpInLS
NLGN1	0	-2.14711	0.162	0.893	DnInLS		CCK	0	1.74247	0.468	0.501	UpInLS
AC016831.7	0	-2.14605	0.047	0.598	DnInLS		ACTG1	0	1.73583	0.45	0.456	UpInLS
DMD	0	-2.14099	0.141	0.888	DnInLS		ATP6V1B2	0	1.73412	0.463	0.509	UpInLS
CSMD3	0	-2.13862	0.116	0.878	DnInLS		RAB3A	0	1.7248	0.403	0.401	UpInLS
FAM19A2	0	-2.09132	0.107	0.738	DnInLS		YWHAB	0	1.7248	0.527	0.569	UpInLS
RORA	0	-2.07702	0.133	0.84	DnInLS		NAPB	0	1.72441	0.493	0.542	UpInLS
MACROD2	0	-2.06978	0.112	0.859	DnInLS		NDUFA4	0	1.71816	0.338	0.334	UpInLS
SMYD3	0	-2.05938	0.081	0.837	DnInLS		EIF4A2	0	1.71714	0.567	0.604	UpInLS
CACNA2D3	0	-2.05563	0.119	0.847	DnInLS		PSAP	0	1.71022	0.566	0.625	UpInLS
NRG1	0	-2.04949	0.115	0.675	DnInLS		PGAM1	0	1.71015	0.378	0.369	UpInLS
FAM19A1	0	-2.04718	0.084	0.679	DnInLS		TSPAN7	0	1.69976	0.506	0.536	UpInLS
GRID2	0	-2.04267	0.072	0.692	DnInLS		UCHL1	0	1.695	0.631	0.687	UpInLS
RGS7	0	-2.04193	0.168	0.901	DnInLS		PKM	0	1.6942	0.561	0.626	UpInLS
LRFN5	0	-2.02831	0.124	0.866	DnInLS		HSP90AB1	0	1.69063	0.681	0.72	UpInLS
RGS6	0	-2.02107	0.08	0.751	DnInLS		PPIA	0	1.68645	0.504	0.539	UpInLS
CHSY3	0	-2.00798	0.065	0.793	DnInLS		SERINC1	0	1.68065	0.487	0.538	UpInLS
AUTS2	0	-1.98401	0.11	0.859	DnInLS		NDRG4	0	1.67327	0.56	0.636	UpInLS
ASIC2	0	-1.98334	0.114	0.809	DnInLS		IDS	0	1.67039	0.696	0.772	UpInLS
FTX	0	-1.97864	0.117	0.658	DnInLS		ATP1A1	0	1.66684	0.476	0.564	UpInLS
PHACTR1	0	-1.96498	0.225	0.923	DnInLS		NORAD	0	1.64971	0.294	0.319	UpInLS
FRMPD4	0	-1.95973	0.155	0.888	DnInLS		ARPP19	0	1.64895	0.575	0.664	UpInLS
KCND2	0	-1.95935	0.126	0.804	DnInLS		UQCRH	0	1.64511	0.335	0.355	UpInLS
ADGRL2	0	-1.95883	0.108	0.803	DnInLS		CALM2	0	1.64259	0.131	0.064	UpInLS
KAZN	0	-1.94789	0.123	0.762	DnInLS		SARAF	0	1.64186	0.433	0.479	UpInLS
STXBP5L	0	-1.94626	0.254	0.932	DnInLS		ENO2	0	1.64169	0.59	0.67	UpInLS
GPHN	0	-1.93891	0.1	0.853	DnInLS		CHN1	0	1.64104	0.896	0.906	UpInLS
UNC5D	0	-1.9326	0.117	0.779	DnInLS		KLC1	0	1.63401	0.506	0.576	UpInLS
MSRA	0	-1.93143	0.083	0.828	DnInLS		RTN4	0	1.63214	0.687	0.763	UpInLS
RIMS2	0	-1.92911	0.225	0.921	DnInLS		HINT1	0	1.62603	0.317	0.321	UpInLS
NRXN3	0	-1.92785	0.375	0.949	DnInLS		TPI1	0	1.61943	0.397	0.421	UpInLS
ADGRL3	0	-1.92432	0.243	0.913	DnInLS		LYNX1	0	1.60569	0.229	0.165	UpInLS
CACNA1C	0	-1.92147	0.103	0.845	DnInLS		SKP1	0	1.60423	0.385	0.434	UpInLS
ANKS1B	0	-1.9021	0.357	0.96	DnInLS		ATP6AP2	0	1.5959	0.288	0.295	UpInLS
IL1RAPL1	0	-1.89299	0.174	0.898	DnInLS		CREG2	0	1.59544	0.431	0.495	UpInLS
MTUS2	0	-1.87037	0.085	0.81	DnInLS		C14orf2	0	1.59319	0.21	0.178	UpInLS
TMEM132D	0	-1.86424	0.081	0.74	DnInLS		SOD1	0	1.58474	0.307	0.319	UpInLS
DCC	0	-1.86275	0.078	0.512	DnInLS		GHITM	0	1.58324	0.313	0.323	UpInLS
JMJD1C	0	-1.85796	0.112	0.852	DnInLS		RAB6B	0	1.58124	0.473	0.547	UpInLS
PLEKHA5	0	-1.84752	0.107	0.826	DnInLS		TUBB	0	1.57644	0.359	0.385	UpInLS
MIR99AHG	0	-1.83898	0.077	0.605	DnInLS		TUBA4A	0	1.57465	0.319	0.325	UpInLS
DAB1	0	-1.83531	0.061	0.685	DnInLS		BEX4	0	1.55056	0.326	0.351	UpInLS
CNTN4	0	-1.81853	0.117	0.764	DnInLS		NCDN	0	1.54532	0.464	0.513	UpInLS
LRRC4C	0	-1.81331	0.147	0.802	DnInLS		RTN3	0	1.54333	0.719	0.823	UpInLS
GALNTL6	0	-1.80962	0.049	0.612	DnInLS		DPYSL2	0	1.54056	0.595	0.708	UpInLS
PRKG1	0	-1.80234	0.039	0.569	DnInLS		SRP14	0	1.53233	0.314	0.335	UpInLS
KCNB2	0	-1.78855	0.034	0.657	DnInLS		TUBB4A	0	1.52656	0.343	0.38	UpInLS
ZNF385B	0	-1.7878	0.089	0.775	DnInLS		SYT11	0	1.51979	0.409	0.497	UpInLS
DLGAP2	0	-1.77561	0.124	0.767	DnInLS		UQCR10	0	1.51884	0.272	0.275	UpInLS
ERC2	0	-1.77415	0.156	0.849	DnInLS		SCG5	0	1.50134	0.341	0.419	UpInLS
DGKB	0	-1.77068	0.169	0.778	DnInLS		UBB	0	1.50004	0.316	0.347	UpInLS
GRIK2	0	-1.75293	0.117	0.813	DnInLS		ATP6V0E2	0	1.49854	0.308	0.339	UpInLS
DLGAP1	0	-1.74723	0.373	0.958	DnInLS		TUBA1A	0	1.49652	0.303	0.324	UpInLS
LRRC7	0	-1.74501	0.233	0.911	DnInLS		PCP4	0	1.49628	0.173	0.151	UpInLS
R3HDM1	0	-1.74422	0.193	0.888	DnInLS		PNMA2	0	1.49387	0.423	0.497	UpInLS
ENOX1	0	-1.7432	0.072	0.767	DnInLS		RPL15	0	1.49274	0.344	0.369	UpInLS
XKR6	0	-1.73355	0.049	0.734	DnInLS		CAMK2N1	0	1.48709	0.535	0.659	UpInLS
HS6ST3	0	-1.72651	0.212	0.787	DnInLS		CEND1	0	1.48424	0.433	0.513	UpInLS
PDZRN4	0	-1.72594	0.044	0.504	DnInLS		CLSTN1	0	1.4832	0.573	0.705	UpInLS
MARCH1	0	-1.72495	0.098	0.75	DnInLS		PREPL	0	1.48123	0.602	0.721	UpInLS
TMEM232	0	-1.72108	0.047	0.695	DnInLS		TAGLN3	0	1.48044	0.427	0.524	UpInLS
AHI1	0	-1.71175	0.099	0.816	DnInLS		CCDC85B	0	1.47759	0.343	0.376	UpInLS
NRXN1	0	-1.69113	0.526	0.974	DnInLS		PJA2	0	1.4775	0.491	0.61	UpInLS
EFNA5	0	-1.69101	0.148	0.827	DnInLS		HSPA8	0	1.46205	0.206	0.178	UpInLS
ST6GALNAC5	0	-1.68094	0.113	0.75	DnInLS		MDH1	0	1.46175	0.32	0.421	UpInLS
AC109466.1	0	-1.67525	0.017	0.205	DnInLS		TOMM20	0	1.45942	0.38	0.458	UpInLS
TMEM108	0	-1.67504	0.067	0.694	DnInLS		COX7C	0	1.45665	0.258	0.262	UpInLS
MBD5	0	-1.67296	0.084	0.799	DnInLS		UBC	0	1.45544	0.364	0.424	UpInLS
EPHA6	0	-1.66785	0.077	0.553	DnInLS		ATP1A3	0	1.45402	0.23	0.202	UpInLS
DPYD	0	-1.66018	0.055	0.704	DnInLS		SULT4A1	0	1.45369	0.388	0.472	UpInLS
NEGR1	0	-1.65581	0.396	0.947	DnInLS		CPLX1	0	1.44848	0.305	0.35	UpInLS
UNC79	0	-1.65213	0.078	0.781	DnInLS		FTL	0	1.44297	0.416	0.511	UpInLS
ANKRD30BL	0	-1.64779	0.038	0.649	DnInLS		ITM2B	0	1.43941	0.416	0.55	UpInLS
XIST	0	-1.64381	0.009	0.173	DnInLS		KIF5A	0	1.43135	0.383	0.49	UpInLS
ZNF804B	0	-1.63229	0.035	0.49	DnInLS		LDHA	0	1.43039	0.232	0.227	UpInLS
ZFPM2	0	-1.6302	0.077	0.714	DnInLS		GNG3	0	1.42935	0.287	0.303	UpInLS
SORCS1	0	-1.62904	0.094	0.713	DnInLS		PRNP	0	1.42851	0.651	0.748	UpInLS
HS3ST4	0	-1.62413	0.04	0.482	DnInLS		BEX2	0	1.42831	0.297	0.342	UpInLS
PCDH9	0	-1.61705	0.56	0.977	DnInLS		SPOCK2	0	1.42475	0.324	0.389	UpInLS
SLC35F3	0	-1.61391	0.072	0.672	DnInLS		TUBB4B	0	1.42061	0.296	0.332	UpInLS
ATRNL1	0	-1.61354	0.33	0.908	DnInLS		GPX4	0	1.42058	0.317	0.365	UpInLS
FSTL4	0	-1.61066	0.051	0.649	DnInLS		FAIM2	0	1.41892	0.638	0.735	UpInLS
FLRT2	0	-1.6067	0.152	0.812	DnInLS		ATP6V1F	0	1.41861	0.256	0.277	UpInLS
LSAMP	0	-1.58122	0.477	0.94	DnInLS		MTCH1	0	1.4171	0.385	0.465	UpInLS
GPC6	0	-1.58051	0.033	0.495	DnInLS		NAT8L	0	1.41709	0.353	0.446	UpInLS
INPP4B	0	-1.57959	0.051	0.586	DnInLS		CYCS	0	1.41279	0.226	0.215	UpInLS
CBLN2	0	-1.57746	0.111	0.598	DnInLS		SYT4	0	1.41259	0.354	0.423	UpInLS
POU6F2	0	-1.57272	0.055	0.577	DnInLS		ATP2A2	0	1.41155	0.437	0.581	UpInLS
CADM2	0	-1.57264	0.576	0.976	DnInLS		GNAS	0	1.41057	0.572	0.693	UpInLS
AFF3	0	-1.5656	0.128	0.814	DnInLS		TSPYL1	0	1.40723	0.528	0.627	UpInLS
IMMP2L	0	-1.56459	0.059	0.691	DnInLS		EEF1A2	0	1.4067	0.404	0.479	UpInLS
PTPRK	0	-1.5486	0.189	0.767	DnInLS		SYT2	0	1.40513	0.117	0.063	UpInLS
FGF12	0	-1.54668	0.291	0.919	DnInLS		COX4I1	0	1.40157	0.305	0.358	UpInLS
GRM5	0	-1.54091	0.248	0.904	DnInLS		NAP1L2	0	1.40078	0.302	0.346	UpInLS
RYR2	0	-1.53544	0.299	0.913	DnInLS		BNIP3	0	1.40074	0.297	0.345	UpInLS
IL1RAPL2	0	-1.52797	0.02	0.359	DnInLS		EIF1AX	0	1.39845	0.351	0.432	UpInLS
FMN1	0	-1.52633	0.089	0.699	DnInLS		SNCB	0	1.39442	0.473	0.587	UpInLS
SOX5	0	-1.52559	0.092	0.619	DnInLS		PGM2L1	0	1.39227	0.364	0.479	UpInLS
PDZD2	0	-1.52212	0.109	0.615	DnInLS		ATP6V1E1	0	1.39158	0.316	0.368	UpInLS
CHRM3	0	-1.52191	0.21	0.854	DnInLS		RAC1	0	1.39089	0.347	0.411	UpInLS
KIRREL3	0	-1.51133	0.07	0.66	DnInLS		DHCR24	0	1.38818	0.243	0.231	UpInLS
KALRN	0	-1.50716	0.29	0.917	DnInLS		GOT1	0	1.38565	0.254	0.284	UpInLS
BRINP3	0	-1.50704	0.043	0.59	DnInLS		RNF11	0	1.38371	0.348	0.44	UpInLS
MIR137HG	0	-1.50594	0.031	0.523	DnInLS		OLFM1	0	1.38324	0.515	0.645	UpInLS
PPFIA2	0	-1.50492	0.224	0.873	DnInLS		DYNLL2	0	1.37607	0.334	0.401	UpInLS
AC011287.1	0	-1.50364	0.024	0.339	DnInLS		MLLT11	0	1.37605	0.274	0.319	UpInLS
KHDRBS3	0	-1.49675	0.177	0.832	DnInLS		SLC17A7	0	1.37599	0.562	0.699	UpInLS
EML6	0	-1.47703	0.035	0.632	DnInLS		SERINC3	0	1.37546	0.394	0.513	UpInLS
CTNND2	0	-1.47402	0.289	0.909	DnInLS		SYP	0	1.37269	0.438	0.584	UpInLS
LDB2	0	-1.47336	0.244	0.879	DnInLS		ITM2C	0	1.37188	0.268	0.303	UpInLS
MLIP	0	-1.47321	0.035	0.605	DnInLS		YWHAZ	0	1.37179	0.477	0.629	UpInLS
HECW1	0	-1.47283	0.139	0.804	DnInLS		CHCHD10	0	1.36643	0.286	0.343	UpInLS
FRMD5	0	-1.47275	0.091	0.711	DnInLS		ARF1	0	1.36041	0.354	0.448	UpInLS
CACNB2	0	-1.47127	0.131	0.78	DnInLS		LDHB	0	1.35972	0.249	0.302	UpInLS
SPIDR	0	-1.46556	0.055	0.699	DnInLS		DIRAS2	0	1.3538	0.32	0.414	UpInLS
ANKRD36	0	-1.46332	0.032	0.645	DnInLS		VDAC1	0	1.35344	0.253	0.296	UpInLS
UNC5C	0	-1.45289	0.071	0.662	DnInLS		WSB2	0	1.35305	0.246	0.27	UpInLS
SGCD	0	-1.44801	0.043	0.533	DnInLS		STMN3	0	1.34976	0.367	0.47	UpInLS
CACNA1B	0	-1.44308	0.125	0.803	DnInLS		RPS15	0	1.34775	0.317	0.392	UpInLS
NAV2	0	-1.43846	0.049	0.685	DnInLS		PGRMC1	0	1.34077	0.278	0.34	UpInLS
FMNL2	0	-1.43015	0.115	0.78	DnInLS		APLP2	0	1.34002	0.352	0.489	UpInLS
FMN2	0	-1.42926	0.117	0.796	DnInLS		ARL6IP5	0	1.33873	0.29	0.36	UpInLS
GRIP1	0	-1.42834	0.04	0.536	DnInLS		MORF4L1	0	1.33784	0.394	0.508	UpInLS
ARPP21	0	-1.42774	0.209	0.88	DnInLS		TOLLIP	0	1.33667	0.356	0.457	UpInLS
DGKI	0	-1.42646	0.135	0.799	DnInLS		WBP2	0	1.33603	0.313	0.376	UpInLS
ARL15	0	-1.4209	0.067	0.671	DnInLS		SERF2	0	1.33533	0.271	0.318	UpInLS
LINC01122	0	-1.41853	0.022	0.463	DnInLS		DKK3	0	1.33488	0.437	0.557	UpInLS
LRRTM3	0	-1.41639	0.114	0.764	DnInLS		ENO1	0	1.33356	0.275	0.341	UpInLS
CADPS2	0	-1.41252	0.175	0.759	DnInLS		SCOC	0	1.33339	0.275	0.32	UpInLS
CDH9	0	-1.41079	0.039	0.501	DnInLS		EIF4G2	0	1.33273	0.274	0.317	UpInLS
GABRB1	0	-1.40189	0.136	0.791	DnInLS		COX6B1	0	1.32504	0.239	0.262	UpInLS
ROBO1	0	-1.4002	0.076	0.521	DnInLS		SCN1B	0	1.32452	0.266	0.314	UpInLS
MMP16	0	-1.3989	0.121	0.776	DnInLS		SEZ6L2	0	1.32393	0.336	0.441	UpInLS
LINC01378	0	-1.39846	0.024	0.362	DnInLS		SUB1	0	1.32036	0.291	0.38	UpInLS
UBE2E2	0	-1.39758	0.174	0.831	DnInLS		LGALS1	0	1.31881	0.172	0.117	UpInLS
MAGI1	0	-1.39217	0.123	0.784	DnInLS		CLTC	0	1.31651	0.381	0.53	UpInLS
TJP1	0	-1.39058	0.074	0.725	DnInLS		SV2A	0	1.31466	0.41	0.545	UpInLS
GPATCH8	0	-1.39017	0.068	0.709	DnInLS		ATP6V1A	0	1.3129	0.325	0.444	UpInLS
MNAT1	0	-1.38173	0.045	0.662	DnInLS		SLC12A5	0	1.3123	0.372	0.504	UpInLS
GABRG3	0	-1.3699	0.065	0.64	DnInLS		NUDT3	0	1.30818	0.353	0.468	UpInLS
FHIT	0	-1.36488	0.051	0.614	DnInLS		ATP6AP1	0	1.30783	0.257	0.298	UpInLS
MCTP1	0	-1.36299	0.138	0.737	DnInLS		EIF1	0	1.29979	0.383	0.494	UpInLS
SLC44A5	0	-1.35941	0.033	0.523	DnInLS		PRKAR1A	0	1.29962	0.33	0.44	UpInLS
PNISR	0	-1.35915	0.094	0.747	DnInLS		RNF187	0	1.29678	0.251	0.272	UpInLS
SORBS2	0	-1.35808	0.115	0.733	DnInLS		CDK5R1	0	1.29582	0.345	0.46	UpInLS
GRIA4	0	-1.35065	0.206	0.796	DnInLS		ISCU	0	1.29451	0.214	0.245	UpInLS
N4BP2L2	0	-1.34268	0.097	0.761	DnInLS		COX5B	0	1.29188	0.233	0.256	UpInLS
CDH10	0	-1.33368	0.088	0.698	DnInLS		YWHAE	0	1.2905	0.367	0.504	UpInLS
ZCCHC7	0	-1.33241	0.039	0.631	DnInLS		SLC9A6	0	1.28594	0.318	0.431	UpInLS
FOCAD	0	-1.33102	0.089	0.718	DnInLS		INA	0	1.28249	0.287	0.342	UpInLS
SHISA9	0	-1.32834	0.071	0.676	DnInLS		GDI1	0	1.28174	0.496	0.655	UpInLS
SIPA1L1	0	-1.32531	0.192	0.827	DnInLS		KIF1A	0	1.27542	0.437	0.603	UpInLS
TRIM9	0	-1.32516	0.129	0.795	DnInLS		NDFIP1	0	1.27373	0.439	0.61	UpInLS
PDE10A	0	-1.32477	0.045	0.555	DnInLS		ZBTB18	0	1.27134	0.337	0.459	UpInLS
HYDIN	0	-1.32427	0.02	0.552	DnInLS		RTN1	0	1.26987	0.671	0.825	UpInLS
FER	0	-1.32136	0.053	0.652	DnInLS		TMX4	0	1.26722	0.277	0.362	UpInLS
PTPRG	0	-1.32013	0.109	0.747	DnInLS		GAP43	0	1.26677	0.399	0.567	UpInLS
OLFM3	0	-1.3189	0.145	0.757	DnInLS		LMO4	0	1.25809	0.516	0.683	UpInLS
KIAA1217	0	-1.31664	0.073	0.486	DnInLS		APLP1	0	1.25662	0.366	0.496	UpInLS
TMEM161B-AS1	0	-1.31567	0.059	0.543	DnInLS		C9orf16	0	1.25396	0.282	0.353	UpInLS
MGAT4C	0	-1.31407	0.083	0.573	DnInLS		ATPIF1	0	1.25223	0.17	0.173	UpInLS
TENM4	0	-1.31281	0.059	0.631	DnInLS		AES	0	1.25176	0.315	0.438	UpInLS
ARID1B	0	-1.30812	0.109	0.768	DnInLS		MTPN	0	1.25134	0.304	0.407	UpInLS
TMEM178B	0	-1.30616	0.142	0.75	DnInLS		DYNC1H1	0	1.25066	0.408	0.573	UpInLS
SUPT3H	0	-1.30552	0.039	0.629	DnInLS		COX6C	0	1.25028	0.22	0.276	UpInLS
TSHZ2	0	-1.30527	0.064	0.369	DnInLS		SLC25A3	0	1.24979	0.237	0.302	UpInLS
NCAM2	0	-1.30045	0.266	0.832	DnInLS		PRKAR1B	0	1.24886	0.493	0.663	UpInLS
VTI1A	0	-1.30025	0.038	0.617	DnInLS		CHGA	0	1.24467	0.346	0.466	UpInLS
ANKRD36C	0	-1.29456	0.04	0.622	DnInLS		PEA15	0	1.24335	0.294	0.402	UpInLS
WWOX	0	-1.29439	0.063	0.624	DnInLS		DIRAS1	0	1.24171	0.27	0.336	UpInLS
MCF2L2	0	-1.2922	0.027	0.594	DnInLS		EID1	0	1.24162	0.275	0.346	UpInLS
SETBP1	0	-1.29158	0.064	0.676	DnInLS		PDP1	0	1.24056	0.33	0.463	UpInLS
EXT1	0	-1.29024	0.044	0.6	DnInLS		TMEM30A	0	1.23952	0.298	0.412	UpInLS
PTK2	0	-1.28699	0.151	0.795	DnInLS		ZMAT3	0	1.23899	0.281	0.373	UpInLS
CACNA1A	0	-1.27815	0.129	0.781	DnInLS		TMA7	0	1.23816	0.257	0.331	UpInLS
TNRC6A	0	-1.27204	0.116	0.758	DnInLS		B4GAT1	0	1.23702	0.261	0.316	UpInLS
AC073050.1	0	-1.26962	0.017	0.399	DnInLS		PPP2R1A	0	1.23579	0.41	0.548	UpInLS
RPS6KC1	0	-1.26712	0.078	0.683	DnInLS		SNU13	0	1.23549	0.235	0.284	UpInLS
MYRIP	0	-1.26693	0.079	0.641	DnInLS		UHMK1	0	1.23508	0.241	0.29	UpInLS
MED12L	0	-1.26625	0.078	0.667	DnInLS		KCNAB2	0	1.23376	0.331	0.472	UpInLS
PDZRN3	0	-1.26603	0.053	0.601	DnInLS		MAPK1	0	1.23128	0.451	0.626	UpInLS
CELF2	0	-1.26316	0.48	0.957	DnInLS		GUK1	0	1.22994	0.3	0.408	UpInLS
GRM1	0	-1.26218	0.048	0.56	DnInLS		RPL13	0	1.22828	0.295	0.4	UpInLS
ZFAND3	0	-1.26074	0.071	0.695	DnInLS		STXBP1	0	1.22737	0.563	0.744	UpInLS
DOCK3	0	-1.25512	0.252	0.887	DnInLS		GABARAPL2	0	1.22276	0.2	0.221	UpInLS
CACNA1D	0	-1.25442	0.04	0.607	DnInLS		ZFAND5	0	1.21962	0.305	0.417	UpInLS
RASAL2	0	-1.25403	0.151	0.799	DnInLS		NAP1L3	0	1.21647	0.287	0.376	UpInLS
MLLT10	0	-1.25351	0.042	0.629	DnInLS		BEX3	0	1.21584	0.179	0.199	UpInLS
ADK	0	-1.25164	0.048	0.61	DnInLS		CPLX2	0	1.21529	0.345	0.479	UpInLS
EXOC4	0	-1.25153	0.084	0.707	DnInLS		PCMT1	0	1.21517	0.275	0.401	UpInLS
LINC01250	0	-1.24994	0.017	0.439	DnInLS		NUCKS1	0	1.21492	0.467	0.647	UpInLS
PLCB1	0	-1.24668	0.416	0.933	DnInLS		RABAC1	0	1.21435	0.246	0.3	UpInLS
FAF1	0	-1.24501	0.074	0.688	DnInLS		ATP5B	0	1.21329	0.169	0.165	UpInLS
WDPCP	0	-1.24015	0.059	0.634	DnInLS		CAMK2A	0	1.21322	0.619	0.804	UpInLS
NELL1	0	-1.23916	0.08	0.617	DnInLS		DYNLT3	0	1.21067	0.205	0.211	UpInLS
NBEA	0	-1.23877	0.267	0.879	DnInLS		CPE	0	1.21062	0.437	0.635	UpInLS
GPC5	0	-1.23748	0.029	0.406	DnInLS		EIF1B	0	1.20837	0.239	0.291	UpInLS
ST7	0	-1.23723	0.037	0.601	DnInLS		TMEM130	0	1.20581	0.328	0.45	UpInLS
FARS2	0	-1.23402	0.031	0.589	DnInLS		ARHGDIG	0	1.2057	0.239	0.283	UpInLS
CADPS	0	-1.23073	0.22	0.824	DnInLS		NDUFS5	0	1.20336	0.222	0.264	UpInLS
TBC1D5	0	-1.23031	0.102	0.725	DnInLS		PINK1	0	1.20269	0.216	0.241	UpInLS
LRBA	0	-1.21813	0.043	0.617	DnInLS		CTXN1	0	1.20212	0.262	0.335	UpInLS
ZMAT4	0	-1.21779	0.052	0.592	DnInLS		ANXA6	0	1.20181	0.256	0.34	UpInLS
TMEFF2	0	-1.21251	0.093	0.651	DnInLS		ATP5G3	0	1.19855	0.143	0.128	UpInLS
EPB41L2	0	-1.21216	0.076	0.668	DnInLS		MTURN	0	1.19844	0.353	0.516	UpInLS
CNTN3	0	-1.21122	0.069	0.61	DnInLS		YPEL3	0	1.19649	0.362	0.496	UpInLS
RFX3	0	-1.21096	0.116	0.705	DnInLS		GABRA1	0	1.19612	0.421	0.601	UpInLS
BMPER	0	-1.20913	0.05	0.595	DnInLS		RHEB	0	1.19446	0.244	0.353	UpInLS
PPP2R2B	0	-1.20498	0.252	0.867	DnInLS		CANX	0	1.19376	0.276	0.373	UpInLS
CDKAL1	0	-1.2039	0.031	0.591	DnInLS		SLC22A17	0	1.19094	0.399	0.568	UpInLS
SBF2	0	-1.20363	0.039	0.605	DnInLS		RAB3C	0	1.19071	0.339	0.472	UpInLS
MLLT3	0	-1.20221	0.099	0.699	DnInLS		EPDR1	0	1.19062	0.204	0.215	UpInLS
DANT2	0	-1.20175	0.026	0.481	DnInLS		CTSB	0	1.18974	0.256	0.331	UpInLS
AL117329.1	0	-1.19645	0.014	0.331	DnInLS		MAP1LC3B	0	1.18638	0.222	0.271	UpInLS
LARGE1	0	-1.18854	0.053	0.445	DnInLS		NFE2L1	0	1.18472	0.253	0.327	UpInLS
DIAPH2	0	-1.18506	0.042	0.556	DnInLS		CADM3	0	1.17649	0.32	0.468	UpInLS
HIVEP3	0	-1.18198	0.039	0.57	DnInLS		FAM127A	0	1.17097	0.159	0.157	UpInLS
LRP4	0	-1.18174	0.023	0.465	DnInLS		EEF2	0	1.16953	0.262	0.353	UpInLS
SLC22A10	0	-1.18006	0.013	0.388	DnInLS		NLRP1	0	1.16691	0.257	0.342	UpInLS
NIN	0	-1.17887	0.05	0.618	DnInLS		EEF1A1	0	1.16623	0.243	0.326	UpInLS
KCNH1	0	-1.17311	0.092	0.633	DnInLS		NAP1L5	0	1.16239	0.179	0.173	UpInLS
TOX	0	-1.17031	0.079	0.494	DnInLS		REEP5	0	1.16115	0.283	0.404	UpInLS
RBM6	0	-1.16973	0.048	0.631	DnInLS		GABARAPL1	0	1.15879	0.246	0.332	UpInLS
ERC1	0	-1.16671	0.07	0.647	DnInLS		PTMA	0	1.15782	0.341	0.487	UpInLS
UGGT2	0	-1.16617	0.035	0.581	DnInLS		SNN	0	1.15762	0.204	0.226	UpInLS
DLG1	0	-1.16442	0.107	0.735	DnInLS		NDUFA1	0	1.15741	0.168	0.173	UpInLS
AC090568.2	0	-1.16274	0.012	0.309	DnInLS		SPRYD3	0	1.15247	0.217	0.262	UpInLS
RIMS1	0	-1.15767	0.158	0.772	DnInLS		NUDT4	0	1.14792	0.257	0.362	UpInLS
PLXDC2	0	-1.15538	0.082	0.61	DnInLS		CHCHD2	0	1.14587	0.193	0.228	UpInLS
EXOC6B	0	-1.1548	0.127	0.742	DnInLS		PEG10	0	1.1449	0.184	0.224	UpInLS
SCN3A	0	-1.15391	0.066	0.662	DnInLS		BASP1	0	1.13751	0.601	0.789	UpInLS
HECW2	0	-1.15224	0.107	0.728	DnInLS		PLEKHB2	0	1.13581	0.243	0.332	UpInLS
SCAPER	0	-1.14868	0.053	0.611	DnInLS		FKBP8	0	1.13452	0.344	0.499	UpInLS
TMEM117	0	-1.1485	0.031	0.52	DnInLS		CBX6	0	1.13058	0.277	0.392	UpInLS
LINC00882	0	-1.14704	0.043	0.485	DnInLS		CAPNS1	0	1.1285	0.227	0.279	UpInLS
SSH2	0	-1.14603	0.071	0.652	DnInLS		TMEM160	0	1.12813	0.246	0.323	UpInLS
WDR70	0	-1.14446	0.033	0.57	DnInLS		ATP6V1D	0	1.12809	0.199	0.26	UpInLS
TBCK	0	-1.14412	0.043	0.598	DnInLS		FEM1B	0	1.12794	0.249	0.355	UpInLS
MAST4	0	-1.14171	0.114	0.701	DnInLS		USP22	0	1.1274	0.379	0.564	UpInLS
OTUD7A	0	-1.1406	0.094	0.704	DnInLS		GNB1	0	1.12714	0.36	0.534	UpInLS
KIAA0825	0	-1.14025	0.04	0.573	DnInLS		VPS35	0	1.12696	0.256	0.365	UpInLS
TARBP1	0	-1.1373	0.03	0.562	DnInLS		MAP4	0	1.12095	0.312	0.47	UpInLS
CPNE4	0	-1.13631	0.079	0.549	DnInLS		FBXL16	0	1.11937	0.219	0.293	UpInLS
BTBD9	0	-1.13573	0.13	0.729	DnInLS		FBXO2	0	1.1164	0.19	0.219	UpInLS
CEP112	0	-1.13219	0.016	0.481	DnInLS		SNX3	0	1.11633	0.231	0.333	UpInLS
LAMA2	0	-1.13151	0.025	0.324	DnInLS		TPRG1L	0	1.11548	0.194	0.222	UpInLS
TANC2	0	-1.13041	0.159	0.758	DnInLS		COX7A2	0	1.11486	0.162	0.182	UpInLS
AC019211.1	0	-1.12979	0.013	0.32	DnInLS		NSF	0	1.11153	0.498	0.72	UpInLS
CUX2	0	-1.12624	0.039	0.392	DnInLS		SELENOW	0	1.10954	0.2	0.279	UpInLS
PRKN	0	-1.12558	0.034	0.412	DnInLS		PPP2CB	0	1.10808	0.242	0.349	UpInLS
SDK1	0	-1.12401	0.025	0.349	DnInLS		MT3	0	1.10729	0.259	0.364	UpInLS
MEF2C-AS1	0	-1.12299	0.031	0.439	DnInLS		TPT1	0	1.10624	0.231	0.314	UpInLS
TTC28	0	-1.1222	0.044	0.575	DnInLS		G3BP2	0	1.10618	0.293	0.435	UpInLS
VPS13B	0	-1.12029	0.053	0.624	DnInLS		KCNA2	0	1.10557	0.214	0.272	UpInLS
KCNMA1	0	-1.11976	0.287	0.882	DnInLS		SOD2	0	1.1039	0.187	0.203	UpInLS
NDST3	0	-1.11753	0.068	0.568	DnInLS		CLIP3	0	1.10326	0.321	0.468	UpInLS
PCDH11X	0	-1.11693	0.02	0.361	DnInLS		GPS2	0	1.10219	0.163	0.194	UpInLS
ATP8A2	0	-1.11622	0.173	0.798	DnInLS		PRDX5	0	1.10199	0.179	0.185	UpInLS
CARMIL1	0	-1.11542	0.021	0.387	DnInLS		UQCRHL	0	1.10093	0.135	0.118	UpInLS
AQP4-AS1	0	-1.11389	0.021	0.384	DnInLS		CYFIP2	0	1.10003	0.381	0.575	UpInLS
MYO1D	0	-1.11335	0.025	0.497	DnInLS		AKAP11	0	1.09987	0.352	0.546	UpInLS
SGCZ	0	-1.11054	0.047	0.354	DnInLS		CCNI	0	1.09679	0.319	0.466	UpInLS
HTR1E	0	-1.11013	0.026	0.495	DnInLS		VGF	0	1.0966	0.162	0.183	UpInLS
CSMD2	0	-1.10981	0.028	0.514	DnInLS		INPP5F	0	1.09518	0.32	0.479	UpInLS
SCAI	0	-1.10559	0.048	0.591	DnInLS		SYN1	0	1.0944	0.426	0.603	UpInLS
PARP8	0	-1.10549	0.054	0.594	DnInLS		PIN1	0	1.09302	0.255	0.368	UpInLS
HDAC9	0	-1.10485	0.117	0.662	DnInLS		FAM217B	0	1.09278	0.24	0.357	UpInLS
FOXP2	0	-1.10079	0.042	0.398	DnInLS		TSPYL4	0	1.09253	0.273	0.385	UpInLS
MAP7	0	-1.09936	0.099	0.701	DnInLS		UBE2V2	0	1.08983	0.22	0.304	UpInLS
NR3C2	0	-1.09658	0.074	0.62	DnInLS		NRN1	0	1.08855	0.192	0.246	UpInLS
RAPGEF4	0	-1.09506	0.117	0.719	DnInLS		BEX5	0	1.08649	0.171	0.2	UpInLS
STAG1	0	-1.09391	0.043	0.583	DnInLS		STX1B	0	1.08395	0.266	0.379	UpInLS
CTDSPL	0	-1.09287	0.033	0.542	DnInLS		SLC25A6	0	1.08258	0.203	0.255	UpInLS
TTN-AS1	0	-1.08859	0.021	0.384	DnInLS		SEC62	0	1.08189	0.297	0.462	UpInLS
MAPK10	0	-1.08765	0.332	0.893	DnInLS		GRINA	0	1.07873	0.206	0.285	UpInLS
LIMCH1	0	-1.08636	0.19	0.792	DnInLS		ATP6V0D1	0	1.07434	0.224	0.294	UpInLS
PDE1A	0	-1.08603	0.232	0.779	DnInLS		RPL41	0	1.07326	0.176	0.216	UpInLS
GALNT13	0	-1.08603	0.045	0.469	DnInLS		CMAS	0	1.07315	0.197	0.269	UpInLS
AC008415.1	0	-1.08368	0.006	0.158	DnInLS		SNX10	0	1.07311	0.275	0.426	UpInLS
HDAC8	0	-1.07648	0.034	0.544	DnInLS		BRK1	0	1.07289	0.203	0.273	UpInLS
PTPRR	0	-1.07533	0.036	0.532	DnInLS		AP2S1	0	1.07201	0.213	0.273	UpInLS
STXBP5-AS1	0	-1.07441	0.032	0.412	DnInLS		TCEAL2	0	1.07143	0.212	0.293	UpInLS
UBR5	0	-1.07317	0.058	0.616	DnInLS		SLC25A4	0	1.06796	0.179	0.226	UpInLS
PTPRT	0	-1.07286	0.188	0.704	DnInLS		MARCKS	0	1.066	0.232	0.344	UpInLS
THRB	0	-1.07216	0.265	0.856	DnInLS		TMOD2	0	1.06518	0.328	0.519	UpInLS
TFDP2	0	-1.07207	0.05	0.562	DnInLS		DNAJC5	0	1.06511	0.255	0.384	UpInLS
PTPRO	0	-1.07176	0.06	0.538	DnInLS		SH3BGRL3	0	1.0632	0.176	0.197	UpInLS
JAKMIP2	0	-1.06916	0.088	0.671	DnInLS		RAN	0	1.06201	0.183	0.227	UpInLS
KIF13A	0	-1.06886	0.038	0.497	DnInLS		HAPLN4	0	1.06194	0.175	0.19	UpInLS
KCTD8	0	-1.06804	0.062	0.527	DnInLS		MRFAP1	0	1.06173	0.19	0.232	UpInLS
TTTY14	0	-1.06703	0.032	0.384	DnInLS		DYNLRB1	0	1.06081	0.262	0.377	UpInLS
ZNF804A	0	-1.06236	0.043	0.42	DnInLS		TPPP	0	1.05804	0.315	0.481	UpInLS
FBXL17	0	-1.0615	0.188	0.805	DnInLS		PGK1	0	1.05671	0.214	0.304	UpInLS
DENND4A	0	-1.06041	0.077	0.657	DnInLS		AP1S1	0	1.05033	0.203	0.254	UpInLS
ANK3	0	-1.05677	0.294	0.883	DnInLS		TCEB2	0	1.04995	0.131	0.123	UpInLS
SRRM3	0	-1.05635	0.068	0.641	DnInLS		PCDH9-AS1	0	1.04963	0.118	0.09	UpInLS
AKT3	0	-1.05505	0.242	0.844	DnInLS		NPTXR	0	1.04837	0.319	0.481	UpInLS
MIPOL1	0	-1.04747	0.023	0.479	DnInLS		DNAJA1	0	1.04822	0.19	0.246	UpInLS
SAMD12	0	-1.04706	0.189	0.809	DnInLS		DSTN	0	1.0482	0.254	0.41	UpInLS
DIRC3	0	-1.04471	0.009	0.403	DnInLS		MAP1LC3A	0	1.04817	0.245	0.355	UpInLS
NKTR	0	-1.04394	0.042	0.575	DnInLS		VAMP1	0	1.04811	0.148	0.148	UpInLS
UNC13C	0	-1.04367	0.029	0.441	DnInLS		VSTM2L	0	1.04805	0.211	0.278	UpInLS
CDH8	0	-1.04304	0.105	0.643	DnInLS		KIF3C	0	1.04591	0.31	0.461	UpInLS
MPDZ	0	-1.04292	0.061	0.602	DnInLS		PITHD1	0	1.04489	0.195	0.265	UpInLS
VWA8	0	-1.04085	0.038	0.547	DnInLS		CDIP1	0	1.04401	0.292	0.434	UpInLS
AC006148.1	0	-1.03874	0.017	0.353	DnInLS		SDCBP	0	1.04285	0.188	0.223	UpInLS
GAB1	0	-1.03561	0.047	0.527	DnInLS		NPTN	0	1.04016	0.431	0.656	UpInLS
SLIT2	0	-1.03246	0.077	0.543	DnInLS		RPLP1	0	1.03962	0.204	0.28	UpInLS
FAM172A	0	-1.03167	0.086	0.666	DnInLS		HSPH1	0	1.03891	0.341	0.515	UpInLS
PDE4DIP	0	-1.03111	0.201	0.806	DnInLS		YWHAQ	0	1.03857	0.231	0.357	UpInLS
RNPC3	0	-1.02925	0.015	0.458	DnInLS		RHBDD2	0	1.03763	0.321	0.476	UpInLS
GMDS	0	-1.02868	0.03	0.496	DnInLS		ATP6V1G1	0	1.03734	0.194	0.268	UpInLS
PRKD1	0	-1.02845	0.022	0.413	DnInLS		ARL8B	0	1.03512	0.257	0.398	UpInLS
AC067956.1	0	-1.02747	0.016	0.357	DnInLS		TMEM59L	0	1.03437	0.459	0.674	UpInLS
MICAL3	0	-1.027	0.075	0.643	DnInLS		HMP19	0	1.03427	0.158	0.185	UpInLS
R3HDM2	0	-1.02467	0.054	0.593	DnInLS		TMEM14A	0	1.03337	0.194	0.281	UpInLS
XKR4	0	-1.02328	0.076	0.613	DnInLS		PLD3	0	1.03326	0.412	0.635	UpInLS
PACRG	0	-1.02269	0.027	0.469	DnInLS		RPS14	0	1.03126	0.196	0.27	UpInLS
ATP9B	0	-1.02217	0.034	0.529	DnInLS		C1orf115	0	1.03036	0.232	0.349	UpInLS
MED13L	0	-1.02142	0.116	0.724	DnInLS		SYT13	0	1.02948	0.222	0.346	UpInLS
MAGI3	0	-1.01916	0.067	0.596	DnInLS		AASDHPPT	0	1.02908	0.213	0.31	UpInLS
ATXN1	0	-1.01814	0.173	0.783	DnInLS		UQCRB	0	1.02834	0.203	0.288	UpInLS
COP1	0	-1.01784	0.023	0.391	DnInLS		CD99L2	0	1.02783	0.224	0.353	UpInLS
KSR2	0	-1.01664	0.121	0.701	DnInLS		PTPRN	0	1.02579	0.315	0.498	UpInLS
SCMH1	0	-1.01483	0.029	0.503	DnInLS		DNAJB6	0	1.02094	0.245	0.389	UpInLS
DENND1A	0	-1.01432	0.066	0.61	DnInLS		UBE2N	0	1.01958	0.201	0.289	UpInLS
DNAJC1	0	-1.00871	0.022	0.475	DnInLS		NUAK1	0	1.01954	0.38	0.6	UpInLS
ASCC3	0	-1.00778	0.029	0.512	DnInLS		DMTN	0	1.01942	0.3	0.466	UpInLS
DNAH6	0	-1.0054	0.015	0.427	DnInLS		SYNGR1	0	1.01861	0.29	0.453	UpInLS
OSBPL6	0	-1.00539	0.088	0.662	DnInLS		PRDX1	0	1.01857	0.175	0.235	UpInLS
ITPR2	0	-1.00538	0.032	0.386	DnInLS		DNM1	0	1.01792	0.594	0.811	UpInLS
GRID1	0	-1.00514	0.066	0.595	DnInLS		USP11	0	1.01673	0.314	0.495	UpInLS
CCDC30	0	-1.00446	0.015	0.442	DnInLS		SAP18	0	1.01644	0.171	0.217	UpInLS
NALCN	0	-1.00211	0.102	0.682	DnInLS		TERF2IP	0	1.01603	0.331	0.52	UpInLS
TRPM3	0	-1.00071	0.066	0.466	DnInLS		ATP5J	0	1.01552	0.127	0.129	UpInLS
							TRMT112	0	1.01492	0.161	0.202	UpInLS
							SUMO3	0	1.01394	0.219	0.3	UpInLS
							RPL28	0	1.0137	0.246	0.374	UpInLS
							ATXN7L3B	0	1.01289	0.193	0.267	UpInLS
							ARF5	0	1.01195	0.154	0.18	UpInLS
							SNCA	0	1.01177	0.426	0.67	UpInLS
							UQCRQ	0	1.01012	0.141	0.154	UpInLS
							PTMS	0	1.0093	0.27	0.413	UpInLS
							IFI6	0	1.00718	0.128	0.123	UpInLS
							ATP6V0B	0	1.00628	0.276	0.429	UpInLS
							PAFAH1B2	0	1.00608	0.23	0.346	UpInLS
							OTUB1	0	1.00527	0.21	0.288	UpInLS
							MYL12B	0	1.00446	0.159	0.184	UpInLS
							HPCAL4	0	1.00383	0.225	0.348	UpInLS
							UBA52	0	1.00382	0.212	0.307	UpInLS
							PPP3CB	0	1.00237	0.32	0.528	UpInLS
							EIF5A	0	1.00098	0.195	0.283	UpInLS
