# Supplementary material for: Neuronal cell cycle reentry events in the aging brain are more prevalent in neurodegeneration and lead to cellular senescence
Source: PLoS Biol. 2024 Apr 23;22(4):e3002559. doi: 10.1371/journal.pbio.3002559 (PMC11037540; doi:10.1371/journal.pbio.3002559)
Supplement: S7 Table — (XLSX) [file pbio.3002559.s031.xlsx]

## Sheet: Integrated Analysis
Table.S7. Details of the transcription factor lists and identified from the SCENIC algorithm with pathway enrichment analysis.
Integrated-All datasets	SCENIC calculated transcripton regulon activities in different sub-cluaters/layers
Transcription factors	L4/6	L4/5	L2/3	L5/6	ES	LS	L6	L5	Pattern of changes in ES/LS	PvalueForUpMarkers	PvalueForDownMarkers				Pathway enrichment among activated transcription factors
ARNT	0.00626756	0.0134157	0.00552889	0.0112639	0.0123939	0.0121637	0.00798623	0.0201534	Inhibited	1	1				Index	Name	P-value
HIVEP1	0.00624219	0.00946507	0.00360002	0.00729596	0.0072157	0.00632668	0.00494915	0.0151127	Inhibited	1	1				1	TNF-alpha Signaling via NF-kB	1.352e-10
BACH2	0.0103244	0.0153208	0.00864358	0.0151711	0.0150755	0.00832469	0.0134605	0.118663	Inhibited	1	1				2	Hypoxia	0.0001586
ETV5	0.0204297	0.0246784	0.0278678	0.0363097	0.022703	0.0216155	0.0153654	0.0513242	Inhibited	0.693474	0.307261				3	Unfolded Protein Response	0.004128
FOXO3	0.018301	0.0266308	0.020421	0.0220063	0.0191451	0.0232282	0.0168041	0.0201807	Inhibited	1	1				4	UV Response Dn	0.00962
RARB	0.0289441	0.0907065	0.0214471	0.0274224	0.0240699	0.0224582	0.0107555	0.0667105	Inhibited	1	0.297377				5	Notch Signaling	0.01453
ZFHX3	0.0226173	0.0138146	0.0196475	0.105288	0.023504	0.015587	0.0195334	0.050887	Inhibited	1	0.234585				6	Wnt-beta Catenin Signaling	0.0243
BCL11A	0.0653223	0.0738282	0.0532379	0.0966393	0.0436499	0.0347553	0.0625401	0.10809	Inhibited	0.933801	0.0433268				7	G2-M Checkpoint	0.02843
FOXN3	0.0742578	0.0855146	0.0608458	0.101445	0.0477362	0.0288174	0.0592454	0.107962	Inhibited	0.998881	3.03351e-11				8	DNA Repair	0.05564
ELF2	0.0340465	0.0350062	0.0331291	0.0394243	0.0326262	0.0249229	0.0327435	0.035935	Inhibited	0.958087	0.690688				9	IL-6/JAK/STAT3 Signaling	0.08951
TEAD1	0.0535312	0.0572276	0.0376348	0.0765739	0.0320501	0.018422	0.0551679	0.0566578	Inhibited	1	0.220822				10	IL-2/STAT5 Signaling	0.1072
USP39	0.0927076	0.08775	0.0824899	0.120696	0.059117	0.0327496	0.10444	0.0805583	Inhibited	1	0.00286454
IKZF2	0.0893249	0.0538466	0.0598527	0.0885534	0.0431019	0.0208404	0.0787176	0.0494662	Inhibited	1	0.000343167
NFATC3	0.0332872	0.030719	0.0321689	0.0382474	0.0320277	0.0207274	0.0389644	0.0280721	Inhibited	1	0.349984
MKX	0.0671727	0.0677766	0.0456912	0.0658334	0.0391499	0.0306848	0.0759489	0.050197	Inhibited	1	0.0541212
TBL1XR1	0.0332575	0.0301469	0.0296073	0.0316821	0.0289091	0.0282571	0.0341824	0.0283831	Inhibited	1	1				Pathway enrichment among inhibited transcription factors
MEF2C	0.28057	0.2807	0.280454	0.249636	0.158067	0.135833	0.252995	0.237922	Inhibited	1	0.00425774				Index	Name	P-value
PBX1	0.182004	0.18842	0.211523	0.195248	0.128951	0.0620716	0.167681	0.199853	Inhibited	1	0				1	UV Response Dn	0.04507
TCF4	0.122154	0.121496	0.122514	0.112013	0.0834813	0.0512968	0.116769	0.112427	Inhibited	0.979851	0				2	Hypoxia	0.08027
FOXP2	0.0854287	0.0871975	0.0833504	0.087559	0.0612231	0.0390853	0.0846014	0.0891934	Inhibited	0.958457	0				3	G2-M Checkpoint	0.08027
ZEB1	0.0886037	0.0894392	0.0850158	0.0862258	0.0619846	0.0377569	0.0843645	0.0844179	Inhibited	1	0				4	heme Metabolism	0.08027
KDM5A	0.0353112	0.0327026	0.0361105	0.0357693	0.0331006	0.0230282	0.0354911	0.0334861	Inhibited	0.999998	0.00434357				5	Myogenesis	0.08027
ZNF91	0.259399	0.25587	0.269979	0.246681	0.206032	0.125781	0.23812	0.214992	Inhibited	0.00214178	6.34036e-10				6	Cholesterol Homeostasis	0.1601
BDP1	0.0691042	0.0628547	0.0711291	0.0665402	0.0544226	0.0314359	0.0683437	0.0592097	Inhibited	0.999148	4.28657e-12				7	Unfolded Protein Response	0.234
BPTF	0.0550045	0.0530318	0.0542974	0.0533343	0.0473162	0.0349527	0.0527201	0.0519628	Inhibited	0.737405	0.237988				8	UV Response Up	0.3115
CUX1	0.0795191	0.0739116	0.0822759	0.0727481	0.0596692	0.0363573	0.0848488	0.0707983	Inhibited	0.936188	0				9	IL-2/STAT5 Signaling	0.3753
NR3C1	0.0493883	0.0463791	0.0495743	0.047882	0.0410501	0.0337004	0.0510763	0.0443547	Inhibited	1	2.40977e-09				10	p53 Pathway	0.3768
FOXP1	0.15508	0.158819	0.148454	0.131922	0.101669	0.0605048	0.162163	0.137226	Inhibited	1	8.5715e-11
NRF1	0.0407405	0.0388402	0.0376221	0.0378844	0.0337186	0.0215304	0.0425842	0.0400607	Inhibited	1	2.34847e-08
JUND	0.0561263	0.055048	0.0559525	0.0542064	0.0474969	0.0525297	0.0548781	0.0514468	Inhibited	0	6.99441e-15
LHX2	0.0807174	0.0811131	0.0818112	0.0437448	0.0483221	0.0268215	0.0234204	0.0680823	Inhibited	0.577621	0.00851706
ZNF345	0.00877653	0.00685911	0.0299213	0.00558645	0.0201553	0.0156428	0.00354088	0.0316763	Inhibited	1	1
RFX2	0.0140516	0.0165527	0.0233096	0.0211586	0.0220455	0.0100825	0.0136945	0.0206097	Inhibited	1	0.448143
ZBTB7C	0.00316508	0.00514135	0.0193609	0.00562633	0.0107164	0.00261928	0.00283899	0.00233455	Inhibited	1	1
E2F3	0.0352624	0.011188	0.0401223	0.0290549	0.0405773	0.0296117	0.0302967	0.0220893	Inhibited	1	0.360525
ATF2	0.0445902	0.042507	0.0488939	0.0440932	0.0412605	0.0416652	0.0476987	0.0398116	Inhibited	0.970259	0.987655
POU2F2	0.0431376	0.0279267	0.0480313	0.0325101	0.0378796	0.0177902	0.0421109	0.0263039	Inhibited	0.998293	3.36848e-05
PPARG	0.0242746	0.021803	0.0334067	0.0276327	0.0242663	0.0121951	0.0310917	0.0195636	Inhibited	0.993431	0.00288245
CREB5	0.0398395	0.016961	0.010595	0.0165882	0.0198244	0.0141262	0.0354482	0.013787	Inhibited	1	1
FOXN2	0.0371886	0.0152749	0.0157353	0.0243206	0.0222153	0.0195908	0.0177185	0.0180964	Inhibited	1	1
TCF12	0.0394372	0.0129699	0.0179621	0.0202869	0.0277698	0.017101	0.0206965	0.0182056	Inhibited	1	1
HES4	0.0165652	0.0264666	0.0189261	0.0203686	0.024097	0.0155844	0.0355333	0.0357806	Inhibited	1	1
CHD2	0.0313794	0.0295508	0.0310646	0.0291665	0.0329808	0.0273547	0.0348777	0.0296404	Inhibited	0.99608	0.919285
ATF6	0.0304964	0.0371585	0.0335944	0.0247536	0.0318491	0.0207427	0.0613989	0.0384446	Inhibited	1	1
PBX3	0.0522747	0.0344117	0.0428773	0.0377881	0.0385705	0.0231138	0.0960549	0.0359789	Inhibited	0.99816	2.13321e-06
MEF2A	0.0596003	0.0602803	0.0668942	0.0433565	0.0501775	0.0383951	0.0802013	0.0454643	Inhibited	1	0.738919
SOX5	0.417511	0.289626	0.303357	0.187907	0.141325	0.0369331	0.515132	0.312243	Inhibited	1	1.05635e-09
UBE2K	0.045908	0.0450649	0.0435271	0.0420757	0.0364896	0.0581856	0.0500845	0.0384456	Activated	1	1
ELK1	0.0461561	0.045542	0.0459583	0.0457524	0.0444448	0.0548292	0.0454951	0.0429348	Activated	0	0.443664
EGR1	0.0427121	0.044747	0.0437835	0.0425223	0.0362015	0.0696436	0.0407355	0.0370858	Activated	0	0.060063
KLF9	0.0471197	0.0502078	0.0516289	0.0453855	0.0368502	0.0825466	0.0406643	0.0360869	Activated	0	1
HLF	0.0454328	0.0472273	0.0456922	0.0444096	0.0379676	0.0611876	0.0429402	0.0458172	Activated	0	0.164958
PKM	0.363245	0.35248	0.376332	0.340418	0.190542	0.576842	0.299102	0.291307	Activated	4.74421e-12	1
ZNF337	0.00756455	0.00859766	0.00811348	0.00740998	0.00829124	0.0113134	0.00825706	0.00490457	Activated	0.418134	1
FOXG1	0.00447672	0.00634905	0.00804196	0.00430184	0.00733502	0.0215074	0.00433433	0.005758	Activated	0.198635	1
PPARGC1A	0.000867671	0.000689821	0.00354824	0.000890644	0.00367126	0.0108435	0.000626382	0.000181046	Activated	1	1
EGR3	0.0258215	0.0264091	0.0289955	0.0262993	0.0301101	0.0533972	0.0273066	0.023349	Activated	0	0.9999
JUN	0.0277973	0.0270587	0.0288582	0.0276655	0.0287564	0.0526229	0.026877	0.0238805	Activated	0	0.999961
THRA	0.0465421	0.045403	0.0499593	0.0460058	0.0498891	0.0937121	0.044532	0.0382411	Activated	0	1
ZBTB7A	0.0382995	0.0378725	0.0375793	0.0371243	0.0385706	0.0492417	0.0361699	0.0344109	Activated	1.55431e-15	0.961905
CEBPB	0.0279061	0.0274435	0.0284887	0.0277677	0.0327091	0.0515303	0.0256862	0.0237431	Activated	1.65956e-12	0.999997
TEF	0.0425702	0.0427307	0.0432685	0.0415688	0.0485121	0.0752999	0.0395357	0.0364922	Activated	2.9643e-13	0.999853
ANXA11	0.0208168	0.0171976	0.0224997	0.0227933	0.0261428	0.0351283	0.0215472	0.0152222	Activated	0.322527	1
USF2	0.0448283	0.0411635	0.045735	0.0405295	0.0542749	0.0756888	0.0460421	0.0377208	Activated	0.00377308	1
KLF16	0.0244772	0.0244644	0.0251391	0.0241114	0.0317289	0.0443658	0.0244986	0.0216579	Activated	6.87872e-07	1
UBTF	0.0241311	0.0242149	0.0237157	0.0238758	0.0333955	0.0434042	0.0235102	0.0212567	Activated	0.000750703	1
NR1D1	0.0305753	0.0498252	0.0300374	0.0325901	0.0389206	0.0711027	0.0263916	0.0345529	Activated	0.0989218	1
ETS2	0.0327669	0.0339679	0.0328925	0.0321904	0.0326549	0.06615	0.031739	0.0314725	Activated	0	0.999963
ATF4	0.0261141	0.0275969	0.0257037	0.0262792	0.0273583	0.0582145	0.0253015	0.025994	Activated	0	0.999387
YY1	0.0268735	0.028535	0.0269768	0.0275509	0.0290605	0.0570116	0.0262389	0.0260263	Activated	0	1
BHLHE40	0.023036	0.0248351	0.023599	0.0235034	0.0270872	0.057784	0.0221287	0.0235328	Activated	0	1
TAF7	0.0147153	0.0169932	0.0146831	0.0153188	0.0195067	0.0477501	0.015974	0.0148325	Activated	0	1
CEBPD	0.0358627	0.0370291	0.0369894	0.0357053	0.0353406	0.0468224	0.0351537	0.0349753	Activated	0.000147721	0.269432
NFIC	0.0307794	0.0361765	0.0317469	0.0330573	0.0323232	0.0564582	0.0300971	0.0324825	Activated	0.000112404	1
RAD21	0.0328643	0.0362647	0.0326798	0.0335249	0.0307045	0.0651387	0.0304524	0.0327172	Activated	0	1
SREBF2	0.0249747	0.0262944	0.0228534	0.0248368	0.0275774	0.038656	0.0273038	0.0262637	Activated	9.72174e-05	1
ZNF281	0.0144741	0.0163439	0.0138204	0.0176264	0.0228607	0.0325388	0.0191788	0.019955	Activated	0.282062	0.968237
BCLAF1	0.0248513	0.0266246	0.0259049	0.0251327	0.027953	0.0342355	0.0245999	0.026224	Activated	0.903396	1
TRIM28	0.0249531	0.0267685	0.0241467	0.0221597	0.0323769	0.0503963	0.0229441	0.0244398	Activated	0.00235073	1
MAZ	0.0281214	0.0293733	0.0273398	0.0278078	0.0347303	0.0544022	0.0264938	0.0287267	Activated	0	1
STAT1	0.0135397	0.0162691	0.0140563	0.0140644	0.0206623	0.0415442	0.0128631	0.0162639	Activated	9.97979e-13	0.999365
CEBPG	0.00887526	0.0104748	0.00933133	0.0102329	0.0150975	0.0260025	0.00879305	0.0111425	Activated	0.246723	1
GTF2F1	0.0130323	0.0155406	0.013268	0.0153718	0.0225143	0.0382	0.01315	0.0163962	Activated	0.000310281	1
CREBL2	0.0130313	0.0148717	0.0131521	0.0141886	0.0226272	0.0386991	0.0133191	0.0142771	Activated	1.16734e-06	0.999992
POLR2A	0.0248741	0.025801	0.0237479	0.0247474	0.033313	0.0508377	0.0244555	0.0237307	Activated	7.99361e-15	1
BHLHE41	0.0193212	0.0202969	0.0216463	0.0240657	0.0239712	0.0345122	0.0180325	0.0215	Activated	0.045243	0.378834
FOSL2	0.0186603	0.0203994	0.0185103	0.0197462	0.0229987	0.0380471	0.0166639	0.0224504	Activated	5.70838e-08	0.995808
ZNF25	0.013056	0.0178762	0.0125899	0.0153077	0.0197725	0.0356303	0.0100475	0.0187751	Activated	0.017224	1
ATF1	0.0145443	0.0160098	0.0149476	0.0168256	0.0238598	0.0215969	0.0159418	0.0175126	Activated	1	0.976957
NR2C1	0.00657724	0.00819457	0.0068716	0.0101552	0.0203351	0.0161348	0.009365	0.0112629	Activated	1	1
PHF8	0.00916219	0.0103313	0.0100661	0.0115366	0.0184242	0.0186018	0.0107295	0.0132286	Activated	0.993074	0.999556
SP4	0.00803011	0.00924203	0.00922016	0.00952015	0.0155366	0.0148664	0.00918283	0.011183	Activated	0.999634	0.999447
MAX	0.0092236	0.0104716	0.00952353	0.0118431	0.0168266	0.0170699	0.0112053	0.0124012	Activated	0.999999	1
SETDB1	0.0115227	0.0126057	0.0119775	0.0136695	0.0195482	0.0185687	0.0127838	0.0137275	Activated	0.999721	0.999998
HBP1	0.00249719	0.00392683	0.00308079	0.0042388	0.00928016	0.0105997	0.0014791	0.00539617	Activated	1	1
SMARCC2	0.0141909	0.0164501	0.0156646	0.0173404	0.0218329	0.0228516	0.0153203	0.0177997	Activated	0.999973	0.999994
GABPA	0.00820594	0.00892316	0.00814535	0.0108161	0.0169509	0.0173464	0.00904085	0.0140615	Activated	0.998805	0.999997
SIN3A	0.00857141	0.0104992	0.00872123	0.0104968	0.0169497	0.0175172	0.0100976	0.0125952	Activated	0.98545	1
TCF7L2	0.0039878	0.00842295	0.00308981	0.00720082	0.0185739	0.0196097	0.00558712	0.0113003	Activated	1	1
GTF2IRD1	0.00364221	0.00441004	0.00422835	0.00544778	0.0308208	0.0251856	0.00342912	0.00710325	Activated	1	1
ZFHX2	0.00180386	0.00232444	0.00136168	0.00282825	0.0133851	0.0116394	0.00246906	0.00317961	Activated	1	1
NFKB1	0.00263431	0.00354578	0.00225348	0.00370438	0.0127372	0.0121346	0.00299106	0.00528585	Activated	1	1
ZNF76	0.00708365	0.00831772	0.00727203	0.00956093	0.0248169	0.024525	0.00717187	0.0111353	Activated	0.917275	1
ZNF236	0.00496291	0.00576033	0.00194745	0.00808924	0.0718619	0.0752958	0.00575915	0.0121439	Activated	1	1
ZNF667	0.000798372	0.000801118	0.00023708	0.00135409	0.0121981	0.0126172	0.000682776	0.00183191	Activated	1	1
IRF2	0.00380757	0.00452656	0.00365716	0.00445572	0.0118735	0.0124424	0.00382301	0.00500601	Activated	0.978123	0.995898
PPARD	0.00508961	0.00571021	0.00502968	0.00560647	0.0177938	0.0185933	0.00507026	0.00726325	Activated	0.857444	1
CTCF	0.00834629	0.00888879	0.00968977	0.0105744	0.0152376	0.0140151	0.00884024	0.00964959	Activated	0.984001	0.995233
ZNF814	0.0149032	0.0147977	0.0168635	0.0162425	0.0235712	0.0209166	0.0142957	0.0138367	Activated	0.981779	0.978277
NR1D2	0.0126695	0.0249056	0.0124179	0.0265599	0.0204823	0.0413422	0.0119674	0.0285328	Activated	1	1
KLF6	0.00572429	0.00762613	0.00451593	0.00714896	0.010518	0.0148258	0.00660439	0.0103256	Activated	0.884455	1
CLOCK	0.0190783	0.0223404	0.0188678	0.0225694	0.0242906	0.0300239	0.0196993	0.0245242	Activated	0.988971	0.999996
MXI1	0.0142121	0.0180972	0.0136915	0.0178316	0.0205844	0.024435	0.0135997	0.0202369	Activated	0.790319	0.999993
SRF	0.0150177	0.0153617	0.0145626	0.0163144	0.024633	0.0325655	0.0156639	0.0156169	Activated	0.374762	1
JDP2	0.00791105	0.00972522	0.00880551	0.00977809	0.0225889	0.0320523	0.0083557	0.0109295	Activated	0.268071	1
NFYB	0.00736273	0.00786799	0.0075593	0.00915118	0.0164149	0.0230432	0.00760102	0.00884856	Activated	0.10546	1
NR2F6	0.0095615	0.0106326	0.00961486	0.00928883	0.0175867	0.0229235	0.0106268	0.010853	Activated	0.817481	1
ESRRA	0.0131679	0.0136669	0.0122651	0.014024	0.0217692	0.0301639	0.013721	0.0157386	Activated	0.0234592	1
E2F4	0.0124507	0.0137246	0.0128354	0.0140062	0.0222208	0.0282792	0.0138339	0.0153012	Activated	0.397215	1
NR1H2	0.00538758	0.00604278	0.00547494	0.00683335	0.0164464	0.0242707	0.0062972	0.00893255	Activated	0.617287	1
DEAF1	0.0293318	0.0369626	0.0281825	0.0332482	0.0508629	0.060715	0.0278846	0.0336729	Activated	1	1
TFDP1	0.00982578	0.0118008	0.00915778	0.011	0.0150014	0.0196573	0.00784584	0.0113849	Activated	0.411534	0.983275
CREB1	0.012398	0.0141659	0.0124061	0.0137105	0.0206665	0.0251289	0.0123835	0.0168924	Activated	0.532175	0.999978
SP3	0.00987444	0.0114864	0.0100075	0.0118643	0.0180113	0.0212632	0.0101188	0.0130987	Activated	0.809063	0.99994
RBBP5	0.0088301	0.0108577	0.00985853	0.0109701	0.0172857	0.022027	0.00973814	0.0126441	Activated	0.708693	1
ELK4	0.00915217	0.0104992	0.00959023	0.0105314	0.0169907	0.022051	0.00912265	0.0120761	Activated	0.85496	0.999989
GABPB1	0.00830467	0.0104069	0.00882396	0.0101114	0.0171663	0.0224325	0.00838962	0.0119228	Activated	0.915377	1
NFYC	0.00243208	0.00318135	0.00256662	0.00426277	0.00753352	0.0114977	0.00254572	0.00505296	Activated	1	1
HDAC2	0.00495009	0.00666857	0.00528753	0.00662065	0.0118141	0.018474	0.00516343	0.00772643	Activated	0.725887	1
NR2C2	0.0110424	0.0130051	0.0115001	0.0129213	0.0176179	0.0249119	0.0106015	0.0139353	Activated	0.137625	0.999983
KLF7	0.00620652	0.00908858	0.00435755	0.00957735	0.0127047	0.0157262	0.0069054	0.00763893	Activated	1	1
RFX1	0.014733	0.0149107	0.0142019	0.0170256	0.0210305	0.0236417	0.0154414	0.0160115	Activated	0.983561	0.999134
BRF1	0.0135407	0.0144216	0.0130464	0.0157806	0.0240411	0.0253418	0.0143383	0.0165331	Activated	0.889938	0.999994
TAF1	0.0115729	0.0121067	0.011922	0.0135385	0.0187879	0.0199129	0.0119538	0.0133189	Activated	0.938727	1
ZNF652	0.00515454	0.00490425	0.00364299	0.00458974	0.0114464	0.0135402	0.00379704	0.00620192	Activated	1	1
MEF2D	0.00309637	0.00294929	0.00232775	0.00345148	0.0174577	0.0217078	0.00339652	0.00326875	Activated	1	1
STAT6	0.00278665	0.00327022	0.00249628	0.00413367	0.01859	0.0241741	0.00430209	0.00458237	Activated	1	1
GTF2B	0.00705539	0.00851544	0.00719493	0.00947027	0.0172534	0.0204616	0.00861398	0.00961139	Activated	0.95947	0.986733
RXRB	0.00422286	0.00472154	0.00389441	0.00549956	0.00999862	0.011937	0.00473382	0.0055372	Activated	1	1
GTF3A	0.00863887	0.00973396	0.00859542	0.00947802	0.0151489	0.0181707	0.00879927	0.01036	Activated	0.863216	0.965073
MXD1	0.00721014	0.00908031	0.00685815	0.00937095	0.0229416	0.0274777	0.00720612	0.00967991	Activated	1	1
MLXIPL	0.0376184	0.0394073	0.0370458	0.0387099	0.0481971	0.0364018	0.0359996	0.0393921	Activated	0.958662	0.952459
ZNF519	0.0051475	0.00651601	0.00557541	0.00884477	0.0123865	0.00659392	0.00576243	0.00829055	Activated	1	1
STAT5B	0.0120756	0.0132101	0.0138051	0.0135398	0.0192535	0.015934	0.0118273	0.0173819	Activated	0.986908	0.713504
CPEB1	0.0212063	0.02267	0.0205677	0.0247858	0.0266052	0.0211827	0.0208441	0.0262047	Activated	0.978427	0.932106
ZNF507	0.0137991	0.0210804	0.0153833	0.0209964	0.0319901	0.0188633	0.0178794	0.0296706	Activated	1	1
RCOR1	0.00750439	0.00712468	0.0109094	0.0183994	0.0158893	0.0163074	0.00709958	0.0123929	Activated	0.955405	0.946751
MXD4	0.0309083	0.032066	0.0284361	0.0343707	0.0375716	0.0349192	0.0304843	0.032102	Activated	0.788325	1
ARID3A	0.0077623	0.00725936	0.00824488	0.00914173	0.0120269	0.00906749	0.00736642	0.00842215	Activated	1	1
NR6A1	0.0159769	0.0177019	0.0171543	0.0221136	0.0330315	0.0249492	0.0164333	0.0206915	Activated	1	0.229431
ZNF141	0.00930458	0.00989841	0.00773917	0.0191859	0.0193715	0.015721	0.0199901	0.0148804	Activated	1	1
MGA	0.00920636	0.00757791	0.00754159	0.0111452	0.0126215	0.00650066	0.0112278	0.0078421	Activated	1	1
RUNX1	0.0210424	0.0188843	0.0168946	0.0208087	0.027342	0.0198725	0.0251125	0.02102	Activated	1	0.541344
SMAD2	0.0539218	0.0540512	0.0470799	0.0492118	0.0622467	0.0573466	0.058884	0.0456671	Activated	1	1
ATF6B	0.0182448	0.0176212	0.018964	0.0193512	0.0235695	0.0205044	0.0197576	0.0179793	Activated	0.997454	1
GLI4	0.0270242	0.0263561	0.0283532	0.0246141	0.0361932	0.030459	0.0305214	0.0233196	Activated	1	1
MEIS3	0.0195114	0.0144158	0.0160355	0.0254857	0.0270472	0.0321221	0.0214194	0.0126573	Activated	1	1
ACO1	0.00495671	0.00426073	0.00250648	0.00758681	0.0309609	0.0325407	0.0209617	0.0139126	Activated	1	1
NFE2L2	0.0187137	0.0167266	0.014547	0.019914	0.0253796	0.0249201	0.0242037	0.0215309	Activated	0.687811	0.92541
NR2F1	0.00289343	0.00459405	0.00229276	0.00445707	0.0111217	0.0158689	0.00980044	0.00332978	Activated	1	1
CIC	0.0125469	0.0135933	0.0134241	0.0122938	0.0202626	0.0204919	0.01476	0.0125634	Activated	1	1
POU6F1	0.00620993	0.00714146	0.00638525	0.0088447	0.0193272	0.0218981	0.0119668	0.00818959	Activated	1	1

## Sheet: Mathys ND
Table.S7. Details of the transcription factor lists and identified from the SCENIC algorithm with pathway enrichment analysis.
Separated-Mathys et al. (ND)	SCENIC calculated transcripton regulon activities in different sub-cluaters/layers
Transcription factors	ES	LS	L2/3	L4/5	L4/6	L5	L5/6	L6	TFStatusIdnetifiedByIntegratedDatasets	PvalueForUpMarkers	PvalueForDownMarkers	TFStatusInCurrentDataset			Pathway enrichment among activated transcription factors
SP3	0.0289355	0.0283301	0.01709	0.0176599	0.0143337	0.0199326	0.0160466	0.0103441	Activate_TFs	0.983503	0.745357	Activated			Index	Name	P-value
CREB1	0.0274627	0.0270165	0.0198563	0.0221081	0.0199545	0.0221343	0.0209195	0.0189648	Activate_TFs	0.885814	0.938488	Activated			1	TNF-alpha Signaling via NF-kB	5.431e-06
ELF2	0.0151389	0.0127402	0.00464506	0.00500321	0.00357102	0.00575049	0.00540137	0.00264408	Inhibite_TFs	1	1	Activated			2	Hypoxia	0.0004075
RFX4	0.0160872	0.0156969	0.0103174	0.00996014	0.00923662	0.012307	0.0123012	0.00891627	Novel	0.98085	1	Activated			3	Unfolded Protein Response	0.002153
CEBPB	0.0211774	0.0234638	0.0118147	0.0130267	0.01179	0.014063	0.0159535	0.0115834	Activate_TFs	0.800275	0.779678	Activated			4	G2-M Checkpoint	0.002786
SP4	0.0210808	0.0197323	0.0127988	0.0140583	0.0131062	0.0141503	0.0158357	0.0127845	Activate_TFs	0.95947	0.871407	Activated			5	IL-6/JAK/STAT3 Signaling	0.008491
CTCF	0.0268459	0.025551	0.0214556	0.0219696	0.0206777	0.0221815	0.0245868	0.0228877	Activate_TFs	0.521474	0.985655	Activated			6	mTORC1 Signaling	0.01579
TBP	0.019972	0.018695	0.0141042	0.0144115	0.0108224	0.0151016	0.0146352	0.0142194	Novel	0.746668	0.923637	Activated			7	Wnt-beta Catenin Signaling	0.01733
RFX1	0.0220597	0.0209358	0.0139762	0.0157751	0.0145701	0.0151439	0.0147019	0.0152371	Activate_TFs	1	1	Activated			8	UV Response Dn	0.03214
STAT2	0.0129129	0.0129758	0.00786503	0.00914959	0.00672859	0.00807949	0.00895471	0.0083742	Novel	1	1	Activated			9	DNA Repair	0.03562
NR2F1	0.0147803	0.014666	0.00450768	0.00664958	0.00853014	0.0120579	0.0056474	0.0132938	Activate_TFs	1	1	Activated			10	Apoptosis	0.0425
TFDP1	0.0412606	0.0386562	0.0301312	0.0352126	0.0326568	0.0340078	0.0310151	0.0365608	Activate_TFs	1	1	Activated
TCFL5	0.0200118	0.0216093	0.0147288	0.0146012	0.0160997	0.0175743	0.0177225	0.0165826	Novel	0.716164	1	Activated			Pathway enrichment among inhibited transcription factors
REL	0.0180277	0.0161573	0.0108205	0.0117993	0.0113014	0.0142856	0.0129842	0.0142653	Novel	1	0.405163	Activated			Index	Name	P-value
SETDB1	0.0237249	0.0236435	0.0162672	0.0155636	0.0146731	0.0190603	0.016103	0.0169526	Activate_TFs	0.987937	0.982272	Activated			1	TNF-alpha Signaling via NF-kB	0.00172
ZNF544	0.010711	0.0108201	0.00588519	0.00660298	0.00538928	0.00840205	0.00572168	0.00668493	Novel	1	1	Activated			2	UV Response Dn	0.003466
ZNF770	0.0127735	0.0226242	0.00878033	0.0108451	0.00646222	0.0113661	0.0111116	0.00449218	Novel	1	1	Activated			3	TGF-beta Signaling	0.02263
E2F4	0.0238089	0.0269163	0.019781	0.0225998	0.0199572	0.0231568	0.0215452	0.0190828	Activate_TFs	0.483044	0.98236	Activated			4	Cholesterol Homeostasis	0.04043
SIN3A	0.0229791	0.0266251	0.0162747	0.0188286	0.0152643	0.020761	0.0174553	0.0162904	Activate_TFs	0.473505	0.989697	Activated			5	Hypoxia	0.05515
POLR3A	0.0258385	0.0322554	0.00950238	0.0135106	0.00952153	0.0160853	0.0103655	0.0103666	Novel	0.566689	0.942532	Activated			6	Interferon Gamma Response	0.05515
UBP1	0.0133373	0.0172939	0.00240285	0.00388964	0.00262524	0.0063911	0.00306526	0.0025365	Novel	1	1	Activated			7	Hedgehog Signaling	0.1438
AGGF1	0.0182206	0.0261262	0.00682395	0.0109821	0.00656491	0.0102433	0.00764891	0.00649975	Novel	1	1	Activated			8	Wnt-beta Catenin Signaling	0.1657
CLOCK	0.039841	0.0514952	0.0188747	0.0264787	0.0188053	0.0275459	0.0209171	0.0207161	Activate_TFs	0.299	1	Activated			9	IL-2/STAT5 Signaling	0.211
JDP2	0.0181667	0.0225595	0.0099121	0.012215	0.0101087	0.0127119	0.00936415	0.00908696	Activate_TFs	0.502495	1	Activated			10	G2-M Checkpoint	0.2125
MAFG	0.0172279	0.0225937	0.0049556	0.008638	0.00605467	0.0093661	0.00638018	0.00492514	Novel	0.933801	1	Activated
CEBPZ	0.016295	0.0206252	0.011257	0.0118411	0.0110514	0.0134059	0.012368	0.0103231	Novel	0.705961	0.97799	Activated
TFAM	0.0222093	0.0341556	0.00614782	0.0137367	0.00818609	0.0116127	0.00954066	0.00521112	Novel	1	1	Activated
FOXO3	0.0126878	0.0175421	0.0059826	0.00831221	0.00455075	0.00797641	0.00736381	0.00509787	Inhibite_TFs	1	1	Activated
RXRB	0.00723226	0.0107259	0.00321794	0.004566	0.00267661	0.00502586	0.00355809	0.00253339	Activate_TFs	1	1	Activated
DBP	0.020558	0.0250121	0.0101762	0.0130866	0.0147652	0.0155902	0.0133485	0.00806969	Novel	0.901628	0.89109	Activated
FOXK1	0.0169967	0.0211392	0.00373871	0.00560774	0.00418429	0.0112489	0.00535234	0.00266019	Novel	1	1	Activated
KLF13	0.0112744	0.0130841	0.0061448	0.00656958	0.00660431	0.00869365	0.00638673	0.00564682	Novel	0.565698	0.997267	Activated
ATF2	0.0270787	0.0282653	0.0243393	0.0235448	0.0222177	0.0222004	0.023084	0.0218003	Inhibite_TFs	0.5803	0.970372	Activated
MECP2	0.0111274	0.0140164	0.00301184	0.00380681	0.00218045	0.00217797	0.00320175	0.00147988	Novel	1	1	Activated
NR2F6	0.010079	0.0153544	0.00554702	0.00726275	0.00458695	0.004878	0.00487255	0.00750172	Activate_TFs	0.280918	1	Activated
ZNF814	0.0112509	0.0190862	0.00167272	0.00175146	0.00205476	0.00158966	0.0020673	0.00293001	Activate_TFs	1	1	Activated
WRNIP1	0.0287115	0.036333	0.0178921	0.020654	0.0174338	0.018885	0.020184	0.0175622	Novel	0.708763	0.990551	Activated
DUSP26	0.0154686	0.0270674	0.0036694	0.00682132	0.00485005	0.00593234	0.0043732	0.00291762	Novel	1	1	Activated
STAT6	0.0180397	0.0278251	0.00300832	0.00656378	0.0047888	0.00547714	0.00437167	0.00282486	Activate_TFs	1	1	Activated
ELK4	0.0202171	0.0241502	0.0121335	0.0126222	0.0124624	0.014057	0.0111208	0.0142544	Activate_TFs	0.971769	0.999812	Activated
ARID3A	0.0169424	0.0209826	0.00372451	0.00581202	0.00305886	0.00691947	0.00408657	0.00776266	Activate_TFs	1	1	Activated
EMX1	0.0354448	0.0492705	0.00292396	0.00679471	0.00338563	0.00633593	0.0030758	0.0121306	Novel	1	1	Activated
SOX15	0.0141265	0.0186936	0.00378461	0.00413737	0.00285442	0.00498182	0.00458751	0.00539223	Novel	1	1	Activated
MNT	0.0318191	0.0362443	0.0171486	0.0206868	0.0180665	0.0229452	0.0179438	0.0246156	Novel	0.735658	1	Activated
ZNF135	0.0152455	0.0175495	0.00180735	0.00352134	0.00250854	0.00462445	0.00400274	0.00768419	Novel	1	1	Activated
ARG2	0.0376635	0.0393272	0.0117443	0.0150959	0.0144644	0.0195862	0.0166753	0.0149693	Novel	1	1	Activated
HIC2	0.0288158	0.0334873	0.00521764	0.00673893	0.00524087	0.00826769	0.00702997	0.00434038	Novel	1	1	Activated
NR1H3	0.0214747	0.0258143	0.00284536	0.00510101	0.00351267	0.00703605	0.00446675	0.00233708	Novel	1	1	Activated
ZNF81	0.0323272	0.0386402	0.00394396	0.00628098	0.00516996	0.00985636	0.00667868	0.0034705	Novel	1	1	Activated
PKNOX1	0.0250533	0.0314553	0.00161775	0.00309462	0.00351529	0.00658524	0.00343879	0.00195467	Novel	1	1	Activated
TRIM28	0.0326562	0.0385709	0.00193521	0.00445164	0.00362202	0.00865187	0.00408401	0.00261513	Activate_TFs	1	1	Activated
SMAD1	0.0206765	0.0251889	0.00335757	0.00640481	0.00558366	0.00619579	0.00356419	0.00610017	Novel	1	1	Activated
TFAP2E	0.0115466	0.0137252	0.000936447	0.00252184	0.00159119	0.00336479	0.00182412	0.00269996	Novel	1	1	Activated
SCRT1	0.0612817	0.0722691	0.0376332	0.0405023	0.0395517	0.0425764	0.0390007	0.0370148	Novel	0.498088	1	Activated
SMC3	0.0191424	0.0267336	0.000702393	0.00190798	0.00190655	0.00389762	0.00265874	0.002503	Novel	1	1	Activated
ZNF786	0.0168154	0.0246031	0.000520949	0.00116517	0.00105993	0.00241636	0.000811827	0.00158026	Novel	1	1	Activated
PHF8	0.0238672	0.0253219	0.0153506	0.0155302	0.0138248	0.016552	0.0157544	0.0157397	Activate_TFs	0.835918	0.988869	Activated
ZNF658	0.0174242	0.0188201	0.00834321	0.00864807	0.00756397	0.00964798	0.00975621	0.00985682	Novel	0.732666	1	Activated
GTF2B	0.0296959	0.0330387	0.013241	0.0106495	0.0111584	0.0140041	0.00944102	0.0121628	Activate_TFs	1	1	Activated
RCOR1	0.0274515	0.0279912	0.0217866	0.0191811	0.0198954	0.0210009	0.0209859	0.0203796	Activate_TFs	0.680545	0.97439	Activated
NEUROD2	0.0762184	0.164523	0.10238	0.14678	0.125241	0.132618	0.0963187	0.062696	Novel	1.88187e-06	1	Activated
RAD21	0.0392526	0.048772	0.0434161	0.0468875	0.0441613	0.0449842	0.0421806	0.0426585	Activate_TFs	0	0.951488	Activated
PRKAA1	0.0104868	0.0227475	0.00837632	0.0132521	0.00844889	0.0191482	0.0171678	0.00953878	Novel	0.0767461	1	Activated
HSF1	0.014735	0.0265989	0.015626	0.0179395	0.0170272	0.0216425	0.0167252	0.0161022	Novel	0.253742	1	Activated
KLF6	0.0104817	0.0231568	0.0064879	0.0151378	0.00874788	0.0181452	0.00995484	0.00916527	Activate_TFs	0.446733	1	Activated
PPARD	0.0107852	0.016221	0.00565165	0.00727602	0.00498472	0.0124967	0.00729256	0.00920707	Activate_TFs	0.545204	1	Activated
XBP1	0.0210293	0.0248446	0.0170308	0.019392	0.0172348	0.0221893	0.0172684	0.0183749	Novel	0.0637649	1	Activated
MAX	0.0229473	0.02737	0.0164967	0.0182624	0.0163736	0.0205505	0.017577	0.0196888	Activate_TFs	0.778868	0.999996	Activated
POLR2A	0.0280342	0.0346823	0.0221882	0.0227616	0.0229361	0.0251091	0.023527	0.0258653	Activate_TFs	0.0408797	0.996302	Activated
ESRRA	0.0302308	0.0384252	0.0195517	0.0210118	0.0198977	0.0231667	0.0190789	0.0211989	Activate_TFs	0.000322123	0.992429	Activated
GABPB1	0.0181216	0.0247324	0.011728	0.0124752	0.0118503	0.0149452	0.0120603	0.0123338	Activate_TFs	0.811558	0.999998	Activated
NR2C2	0.0223329	0.0305226	0.0144888	0.0170161	0.0165695	0.0173303	0.0169659	0.0162962	Activate_TFs	0.0146001	0.999972	Activated
E4F1	0.0212518	0.0304297	0.013668	0.0165824	0.014255	0.0176152	0.0157373	0.0174175	Novel	0.161621	1	Activated
EGR1	0.0198627	0.0258767	0.0148671	0.0166162	0.0141995	0.0172012	0.0154034	0.0166211	Activate_TFs	0.00021404	0.999466	Activated
TEF	0.0256187	0.0396088	0.0129575	0.0147411	0.0128443	0.0179089	0.0164104	0.0162999	Activate_TFs	0.054889	0.963376	Activated
NFYB	0.0252813	0.0351613	0.0153041	0.0179399	0.0160484	0.0186619	0.0173308	0.0183267	Activate_TFs	0.00983796	0.999984	Activated
STAT1	0.0197323	0.0289848	0.0120185	0.014041	0.0120153	0.0153282	0.0131416	0.014357	Activate_TFs	0.173897	1	Activated
MAZ	0.0205456	0.0293092	0.0172801	0.0195896	0.0179499	0.0189722	0.0170725	0.0182974	Activate_TFs	0.0163416	0.999546	Activated
BCLAF1	0.0291892	0.0359401	0.0280673	0.029139	0.0278343	0.0287033	0.0281707	0.0281119	Activate_TFs	4.02605e-05	0.99988	Activated
GTF2F1	0.0278747	0.0412014	0.0261961	0.0284977	0.0262281	0.0279627	0.0263718	0.0262211	Activate_TFs	1.37785e-10	0.985778	Activated
MXI1	0.0308606	0.0362379	0.0252969	0.0300894	0.0265337	0.0297401	0.0280532	0.0289864	Activate_TFs	0.00323939	0.997074	Activated
BHLHE41	0.0271233	0.0375638	0.0222155	0.0249195	0.0240298	0.0265971	0.0245837	0.0251905	Activate_TFs	4.31253e-05	0.993037	Activated
DDIT3	0.0175685	0.0346777	0.0113874	0.0148073	0.0133193	0.0176566	0.0140904	0.0132095	Novel	0.0179125	1	Activated
BRF1	0.0224201	0.0297486	0.0171038	0.019682	0.0177541	0.0213519	0.0203324	0.0176788	Activate_TFs	0.112101	0.995842	Activated
RBBP5	0.0229109	0.0337313	0.0174627	0.021765	0.0184475	0.0218966	0.0194288	0.0181375	Activate_TFs	6.81536e-05	0.999596	Activated
BHLHE40	0.022435	0.0331714	0.015016	0.018539	0.0148936	0.0189198	0.0166274	0.0163359	Activate_TFs	0.000104354	0.99985	Activated
HDAC2	0.0224211	0.0321371	0.0139648	0.0181134	0.0155865	0.0195167	0.014943	0.016151	Activate_TFs	0.00220489	0.998679	Activated
TAF7	0.0273822	0.0550936	0.0315978	0.0356455	0.035532	0.0331023	0.0314536	0.0386461	Activate_TFs	0	0.999315	Activated
YY1	0.0321699	0.0467234	0.0324922	0.0343763	0.0346843	0.0333033	0.0343115	0.0349109	Activate_TFs	1.08323e-06	0.999874	Activated
ATF4	0.0233785	0.0575468	0.0239729	0.0319694	0.0292245	0.0300135	0.0255781	0.0286308	Activate_TFs	0	0.998698	Activated
CREB3	0.0213799	0.0486836	0.0200515	0.0252144	0.0247777	0.024712	0.021062	0.0269427	Novel	0	0.999995	Activated
EWSR1	0.0229887	0.0266206	0.0233865	0.0211704	0.0229695	0.0216998	0.0193681	0.0206689	Novel	0.154915	0.732684	Activated
KLF9	0.0382508	0.0687141	0.0283113	0.0327808	0.0303989	0.0220373	0.0269421	0.0275476	Activate_TFs	1.35787e-09	1	Activated
PSMD12	0.0114553	0.0262343	0.00924719	0.010003	0.00922129	0.00731457	0.0107929	0.0090252	Novel	1	1	Activated
EGR3	0.0244242	0.0351934	0.0195655	0.0181208	0.0197934	0.0163935	0.017226	0.0227636	Activate_TFs	0.000262505	0.999998	Activated
JUN	0.0294235	0.0423418	0.0278247	0.0269963	0.0286045	0.0255043	0.0261612	0.029044	Activate_TFs	4.99266e-07	0.860062	Activated
EP300	0.030574	0.0243678	0.0289546	0.0283391	0.0257597	0.0312427	0.0256807	0.0329314	Novel	0.84359	0.82515	Inhibited
ATF6B	0.026328	0.0236762	0.0254862	0.024478	0.0232421	0.0255015	0.0237994	0.0241718	Activate_TFs	0.999576	0.943049	Inhibited
CHD2	0.0301985	0.0242566	0.0271499	0.0269148	0.0247899	0.0274014	0.0255157	0.0264337	Inhibite_TFs	0.998297	0.295282	Inhibited
NFATC3	0.0131909	0.00576506	0.00790691	0.00910215	0.00649296	0.0122835	0.00884229	0.00929414	Inhibite_TFs	1	1	Inhibited
TAF1	0.0310859	0.0217371	0.0262251	0.0254173	0.0244692	0.0266031	0.0263613	0.025835	Activate_TFs	0.993655	0.310106	Inhibited
GABPA	0.0286542	0.022445	0.0208155	0.0226671	0.0188189	0.0263905	0.0208489	0.0189155	Activate_TFs	0.994944	0.770191	Inhibited
NRF1	0.0213559	0.0152032	0.0140821	0.0157235	0.0126868	0.0193823	0.0138962	0.0159425	Inhibite_TFs	1	0.706222	Inhibited
ZNF148	0.0246566	0.0194505	0.016934	0.0182314	0.0157974	0.0241267	0.0161887	0.0173041	Novel	1	1	Inhibited
FOXJ3	0.0194772	0.0148561	0.0120752	0.0139378	0.011273	0.0142449	0.0138281	0.00943387	Novel	1	1	Inhibited
SMAD4	0.0217201	0.0197476	0.00941071	0.0146116	0.00907061	0.0173884	0.00881341	0.00476343	Novel	0.237127	1	Inhibited
ZFHX2	0.0278337	0.0259374	0.0145642	0.0181761	0.0111823	0.0219866	0.0182916	0.0118496	Activate_TFs	0.783033	1	Inhibited
TCF12	0.0265925	0.0193287	0.0145069	0.00526217	0.0104382	0.0224261	0.0111254	0.0116014	Inhibite_TFs	1	1	Inhibited
NPAS2	0.0131861	0.00851046	0.00475197	0.00527999	0.00401131	0.00697848	0.00527644	0.00394303	Novel	1	1	Inhibited
ZNF76	0.0285846	0.023046	0.0222321	0.0209691	0.0189626	0.0224256	0.0204491	0.020649	Activate_TFs	0.999921	0.934517	Inhibited
SMAD3	0.0301379	0.0155945	0.0256905	0.0126447	0.016005	0.00972296	0.0107263	0.0114248	Novel	1	1	Inhibited
ZBTB11	0.0236281	0.0207662	0.0223901	0.017118	0.0216874	0.019002	0.0136678	0.0140305	Novel	0.607734	1	Inhibited
STAT5B	0.0213956	0.00977115	0.0252418	0.0261478	0.0112462	0.0150558	0.0122423	0.00361132	Activate_TFs	1	0.297377	Inhibited
FOXN2	0.02482	0.015654	0.0200135	0.0166527	0.0142608	0.0190655	0.0163833	0.0107725	Inhibite_TFs	1	0.791009	Inhibited
ZSCAN31	0.0198255	0.0130199	0.0143083	0.0167903	0.0139757	0.0161412	0.0160628	0.00936968	Novel	1	0.719764	Inhibited
HCFC2	0.012966	0.0215738	0.0140973	0.0259865	0.0140197	0.0331627	0.0154206	0.00360125	Novel	1	1	Inhibited
STAT3	0.0234191	0.0217489	0.0201639	0.022635	0.018987	0.0269534	0.0225321	0.0220801	Novel	0.970488	0.793195	Inhibited
CTNNB1	0.0097772	0.00586334	0.00239803	0.0112471	0.00380691	0.0175628	0.00992314	0.00255493	Novel	1	1	Inhibited
POU2F1	0.0169349	0.0105269	0.00885662	0.011534	0.00659288	0.0212993	0.0118796	0.00683002	Novel	1	1	Inhibited
ETV5	0.0338546	0.0287882	0.0365739	0.0349575	0.0295447	0.0559667	0.0443017	0.0320521	Inhibite_TFs	0.486082	0.261547	Inhibited
IRF2	0.0154298	0.00963463	0.0129828	0.0156151	0.0117046	0.0254086	0.0137906	0.00908156	Activate_TFs	0.926907	0.448679	Inhibited
ZNF736	0.0119647	0.0104342	0.00656134	0.0199027	0.00957488	0.0446244	0.0155473	0.00770476	Novel	1	1	Inhibited
ZFP64	0.00718866	0.00987968	0.00390875	0.0133347	0.00448317	0.00493671	0.00750934	0.00403725	Novel	1	1	Inhibited
ZNF131	0.058475	0.0562685	0.0652215	0.0788184	0.0584522	0.0618002	0.0666563	0.0579152	Novel	1	1	Inhibited
ZNF235	0.0546055	0.0401309	0.065902	0.0807541	0.0658607	0.0596167	0.0693194	0.0540692	Novel	1	0.375407	Inhibited
LRRFIP1	0.0463708	0.0118822	0.0611063	0.0383018	0.0440454	0.0787971	0.0485014	0.0367883	Novel	1	1	Inhibited
NFIB	0.0627423	0.0332046	0.0882707	0.0721302	0.0764228	0.0738262	0.0958905	0.06966	Novel	0.989238	0	Inhibited
ZNF429	0.0237115	0.0154079	0.0243367	0.023058	0.0241989	0.0276528	0.0267577	0.0262538	Novel	1	0.763167	Inhibited
KDM5A	0.0328627	0.0234978	0.0305877	0.0277331	0.0280231	0.0283691	0.0328162	0.0269769	Inhibite_TFs	0.944264	0.863282	Inhibited
CERS4	0.0349905	0.0237525	0.03101	0.0332094	0.0299183	0.0369262	0.0383573	0.0284245	Novel	0.995395	0.0171723	Inhibited
NR2C1	0.0206089	0.0120967	0.0173523	0.0214873	0.0186313	0.0266734	0.022103	0.0115991	Activate_TFs	1	0.778687	Inhibited
KLF7	0.0301136	0.0427792	0.0433991	0.0501164	0.0484005	0.0449519	0.0743911	0.0332574	Activate_TFs	0.255676	1	Inhibited
IKZF2	0.0186773	0.0114456	0.0109661	0.0115523	0.0221095	0.0199912	0.0556634	0.00969526	Inhibite_TFs	1	1	Inhibited
ZFHX3	0.0329826	0.0115507	0.0352739	0.0274705	0.0365044	0.0578817	0.147423	0.0353386	Inhibite_TFs	1	0.00760021	Inhibited
ESRRG	0.0817663	0.0512208	0.0835108	0.096545	0.15047	0.128706	0.147976	0.139918	Novel	1	0.000583178	Inhibited
ZNF362	0.026359	0.0250385	0.0389004	0.037524	0.0429289	0.0545286	0.052489	0.0430804	Novel	1	1	Inhibited
BCL11A	0.0355734	0.0253972	0.0406406	0.0582566	0.0485603	0.0802199	0.0901882	0.0491686	Inhibite_TFs	0.958662	0.0105561	Inhibited
FOXN3	0.0423939	0.0261308	0.0524133	0.0653804	0.0600509	0.0741148	0.0785529	0.0552986	Inhibite_TFs	0.999864	5.10703e-15	Inhibited
ZNF91	0.348314	0.333165	0.621489	0.602091	0.646028	0.477524	0.593545	0.602837	Inhibite_TFs	9.6009e-07	0.000942952	Inhibited
NR3C1	0.0401212	0.0371245	0.0462876	0.0433872	0.0464582	0.0413361	0.0446978	0.0466958	Inhibite_TFs	0.057339	9.80095e-06	Inhibited
CERS5	0.0196675	0.012365	0.0265003	0.0258401	0.0264733	0.0186198	0.0267998	0.0304146	Novel	1	0.431558	Inhibited
UBE2K	0.0483167	0.0460039	0.0536869	0.0534623	0.053806	0.0510362	0.0550028	0.0558137	Activate_TFs	0.176493	0.662093	Inhibited
TCF4	0.272217	0.068351	0.475101	0.475296	0.45852	0.296875	0.281552	0.396572	Inhibite_TFs	1	0	Inhibited
CUX1	0.0722986	0.0381422	0.104396	0.0902353	0.0961904	0.0852832	0.0927051	0.0966128	Inhibite_TFs	0.356564	0	Inhibited
SOX5	0.0712861	0.0377716	0.100485	0.0952057	0.104902	0.0939073	0.101977	0.108159	Inhibite_TFs	0.941669	0	Inhibited
FOXP2	0.0644951	0.0357682	0.0930747	0.0966666	0.0938592	0.0985977	0.100317	0.0948788	Inhibite_TFs	0.437257	0	Inhibited
ZEB1	0.0584022	0.0369074	0.0764229	0.0810925	0.0787081	0.0739275	0.0815761	0.0736334	Inhibite_TFs	0.842484	0	Inhibited
NR6A1	0.0369058	0.0185167	0.0508732	0.0558778	0.0515065	0.047066	0.0478536	0.05649	Activate_TFs	1	0.161703	Inhibited
ZNF782	0.0326008	0.0238077	0.0364243	0.0385624	0.037517	0.0381173	0.0367222	0.0382939	Novel	0.882871	0.462191	Inhibited
UBTF	0.0390284	0.0356782	0.0386977	0.0365439	0.0380678	0.0346656	0.0349493	0.0387616	Activate_TFs	0.0105081	0.25746	Inhibited
RFX2	0.0355576	0.0177938	0.0416814	0.0281464	0.0328433	0.0215262	0.0308733	0.0379477	Inhibite_TFs	1	0.0628799	Inhibited
POU2F2	0.0432528	0.0249594	0.0451441	0.0237053	0.0419967	0.0291572	0.0352868	0.0490463	Inhibite_TFs	1	4.3391e-05	Inhibited
PUM3	0.0297636	0.0204777	0.0326278	0.0214551	0.0245564	0.0228357	0.0236165	0.031397	Novel	0.996571	0.513842	Inhibited
CEBPD	0.0559487	0.0596723	0.0640189	0.0561866	0.064448	0.0481699	0.0550289	0.063835	Activate_TFs	1.28359e-08	0.0318282	Inhibited
ATF1	0.0213556	0.0192643	0.0232479	0.0206784	0.0237773	0.0204417	0.0220054	0.0261341	Activate_TFs	1	1	Inhibited
ELK1	0.0531753	0.0460347	0.0646496	0.0539189	0.0650649	0.0451668	0.0542948	0.063121	Activate_TFs	0.00180006	0.0977437	Inhibited
MEF2A	0.0590161	0.0394225	0.0704791	0.0622021	0.0711786	0.0489726	0.0451307	0.0737945	Inhibite_TFs	1	0.581541	Inhibited
MYPOP	0.049028	0.0900481	0.0772573	0.101002	0.091307	0.0710417	0.0855394	0.0923163	Novel	0.0114061	1	Inhibited
NFE2L1	0.0650119	0.08417	0.0863365	0.0909746	0.0924691	0.083514	0.0854265	0.0868012	Novel	0	1.4683e-05	Inhibited
BAD	0.0434662	0.179404	0.103155	0.109509	0.142606	0.0841417	0.0808384	0.153168	Novel	0.000269612	1	Inhibited
HLF	0.0475941	0.0604807	0.0563383	0.0589108	0.0581528	0.0550078	0.0555091	0.055764	Activate_TFs	0	0.16074	Inhibited
PKM	0.139523	0.445873	0.378203	0.401064	0.436433	0.314687	0.340397	0.43064	Activate_TFs	0	1	Inhibited
TPI1	0.0790428	0.329466	0.220038	0.23741	0.286046	0.203797	0.207851	0.278312	Novel	0	1	Inhibited
ZBTB7A	0.0490075	0.0553709	0.0510356	0.0551322	0.0553664	0.0498042	0.05092	0.0509927	Activate_TFs	0	0.711507	Inhibited
ETS2	0.0441564	0.0547848	0.0511671	0.0524615	0.0554714	0.0483508	0.0512027	0.0516966	Activate_TFs	0	0.103337	Inhibited
JUND	0.0498462	0.0595471	0.0556628	0.0576172	0.0591725	0.0507093	0.0555854	0.0567413	Inhibite_TFs	0	0.88172	Inhibited
ATF6	0.028267	0.0252288	0.024818	0.0246988	0.0230518	0.0243116	0.0227573	0.0268689	Inhibite_TFs	0.965678	0.676722	Inhibited
ZFX	0.0170312	0.0139381	0.0128901	0.0128996	0.0123551	0.0127613	0.012556	0.0145829	Novel	0.808237	1	Inhibited
TBL1XR1	0.0463105	0.0458215	0.0339457	0.0323268	0.0341533	0.0281677	0.0350926	0.0453228	Inhibite_TFs	0.685818	1	Inhibited
TRPS1	0.032921	0.0293495	0.0208503	0.0172134	0.00797943	0.0130049	0.0276817	0.0495676	Novel	1	1	Inhibited
ONECUT2	0.0329629	0.0219458	0.0575964	0.0124011	0.00634545	0.0038109	0.00775847	0.0641134	Novel	1	0.19081	Inhibited
ZNF790	0.00727409	0.00780127	0.00804462	0.0099385	0.00404394	0.00616074	0.00452624	0.0120505	Novel	1	1	Inhibited
NR1H2	0.0280799	0.0486293	0.0294109	0.0319322	0.0329579	0.0337927	0.030595	0.049283	Activate_TFs	0.00148007	1	Inhibited
USF2	0.0327209	0.0437237	0.0337945	0.0342916	0.0359609	0.0325458	0.029553	0.0470448	Activate_TFs	3.34061e-05	0.341502	Inhibited
ARNTL	0.0246523	0.0270268	0.0232809	0.0225051	0.022772	0.0234745	0.0215562	0.030923	Novel	0.458859	1	Inhibited
CREM	0.0100611	0.00971606	0.00604317	0.00540209	0.00528415	0.0107074	0.00685194	0.021155	Novel	1	1	Inhibited
TEAD1	0.00783501	0.00800877	0.00673611	0.00943925	0.00826045	0.00756455	0.0175117	0.0194182	Inhibite_TFs	1	1	Inhibited
NFE2L2	0.0105134	0.0073714	0.00991697	0.00875873	0.0191952	0.0212511	0.0180355	0.0424376	Activate_TFs	1	0.59129	Inhibited
SREBF2	0.0349762	0.0346903	0.0355009	0.0406682	0.0401581	0.036856	0.0394125	0.0445893	Activate_TFs	0.230497	0.0617396	Inhibited
NFKB1	0.0287834	0.0243762	0.0232987	0.0253959	0.0271794	0.0228138	0.0301521	0.0285348	Activate_TFs	0.788325	0.18041	Inhibited
ARNT	0.0196405	0.0235686	0.0115142	0.0156785	0.018846	0.0109393	0.0199249	0.0207514	Inhibite_TFs	1	1	Inhibited
MEF2D	0.0532581	0.0610715	0.0525696	0.0528458	0.0562102	0.0460053	0.0567166	0.0555763	Activate_TFs	3.16612e-06	0.528516	Inhibited

## Sheet: Lau ND
Table.S7. Details of the transcription factor lists and identified from the SCENIC algorithm with pathway enrichment analysis.
Separated-Lau et al. (ND)	SCENIC calculated transcripton regulon activities in different sub-cluaters/layers
Transcription factors	ES	LS	L2/3	L4/5	L4/6	L5	L5/6	L6	TFStatusIdnetifiedByIntegratedDatasets	PvalueForUpMarkers	PvalueForDownMarkers	TFStatusInCurrentDataset			Pathway enrichment among activated transcription factors
ETV5	0.028841	0.0223075	0.0156757	0.0181204	0.0144756	0.0501289	0.0245417	0.0110524	Inhibite_TFs	0.388754	1	Inhibited			Index	Name	P-value
BACH2	0.0221941	0.0147808	0.0157465	0.0235875	0.0223195	0.0495116	0.0218868	0.0153895	Inhibite_TFs	1	1	Inhibited			1	TNF-alpha Signaling via NF-kB	1.217e-06
MZF1	0.0294541	0.029812	0.0307605	0.0301808	0.0300591	0.0379943	0.0332351	0.0287977	Novel	0.640856	0.958764	Inhibited			2	Hypoxia	7.222e-05
PPARGC1A	0.0204326	0.0150565	0.0217701	0.00801986	0.0103478	0.0185378	0.0186434	0.00584079	Activate_TFs	1	0.57156	Inhibited			3	Unfolded Protein Response	0.007631
STAT4	0.0175448	0.0105466	0.0227102	0.00557166	0.00668634	0.0214031	0.00409797	0.0025344	Novel	1	1	Inhibited			4	UV Response Dn	0.01733
HIVEP1	0.0180167	0.00995145	0.010949	0.0207567	0.0241626	0.0184921	0.0355839	0.0125676	Inhibite_TFs	1	0.315861	Inhibited			5	IL-6/JAK/STAT3 Signaling	0.02195
ZFHX3	0.0747827	0.0328724	0.0673369	0.0488357	0.0669211	0.0806734	0.207961	0.0627472	Inhibite_TFs	1	0.00940964	Inhibited			6	Wnt-beta Catenin Signaling	0.03355
BCL11A	0.0425042	0.0314842	0.0609079	0.0653572	0.0634093	0.0943323	0.0855695	0.0312664	Inhibite_TFs	1	0.220822	Inhibited			7	PI3K/AKT/mTOR Signaling	0.03555
CREM	0.0160866	0.0121247	0.0152717	0.014397	0.0167253	0.0165797	0.0179451	0.0122974	Novel	1	1	Inhibited			8	Interferon Gamma Response	0.0489
HIVEP2	0.0366793	0.0270966	0.0379183	0.0495787	0.0467917	0.0637423	0.0565433	0.0545404	Novel	1	0.444791	Inhibited			9	DNA Repair	0.0841
FOXN3	0.0549609	0.0313308	0.063842	0.109316	0.0907251	0.116313	0.12412	0.0787234	Inhibite_TFs	0.998704	4.21885e-15	Inhibited			10	UV Response Up	0.09469
POLR3G	0.0186424	0.0189904	0.0262266	0.0336879	0.0301775	0.0372862	0.0369022	0.0308353	Novel	0.597942	0.212241	Inhibited
MLXIPL	0.0495161	0.0425318	0.0532802	0.0554415	0.054019	0.0587953	0.0544795	0.0534425	Activate_TFs	0.691409	0.146009	Inhibited
FOXP2	0.060207	0.0409167	0.081397	0.0901753	0.0857453	0.0924772	0.0934029	0.0854516	Inhibite_TFs	0.971934	0	Inhibited			Pathway enrichment among inhibited transcription factors
ZEB1	0.0609567	0.037483	0.0835864	0.0942339	0.0895711	0.0866305	0.0909773	0.0878775	Inhibite_TFs	0.999999	0	Inhibited			Index	Name	P-value
ZNF721	0.0414828	0.0279488	0.0672474	0.049673	0.0608377	0.0675538	0.0577638	0.0647839	Novel	1	0.263509	Inhibited			1	UV Response Dn	0.004989
NFIB	0.0725221	0.0459877	0.112033	0.09423	0.101893	0.0957323	0.112099	0.100496	Novel	0.997359	0	Inhibited			2	G2-M Checkpoint	0.01225
PBX1	0.279085	0.104064	0.570113	0.494758	0.47858	0.494404	0.535005	0.35336	Inhibite_TFs	1	0	Inhibited			3	Hypoxia	0.08323
PKNOX2	0.0699791	0.0367529	0.110614	0.121939	0.0981758	0.0752449	0.0774164	0.0765079	Novel	0.991573	1.11022e-15	Inhibited			4	Myogenesis	0.08323
NFATC3	0.0490134	0.0344933	0.0534256	0.0549963	0.0530572	0.0506458	0.0570749	0.0455452	Inhibite_TFs	1	0.291151	Inhibited			5	TGF-beta Signaling	0.1218
PPARG	0.031371	0.0104977	0.0436728	0.036006	0.033931	0.0373936	0.0345758	0.0250835	Inhibite_TFs	1	0.012755	Inhibited			6	Cholesterol Homeostasis	0.1632
ONECUT2	0.0604254	0.0474479	0.109407	0.0451133	0.0846781	0.0117885	0.0486078	0.0887968	Novel	0.0280173	0.228012	Inhibited			7	TNF-alpha Signaling via NF-kB	0.3831
E2F3	0.0483307	0.0255798	0.0769196	0.0369764	0.051302	0.0308317	0.0396789	0.0512352	Inhibite_TFs	0.864321	0.0113955	Inhibited			8	heme Metabolism	0.3831
POU2F2	0.0274728	0.0149309	0.0347488	0.0228492	0.0291731	0.0145961	0.0212089	0.0272365	Inhibite_TFs	0.899163	0.170755	Inhibited			9	Adipogenesis	0.3831
ARNT2	0.080453	0.0658994	0.154066	0.0775409	0.0991412	0.0727616	0.0779654	0.0795259	Novel	1	0.0846816	Inhibited			10	Allograft Rejection	0.3831
CUX2	0.19059	0.0444118	0.419475	0.20311	0.247821	0.188604	0.164407	0.311964	Novel	1	0	Inhibited
HMBOX1	0.0572217	0.0450141	0.0590521	0.0527551	0.0584838	0.0417062	0.0410321	0.0346087	Novel	0.325481	0.313725	Inhibited
SMAD4	0.028066	0.0255059	0.035591	0.0299563	0.031832	0.0221003	0.0347853	0.0266996	Novel	1	0.756768	Inhibited
NFE2L2	0.0221591	0.0151261	0.0171002	0.0185182	0.0225741	0.0216368	0.0198191	0.0297187	Activate_TFs	1	1	Inhibited
PBX3	0.036263	0.0155409	0.0390657	0.0274549	0.0436088	0.0271979	0.0286323	0.106805	Inhibite_TFs	1	0.0782518	Inhibited
ZNF568	0.0249361	0.0225382	0.0192344	0.0229616	0.0180527	0.0414899	0.0365013	0.134592	Novel	1	1	Inhibited
TCF12	0.0457776	0.0261295	0.0456852	0.0319111	0.0699789	0.0459353	0.0469126	0.0596895	Inhibite_TFs	1	0.714679	Inhibited
MEIS2	0.198215	0.0477678	0.354948	0.116532	0.233411	0.254589	0.308076	0.229616	Novel	1	3.8875e-07	Inhibited
RCOR1	0.0313267	0.0175508	0.0350576	0.0217163	0.0278307	0.0326604	0.0370228	0.0407148	Activate_TFs	1	0.173981	Inhibited
KDM5A	0.0485724	0.0386489	0.0570428	0.0501619	0.0552451	0.0514303	0.0538925	0.0599894	Inhibite_TFs	0.505153	5.40068e-09	Inhibited
PUM3	0.12727	0.0535218	0.156328	0.106155	0.1406	0.114634	0.154017	0.170825	Novel	1	0.00150803	Inhibited
CUX1	0.102343	0.0398954	0.167662	0.138137	0.150391	0.111649	0.118966	0.222109	Inhibite_TFs	0.987451	0	Inhibited
MEF2A	0.0811224	0.0615388	0.183965	0.160945	0.186355	0.113192	0.121092	0.224559	Inhibite_TFs	1	0.0777732	Inhibited
SMAD1	0.0476843	0.0251103	0.0531204	0.0655285	0.0690482	0.0535113	0.0668231	0.0929488	Novel	1	0.18041	Inhibited
CHD2	0.0410998	0.0383927	0.0450898	0.0436416	0.0471342	0.0426548	0.0455665	0.0524961	Inhibite_TFs	0.932625	0.183673	Inhibited
TRPS1	0.114732	0.0363723	0.190214	0.12153	0.187863	0.112464	0.16259	0.293969	Novel	1	1.13189e-10	Inhibited
NRF1	0.0428515	0.027603	0.0483198	0.0504041	0.0513219	0.0502731	0.0501852	0.0572601	Inhibite_TFs	1	1.25586e-06	Inhibited
SOX5	0.147881	0.0503582	0.212063	0.230625	0.246215	0.221027	0.21028	0.276273	Inhibite_TFs	1	0	Inhibited
BPTF	0.0386087	0.0238666	0.0400948	0.0390879	0.0438719	0.0398956	0.042818	0.0467702	Inhibite_TFs	1	0.221066	Inhibited
TAF1	0.0331185	0.0269888	0.0334808	0.0327787	0.0339892	0.0340348	0.0336436	0.0375747	Activate_TFs	0.840869	0.0282349	Inhibited
MEF2C	0.194493	0.160313	0.270906	0.302795	0.295557	0.237649	0.23754	0.289476	Inhibite_TFs	1	0.375407	Inhibited
NR3C1	0.0451341	0.0378632	0.0595929	0.056246	0.0582805	0.0510547	0.0587688	0.06196	Inhibite_TFs	0.999975	0	Inhibited
ZNF91	0.0759318	0.05213	0.109896	0.10721	0.112713	0.0972468	0.103741	0.113475	Inhibite_TFs	0.178929	0	Inhibited
GTF2B	0.0267337	0.0213612	0.0157752	0.0186046	0.0199618	0.0186297	0.0215444	0.0156894	Activate_TFs	0.923196	0.436443	Activated
ZNF135	0.0101479	0.0042756	0.00172817	0.00179147	0.00189854	0.00330192	0.00453168	0.00189543	Novel	1	1	Activated
ZNF76	0.0160427	0.0120099	0.00465245	0.0058943	0.00574723	0.00795866	0.00901105	0.00539454	Activate_TFs	1	1	Activated
NFYC	0.0222986	0.0108389	0.00439887	0.00488772	0.00522989	0.00926252	0.00627821	0.00381198	Activate_TFs	1	1	Activated
ZNF131	0.0110513	0.00530458	0.00245581	0.00306172	0.00262318	0.00485846	0.00251301	0.00187176	Novel	1	1	Activated
ZNF362	0.0145848	0.00820789	0.0044473	0.00539831	0.00440871	0.00682611	0.00473812	0.00363008	Novel	1	1	Activated
STAT5B	0.0176279	0.00948342	0.000605311	0.001349	0.00176221	0.00435016	0.00303953	0.00154686	Activate_TFs	1	1	Activated
CERS4	0.0315477	0.0135622	0.000478057	0.00136766	0.00236174	0.00642985	0.00159137	0.00266445	Novel	1	1	Activated
SP3	0.0184636	0.0112457	0.00470792	0.0058056	0.0058899	0.00810089	0.00559098	0.00558714	Activate_TFs	0.966102	1	Activated
TCF7L2	0.0254184	0.013438	0.00220378	0.00355801	0.00338584	0.00711945	0.00321892	0.003114	Activate_TFs	1	1	Activated
RFX1	0.021176	0.013433	0.00113326	0.00250085	0.00450727	0.00575935	0.00233813	0.00242597	Activate_TFs	1	1	Activated
TRMT1	0.0376386	0.0216923	0.00292523	0.00452201	0.00523345	0.00896338	0.00379642	0.00305623	Novel	1	1	Activated
SMAD2	0.0157188	0.00801722	0.000465107	0.000970865	0.00148946	0.00195351	0.00103856	0.00138022	Activate_TFs	1	1	Activated
SMAD5	0.0126094	0.00684156	0.000193864	0.000699706	0.0010919	0.00188033	0.000748209	0.00076264	Novel	1	1	Activated
GABPA	0.0221661	0.0179157	0.0137955	0.0143136	0.0134556	0.0142608	0.0138683	0.0155824	Activate_TFs	0.999825	0.980013	Activated
FOXK2	0.0140173	0.00504168	0.000336407	0.00152558	0.00146288	0.0028259	0.00105836	0.00175339	Novel	1	1	Activated
STAT2	0.016658	0.00924308	0.00476906	0.00541394	0.00644674	0.00744356	0.00617854	0.00773128	Novel	1	1	Activated
RB1	0.0200529	0.0193749	0.0112738	0.0177937	0.0162371	0.0138764	0.0161503	0.0166202	Novel	1	0.95973	Activated
STAT3	0.0174437	0.0156805	0.00593051	0.00721384	0.00855715	0.0113263	0.0118048	0.0119352	Novel	0.944341	0.759598	Activated
FOXJ3	0.0277894	0.0230244	0.00947251	0.0101027	0.0100159	0.0124518	0.0108209	0.011931	Novel	1	0.868404	Activated
TBPL1	0.0155058	0.0111765	0.00176667	0.00247043	0.00203913	0.00336245	0.00290412	0.00141273	Novel	1	1	Activated
HSF1	0.0200214	0.0173003	0.0027565	0.00377282	0.00409605	0.00721318	0.00552643	0.00269683	Novel	1	1	Activated
POU6F1	0.0131482	0.011531	0.000602371	0.00148239	0.00152152	0.00366611	0.000881413	0.00122394	Activate_TFs	0.510305	1	Activated
CCNT2	0.0359615	0.0329787	0.00353063	0.00444803	0.00442626	0.006913	0.00472361	0.00495663	Novel	1	1	Activated
KLF7	0.0158444	0.0136134	0.00121443	0.00232723	0.00225185	0.00391232	0.0022811	0.00262031	Activate_TFs	1	1	Activated
FOXN2	0.0215588	0.0220876	0.0125447	0.0114544	0.0203839	0.0178618	0.0174852	0.0144022	Inhibite_TFs	1	1	Activated
SP4	0.0294461	0.0269555	0.0271779	0.0249963	0.0278808	0.0280991	0.0269396	0.0263663	Activate_TFs	0.805441	0.937178	Activated
EP300	0.0252233	0.0202629	0.0182883	0.0192274	0.0192905	0.0215947	0.0184537	0.0149456	Novel	1	1	Activated
NFKB1	0.0161504	0.00807751	0.00834829	0.00728254	0.00755903	0.0119347	0.00915012	0.00672845	Activate_TFs	1	1	Activated
ZNF789	0.0242073	0.011516	0.0127659	0.0116236	0.0122094	0.0158767	0.0116583	0.00762973	Novel	1	1	Activated
GABPB1	0.0146671	0.0131329	0.00894476	0.0111819	0.00935095	0.0122693	0.00993605	0.0083575	Activate_TFs	0.980212	0.999284	Activated
ZFX	0.016483	0.0147396	0.0053647	0.00708076	0.00619624	0.013957	0.00826188	0.00733754	Novel	0.904032	1	Activated
IRF2	0.0188431	0.0152719	0.00760452	0.0083285	0.0079629	0.0143392	0.00896578	0.00678703	Activate_TFs	1	0.49472	Activated
PKNOX1	0.0133515	0.0119294	0.00337041	0.00450597	0.00368965	0.00999717	0.00460968	0.00314369	Novel	1	1	Activated
SETDB1	0.0242431	0.0212659	0.015108	0.0197002	0.0173163	0.0254019	0.0181407	0.0171772	Activate_TFs	0.998786	0.947681	Activated
CTCF	0.0222344	0.0186104	0.0178043	0.0180127	0.0173587	0.0209675	0.0173246	0.0186485	Activate_TFs	0.945983	0.964506	Activated
SREBF1	0.0215387	0.0165001	0.0130352	0.0155202	0.0140793	0.0181355	0.0153137	0.0141815	Novel	0.999321	0.950331	Activated
ATF1	0.0395822	0.0277937	0.0252959	0.0281425	0.0288222	0.0324667	0.0384316	0.0292975	Activate_TFs	1	0.810595	Activated
ETV6	0.0141918	0.0105322	0.00560765	0.00748283	0.00515057	0.0124204	0.0180353	0.00482507	Novel	1	1	Activated
NPAS2	0.0247824	0.0124566	0.0148844	0.013053	0.0140021	0.00613112	0.0186777	0.00964469	Novel	1	1	Activated
ZNF831	0.0151388	0.00934986	0.00837621	0.00724535	0.00824774	0.00851601	0.0126447	0.01266	Novel	1	1	Activated
ELF2	0.0306229	0.0219515	0.0278755	0.0279279	0.0275915	0.0258969	0.02609	0.0272544	Inhibite_TFs	0.999992	0.77177	Activated
MGA	0.0254085	0.0157341	0.021297	0.0231368	0.0239856	0.0224185	0.0246063	0.024628	Activate_TFs	1	0.851724	Activated
ATF6	0.0156237	0.00894366	0.0117636	0.0136131	0.012481	0.0137813	0.0118461	0.0160937	Inhibite_TFs	1	1	Activated
TFCP2	0.0594432	0.0259864	0.0291647	0.0370933	0.0382905	0.0462852	0.0375067	0.0494957	Novel	1	1	Activated
ZFP64	0.0141591	0.00744775	0.00913013	0.00946236	0.00978082	0.0107621	0.00934134	0.00990684	Novel	1	0.935304	Activated
RBPJ	0.0179491	0.00899195	0.0068014	0.00907474	0.0102604	0.0098682	0.00690089	0.00804442	Novel	1	1	Activated
NR2C1	0.0271028	0.0164073	0.0141019	0.0155942	0.0161611	0.0186591	0.0172884	0.0197765	Activate_TFs	1	0.762443	Activated
RUNX1	0.0320101	0.0140473	0.0117043	0.0173929	0.0160239	0.0166544	0.0170819	0.0196309	Activate_TFs	1	0.773399	Activated
HBP1	0.0300035	0.0185292	0.0115252	0.0143678	0.0154161	0.0201506	0.0133653	0.0259372	Activate_TFs	1	1	Activated
HSF4	0.0271091	0.0217909	0.0186897	0.0236693	0.0175817	0.0223808	0.0151919	0.0251452	Novel	1	1	Activated
POU3F2	0.020595	0.038051	0.0193894	0.0319133	0.0197375	0.014728	0.0133551	0.0319763	Novel	1	1	Activated
ATF2	0.0352522	0.0463976	0.0425966	0.0392581	0.0392793	0.0385833	0.0406307	0.040768	Inhibite_TFs	0.0124957	0.999551	Activated
NR1D2	0.031806	0.0971118	0.054232	0.0617195	0.0572991	0.0399048	0.0519937	0.0505224	Activate_TFs	0.198635	1	Activated
ELK1	0.0530744	0.0874332	0.067757	0.067627	0.0683092	0.064192	0.0673121	0.0651212	Activate_TFs	0	2.84103e-05	Activated
JUND	0.0436698	0.0683225	0.0533678	0.0529581	0.0528677	0.050172	0.0523004	0.0522527	Inhibite_TFs	0	1.53222e-11	Activated
PKM	0.0979103	0.527486	0.288559	0.267212	0.26595	0.208634	0.243987	0.254034	Activate_TFs	0	1	Activated
UBTF	0.0511961	0.0817955	0.0652011	0.0644613	0.064655	0.0454573	0.0526154	0.0641924	Activate_TFs	0.000354401	0.812141	Activated
ZNF189	0.0420635	0.0864394	0.0628341	0.0338007	0.0458942	0.0287111	0.0385314	0.0428616	Novel	0.0155604	1	Activated
MEIS3	0.0401538	0.0546605	0.0451693	0.0612651	0.077947	0.046057	0.0857305	0.074043	Activate_TFs	1	0.561341	Activated
ZBTB7A	0.0444469	0.0553369	0.0570402	0.0544926	0.0549256	0.0500841	0.053051	0.0545365	Activate_TFs	4.81704e-12	4.32494e-05	Activated
ZNF706	0.0429586	0.0737016	0.0583837	0.0635778	0.0754379	0.056849	0.0546011	0.079273	Novel	1	1	Activated
ZNF358	0.033989	0.0457155	0.0321621	0.0314851	0.0330071	0.034914	0.0357192	0.0287993	Novel	0.25488	0.816791	Activated
ZNF623	0.0179328	0.0285756	0.0186488	0.0148955	0.0136931	0.0157124	0.0253845	0.0113472	Novel	0.644579	1	Activated
RAB14	0.00470306	0.0125205	0.00089191	0.00159458	0.00155854	0.000675904	0.00187692	0.00105621	Novel	0.115742	1	Activated
MEF2D	0.0261473	0.0632168	0.0171635	0.0156576	0.0153074	0.0141281	0.0151053	0.0154567	Activate_TFs	0.000678847	1	Activated
ZNF155	0.00300108	0.0151029	0.000387745	0.000980529	0.00074308	0.00118127	0.000803095	0.00136015	Novel	1	1	Activated
KLF6	0.0261786	0.0558848	0.0183764	0.0204188	0.0179074	0.0205283	0.0190461	0.0177525	Activate_TFs	9.13696e-06	1	Activated
ESRRA	0.0236492	0.0484941	0.0192136	0.019947	0.0186533	0.0201214	0.0183827	0.0191229	Activate_TFs	6.66134e-16	0.998945	Activated
CREBL2	0.025864	0.0587104	0.0202817	0.0208716	0.0178712	0.0200466	0.0187586	0.0188582	Activate_TFs	8.39662e-13	0.991768	Activated
HDAC2	0.023236	0.0423372	0.019706	0.0203644	0.0183665	0.0204097	0.0190163	0.0186507	Activate_TFs	1.22002e-11	0.999971	Activated
SMARCC2	0.0252423	0.0545293	0.0197424	0.021638	0.0192882	0.0198751	0.0198385	0.0163804	Activate_TFs	0	0.999939	Activated
CEBPB	0.029475	0.062431	0.0258659	0.0249995	0.023787	0.0251267	0.0252324	0.0223156	Activate_TFs	0	0.999957	Activated
NR2C2	0.0208844	0.039908	0.0184582	0.0184209	0.0167135	0.0183184	0.0172554	0.0158561	Activate_TFs	0.0116595	0.98499	Activated
BHLHE40	0.0258312	0.0671303	0.0233407	0.0241202	0.0226244	0.0224045	0.0240862	0.0197113	Activate_TFs	0	1	Activated
YY1	0.032994	0.0614396	0.031594	0.030689	0.0284703	0.0289391	0.0291022	0.0286405	Activate_TFs	8.88178e-16	0.969921	Activated
BHLHE41	0.0280613	0.0699249	0.0260577	0.0268183	0.0239137	0.0238598	0.0232278	0.0212743	Activate_TFs	0	0.999936	Activated
EGR1	0.0290544	0.0813046	0.0288265	0.0303577	0.0266937	0.0263883	0.0246339	0.0241395	Activate_TFs	0	1	Activated
CREB1	0.0278893	0.0378323	0.0264453	0.0267434	0.0259778	0.0281086	0.0269588	0.0256986	Activate_TFs	0.388406	0.998281	Activated
POLR2A	0.0265403	0.0522351	0.0206849	0.0220612	0.0204214	0.0256975	0.0212836	0.0207718	Activate_TFs	0	1	Activated
ETS2	0.028075	0.0700815	0.0286205	0.0291304	0.0273634	0.0296322	0.0275234	0.0255265	Activate_TFs	0	0.999532	Activated
NEUROD2	0.0122562	0.052661	0.0103062	0.0126333	0.0118977	0.0128762	0.0113952	0.00751396	Novel	0.0136805	1	Activated
CEBPG	0.0295401	0.0672173	0.0256759	0.0283945	0.0250891	0.0288884	0.0256522	0.0245902	Activate_TFs	6.21725e-15	0.991509	Activated
ATF4	0.0258721	0.0738034	0.0225824	0.0247605	0.0221942	0.0251271	0.022358	0.0199529	Activate_TFs	0	1	Activated
KLF13	0.0294117	0.0565496	0.0267654	0.028182	0.0269255	0.0289169	0.0277592	0.0261562	Novel	5.16289e-11	0.823647	Activated
PRDX5	0.0147975	0.0919613	0.00792435	0.0103488	0.00749797	0.0140281	0.00863841	0.00917774	Novel	4.88343e-12	1	Activated
TAF7	0.0213003	0.0594824	0.0160701	0.0176945	0.0155896	0.0189528	0.0156913	0.0152371	Activate_TFs	0	1	Activated
SREBF2	0.0355174	0.058374	0.0358635	0.0382378	0.0370707	0.0371937	0.0365609	0.0377218	Activate_TFs	0	0.952734	Activated
TEF	0.0394857	0.0795168	0.0466576	0.047083	0.0464169	0.0424099	0.0452444	0.0449629	Activate_TFs	0	0.0249482	Activated
HLF	0.0350652	0.0798748	0.0436751	0.0427575	0.0413388	0.0409137	0.0409587	0.0393806	Activate_TFs	0	0.985699	Activated
KLF9	0.038917	0.104842	0.0528917	0.0525555	0.0501065	0.0510227	0.0475758	0.0497881	Activate_TFs	0	0.847383	Activated
EGR3	0.023071	0.0581281	0.0218551	0.0178515	0.0189997	0.0154233	0.0168297	0.0189573	Activate_TFs	0	0.99994	Activated
KLF16	0.0289103	0.0596305	0.0280414	0.0237115	0.0240487	0.0220995	0.0240004	0.0253888	Activate_TFs	2.59119e-11	0.973957	Activated
TRIM28	0.0453652	0.124921	0.0481531	0.0439514	0.0452568	0.0399476	0.0383761	0.0465357	Activate_TFs	7.59496e-08	0.645207	Activated
JUN	0.0262414	0.0741949	0.0273716	0.0243852	0.0246416	0.0232528	0.0249462	0.0239055	Activate_TFs	0	1	Activated
USF2	0.0372259	0.110285	0.0438298	0.0413911	0.041114	0.0342929	0.0386951	0.0370211	Activate_TFs	0	0.971114	Activated
RAD21	0.0314456	0.0830646	0.0342193	0.0354154	0.0325626	0.0316095	0.0322591	0.0298003	Activate_TFs	0	1	Activated
MAZ	0.0321242	0.0772012	0.0343566	0.0338521	0.0322929	0.0317361	0.031088	0.0299107	Activate_TFs	0	0.999159	Activated
NFE2L1	0.031644	0.0745003	0.0344392	0.0328636	0.0322983	0.0309844	0.0312986	0.0305329	Novel	0	0.9866	Activated
CEBPD	0.033167	0.0723704	0.0367464	0.0338081	0.0317712	0.0303537	0.0364675	0.0297704	Activate_TFs	0	0.446353	Activated
THRA	0.0494671	0.132918	0.0636404	0.0526734	0.0547268	0.0455773	0.0558651	0.0551354	Activate_TFs	6.18394e-14	0.805318	Activated
FOXO3	0.0465142	0.0514425	0.0435373	0.0460239	0.0389665	0.0380412	0.0384892	0.040336	Inhibite_TFs	1	1	Activated
SCRT1	0.0282498	0.0383682	0.0287828	0.0268255	0.0264823	0.0240639	0.0260407	0.0233629	Novel	0.0380656	1	Activated
ZNF471	0.023389	0.0317601	0.020901	0.0188264	0.0177438	0.0172609	0.0189624	0.0141588	Novel	0.403624	1	Activated
LHX2	0.0241559	0.0327832	0.019329	0.0235025	0.0189084	0.021437	0.0188695	0.0224435	Inhibite_TFs	0.62192	0.868404	Activated
BRF1	0.025007	0.0332969	0.0212512	0.020505	0.0208258	0.0219227	0.0203173	0.0218235	Activate_TFs	0.657135	0.9799	Activated
E2F4	0.0231618	0.0374064	0.0134458	0.0143095	0.0133391	0.0156113	0.0134418	0.0130894	Activate_TFs	1.30671e-07	0.999992	Activated
NR2F1	0.0104727	0.0212938	0.00285131	0.00553059	0.00368863	0.00577588	0.00339774	0.00510636	Activate_TFs	0.334564	1	Activated
GTF3A	0.00586986	0.011976	0.00182757	0.00269215	0.00111141	0.00372217	0.00173331	0.00214415	Activate_TFs	1	1	Activated
RBBP5	0.0220486	0.0343222	0.0125712	0.0152149	0.0118361	0.0157537	0.0127708	0.0132945	Activate_TFs	3.07011e-05	0.999902	Activated
BCLAF1	0.0281961	0.0357978	0.0268559	0.0267983	0.0258504	0.0283975	0.0250876	0.0262675	Activate_TFs	0.241933	0.998724	Activated
FOXG1	0.0166068	0.0367759	0.010212	0.0110234	0.00757224	0.0119648	0.00914559	0.0058785	Activate_TFs	0.317006	1	Activated
ELK4	0.0170472	0.0297562	0.0115261	0.0118095	0.0106163	0.0133244	0.0117327	0.010533	Activate_TFs	0.00165688	0.999999	Activated
SIN3A	0.0192256	0.03949	0.0127225	0.0132456	0.0116692	0.0150162	0.0124377	0.0122025	Activate_TFs	1.3818e-06	1	Activated
NR1H2	0.0145306	0.020619	0.00521151	0.00675523	0.0050783	0.0090403	0.0082204	0.00465127	Activate_TFs	0.772792	1	Activated
EMX1	0.0207595	0.036091	0.00549332	0.00809781	0.00735269	0.0101309	0.00790095	0.00473688	Novel	0.0261057	1	Activated
SMC3	0.0125296	0.0213808	0.00394056	0.00500938	0.00437983	0.00772631	0.00516316	0.00266445	Novel	1	1	Activated
FOXK1	0.0207947	0.0379421	0.00735711	0.00747128	0.00825402	0.0183677	0.00943477	0.00677229	Novel	0.388754	1	Activated
MAX	0.022607	0.0300028	0.0156445	0.0172674	0.0154473	0.0199115	0.0161366	0.0135716	Activate_TFs	0.0759372	0.998951	Activated
ZNF281	0.00713968	0.0116517	0.0026424	0.00439898	0.00511508	0.00298133	0.0046119	0.0029543	Activate_TFs	1	1	Activated
RBM17	0.0173524	0.0236804	0.00969074	0.0112731	0.0106531	0.0105706	0.010096	0.0121431	Novel	0.477676	1	Activated
RXRB	0.0203626	0.0250694	0.00643409	0.00941496	0.0101869	0.0118005	0.00955235	0.0118737	Activate_TFs	1	1	Activated
MXI1	0.0248918	0.0299419	0.0216124	0.0254455	0.0247438	0.0296005	0.0245298	0.0236598	Activate_TFs	0.548516	0.999093	Activated
ZNF429	0.00944002	0.0167885	0.00431954	0.00481447	0.00767363	0.0102817	0.00574718	0.00919015	Novel	1	1	Activated
ARNT	0.0207373	0.0245424	0.0146671	0.0164497	0.0156165	0.019175	0.0186232	0.0177552	Inhibite_TFs	0.767286	0.993698	Activated
HSF2	0.0146316	0.0184801	0.00656578	0.00917054	0.00753824	0.0133078	0.00796961	0.010016	Novel	1	1	Activated
ARNTL	0.0303937	0.0313835	0.0291904	0.0279699	0.0273691	0.0296514	0.0266381	0.0288725	Novel	0.356347	0.788244	Activated
HES4	0.0154103	0.020183	0.00948263	0.0133393	0.00828631	0.0159548	0.00901458	0.00710132	Inhibite_TFs	1	1	Activated
ZNF33B	0.00963322	0.0117488	0.00406698	0.00447514	0.00286346	0.00762455	0.00419176	0.00166797	Novel	0.485567	1	Activated
PHF8	0.021258	0.0218348	0.0124522	0.0144792	0.0122661	0.0153612	0.0154189	0.0114668	Activate_TFs	0.999135	0.994591	Activated
ZNF692	0.0166597	0.0165125	0.00913947	0.00949795	0.0107801	0.0114664	0.0103992	0.00728933	Novel	1	1	Activated
CHD1	0.0172423	0.0214408	0.00880158	0.0105582	0.00810213	0.012329	0.00937861	0.00785409	Novel	0.615548	1	Activated
SRF	0.0208043	0.0252549	0.0109513	0.0138972	0.01074	0.0153493	0.0121701	0.0117934	Activate_TFs	0.724402	1	Activated
MECP2	0.0640866	0.07129	0.0150529	0.0251657	0.0183227	0.0185509	0.0140488	0.00981088	Novel	1	1	Activated
RFXAP	0.024188	0.0251546	0.0160073	0.0172482	0.0164926	0.0195591	0.0153578	0.0158927	Novel	0.942949	0.987723	Activated
ATF6B	0.0176076	0.0193689	0.00906663	0.00931787	0.00897717	0.0110375	0.00939166	0.00880632	Activate_TFs	0.911999	0.998698	Activated
CEBPZ	0.0144623	0.0152753	0.00574349	0.00604959	0.0048609	0.00792986	0.00601477	0.00600972	Novel	0.838692	1	Activated

## Sheet: Nagy ND
Table.S7. Details of the transcription factor lists and identified from the SCENIC algorithm with pathway enrichment analysis.
Separated-Nagy et al. (ND)	SCENIC calculated transcripton regulon activities in different sub-cluaters/layers
Transcription factors	L5/6	L4/5	ES	L2/3	LS	L5	L4/6	L6	TFStatusIdnetifiedByIntegratedDatasets	PvalueForUpMarkers	PvalueForDownMarkers	TFStatusInCurrentDataset			Pathway enrichment among activated transcription factors
NFAT5	0.209273	0.183111	0.110617	0.287318	0.0610013	0.20184	0.296549	0.27323	Novel	1	2.96611e-05	Inhibited			Index	Name	P-value
PUM3	0.0799143	0.0969898	0.0846569	0.203265	0.0301558	0.133588	0.148583	0.157221	Novel	1	2.34858e-09	Inhibited			1	TNF-alpha Signaling via NF-kB	3.102e-10
POU2F1	0.057993	0.0439011	0.038176	0.0466285	0.0155677	0.0615086	0.0636731	0.0653585	Novel	1	0.0118485	Inhibited			2	Hypoxia	6.162e-05
RUNX1	0.0282107	0.026263	0.0260495	0.0299805	0.0149597	0.0332476	0.0281113	0.0397	Activate_TFs	0.979875	0.885388	Inhibited			3	IL-6/JAK/STAT3 Signaling	0.009235
ELF2	0.0408565	0.037105	0.0314775	0.0409846	0.0227595	0.0363444	0.0392971	0.0441079	Inhibite_TFs	0.99856	0.00433905	Inhibited			4	G2-M Checkpoint	0.01748
RFX4	0.023388	0.0162141	0.0148837	0.0232531	0.00832836	0.0188987	0.0211011	0.0238284	Novel	1	0.862032	Inhibited			5	p53 Pathway	0.01748
CUX1	0.0827631	0.0873777	0.0561764	0.0994862	0.0311516	0.0815025	0.095194	0.12656	Inhibite_TFs	0.999275	0	Inhibited			6	Wnt-beta Catenin Signaling	0.01836
CHD2	0.0471343	0.0424491	0.0397069	0.0512439	0.0309215	0.0456844	0.0505928	0.05706	Inhibite_TFs	0.941436	0.0018176	Inhibited			7	Unfolded Protein Response	0.01861
SOX5	0.241689	0.169548	0.103482	0.244829	0.0321136	0.219002	0.293037	0.416757	Inhibite_TFs	1	0	Inhibited			8	TGF-beta Signaling	0.02938
BDP1	0.026915	0.0205985	0.0132216	0.023186	0.00820955	0.0227299	0.0257323	0.0194814	Inhibite_TFs	1	0.506486	Inhibited			9	UV Response Up	0.04378
NFIB	0.144892	0.115036	0.0752305	0.136081	0.045341	0.125385	0.125939	0.119478	Novel	0.993158	0	Inhibited			10	Cholesterol Homeostasis	0.05205
NPAS2	0.0760097	0.0799111	0.0469614	0.084886	0.0227921	0.0719465	0.085176	0.0800072	Novel	0.998603	0	Inhibited
NRF1	0.0659934	0.0681413	0.0473819	0.0707513	0.0267896	0.0674213	0.0720461	0.0685985	Inhibite_TFs	0.999996	0	Inhibited
KMT2A	0.104466	0.098274	0.0620681	0.103985	0.0409924	0.103099	0.104405	0.101619	Novel	0.992627	0	Inhibited			Pathway enrichment among inhibited transcription factors
NR3C1	0.0630598	0.0612372	0.0435213	0.0650729	0.0332337	0.061166	0.0643241	0.0666278	Inhibite_TFs	1	0	Inhibited			Index	Name	P-value
TFCP2	0.0718366	0.0846878	0.045157	0.0848707	0.0281665	0.0762562	0.0778183	0.082806	Novel	1	1	Inhibited			1	UV Response Dn	0.01355
ZEB1	0.104587	0.11462	0.0577841	0.105156	0.037307	0.105375	0.10922	0.0984153	Inhibite_TFs	0.999734	0	Inhibited			2	Pperoxisome	0.05016
ARNT2	0.0423737	0.0494352	0.0346247	0.0556607	0.0417621	0.0404602	0.0510163	0.0467373	Novel	0.622738	0.41601	Inhibited			3	Notch Signaling	0.1048
PKNOX2	0.0617437	0.110905	0.062931	0.104194	0.0351296	0.0659595	0.0909922	0.0870491	Novel	1	3.76122e-10	Inhibited			4	Wnt-beta Catenin Signaling	0.1352
NFIA	0.114753	0.0341126	0.0403577	0.0661563	0.0225168	0.0483361	0.0864637	0.0879608	Novel	1	0.0344602	Inhibited			5	IL-2/STAT5 Signaling	0.1504
SOX6	0.0542179	0.0249542	0.0300342	0.0265778	0.0157874	0.0209846	0.0253434	0.0365525	Novel	1	1	Inhibited			6	TNF-alpha Signaling via NF-kB	0.1516
TEAD1	0.015714	0.00941818	0.00744341	0.00760252	0.0043943	0.00424463	0.00927191	0.0158979	Inhibite_TFs	1	1	Inhibited			7	Androgen Response	0.2928
CREB1	0.0415276	0.0377755	0.034003	0.0388254	0.0373089	0.0367092	0.0373285	0.0371959	Activate_TFs	0.852295	0.834371	Inhibited			8	Unfolded Protein Response	0.324
JUND	0.0623825	0.0653123	0.0469701	0.0658385	0.0626814	0.061027	0.0670862	0.0630169	Inhibite_TFs	0	0	Inhibited			9	DNA Repair	0.4057
RFX1	0.0449294	0.0437992	0.0361289	0.0426764	0.0445887	0.0450312	0.0458629	0.0456342	Activate_TFs	0.137769	0.389207	Inhibited			10	Xenobiotic Metabolism	0.5008
TCF12	0.0429168	0.0229382	0.0244986	0.0393571	0.00825289	0.0701596	0.0425523	0.0184786	Inhibite_TFs	1	0.245969	Inhibited
MRPS25	0.0348529	0.021162	0.0193898	0.0272828	0.0154216	0.0407231	0.0213414	0.0132201	Novel	1	1	Inhibited
PBX1	0.134584	0.0827131	0.075069	0.119482	0.0411712	0.156922	0.0646753	0.0802588	Inhibite_TFs	1	0.0777732	Inhibited
GLIS1	0.0302585	0.028712	0.0305608	0.0270904	0.0188438	0.0319141	0.0305037	0.0257	Novel	1	0.354906	Inhibited
ETV6	0.0360801	0.0272379	0.0304213	0.0322709	0.0200675	0.0305857	0.0315568	0.0304518	Novel	0.999986	0.000945019	Inhibited
RFX7	0.03852	0.0226189	0.024586	0.023369	0.00835473	0.0254597	0.0267591	0.020406	Novel	1	0.245969	Inhibited
KLF12	0.0321116	0.0458371	0.0216619	0.0245201	0.0123047	0.0305901	0.025811	0.0146575	Novel	1	0.195188	Inhibited
BCL11A	0.125854	0.0967473	0.0471016	0.0801529	0.0340471	0.11346	0.0992681	0.0875016	Inhibite_TFs	1	1.99787e-07	Inhibited
FOXP2	0.128112	0.11259	0.0498718	0.0662216	0.0301422	0.147786	0.0885987	0.0904599	Inhibite_TFs	1	0	Inhibited
ZNF583	0.0175611	0.0178373	0.0113431	0.0239941	0.00549394	0.00464477	0.0200673	0.00594909	Novel	1	1	Inhibited
MLXIP	0.0287091	0.0287366	0.0303151	0.0320428	0.0223862	0.0274602	0.0315928	0.0250787	Novel	0.857851	0.108356	Inhibited
MLXIPL	0.0500139	0.0517967	0.0537427	0.0561151	0.0453507	0.0497663	0.0536716	0.0461744	Activate_TFs	0.180516	0.015339	Inhibited
EP300	0.0269583	0.0270739	0.0250401	0.0298554	0.0156776	0.0260575	0.0293777	0.0299866	Novel	0.993754	0.513362	Inhibited
MAX	0.027005	0.0283921	0.028283	0.0293979	0.0231888	0.0285546	0.0289574	0.0311908	Activate_TFs	0.438053	0.962497	Inhibited
ESR2	0.00916833	0.0105305	0.0117399	0.0114585	0.00336438	0.0110887	0.0100668	0.0111343	Novel	1	1	Inhibited
SMARCC1	0.0379236	0.0464266	0.0460658	0.0469196	0.0258082	0.0409172	0.0478627	0.0401384	Novel	1	0.291151	Inhibited
TAF1	0.0338042	0.0312792	0.0368178	0.0345399	0.0271505	0.0339091	0.0322887	0.03395	Activate_TFs	0.895193	0.0405461	Inhibited
BRF1	0.0382431	0.0379094	0.0388888	0.0399885	0.0317828	0.0347314	0.0378736	0.0369855	Activate_TFs	0.947597	0.591006	Inhibited
SP4	0.020835	0.0209396	0.0255172	0.0217337	0.0169662	0.0186322	0.0221843	0.022269	Activate_TFs	1	0.805318	Inhibited
ZNF562	0.0227575	0.0269012	0.026403	0.0217523	0.0307019	0.0377383	0.0249948	0.0246129	Novel	0.568644	0.841008	Inhibited
GTF3C2	0.005618	0.00620702	0.00842363	0.00593396	0.00680013	0.0104639	0.00479845	0.00521671	Novel	1	1	Inhibited
PPARD	0.0239871	0.0215517	0.0342014	0.0199449	0.0276496	0.0597033	0.018754	0.022165	Activate_TFs	1	1	Inhibited
RARB	0.0167907	0.0507377	0.0208817	0.0193632	0.0125174	0.113902	0.0242267	0.0270546	Inhibite_TFs	1	0.145392	Inhibited
ETV5	0.0498705	0.0419749	0.0349887	0.0395025	0.0449986	0.0630441	0.0349758	0.035109	Inhibite_TFs	0.257222	0.918016	Inhibited
PLAGL1	0.0355529	0.019847	0.0280633	0.00705015	0.0192064	0.0700359	0.0115409	0.0158416	Novel	1	1	Inhibited
KDM5A	0.0306004	0.0231319	0.0261445	0.0202212	0.0270002	0.0272126	0.0265956	0.0274784	Inhibite_TFs	0.84263	0.829327	Inhibited
NR2C1	0.0200663	0.0170789	0.0293829	0.0170347	0.0193497	0.026957	0.0196583	0.0249792	Activate_TFs	1	0.706222	Inhibited
ZNF362	0.0278424	0.0279312	0.0285885	0.0261976	0.028137	0.0315037	0.0257468	0.0306667	Novel	0.868395	0.851508	Inhibited
FOXJ3	0.0311843	0.0242075	0.0326992	0.027758	0.0280405	0.0241474	0.0289732	0.0282285	Novel	1	1	Inhibited
RCOR1	0.0124213	0.00928938	0.0135518	0.0103121	0.00978999	0.0108897	0.0100606	0.0110714	Activate_TFs	1	0.994236	Inhibited
SNAPC4	0.00936519	0.00788054	0.0224653	0.00842347	0.00678259	0.00933799	0.00869261	0.00713519	Novel	1	1	Inhibited
ARNT	0.0243304	0.0234003	0.0311643	0.0274749	0.0198384	0.0236279	0.0243326	0.030471	Inhibite_TFs	1	0.163187	Inhibited
NFE2L2	0.0171564	0.0167249	0.0282186	0.0232955	0.0174655	0.0216047	0.0199144	0.0259638	Activate_TFs	1	1	Inhibited
MTA3	0.0108847	0.00915009	0.0204454	0.013195	0.0104968	0.00812951	0.0111551	0.0155404	Novel	1	1	Inhibited
ZNF76	0.0386647	0.0370307	0.0527202	0.0420118	0.0439082	0.02951	0.0424924	0.0542774	Activate_TFs	1	1	Inhibited
ELK4	0.0224455	0.0217313	0.0223156	0.0247502	0.0248322	0.0208747	0.0220739	0.0300456	Activate_TFs	0.0575223	0.972913	Inhibited
MECOM	0.0193659	0.0228068	0.0181903	0.0268668	0.0377882	0.021539	0.0158678	0.0555619	Novel	0.203437	1	Inhibited
ATF6	0.025198	0.0231947	0.0261112	0.0231988	0.0268552	0.0234989	0.023822	0.0287422	Inhibite_TFs	0.85751	0.879695	Inhibited
HSF1	0.00411808	0.0015892	0.00350718	0.0016882	0.00458286	0.00250055	0.00227846	0.0123325	Novel	1	1	Inhibited
FOXN2	0.0233895	0.0322695	0.0391574	0.0554032	0.0250208	0.0249406	0.0419226	0.0503988	Inhibite_TFs	0.685818	0.0956448	Inhibited
POU2F2	0.0127237	0.00624569	0.0167154	0.0257929	0.00690037	0.00860296	0.0224624	0.0265929	Inhibite_TFs	1	0.389943	Inhibited
CREB5	0.0504689	0.0532593	0.0353545	0.0426772	0.0174168	0.0440518	0.0430675	0.0955703	Inhibite_TFs	1	0.0218008	Inhibited
TRPS1	0.0429344	0.0389143	0.0423921	0.0603947	0.0191775	0.0268852	0.0573911	0.132687	Novel	1	0.0173732	Inhibited
ZFHX2	0.0616641	0.0538674	0.059494	0.066365	0.0289689	0.0544595	0.076351	0.127572	Activate_TFs	1	0.0121435	Inhibited
FOSL2	0.023829	0.0269525	0.0324549	0.0265555	0.0393123	0.0284021	0.0261981	0.0239559	Activate_TFs	0.179942	0.97495	Activated
KLF16	0.0222148	0.0214245	0.0289795	0.0199605	0.037658	0.02143	0.0207947	0.0186413	Activate_TFs	0.000632533	1	Activated
PHF8	0.0191706	0.0179065	0.0224301	0.0168724	0.0260642	0.0183973	0.017384	0.0161512	Activate_TFs	0.0915785	0.990089	Activated
GABPB1	0.0228245	0.02385	0.0271496	0.0221719	0.0324783	0.0223473	0.0211008	0.0214539	Activate_TFs	0.452549	0.989708	Activated
KLF6	0.0218709	0.0228446	0.0253765	0.0200522	0.0348132	0.0220049	0.0208046	0.0192096	Activate_TFs	0.0242144	0.998925	Activated
ZMAT2	0.023257	0.0249346	0.0343655	0.0218819	0.0623906	0.022273	0.022269	0.0175251	Novel	1.23484e-08	1	Activated
NFYB	0.00935128	0.00934458	0.015611	0.00882553	0.0176398	0.0119554	0.00776619	0.0089322	Activate_TFs	0.599597	1	Activated
FOXK1	0.00459904	0.00539767	0.0140248	0.00490805	0.0159915	0.005437	0.00490107	0.00348238	Novel	1	1	Activated
MEF2D	0.00650953	0.0062471	0.0103669	0.00595608	0.0112319	0.00612167	0.00568153	0.00499691	Activate_TFs	1	1	Activated
STAT5B	0.0117931	0.0130326	0.0174619	0.0119069	0.0201588	0.0127089	0.0110487	0.0128844	Activate_TFs	0.668512	0.999943	Activated
SP3	0.0198384	0.0176171	0.0277121	0.0175749	0.0316386	0.0194554	0.0181269	0.0187617	Activate_TFs	0.0464947	1	Activated
E2F4	0.016831	0.0170087	0.0256654	0.0166091	0.0282101	0.0166362	0.0158328	0.0166019	Activate_TFs	0.62586	0.997785	Activated
NR2F6	0.0118181	0.012965	0.0306881	0.0100143	0.0378674	0.0136771	0.00975951	0.010028	Activate_TFs	0.210243	1	Activated
LHX2	0.0124479	0.0159438	0.01983	0.0135891	0.0229021	0.0126073	0.011265	0.00912572	Inhibite_TFs	0.602557	1	Activated
TCF7L2	0.00752603	0.0122514	0.0205671	0.00732616	0.0192106	0.00898534	0.00691312	0.0067458	Activate_TFs	1	1	Activated
ZFX	0.0180122	0.0152313	0.018463	0.0166801	0.0171158	0.0133904	0.0143904	0.0131216	Novel	1	1	Activated
ZNF83	0.0108816	0.00748826	0.0135914	0.00514167	0.0109171	0.00748093	0.00529691	0.00468484	Novel	1	1	Activated
NR2C2	0.0143949	0.00830004	0.0156495	0.00904327	0.015172	0.00868343	0.00748271	0.00774679	Activate_TFs	0.561616	1	Activated
PKNOX1	0.0115092	0.00786415	0.0147232	0.00631196	0.0135835	0.0074259	0.00623798	0.00769365	Novel	0.545204	1	Activated
CHD1	0.0115727	0.0116347	0.0144612	0.0105696	0.0115339	0.0116652	0.00858353	0.00942914	Novel	1	1	Activated
HES4	0.0417933	0.0446695	0.0662994	0.0412541	0.0493237	0.0514793	0.0418152	0.0397366	Inhibite_TFs	1	1	Activated
PPARG	0.00897352	0.00652938	0.0161599	0.00907125	0.0104306	0.011624	0.00491823	0.0069467	Inhibite_TFs	1	0.719764	Activated
FOXO3	0.0219331	0.023753	0.0228169	0.0225481	0.0217298	0.0219778	0.0207739	0.018725	Inhibite_TFs	0.998637	0.998179	Activated
SMAD2	0.0316531	0.0303329	0.032357	0.0220978	0.0295449	0.028771	0.0236812	0.0181915	Activate_TFs	1	1	Activated
HSF2	0.0364867	0.0339024	0.039955	0.031873	0.0425246	0.0274101	0.0270916	0.0356642	Novel	1	1	Activated
ZNF420	0.0107058	0.00938962	0.0131354	0.00761154	0.0130996	0.00881452	0.00561605	0.0102247	Novel	1	1	Activated
MXI1	0.0194928	0.0197331	0.0249557	0.0170084	0.0248501	0.0193363	0.0179415	0.0227762	Activate_TFs	0.960667	0.998959	Activated
TFDP1	0.0101987	0.0112811	0.0179309	0.00975943	0.0146262	0.012706	0.00837277	0.0152816	Activate_TFs	1	0.684676	Activated
SETDB1	0.0186997	0.0157977	0.0308117	0.0169886	0.0228608	0.0189958	0.0155273	0.0188143	Activate_TFs	0.986811	0.984052	Activated
STAT3	0.00894078	0.00791984	0.0142229	0.00915514	0.0109625	0.00905084	0.00822482	0.0103006	Novel	1	1	Activated
CEBPZ	0.0176755	0.0192844	0.0241706	0.019082	0.0213125	0.0172174	0.017847	0.0197716	Novel	1	1	Activated
ARID3A	0.0155454	0.0167382	0.027482	0.0162542	0.0205901	0.0158203	0.0131811	0.0167981	Activate_TFs	0.905656	0.726499	Activated
CPSF4	0.0303366	0.0363696	0.0742852	0.0341064	0.0553706	0.0323529	0.032378	0.0332068	Novel	1	1	Activated
ZNF658	0.00203242	0.00185711	0.0189566	0.0023751	0.00982034	0.00141171	0.00194156	0.00222785	Novel	1	1	Activated
RLF	0.00858121	0.00655379	0.0146355	0.00461105	0.0127093	0.00750089	0.00453193	0.00368305	Novel	1	1	Activated
JDP2	0.00758734	0.00404805	0.0140844	0.00489603	0.011187	0.00535575	0.00377485	0.00381248	Activate_TFs	1	1	Activated
SMARCC2	0.0159987	0.0117805	0.0283847	0.0126063	0.0257492	0.0155446	0.0129429	0.0108172	Activate_TFs	0.715344	1	Activated
ZNF84	0.014497	0.0142693	0.0312881	0.0109117	0.0328882	0.0128671	0.0131018	0.014412	Novel	1	1	Activated
RBPJ	0.00432788	0.00200957	0.0177346	0.00212206	0.0154985	0.00320761	0.00232117	0.00267952	Novel	1	1	Activated
SNAI3	0.00612122	0.0054572	0.0155247	0.00523558	0.0149531	0.00609328	0.00528402	0.00650681	Novel	1	1	Activated
RXRB	0.0146003	0.0138588	0.0253066	0.0127366	0.0221724	0.0133727	0.0128251	0.0116864	Activate_TFs	0.595938	1	Activated
ZNF189	0.0083376	0.0067164	0.0296467	0.00531476	0.0257031	0.00655923	0.00786393	0.004604	Novel	1	1	Activated
ZSCAN5A	0.00401387	0.00298103	0.0304892	0.00162652	0.0260855	0.00400155	0.00400929	0.00185214	Novel	1	1	Activated
ASCC1	0.0150689	0.0154247	0.069397	0.0159403	0.0538052	0.0164912	0.0163787	0.0121831	Novel	1	1	Activated
ZNF451	0.0089493	0.00609873	0.0493175	0.00456438	0.0381836	0.0119376	0.00760331	0.00654249	Novel	1	1	Activated
CERS5	0.00632227	0.00240666	0.0778701	0.000215685	0.0580271	0.0072593	0.00652567	0.00288587	Novel	1	1	Activated
SIRT6	0.00471182	0.0037427	0.0227233	0.00294943	0.0183916	0.0043954	0.00475244	0.00359832	Novel	1	1	Activated
SMAD1	0.00870894	0.00735648	0.0184284	0.00791719	0.0143362	0.00781153	0.00682353	0.00685256	Novel	1	1	Activated
ZNF568	0.0135162	0.0114624	0.0283166	0.012464	0.0210219	0.0124241	0.0107122	0.0119897	Novel	0.661685	1	Activated
ATF6B	0.0205751	0.0191614	0.0382766	0.0180868	0.031554	0.0196698	0.0184542	0.0194795	Activate_TFs	1	1	Activated
UBP1	0.0092988	0.00857088	0.0286704	0.0070539	0.0210448	0.0104599	0.00801166	0.00732173	Novel	1	1	Activated
MGA	0.00369493	0.00250351	0.0293536	0.00172089	0.0206273	0.00461073	0.00360283	0.00217415	Activate_TFs	1	1	Activated
RB1	0.00493379	0.00467996	0.0207477	0.00401017	0.0144599	0.00581169	0.0047587	0.00459103	Novel	1	1	Activated
GTPBP6	0.0186299	0.0182245	0.0170167	0.016831	0.0289575	0.0201971	0.0163541	0.022422	Novel	1	1	Activated
NR2F1	0.0342981	0.041588	0.0380749	0.0295552	0.0570426	0.0382159	0.0303432	0.0543224	Activate_TFs	0.0861979	1	Activated
ARNTL	0.0196976	0.0232202	0.0234468	0.0220736	0.0277527	0.0218449	0.0190922	0.0216561	Novel	0.77186	1	Activated
TBPL1	0.0225194	0.0242233	0.0227028	0.0243902	0.0265472	0.0226031	0.0224978	0.0234982	Novel	0.798526	1	Activated
DNMT3A	0.0192671	0.0217959	0.0187748	0.0255067	0.0248453	0.0259943	0.0249275	0.0281496	Novel	1	1	Activated
BCLAF1	0.0351697	0.0358749	0.0299177	0.0367519	0.0388471	0.0351875	0.0359674	0.0367529	Activate_TFs	0.39193	0.977981	Activated
MXD1	0.0258198	0.0297809	0.0198745	0.0260089	0.0411447	0.025339	0.0269558	0.0306766	Activate_TFs	0.10067	1	Activated
CEBPD	0.0337449	0.0337645	0.0298967	0.0400614	0.0461396	0.0317305	0.0370888	0.0326825	Activate_TFs	0.0155168	0.605093	Activated
CREM	0.0264204	0.026034	0.0252234	0.0311785	0.035539	0.029502	0.0277584	0.0310123	Novel	0.0601168	0.8744	Activated
SREBF2	0.0459049	0.0464485	0.0406824	0.0443712	0.055185	0.0468035	0.0466242	0.0427908	Activate_TFs	0.000196099	0.999556	Activated
TEF	0.0616778	0.06499	0.0557259	0.063867	0.0783163	0.0603927	0.0644729	0.0573095	Activate_TFs	5.92282e-12	0.725409	Activated
RAD21	0.0534073	0.0667182	0.0445878	0.0542557	0.0939806	0.0555344	0.0559825	0.0464627	Activate_TFs	0	0.821805	Activated
HLF	0.0517393	0.0574596	0.038601	0.0529923	0.0839317	0.0520212	0.0533449	0.0489929	Activate_TFs	0	0.999846	Activated
EGR1	0.0527185	0.0611078	0.0426485	0.0541434	0.0880907	0.0518699	0.0564332	0.0455703	Activate_TFs	0	0.696552	Activated
KLF9	0.0515045	0.0576074	0.0332157	0.0496147	0.0929157	0.047746	0.0515443	0.0401316	Activate_TFs	8.3511e-13	1	Activated
NFE2L1	0.054292	0.059618	0.0442272	0.0550621	0.0878254	0.0545069	0.0570467	0.049328	Novel	0	0.194546	Activated
CEBPB	0.0323245	0.0333534	0.0311642	0.0339975	0.0485347	0.0299243	0.0328211	0.0299639	Activate_TFs	5.73295e-06	0.915229	Activated
EGR3	0.0394993	0.0451309	0.035748	0.0430599	0.0749123	0.0369574	0.0448968	0.0410937	Activate_TFs	0	0.992978	Activated
JUN	0.0316019	0.0350677	0.0307216	0.0362785	0.0555864	0.0295827	0.0344311	0.0328895	Activate_TFs	0	0.786873	Activated
ATF4	0.0578005	0.0607959	0.0490594	0.0560928	0.0913619	0.0542835	0.0587518	0.050431	Activate_TFs	0	0.561388	Activated
TAF7	0.0353552	0.0425041	0.0310111	0.0354763	0.080751	0.0363196	0.037989	0.0328618	Activate_TFs	0	1	Activated
BHLHE40	0.045736	0.0521869	0.0412112	0.0464945	0.0841701	0.0444065	0.0471314	0.0415676	Activate_TFs	0	0.982221	Activated
ETS2	0.0431694	0.048826	0.0374594	0.043363	0.0824829	0.0420621	0.0456274	0.0365702	Activate_TFs	0	1	Activated
PSMD12	0.0260613	0.0309672	0.0244384	0.0276633	0.0638809	0.029727	0.0275754	0.0253972	Novel	0	1	Activated
YY1	0.0424839	0.0439871	0.0408639	0.0406597	0.0591221	0.0422593	0.0410796	0.040386	Activate_TFs	1.2745e-05	0.995235	Activated
THRA	0.031699	0.0311942	0.0405019	0.0402894	0.0664174	0.0253034	0.0415107	0.0247316	Activate_TFs	0.00072387	1	Activated
UBTF	0.0562995	0.0520008	0.0720079	0.0536531	0.0853328	0.0392256	0.0556338	0.0366642	Activate_TFs	1	1	Activated
ESRRA	0.0411833	0.0382686	0.0326335	0.0393632	0.0563285	0.028437	0.0391067	0.0363935	Activate_TFs	0.000541879	1	Activated
CTCF	0.0195873	0.0211926	0.0203332	0.0199784	0.0256319	0.0169799	0.0197508	0.0196249	Activate_TFs	0.810876	0.92153	Activated
GTF2A1	0.00247583	0.00314954	0.00400014	0.00320925	0.0108243	0.000901381	0.00380518	0.00259476	Novel	1	1	Activated
NONO	0.0381448	0.0479336	0.038495	0.0349208	0.0610893	0.0372623	0.033875	0.0232078	Novel	0.178668	1	Activated
MECP2	0.0385612	0.0391345	0.0398514	0.0380385	0.0453622	0.0428667	0.0363791	0.0330371	Novel	0.0179401	0.937757	Activated
RBBP5	0.0251563	0.0263537	0.0251612	0.0226998	0.0324409	0.0268905	0.0213378	0.0219244	Activate_TFs	0.190216	1	Activated
DEAF1	0.0429395	0.0368722	0.0375754	0.0345561	0.0504142	0.0387682	0.0353782	0.0376637	Activate_TFs	0.000135508	0.951729	Activated
KLF13	0.0258758	0.0208427	0.0215928	0.0161946	0.04367	0.0219516	0.0205633	0.0155966	Novel	0.178668	1	Activated
SIN3A	0.0271789	0.0267343	0.0253918	0.0236443	0.0375815	0.026765	0.0243328	0.0211831	Activate_TFs	0.000841869	0.999489	Activated
ATF2	0.0280563	0.026341	0.0287049	0.0280093	0.0372425	0.0276919	0.0259541	0.0258137	Inhibite_TFs	0.902606	1	Activated
HDAC2	0.0216198	0.0231803	0.0252108	0.0210787	0.0417206	0.0244485	0.0207961	0.0198589	Activate_TFs	2.28028e-07	0.999985	Activated
NFIC	0.0265826	0.029307	0.032203	0.0269591	0.066073	0.0267443	0.0252661	0.0254775	Activate_TFs	3.12458e-08	1	Activated
JUNB	0.0269424	0.0297297	0.0319512	0.026608	0.0495328	0.02791	0.0282513	0.0261751	Novel	1.04353e-06	0.987129	Activated
POLR2A	0.0258628	0.0277911	0.0300115	0.0233623	0.0516339	0.0256377	0.0251599	0.0212289	Activate_TFs	0	0.99999	Activated
STAT1	0.0243408	0.0272684	0.0283281	0.0238724	0.0466614	0.0250038	0.0241712	0.0218631	Activate_TFs	4.00609e-07	0.977755	Activated
NFIX	0.0498368	0.049962	0.0444065	0.045976	0.066361	0.0411371	0.0464388	0.0360787	Novel	0.0578367	1	Activated
ZBTB7A	0.0406183	0.040197	0.0415512	0.038344	0.051079	0.0373194	0.0400489	0.0363563	Activate_TFs	0	0.997929	Activated
MAZ	0.0435789	0.0459962	0.0412598	0.0403153	0.0777618	0.0392091	0.0442959	0.0334444	Activate_TFs	0	0.999998	Activated
USF2	0.0430038	0.042217	0.0434398	0.042148	0.0610412	0.0406009	0.0424741	0.0384406	Activate_TFs	6.97012e-08	0.974504	Activated

## Sheet: Yang ND
Table.S7. Details of the transcription factor lists and identified from the SCENIC algorithm with pathway enrichment analysis.
Separated-Yang et al. (ND)	SCENIC calculated transcripton regulon activities in different sub-cluaters/layers
Transcription factors	ES	L2/3	L4/5	L4/6	L5/6	L6	LS	TFStatusIdnetifiedByIntegratedDatasets	PvalueForUpMarkers	PvalueForDownMarkers	TFStatusInCurrentDataset			Pathway enrichment among activated transcription factors
E2F3	0.0157677	0.00928092	0.00629237	0.00672614	0.00689992	0.00798725	0.0177215	Inhibite_TFs	1	1	Activated			Index	Name	P-value
ZFY	0.0256581	0.0212397	0.0214663	0.0196264	0.0208445	0.0223126	0.0276061	Novel	0.760037	0.928874	Activated			1	TNF-alpha Signaling via NF-kB	1.674e-10
BRF1	0.0193741	0.0103946	0.0112043	0.010252	0.0113487	0.00965936	0.0228969	Activate_TFs	0.197372	1	Activated			2	Hypoxia	4.419e-05
GABPB1	0.0121421	0.00539053	0.00638335	0.00536612	0.00576966	0.00443243	0.0138457	Activate_TFs	0.983368	1	Activated			3	G2-M Checkpoint	0.002543
ARNT	0.00875961	0.0014231	0.00160524	0.00157016	0.00213348	0.00104089	0.0100282	Inhibite_TFs	1	1	Activated			4	UV Response Dn	0.004763
ATF7	0.0155235	0.008164	0.00875812	0.00916675	0.00924896	0.00816838	0.0170984	Novel	0.990331	1	Activated			5	IL-2/STAT5 Signaling	0.01447
IKZF2	0.0190403	0.000199099	0.000883291	0.00032474	0.0014332	0.000962622	0.0214064	Inhibite_TFs	1	1	Activated			6	Inflammatory Response	0.01471
TFDP1	0.0212657	0.0047765	0.00705182	0.00590365	0.00627855	0.00584482	0.0213965	Activate_TFs	1	1	Activated			7	Wnt-beta Catenin Signaling	0.01666
ATF6B	0.0210715	0.0134791	0.013526	0.0125699	0.0157041	0.0137739	0.0232226	Activate_TFs	0.669928	1	Activated			8	IL-6/JAK/STAT3 Signaling	0.06322
HDAC2	0.0178886	0.0108848	0.0111608	0.0102451	0.0121104	0.0106934	0.0217169	Activate_TFs	0.553122	0.998925	Activated			9	Interferon Gamma Response	0.06825
ZNF709	0.00957034	0.0022394	0.00304457	0.00196068	0.00393245	0.00216748	0.0127615	Novel	1	1	Activated			10	E2F Targets	0.06825
NFE2L2	0.0109472	0.00374002	0.00287392	0.00317356	0.00259932	0.00340439	0.0146427	Activate_TFs	0.653237	1	Activated
SP3	0.0142199	0.0073265	0.00804194	0.00727123	0.00722641	0.00800794	0.0177453	Activate_TFs	0.531871	0.995976	Activated			Pathway enrichment among inhibited transcription factors
CLOCK	0.0119159	0.00360147	0.00498302	0.00401549	0.00466179	0.00492978	0.0157473	Activate_TFs	0.808237	1	Activated			Index	Name	P-value
PPARD	0.0131252	0.00346459	0.00483855	0.00369067	0.00461691	0.00424456	0.0172855	Activate_TFs	0.791465	1	Activated			1	UV Response Dn	0.01463
SMC3	0.0100276	0.00226701	0.00308929	0.00230447	0.00343477	0.00265014	0.0133812	Novel	0.768607	1	Activated			2	Interferon Gamma Response	0.03428
POU6F1	0.0349146	0.0275608	0.0299348	0.0276312	0.0232776	0.0189704	0.0600485	Activate_TFs	0.0441944	1	Activated			3	Notch Signaling	0.1076
RXRB	0.0292882	0.0244284	0.0293448	0.0235911	0.0225738	0.0140054	0.0408941	Activate_TFs	0.533855	1	Activated			4	Hypoxia	0.1586
FOXJ3	0.0106538	0.00463204	0.00494503	0.00584558	0.00782553	0.00690658	0.01319	Novel	0.821935	1	Activated			5	G2-M Checkpoint	0.1586
MAX	0.0255219	0.0182665	0.0183828	0.0184358	0.0198569	0.0208987	0.0274744	Activate_TFs	0.361803	0.999987	Activated			6	Complement	0.1586
CTCF	0.0226072	0.0133297	0.0138018	0.0156817	0.0192566	0.0136957	0.0262644	Activate_TFs	0.0583684	1	Activated			7	TGF-beta Signaling	0.1749
KLF7	0.00889395	0.00320213	0.0047527	0.00442962	0.00711718	0.00379124	0.0120503	Activate_TFs	0.817481	1	Activated			8	Cholesterol Homeostasis	0.2318
STAT5B	0.0355284	0.0274957	0.0302391	0.0270192	0.0342471	0.027541	0.048059	Activate_TFs	0.00723135	1	Activated			9	IL-6/JAK/STAT3 Signaling	0.2666
HSF2	0.0091135	0.00355476	0.00437995	0.00369903	0.00630815	0.00386527	0.0134254	Novel	1	1	Activated			10	Interferon Alpha Response	0.2923
ZNF667	0.0307249	0.0189498	0.0196022	0.0186851	0.0242719	0.0217855	0.0412395	Activate_TFs	0.352663	1	Activated
NFKB1	0.0104006	0.00774091	0.00961265	0.00853765	0.0083663	0.00803622	0.0131036	Activate_TFs	1	1	Activated
JDP2	0.0249559	0.0158631	0.0209481	0.0155453	0.0193159	0.0126627	0.0346251	Activate_TFs	0.000138105	0.976673	Activated
CCNT2	0.0103828	0.00360979	0.00561071	0.00322435	0.00530929	0.00301938	0.0171299	Novel	1	1	Activated
TERF1	0.016894	0.00472678	0.00992391	0.00576952	0.00964071	0.00658084	0.0248192	Novel	1	1	Activated
MLXIPL	0.0266758	0.0161378	0.0176767	0.0178253	0.018154	0.0185916	0.0335411	Activate_TFs	0.22716	1	Activated
ZNF155	0.00866357	0.00159495	0.00207223	0.0018606	0.00202443	0.00199985	0.0161889	Novel	1	1	Activated
ELK4	0.0263279	0.0170233	0.0165959	0.0163659	0.0189306	0.0183417	0.0376257	Activate_TFs	0.054285	0.999795	Activated
SP4	0.0234079	0.0164193	0.016446	0.0161511	0.0169278	0.0181001	0.0297359	Activate_TFs	0.473326	1	Activated
ZSCAN18	0.0550732	0.0233391	0.0224765	0.0279262	0.0269156	0.0203014	0.0760956	Novel	0.137234	1	Activated
AGGF1	0.0125438	0.00149408	0.00373641	0.00425476	0.00551542	0.00269301	0.023778	Novel	1	1	Activated
FOXK1	0.013525	0.00438908	0.00570205	0.0057176	0.00668453	0.00316148	0.0212642	Novel	1	1	Activated
SIN3A	0.0154409	0.0143481	0.012939	0.0132971	0.0155631	0.0120641	0.0168595	Activate_TFs	0.988248	0.859884	Activated
ZNF713	0.0212709	0.0131125	0.0124518	0.0130627	0.0168531	0.00934976	0.0150058	Novel	1	1	Activated
ZNF235	0.0178295	0.0132148	0.0171376	0.0133636	0.015385	0.0126501	0.0189406	Novel	0.979875	0.976112	Activated
ZNF362	0.0218563	0.0137612	0.0184237	0.0138262	0.0156767	0.0134781	0.019521	Novel	1	0.756768	Activated
MIOS	0.0286998	0.0155336	0.0180742	0.0141548	0.0196043	0.0172264	0.0225416	Novel	1	1	Activated
ZNF251	0.0100546	0.00194337	0.00567933	0.00381882	0.00651373	0.00527079	0.00752715	Novel	1	1	Activated
BBX	0.0150121	0.00133403	0.00295966	0.00236705	0.00243725	0.00101163	0.0133936	Novel	1	1	Activated
ZFX	0.0217642	0.00432044	0.00731156	0.00739786	0.00602106	0.0036358	0.0195911	Novel	1	1	Activated
TFCP2	0.0151301	0.00300866	0.00363708	0.00313902	0.00506153	0.00345494	0.0122903	Novel	1	1	Activated
ZNF410	0.0311709	0.00763024	0.013561	0.0101211	0.0134209	0.00816304	0.026214	Novel	1	1	Activated
AHR	0.011256	0.00118477	0.00230457	0.00346783	0.000908635	0.00161254	0.00516582	Novel	1	1	Activated
ARID3A	0.0240111	0.0167045	0.0159691	0.0166307	0.0167604	0.0178941	0.0208797	Activate_TFs	0.937259	0.924284	Activated
GABPA	0.0215528	0.0110312	0.0126031	0.0126464	0.0136368	0.0136279	0.0176386	Activate_TFs	0.999995	0.999312	Activated
NFATC3	0.0190366	0.00381335	0.00526776	0.00447353	0.00519313	0.00529013	0.0107426	Inhibite_TFs	1	1	Activated
CPEB1	0.0423474	0.0426366	0.04799	0.0480694	0.0496231	0.0466271	0.0578172	Activate_TFs	1.00833e-05	0.998289	Activated
UBE2K	0.0626269	0.0700151	0.0699576	0.0741867	0.0709919	0.0787334	0.0813153	Activate_TFs	0	0.0978849	Activated
FOXO3	0.0522193	0.0604963	0.0665772	0.0594153	0.0634855	0.0569059	0.0744545	Inhibite_TFs	1.77636e-15	0.914949	Activated
MXI1	0.043187	0.0495623	0.0534432	0.0489539	0.0488167	0.0466659	0.0531485	Activate_TFs	1.15038e-05	0.363419	Activated
ZFP14	0.0721288	0.0814332	0.0789352	0.0813002	0.0753236	0.0742132	0.0865241	Novel	1	1	Activated
HLF	0.055828	0.0692748	0.0651791	0.0679139	0.0650847	0.06714	0.0817342	Activate_TFs	0	5.95054e-08	Activated
ZBTB7A	0.0867775	0.114891	0.114612	0.116203	0.116663	0.109824	0.138391	Activate_TFs	0	1.90618e-08	Activated
USF2	0.0464687	0.0434499	0.0477083	0.0530455	0.0490471	0.0435175	0.0850792	Activate_TFs	0.000283059	1	Activated
KLF9	0.0698051	0.0811655	0.0809231	0.0789391	0.0825807	0.0761655	0.138798	Activate_TFs	0	0.532912	Activated
NFE2L1	0.063378	0.0723335	0.0724725	0.073061	0.0699065	0.0694924	0.110937	Novel	0	1.9269e-09	Activated
BCLAF1	0.036589	0.0351386	0.0349306	0.0354806	0.0350833	0.0377958	0.048417	Activate_TFs	2.26374e-11	0.999998	Activated
CEBPB	0.0384374	0.0349732	0.0332877	0.0326082	0.0328351	0.0334904	0.0638622	Activate_TFs	0	0.978159	Activated
ETS2	0.0345454	0.0219275	0.0212609	0.019887	0.0187641	0.0183559	0.108992	Activate_TFs	1.75415e-14	1	Activated
JUN	0.034167	0.0297571	0.0297199	0.0294339	0.0286781	0.02959	0.0606739	Activate_TFs	0	0.999929	Activated
RAD21	0.0378535	0.0331928	0.0338582	0.0348507	0.0348821	0.0349215	0.0627679	Activate_TFs	0	0.999831	Activated
TEF	0.0355397	0.0310409	0.0314337	0.0311534	0.0326187	0.0306481	0.0648388	Activate_TFs	0	0.999999	Activated
ATF4	0.0409929	0.0340267	0.0353726	0.0343671	0.0358649	0.037942	0.0835047	Activate_TFs	0	0.999998	Activated
MAZ	0.0254971	0.020366	0.0223631	0.0202994	0.0229027	0.0229547	0.0518489	Activate_TFs	1.0022e-12	0.999961	Activated
CHURC1	0.0223095	0.0122112	0.0187367	0.0148107	0.0174881	0.01578	0.0762724	Novel	0.00266001	1	Activated
ELK1	0.0596774	0.0562861	0.0585534	0.0577972	0.0588325	0.0589096	0.0768347	Activate_TFs	0	0.0746865	Activated
EGR1	0.0489373	0.0554509	0.0498038	0.0503655	0.0483541	0.0496206	0.0817872	Activate_TFs	0	0.711778	Activated
FOSL2	0.0344584	0.0345171	0.029865	0.0312795	0.0304256	0.0318385	0.0536853	Activate_TFs	0	0.963078	Activated
EGR3	0.0413177	0.0416983	0.0374011	0.0389216	0.0371359	0.0381506	0.0857667	Activate_TFs	0	0.99992	Activated
ID2	0.0243692	0.0258867	0.0192519	0.020671	0.0172515	0.0184282	0.0892579	Novel	4.7415e-07	1	Activated
PKM	0.131303	0.146152	0.137521	0.117992	0.115694	0.126973	0.454338	Activate_TFs	1.13243e-13	1	Activated
BHLHE40	0.033191	0.032335	0.0326121	0.0312079	0.0317113	0.0333456	0.0592101	Activate_TFs	0	0.998681	Activated
STAT1	0.0440634	0.0452136	0.0454045	0.0436363	0.0440142	0.044168	0.114951	Activate_TFs	0	0.99957	Activated
YY1	0.0487308	0.0471516	0.0486578	0.0480634	0.0478064	0.0475725	0.0944063	Activate_TFs	0	0.991733	Activated
TAF7	0.0885099	0.0820985	0.0882574	0.0670704	0.0995084	0.0699487	0.264117	Activate_TFs	1.88187e-06	1	Activated
NFIC	0.0540573	0.0484332	0.0528303	0.0432341	0.0453071	0.039371	0.175057	Activate_TFs	0	1	Activated
UBTF	0.0462207	0.0434096	0.0449268	0.0434621	0.0454576	0.037881	0.0845074	Activate_TFs	0	0.953594	Activated
NPDC1	0.0277103	0.0166957	0.0177728	0.0166786	0.0201198	0.0154038	0.0469408	Novel	0.0642738	1	Activated
POLR2A	0.0280894	0.0216233	0.0211306	0.0215129	0.0224345	0.0228414	0.0441455	Activate_TFs	4.50751e-14	0.999999	Activated
RBBP5	0.0224871	0.0146654	0.0146275	0.014753	0.0148106	0.0152746	0.0366394	Activate_TFs	2.12059e-11	1	Activated
KLF6	0.020018	0.0109052	0.0158386	0.0131282	0.0118306	0.0132945	0.0383344	Activate_TFs	0.0269722	1	Activated
NR2C2	0.0277149	0.0229656	0.025405	0.0250694	0.0235765	0.0255885	0.0405917	Activate_TFs	0.000768796	0.999556	Activated
PSMD12	0.0049162	0.00189937	0.00221409	0.00223215	0.00165897	0.00282136	0.0153375	Novel	1	1	Activated
SREBF2	0.029328	0.0230066	0.0257186	0.0256519	0.0259427	0.0284901	0.0411763	Activate_TFs	3.26028e-09	0.999922	Activated
BHLHE41	0.0182317	0.00761126	0.0100522	0.0101683	0.0110329	0.0124178	0.0354026	Activate_TFs	0.0393147	1	Activated
KLF13	0.0196801	0.012338	0.0131866	0.0135153	0.0134562	0.0159325	0.0302704	Novel	0.368715	1	Activated
HIF1A	0.0549504	0.0452873	0.0490118	0.0496974	0.0483853	0.0532068	0.0619949	Novel	8.64674e-08	0.960015	Activated
LHX2	0.0194096	0.0126198	0.0166296	0.0139953	0.0137793	0.0180721	0.0241894	Inhibite_TFs	0.372951	0.899509	Activated
GTF2I	0.0445208	0.0382973	0.038963	0.0365709	0.0332877	0.0415663	0.0552948	Novel	1	1	Activated
ZFP90	0.0173656	0.0070629	0.00662608	0.00941721	0.0061755	0.011737	0.0238312	Novel	0.626609	1	Activated
EP300	0.040863	0.0392601	0.0345537	0.0399339	0.0338285	0.0408175	0.0352821	Novel	0.750473	0.426746	Inhibited
ZNF33B	0.0610862	0.0465914	0.0313527	0.0464816	0.0224019	0.0562848	0.0352308	Novel	1	1	Inhibited
IRF2	0.0200198	0.0154195	0.0146327	0.0214093	0.0137446	0.0307427	0.0198793	Activate_TFs	0.83052	0.501457	Inhibited
SMAD1	0.0224709	0.0198476	0.0215415	0.0192999	0.013938	0.0326723	0.0281971	Novel	0.891395	0.880281	Inhibited
ZNF429	0.0187478	0.0165062	0.0118923	0.0152514	0.0104342	0.0209693	0.0189498	Novel	1	1	Inhibited
FOXN2	0.0338257	0.0293724	0.0236494	0.0321617	0.0308876	0.0329901	0.0277404	Inhibite_TFs	0.392265	0.906834	Inhibited
GTF3C2	0.0227544	0.0170601	0.013274	0.0170061	0.0204239	0.0196872	0.0176409	Novel	1	0.517978	Inhibited
NRF1	0.0256293	0.0169612	0.020044	0.0194002	0.0176843	0.0219821	0.0163286	Inhibite_TFs	0.986811	0.776677	Inhibited
NR2C1	0.0449166	0.0139355	0.0256322	0.020323	0.0248685	0.0259266	0.0225818	Activate_TFs	1	1	Inhibited
ZNF248	0.0445118	0.028878	0.029741	0.0281152	0.0299002	0.0347123	0.0305147	Novel	1	1	Inhibited
BDP1	0.0574535	0.039786	0.0415127	0.0448565	0.0472301	0.0454625	0.0284919	Inhibite_TFs	1	0.228012	Inhibited
RUNX1	0.0148221	0.0121497	0.0118677	0.0101531	0.0133164	0.0155404	0.00778077	Activate_TFs	1	0.827194	Inhibited
CREB1	0.0410171	0.0412453	0.051748	0.0489889	0.0440964	0.0472539	0.0492565	Activate_TFs	0.11944	0.919934	Inhibited
RARB	0.0415158	0.0240563	0.0984454	0.0499512	0.0444916	0.0506164	0.0318173	Inhibite_TFs	1	0.0710547	Inhibited
PHF8	0.0316238	0.0280213	0.0300396	0.0295212	0.0231176	0.028604	0.0295068	Activate_TFs	0.818817	0.908972	Inhibited
RFX1	0.0273625	0.0194871	0.0263669	0.0229619	0.0216229	0.0282695	0.0255593	Activate_TFs	0.817481	0.803336	Inhibited
TCF7L2	0.0303128	0.0167522	0.0348075	0.0193087	0.0200668	0.0258528	0.0252916	Activate_TFs	0.808237	0.793824	Inhibited
BACH2	0.0149859	0.00754065	0.0131757	0.00830555	0.017639	0.0123444	0.0132276	Inhibite_TFs	0.485567	1	Inhibited
ZNF84	0.0342748	0.0318041	0.0326694	0.0299415	0.0374676	0.0335359	0.0356037	Novel	0.0428245	0.821805	Inhibited
ETV5	0.0341052	0.0385061	0.0367639	0.033744	0.0474514	0.0417977	0.0446782	Inhibite_TFs	0.129974	0.472817	Inhibited
MZF1	0.0310524	0.0285314	0.0323644	0.0301313	0.0388433	0.0354335	0.031994	Novel	0.722971	0.699897	Inhibited
STAT3	0.0101185	0.00570363	0.00953616	0.00785299	0.00767269	0.0142194	0.0106889	Novel	1	1	Inhibited
ZNF568	0.0398878	0.0354889	0.0383029	0.0379493	0.0397126	0.0441401	0.0393547	Novel	0.148424	0.502294	Inhibited
ZFHX2	0.022095	0.0133964	0.016261	0.0161779	0.0204139	0.0198114	0.0205936	Activate_TFs	0.715344	1	Inhibited
ZFP64	0.018558	0.00798057	0.0102804	0.0133336	0.0145344	0.0205977	0.0175092	Novel	0.607734	1	Inhibited
MEIS3	0.0329614	0.0364798	0.0436817	0.0582353	0.0647826	0.0403686	0.0428328	Activate_TFs	0.617287	0.600812	Inhibited
TBL1XR1	0.0589833	0.0606878	0.0672335	0.0711003	0.0668398	0.065275	0.0596058	Inhibite_TFs	1	1	Inhibited
TEAD1	0.035841	0.0355089	0.109825	0.0872997	0.115746	0.0975311	0.036731	Inhibite_TFs	1	1	Inhibited
SETDB1	0.0324123	0.0226909	0.0339666	0.0226499	0.0672307	0.018967	0.0111994	Activate_TFs	1	0.19081	Inhibited
ZFHX3	0.0247636	0.031402	0.031533	0.0308959	0.133103	0.0309107	0.0221025	Inhibite_TFs	1	0.186257	Inhibited
POU2F1	0.107265	0.250336	0.234215	0.277484	0.336331	0.215684	0.0458132	Novel	1	0.000639636	Inhibited
ZNF519	0.0522056	0.102905	0.0842965	0.140221	0.177347	0.0909217	0.0411829	Activate_TFs	1	0.00759768	Inhibited
BCL11A	0.0396806	0.0599464	0.0801956	0.0599365	0.110148	0.0430885	0.0455223	Inhibite_TFs	0.374482	0.15732	Inhibited
ETV6	0.0289487	0.0392053	0.0468635	0.0446539	0.0597943	0.0261515	0.0216244	Novel	0.986478	0.00759851	Inhibited
FOXP2	0.0584482	0.0761489	0.0953228	0.0830715	0.0969327	0.0780127	0.0483657	Inhibite_TFs	0.0299279	0	Inhibited
ABL1	0.0426853	0.0514235	0.0612023	0.0556919	0.0625529	0.0481154	0.0293899	Novel	1	0.212241	Inhibited
HMBOX1	0.0497016	0.0537152	0.0560804	0.0546322	0.0583971	0.0499688	0.0440565	Novel	0.367595	0.191511	Inhibited
FOXN3	0.054316	0.0686653	0.105404	0.0845817	0.130152	0.0784844	0.0426555	Inhibite_TFs	0.969974	2.54569e-10	Inhibited
GLIS1	0.0254619	0.0622821	0.0691406	0.054142	0.0933927	0.0522591	0.017865	Novel	1	0.0710547	Inhibited
ZNF43	0.0342046	0.0412354	0.0361611	0.0499079	0.0421094	0.0576691	0.0217673	Novel	1	0.264028	Inhibited
CHD2	0.0468102	0.0519434	0.0524521	0.0548356	0.0484811	0.0593765	0.0353532	Inhibite_TFs	0.951873	1.50454e-05	Inhibited
SOX5	0.140922	0.204919	0.235381	0.271957	0.204926	0.331434	0.0839083	Inhibite_TFs	0.812916	6.66134e-16	Inhibited
FOXP1	0.0526698	0.072003	0.0926586	0.0798966	0.0650282	0.0943666	0.0467582	Inhibite_TFs	1	0.0496569	Inhibited
ATF1	0.0398568	0.03857	0.042038	0.041585	0.0382123	0.0439084	0.0343341	Activate_TFs	0.940576	0.0283351	Inhibited
MGA	0.0355584	0.0355484	0.0400822	0.0419075	0.0351666	0.0414593	0.0302777	Activate_TFs	0.772792	1	Inhibited
ATF6	0.0415239	0.0365941	0.0402943	0.0373552	0.0346809	0.0593193	0.0286851	Inhibite_TFs	1	0.856852	Inhibited
TAF1	0.0427514	0.0412334	0.0393668	0.0417206	0.0388428	0.0444296	0.0360399	Activate_TFs	0.947968	0.931072	Inhibited
CELF5	0.0930563	0.15423	0.1142	0.134864	0.163916	0.191836	0.0778569	Novel	1	0.228012	Inhibited
KDM5A	0.0355921	0.0340751	0.0331429	0.0360683	0.0366739	0.0405972	0.0317149	Inhibite_TFs	0.974138	0.995347	Inhibited
PBX3	0.0328125	0.04024	0.0346026	0.0446716	0.0372126	0.0726463	0.0270457	Inhibite_TFs	0.707579	0.0382687	Inhibited
POU2F2	0.0323345	0.0386485	0.0277242	0.0386296	0.0370428	0.0498552	0.0290006	Inhibite_TFs	0.615548	0.865255	Inhibited
PPARG	0.0198591	0.0244725	0.0169257	0.0164754	0.0221417	0.0200219	0.0113663	Inhibite_TFs	1	0.0245799	Inhibited
RCOR1	0.0344782	0.039092	0.0265537	0.0352064	0.0354814	0.0335712	0.0288572	Activate_TFs	0.248852	0.282851	Inhibited
ATF2	0.059751	0.0736505	0.0670091	0.0715108	0.0625617	0.075177	0.0659743	Inhibite_TFs	0.640856	0.610873	Inhibited
MEF2A	0.105924	0.247148	0.148601	0.188014	0.140506	0.218117	0.116811	Inhibite_TFs	1	0.15182	Inhibited
PPARGC1A	0.0452054	0.0836104	0.0495929	0.0665897	0.0544064	0.0609481	0.0514664	Activate_TFs	0.152218	0.316639	Inhibited
TCF12	0.0378537	0.0557493	0.0263427	0.0467298	0.0234456	0.0386629	0.0208098	Inhibite_TFs	1	0.291151	Inhibited
RFX2	0.0491234	0.0862456	0.0480076	0.0594858	0.0509692	0.0728155	0.0297078	Inhibite_TFs	0.764756	2.97086e-05	Inhibited
TRPS1	0.0564484	0.135172	0.0461992	0.0825135	0.0571952	0.0923907	0.02912	Novel	1	0.00550379	Inhibited
ZNF831	0.0307053	0.0450889	0.030104	0.0627595	0.0426982	0.0425668	0.0195302	Novel	1	0.561341	Inhibited
ZNF91	0.0576628	0.0710458	0.0704313	0.072618	0.0687782	0.074373	0.0523312	Inhibite_TFs	0	0	Inhibited
CUX1	0.0629807	0.0965721	0.0819986	0.0868187	0.0793523	0.0971534	0.0457544	Inhibite_TFs	0.957579	0	Inhibited
NR3C1	0.0606773	0.086753	0.0729078	0.0796969	0.0767355	0.0797801	0.0468536	Inhibite_TFs	0.948535	0	Inhibited
ZEB1	0.0603115	0.0761438	0.0863922	0.0817927	0.0799148	0.0779203	0.0458812	Inhibite_TFs	0.173679	0	Inhibited
BPTF	0.110092	0.144272	0.146747	0.166339	0.151725	0.158443	0.0678025	Inhibite_TFs	0.459584	0.0196158	Inhibited
RFX7	0.0573503	0.0688874	0.071247	0.0732884	0.0740515	0.0721258	0.0415557	Novel	0.993936	5.00277e-06	Inhibited
HMGB1	0.0491187	0.0767076	0.0849306	0.0748678	0.0774879	0.0738329	0.0500454	Novel	0.957624	0.0299687	Inhibited
PBX1	0.106207	0.187251	0.178139	0.159182	0.181999	0.138423	0.0621912	Inhibite_TFs	1	6.82046e-05	Inhibited
JUND	0.0603637	0.0686278	0.0699831	0.0693763	0.0676156	0.0709121	0.0688284	Inhibite_TFs	0	1.17566e-10	Inhibited
ARID5B	0.0316118	0.0452129	0.0417918	0.0400042	0.0397252	0.0338555	0.0343785	Novel	1	1	Inhibited
TCF4	0.0939813	0.145467	0.164083	0.148763	0.0952416	0.128398	0.0918411	Inhibite_TFs	1	1	Inhibited

## Sheet: Mathys AD
Table.S7. Details of the transcription factor lists and identified from the SCENIC algorithm with pathway enrichment analysis.
Separated-Mathys et al. (AD)	SCENIC calculated transcripton regulon activities in different sub-cluaters/layers
Transcription factors	ES	LS	L2/3	L4/5	L4/6	L5	L5/6	L6	TFStatusIdnetifiedByIntegratedDatasets	PvalueForUpMarkers	PvalueForDownMarkers				Pathway enrichment among activated transcription factors
JUND	0.0533732	0.0561404	0.0631827	0.0616372	0.0622315	0.0569613	0.0590597	0.0611374	Inhibite_TFs	0	0.000665278	Inhibited			Index	Name	P-value
RAD21	0.0724025	0.0873513	0.0960184	0.0974108	0.0915574	0.0855651	0.0860589	0.0939115	Activate_TFs	8.75467e-09	0.0705115	Inhibited			1	TNF-alpha Signaling via NF-kB	1.899e-10
HLF	0.0600092	0.0786866	0.0791162	0.0811946	0.0809042	0.0749715	0.0750705	0.0791226	Activate_TFs	0	1.1428e-05	Inhibited			2	UV Response Dn	0.0006217
PRNP	0.127115	0.18821	0.209145	0.197722	0.197421	0.17	0.182244	0.181541	Novel	0	0.692028	Inhibited			3	G2-M Checkpoint	0.002662
NRF1	0.0514646	0.0302737	0.0557721	0.0564275	0.0587074	0.0579809	0.0589035	0.055344	Inhibite_TFs	1	4.24596e-05	Inhibited			4	IL-6/JAK/STAT3 Signaling	0.008251
ZNF37A	0.0399573	0.0321562	0.044329	0.0442154	0.0432777	0.0454838	0.0457599	0.0449816	Novel	0.703767	0.112432	Inhibited			5	Hypoxia	0.01524
FOXP1	0.0961806	0.0558223	0.140551	0.151187	0.142324	0.136812	0.126236	0.143631	Inhibite_TFs	0.999529	0	Inhibited			6	Unfolded Protein Response	0.01669
MEF2C	0.340924	0.109233	0.574345	0.60499	0.542038	0.530897	0.500025	0.522484	Inhibite_TFs	1	3.66374e-15	Inhibited			7	DNA Repair	0.0347
ZEB1	0.0578328	0.037103	0.0749358	0.0804617	0.0778649	0.0743436	0.0748752	0.0686839	Inhibite_TFs	0.438919	0	Inhibited			8	IL-2/STAT5 Signaling	0.06915
FOXP2	0.0770306	0.0461541	0.106584	0.107236	0.104	0.10551	0.106643	0.100255	Inhibite_TFs	0.0492624	0	Inhibited			9	Interferon Gamma Response	0.06998
CERS6	0.0600219	0.0387853	0.081585	0.0786214	0.0775162	0.0740502	0.0755144	0.0777388	Novel	1	0.0107939	Inhibited			10	mTORC1 Signaling	0.06998
KMT2A	0.05832	0.0370544	0.0780664	0.0739337	0.0747197	0.0712107	0.075689	0.0716585	Novel	0.999365	9.57634e-12	Inhibited
MXI1	0.0404705	0.0392655	0.0441576	0.0484119	0.0422689	0.0438386	0.0427751	0.0410141	Activate_TFs	0.0217419	0.624801	Inhibited
PKNOX2	0.0324615	0.0162964	0.0363128	0.0429887	0.0261619	0.0300514	0.0244198	0.0178273	Novel	1	0.184575	Inhibited			Pathway enrichment among inhibited transcription factors
DNMT3A	0.0585368	0.0338177	0.0720771	0.057144	0.0624797	0.0575743	0.0556232	0.059248	Novel	0.870635	5.70215e-07	Inhibited			Index	Name	P-value
TCF12	0.0594719	0.0257543	0.0825801	0.0548863	0.0678243	0.0581553	0.0546772	0.0544715	Inhibite_TFs	0.998747	3.4861e-14	Inhibited			1	Hypoxia	0.005878
ONECUT2	0.0706056	0.0311396	0.0972078	0.0557592	0.0682255	0.0485754	0.058378	0.0747373	Novel	0.754525	6.6667e-07	Inhibited			2	G2-M Checkpoint	0.03552
RFX2	0.0495853	0.0149922	0.0713507	0.030075	0.0419679	0.0238014	0.0294113	0.0438882	Inhibite_TFs	1	1.97204e-05	Inhibited			3	heme Metabolism	0.03552
UBE2K	0.0538132	0.0514712	0.0611038	0.060154	0.0605079	0.0557243	0.0588247	0.061939	Activate_TFs	0.077546	0.249814	Inhibited			4	Myogenesis	0.03552
CUX1	0.0641198	0.0369281	0.085715	0.0737701	0.0788942	0.0677488	0.0723613	0.0819422	Inhibite_TFs	0.945557	0	Inhibited			5	UV Response Dn	0.09502
MEF2A	0.084037	0.0538967	0.118499	0.108173	0.111142	0.0945594	0.100792	0.107917	Inhibite_TFs	0.255699	0	Inhibited			6	IL-2/STAT5 Signaling	0.1608
NR3C1	0.0512007	0.0406816	0.0650098	0.0586812	0.0629592	0.053854	0.0575609	0.0613962	Inhibite_TFs	0.031849	0	Inhibited			7	TNF-alpha Signaling via NF-kB	0.1621
ATF2	0.0368263	0.0331931	0.042064	0.0382243	0.0393186	0.0368035	0.0398937	0.0403457	Inhibite_TFs	0.186088	0.311846	Inhibited			8	Complement	0.1621
NFAT5	0.128844	0.0476423	0.261224	0.153138	0.226368	0.134918	0.162822	0.205389	Novel	1	7.29215e-06	Inhibited			9	Reactive Oxygen Species Pathway	0.1622
POU2F2	0.0655424	0.0305599	0.0888019	0.047563	0.0855637	0.0393957	0.0656338	0.0951782	Inhibite_TFs	1	2.50534e-05	Inhibited			10	TGF-beta Signaling	0.1772
TBL1XR1	0.0492556	0.0349227	0.0684481	0.0570705	0.0546736	0.0439492	0.0506338	0.0704201	Inhibite_TFs	1	1	Inhibited
IKZF2	0.02988	0.0209702	0.0247947	0.0282607	0.0743039	0.0305183	0.0725849	0.0463006	Inhibite_TFs	1	1	Inhibited
NFIA	0.115466	0.0511972	0.180826	0.132157	0.247266	0.106392	0.250757	0.19929	Novel	1	1.67268e-08	Inhibited
RXRB	0.0330786	0.0279197	0.0333721	0.0357311	0.0366787	0.0297385	0.0335021	0.0328395	Activate_TFs	0.83052	0.816791	Inhibited
USF2	0.0487534	0.0460122	0.0539456	0.0528345	0.0560463	0.0422067	0.0485402	0.0533415	Activate_TFs	0.00192312	0.261282	Inhibited
NFIC	0.0388056	0.0372539	0.0417514	0.0436861	0.0435745	0.0350353	0.0425761	0.0339058	Activate_TFs	0.471068	0.783852	Inhibited
ETV6	0.0375659	0.0235731	0.0448424	0.0416665	0.0411358	0.037807	0.0456306	0.0339687	Novel	0.532692	0.240783	Inhibited
ZBTB7A	0.049318	0.0430327	0.0573606	0.054809	0.0569169	0.0498598	0.0534012	0.049714	Activate_TFs	5.94484e-07	0.000196909	Inhibited
ZNF131	0.00860438	0.00461269	0.00619533	0.00807659	0.00625858	0.0104345	0.00850238	0.00661169	Novel	1	1	Inhibited
BACH2	0.0126169	0.00361959	0.00991783	0.0174579	0.0054648	0.0215882	0.0127773	0.00674153	Inhibite_TFs	1	0.418011	Inhibited
IRF2	0.017596	0.00949102	0.0153797	0.0166085	0.010028	0.0245174	0.0181708	0.0112332	Activate_TFs	1	0.619199	Inhibited
CREB5	0.0188883	0.0108075	0.0210945	0.0319543	0.0160098	0.0415929	0.0198931	0.0303154	Inhibite_TFs	1	0.259529	Inhibited
KDM7A	0.0258685	0.019499	0.021439	0.0296173	0.0198414	0.0365841	0.0221138	0.023232	Novel	1	0.216176	Inhibited
HIVEP2	0.0620112	0.0459836	0.0625164	0.105208	0.0696826	0.157165	0.138438	0.0972794	Novel	1	0.064539	Inhibited
BCL11A	0.0419801	0.0309897	0.0441672	0.0662721	0.0467092	0.0928586	0.0819915	0.0401007	Inhibite_TFs	0.514359	0.01566	Inhibited
FOXN3	0.0282352	0.021617	0.0275089	0.0396335	0.0308374	0.047762	0.0463726	0.0269852	Inhibite_TFs	0.999998	0.000140705	Inhibited
HIVEP1	0.0333495	0.0262735	0.0288836	0.0404061	0.0431411	0.0477865	0.0556933	0.0435852	Inhibite_TFs	0.957624	0.0299687	Inhibited
TEAD1	0.02288	0.0164238	0.0219244	0.0312675	0.0308077	0.0324079	0.033587	0.0262806	Inhibite_TFs	0.999418	0.162448	Inhibited
NR6A1	0.0353754	0.0247059	0.0347276	0.0333818	0.0347691	0.0347904	0.0387529	0.0342901	Activate_TFs	0.995006	0.126812	Inhibited
EP300	0.0266612	0.017675	0.0289007	0.0264441	0.0249269	0.0309108	0.0342894	0.0256459	Novel	0.990672	0.3569	Inhibited
KDM5A	0.0290962	0.0202007	0.0279343	0.0270551	0.0277564	0.030639	0.0328621	0.0240399	Inhibite_TFs	0.958662	0.579998	Inhibited
RFX1	0.0177176	0.013748	0.0168784	0.0139109	0.0114704	0.0223051	0.02158	0.0150335	Activate_TFs	1	1	Inhibited
ZFHX3	0.0376416	0.0204461	0.0403855	0.0403687	0.0443307	0.0814309	0.128354	0.0430559	Inhibite_TFs	1	0.00438664	Inhibited
TRMT1	0.0297266	0.024363	0.0242273	0.0273896	0.0285353	0.0272723	0.0272718	0.0299424	Novel	1	1	Inhibited
ARNT	0.0253982	0.0211541	0.021045	0.0224788	0.0220845	0.0227429	0.0251611	0.0243385	Inhibite_TFs	0.980743	0.478304	Inhibited
SP4	0.0254302	0.018276	0.0218081	0.0233854	0.0205923	0.0253286	0.0246182	0.0252056	Activate_TFs	1	0.228599	Inhibited
FOXK2	0.0229787	0.0200777	0.0249957	0.0217436	0.0208677	0.0273828	0.0224245	0.0305803	Novel	0.708233	0.692028	Inhibited
SREBF2	0.0303561	0.0307253	0.0297031	0.0323679	0.0328632	0.0318688	0.0311427	0.036665	Activate_TFs	0.428404	0.922506	Inhibited
ESRRG	0.10735	0.057798	0.127601	0.162101	0.211896	0.13033	0.159112	0.214053	Novel	1	8.56855e-08	Inhibited
ZNF33A	0.0327107	0.0270171	0.0332733	0.0347141	0.0436589	0.0385129	0.0382454	0.044045	Novel	0.308667	1	Inhibited
NR2F1	0.0139109	0.0167386	0.0117552	0.0133599	0.00812525	0.00673237	0.00798621	0.0224831	Activate_TFs	0.635704	1	Inhibited
FOXJ3	0.0508695	0.0567257	0.0238213	0.0314767	0.0373137	0.0292354	0.0302677	0.088512	Novel	1	1	Inhibited
KLF7	0.0236266	0.0260834	0.00934639	0.012857	0.0237938	0.0189501	0.0173859	0.0448143	Activate_TFs	1	0.470342	Inhibited
SNAI3	0.00764851	0.00410556	0.00579066	0.00442989	0.00452875	0.00363486	0.00692817	0.0103448	Novel	1	1	Inhibited
POU6F1	0.0239271	0.0267558	0.0253173	0.0206992	0.0231745	0.0170961	0.030148	0.0309452	Activate_TFs	1	0.360525	Inhibited
ZNF623	0.0244601	0.0221932	0.0304761	0.0233286	0.0213054	0.0149466	0.0442688	0.0306437	Novel	1	1	Inhibited
FOXN2	0.0336795	0.0262665	0.0407615	0.0284888	0.026401	0.0239009	0.0329513	0.0270597	Inhibite_TFs	0.199754	0.186728	Inhibited
ZNF235	0.0220956	0.0115013	0.0199364	0.0201311	0.0112882	0.0107618	0.0202882	0.0179449	Novel	1	1	Inhibited
ATF1	0.0275442	0.0238591	0.0251223	0.0259921	0.0258438	0.0252612	0.0290054	0.0247767	Activate_TFs	0.94401	0.846761	Inhibited
TAF1	0.0240777	0.0200335	0.022025	0.0216627	0.0220217	0.0213718	0.0236746	0.0220157	Activate_TFs	0.999897	0.362036	Inhibited
ZNF493	0.0334006	0.0277895	0.0307175	0.0312436	0.0276727	0.0311554	0.032076	0.0292809	Novel	1	1	Inhibited
ZNF814	0.0332046	0.029004	0.028932	0.0292179	0.0275301	0.0288268	0.0305433	0.0292147	Activate_TFs	0.57653	0.980247	Inhibited
CREB1	0.0206471	0.0179783	0.0234366	0.0156171	0.0213994	0.0236022	0.0181507	0.0174157	Activate_TFs	1	1	Inhibited
BRF1	0.025892	0.0226616	0.0234308	0.0242831	0.0248373	0.0221417	0.0223197	0.0228053	Activate_TFs	0.984836	0.340857	Inhibited
PPARGC1A	0.0242806	0.016016	0.0261655	0.0121445	0.0215662	0.0167607	0.0103793	0.0228252	Activate_TFs	1	0.470342	Inhibited
ELF2	0.0204854	0.0168338	0.0170276	0.0154509	0.016288	0.0171946	0.0165075	0.0177122	Inhibite_TFs	0.995512	0.840758	Inhibited
SMAD3	0.0254086	0.013894	0.0163201	0.0112325	0.017514	0.0127259	0.0122041	0.0188186	Novel	1	1	Inhibited
RCOR1	0.0101682	0.010218	0.00610202	0.00475848	0.00621158	0.00463785	0.00540875	0.00910865	Activate_TFs	1	1	Activated
EGR3	0.0315106	0.0415479	0.0319763	0.0278693	0.0323134	0.0241569	0.0259148	0.0328605	Activate_TFs	9.80446e-08	0.878926	Activated
THRA	0.0299704	0.0489995	0.0203272	0.0173775	0.028155	0.0149867	0.0175132	0.0294399	Activate_TFs	0.0197351	1	Activated
SMAD1	0.0219927	0.0211427	0.0165082	0.0136835	0.0183499	0.011215	0.01993	0.0152684	Novel	1	0.669443	Activated
TRIM28	0.0336312	0.0353557	0.0333163	0.0298764	0.032826	0.0270833	0.0320898	0.0310045	Activate_TFs	0.0766371	0.432528	Activated
ELK1	0.0766971	0.0695252	0.0662089	0.0648968	0.080141	0.0559157	0.0704697	0.0714753	Activate_TFs	0.00803549	1	Activated
LHX2	0.0219108	0.0207901	0.0207593	0.0194239	0.0214933	0.014903	0.0180202	0.018299	Inhibite_TFs	0.891395	0.622416	Activated
BCLAF1	0.033267	0.0395976	0.0356795	0.037695	0.0352865	0.0360517	0.0350158	0.0370356	Activate_TFs	9.01213e-07	0.967283	Activated
ATF4	0.0358538	0.0497701	0.040938	0.0439815	0.0425189	0.0405692	0.0387511	0.0426573	Activate_TFs	0	0.331398	Activated
NFE2L1	0.0501866	0.0713697	0.0625847	0.064854	0.0639851	0.0589038	0.0575371	0.0620379	Novel	0	0.0168245	Activated
ETS2	0.0422605	0.0559277	0.0451754	0.0462095	0.047832	0.0429608	0.0438189	0.0465123	Activate_TFs	0	0.290372	Activated
YY1	0.0411601	0.0513784	0.0443583	0.0451047	0.0463637	0.0429043	0.0434693	0.0440308	Activate_TFs	0	0.711987	Activated
BHLHE40	0.023446	0.0409001	0.0252084	0.0269795	0.0257478	0.0235658	0.023968	0.0272842	Activate_TFs	4.44089e-16	0.99893	Activated
TAF7	0.0358892	0.0590258	0.0381184	0.0405068	0.0397686	0.0373933	0.0363318	0.0432917	Activate_TFs	0	0.852555	Activated
EGR1	0.0284364	0.0424322	0.0314171	0.0322704	0.0316241	0.0268953	0.0294806	0.0324412	Activate_TFs	1.67022e-12	0.982255	Activated
JUN	0.036798	0.0581821	0.044594	0.0416214	0.0438987	0.0370193	0.0391281	0.0464921	Activate_TFs	0	0.97133	Activated
POLR2A	0.0329402	0.0404597	0.0303439	0.0310948	0.0319177	0.0298125	0.0305928	0.0318558	Activate_TFs	1.56941e-09	0.976738	Activated
HDAC2	0.021897	0.0340202	0.0181636	0.019662	0.0192287	0.0179388	0.0178266	0.0203251	Activate_TFs	0.000341178	0.998621	Activated
ZNF281	0.0217127	0.0422559	0.0166906	0.0181953	0.0185894	0.0173747	0.0166399	0.0185304	Activate_TFs	0.00192312	1	Activated
GTF2F1	0.0251479	0.0405448	0.0213698	0.0245169	0.0224271	0.0241276	0.0221544	0.0239033	Activate_TFs	6.34093e-12	0.993862	Activated
PSMD12	0.0233673	0.0508595	0.0170533	0.0228291	0.0217838	0.0218253	0.020875	0.0235245	Novel	0.0049934	1	Activated
CREB3	0.0340069	0.0535936	0.0315258	0.0329053	0.0347699	0.0315392	0.0322123	0.0343297	Novel	1.98987e-06	0.977873	Activated
RBBP5	0.0193336	0.0314969	0.0172298	0.0185029	0.0184709	0.0178642	0.0179566	0.0175435	Activate_TFs	0.000942269	0.999297	Activated
KLF9	0.0344168	0.0579891	0.0385948	0.0429221	0.0386088	0.0391802	0.0388747	0.0361078	Activate_TFs	0	0.952255	Activated
ESRRA	0.0255571	0.0317251	0.0240049	0.0253126	0.0244078	0.0239334	0.0226859	0.0243777	Activate_TFs	0.000202811	0.987734	Activated
FOXG1	0.0185793	0.031851	0.0178133	0.0198191	0.0170346	0.0176588	0.0159872	0.0156244	Activate_TFs	0.000219057	1	Activated
KLF13	0.0107389	0.0186826	0.0104236	0.0123745	0.0105094	0.0102504	0.00982429	0.0105177	Novel	0.170844	1	Activated
CEBPB	0.0184532	0.0247521	0.0113127	0.00948794	0.0125435	0.0101218	0.0117594	0.0108715	Activate_TFs	1	1	Activated
MAZ	0.0140777	0.0212598	0.00993968	0.00954793	0.0103684	0.0093963	0.00963238	0.0100327	Activate_TFs	0.141298	1	Activated
FOXK1	0.0271463	0.0310516	0.0239575	0.0264665	0.0237176	0.0252126	0.0236056	0.024223	Novel	0.510161	1	Activated
MAX	0.019241	0.0229208	0.0156415	0.0165236	0.0149539	0.0164704	0.0163216	0.0161661	Activate_TFs	0.946014	1	Activated
CEBPZ	0.0137991	0.0183747	0.00820799	0.00851424	0.00763817	0.0102108	0.00971591	0.00713922	Novel	0.821935	0.807927	Activated
SMC3	0.0169084	0.0239095	0.00877057	0.0103641	0.00991864	0.0129274	0.0105047	0.009337	Novel	0.213551	1	Activated
STAT5B	0.0218937	0.0274045	0.0142459	0.0153177	0.0146971	0.0180761	0.0162074	0.0159208	Activate_TFs	0.292099	0.999635	Activated
MXD1	0.0273614	0.0337884	0.0253044	0.0265221	0.0250544	0.0274472	0.0270479	0.0263196	Activate_TFs	0.463175	0.995322	Activated
GABPB1	0.0195629	0.0245151	0.017503	0.019501	0.0168908	0.0193941	0.0188083	0.0179776	Activate_TFs	0.214284	0.999297	Activated
PURA	0.0675412	0.105436	0.0604872	0.0715983	0.0599885	0.0690965	0.0677962	0.0604566	Novel	0.0197351	1	Activated
KLF6	0.0209376	0.0297916	0.0152612	0.0176864	0.0164954	0.021824	0.0144575	0.0196439	Activate_TFs	0.004361	0.984036	Activated
E2F4	0.0173027	0.0273607	0.014098	0.0149157	0.0141533	0.0161618	0.0149412	0.0161799	Activate_TFs	0.0230368	1	Activated
POLR3A	0.0183446	0.02489	0.014362	0.0155085	0.0142028	0.0163212	0.0150515	0.0170126	Novel	0.796198	0.999447	Activated
ETV5	0.00693325	0.00700531	0.00198038	0.00123186	0.00227185	0.0122864	0.00322322	0.00329066	Inhibite_TFs	1	1	Activated
TCF7L2	0.0194526	0.022314	0.0134794	0.0111944	0.0170287	0.0261308	0.01708	0.0208555	Activate_TFs	1	1	Activated
ARID3A	0.0342493	0.0336495	0.0232344	0.0311037	0.0213715	0.0386025	0.0281462	0.0308116	Activate_TFs	0.352663	0.699208	Activated
MAFG	0.0111557	0.014155	0.00904182	0.0112245	0.00944319	0.0167573	0.0101155	0.0164645	Novel	0.780963	0.936819	Activated
NFKB1	0.0195178	0.0164761	0.015291	0.016376	0.0161788	0.0193395	0.0183838	0.0172623	Activate_TFs	0.996071	0.977149	Activated
ZNF91	0.0535463	0.0232768	0.00848357	0.0204709	0.0320034	0.0429476	0.0296401	0.0253156	Inhibite_TFs	1	1	Activated
ZNF782	0.0425199	0.0366769	0.027486	0.027724	0.0308406	0.0598779	0.0252558	0.0150093	Novel	1	1	Activated
CPEB1	0.0114295	0.00703233	0.00399533	0.00634241	0.0061412	0.00949234	0.00484986	0.00332913	Activate_TFs	1	1	Activated
MLXIP	0.0261408	0.0217604	0.019924	0.018745	0.0172396	0.0262565	0.0197561	0.0181971	Novel	1	0.713073	Activated
STAT2	0.0133555	0.0159026	0.00500749	0.00763395	0.00666187	0.00925109	0.00827105	0.00695106	Novel	0.828902	1	Activated
ZNF345	0.0217061	0.0261633	0.00228732	0.00406048	0.00618433	0.0115247	0.0075364	0.00522611	Inhibite_TFs	1	1	Activated
EMX1	0.0168496	0.0206892	0.00150568	0.00355879	0.00489477	0.00692953	0.00606293	0.00405588	Novel	1	1	Activated
JDP2	0.0102355	0.0120081	0.00218797	0.00328447	0.00329733	0.00556249	0.00419918	0.00298813	Activate_TFs	1	1	Activated
PPARG	0.0352996	0.0425859	0.00198329	0.0063279	0.00705912	0.0140133	0.0101473	0.00512508	Inhibite_TFs	1	1	Activated
NFYC	0.0168337	0.0193221	0.0130112	0.0131785	0.0143395	0.0143907	0.0145766	0.0136566	Activate_TFs	0.969548	0.987603	Activated
NFE2L2	0.0119689	0.018037	0.00307557	0.00468732	0.00483246	0.00687437	0.00628938	0.00438047	Activate_TFs	0.857444	1	Activated
NR1D2	0.0176365	0.0248976	0.00244317	0.00577332	0.00451026	0.00826857	0.00711915	0.00391939	Activate_TFs	1	1	Activated
HSF2	0.0132735	0.0177244	0.00361961	0.00471785	0.00513632	0.00716638	0.00622626	0.00601153	Novel	1	1	Activated
NR1H2	0.0160565	0.0209547	0.00515377	0.00636971	0.0063613	0.0100811	0.0076275	0.00670327	Activate_TFs	0.652561	1	Activated
NR2F6	0.0349971	0.0480153	0.00153128	0.00608591	0.00739161	0.0150617	0.0120799	0.00683699	Activate_TFs	1	1	Activated
GTF2B	0.0246175	0.0267607	0.0160224	0.0157359	0.0150381	0.0179652	0.0178187	0.016774	Activate_TFs	0.716164	0.947784	Activated
NR2C2	0.0296927	0.0310194	0.0233933	0.0236959	0.0233917	0.0253907	0.0259504	0.0250862	Activate_TFs	0.529674	0.99167	Activated
GLIS1	0.0844027	0.090943	0.032842	0.0325361	0.0337123	0.0594632	0.0358852	0.0371037	Novel	1	1	Activated
ZNF544	0.0165007	0.0168173	0.00643855	0.00600156	0.00759002	0.01057	0.00848739	0.00961663	Novel	1	1	Activated
CHD2	0.0300924	0.0304562	0.0246657	0.0222539	0.0230186	0.0229873	0.0223552	0.0244883	Inhibite_TFs	0.948665	0.998497	Activated
ZNF76	0.0251796	0.0264637	0.0198317	0.0195278	0.0185466	0.0197067	0.0187756	0.0197774	Activate_TFs	0.174723	0.872552	Activated
ATF6	0.0265131	0.0287934	0.0103949	0.0122833	0.0122391	0.0145599	0.0147218	0.0193877	Inhibite_TFs	1	1	Activated
ZNF335	0.0133094	0.0146873	0.00617835	0.00752513	0.00880972	0.00739058	0.00749072	0.0094975	Novel	1	1	Activated
REL	0.0171959	0.0211942	0.00843381	0.0114223	0.0105727	0.0134092	0.0109055	0.0133905	Novel	1	1	Activated
NR1D1	0.0153381	0.0178214	0.00680083	0.00898214	0.0085924	0.00894947	0.00683791	0.00945687	Activate_TFs	1	1	Activated
STAT3	0.0197386	0.0225582	0.00921171	0.00971132	0.00931778	0.0107855	0.00955066	0.0119431	Novel	0.925075	0.916052	Activated
STAT6	0.0186715	0.0229332	0.00534327	0.00785417	0.00709882	0.00853501	0.0079969	0.0104779	Activate_TFs	1	1	Activated
RUNX1	0.0127245	0.0106522	0.00408202	0.00529086	0.00431971	0.00836072	0.00804424	0.00564947	Activate_TFs	1	1	Activated
ZFX	0.0149836	0.0152393	0.00671141	0.00675003	0.00843238	0.0103873	0.0114044	0.00673504	Novel	1	1	Activated
E2F3	0.0257824	0.0242843	0.0224469	0.0209292	0.0226266	0.0230885	0.0229155	0.0229259	Inhibite_TFs	0.96984	0.778808	Activated
UBTF	0.0430597	0.0336394	0.0237645	0.0261793	0.029976	0.0314708	0.0330339	0.0303623	Activate_TFs	1	0.738919	Activated
SRF	0.0208483	0.0196315	0.0160736	0.0176019	0.0162555	0.0175123	0.020707	0.0203	Activate_TFs	0.949593	1	Activated
ATF6B	0.0178916	0.018566	0.0149849	0.0148606	0.0141577	0.0155785	0.015167	0.017297	Activate_TFs	0.999901	0.999977	Activated
ELK4	0.0191588	0.019342	0.015313	0.0157168	0.0137087	0.0168633	0.0166655	0.0167443	Activate_TFs	0.922623	0.991473	Activated
HINFP	0.017715	0.0200983	0.0113773	0.0135465	0.0115162	0.0152387	0.0157279	0.0163668	Novel	0.949593	0.942532	Activated
PRKAA2	0.0136653	0.0133892	0.00684017	0.00761716	0.00717268	0.0135858	0.0158387	0.00486785	Novel	1	1	Activated
ZNF362	0.0270797	0.0294597	0.02542	0.0283955	0.0264426	0.0281684	0.03322	0.0256714	Novel	0.566689	0.310173	Activated
SETDB1	0.0224366	0.0254414	0.0153968	0.0170871	0.016214	0.020094	0.0201284	0.0167851	Activate_TFs	0.665699	0.996444	Activated
CLOCK	0.0150429	0.0210103	0.00582909	0.00915828	0.00703184	0.0143135	0.0100878	0.00837538	Activate_TFs	1	1	Activated
SIN3A	0.0207738	0.0241304	0.0137052	0.0163252	0.0132941	0.0189825	0.017328	0.0137237	Activate_TFs	0.384018	0.999998	Activated
SMARCC2	0.0234299	0.026418	0.0183435	0.020678	0.0184825	0.0221384	0.0208019	0.0192047	Activate_TFs	0.93067	0.999004	Activated
BHLHE41	0.0115553	0.018646	0.00764664	0.00929858	0.00686811	0.00918718	0.0100281	0.00593565	Activate_TFs	1	1	Activated
ZNF714	0.0168779	0.0207219	0.0108117	0.01484	0.0119732	0.0140687	0.0157052	0.0121327	Novel	0.311516	0.935304	Activated
ZNF84	0.0182523	0.0250849	0.0104112	0.0136745	0.0111149	0.01492	0.0160763	0.0120094	Novel	0.63442	1	Activated
PHF8	0.0252263	0.0256751	0.0189736	0.0204305	0.0192622	0.0212023	0.019764	0.0170109	Activate_TFs	0.521277	0.98098	Activated
SP3	0.0268892	0.025782	0.0209911	0.022159	0.0222568	0.023409	0.0211673	0.0207342	Activate_TFs	0.998116	0.863776	Activated
FOXO3	0.025628	0.0257813	0.0152456	0.0197747	0.0161257	0.0218617	0.0183844	0.015539	Inhibite_TFs	1	1	Activated
TFDP1	0.0209759	0.023812	0.0108527	0.0143733	0.0133171	0.0198162	0.0153324	0.0103364	Activate_TFs	0.396271	1	Activated
CTCF	0.0216359	0.0224331	0.0156043	0.017978	0.0156367	0.0193971	0.0195455	0.0146355	Activate_TFs	0.796661	0.998785	Activated
TOB2	0.0140995	0.0155764	0.0103893	0.0121452	0.00969764	0.0129692	0.0112788	0.00821403	Novel	1	1	Activated

## Sheet: Lau AD
Table.S7. Details of the transcription factor lists and identified from the SCENIC algorithm with pathway enrichment analysis.
Separated-Lau et al. (AD)	SCENIC calculated transcripton regulon activities in different sub-cluaters/layers
Transcription factors	ES	LS	L2/3	L4/5	L4/6	L5	L5/6	L6	TFStatusIdnetifiedByIntegratedDatasets	PvalueForUpMarkers	PvalueForDownMarkers				Pathway enrichment among activated transcription factors
FOXN2	0.0196094	0.0164611	0.0106606	0.00893048	0.0216994	0.00937924	0.0121701	0.0119426	Inhibite_TFs	1	1	Activated			Index	Name	P-value
RCOR1	0.0281768	0.0247275	0.0269291	0.0143089	0.0197109	0.0156553	0.0171631	0.0216169	Activate_TFs	1	0.636741	Activated			1	TNF-alpha Signaling via NF-kB	3.123e-08
ZNF189	0.0461346	0.0484611	0.0445164	0.0378159	0.0411415	0.0357973	0.0412392	0.0435774	Novel	0.0393024	0.885388	Activated			2	Hypoxia	0.000196
CREM	0.0315052	0.0254635	0.0272272	0.0256396	0.0258636	0.0258279	0.0265651	0.0261812	Novel	0.875812	0.850659	Activated			3	Unfolded Protein Response	0.004661
SETDB1	0.0186313	0.0149592	0.0148909	0.0142924	0.0137551	0.0130243	0.0113697	0.016107	Activate_TFs	0.987759	0.786391	Activated			4	G2-M Checkpoint	0.006929
GABPB1	0.0226223	0.0212703	0.0198252	0.0199233	0.0190418	0.0189578	0.0196993	0.0203559	Activate_TFs	0.998365	0.732182	Activated			5	Interferon Gamma Response	0.006929
ELF2	0.0112601	0.00905463	0.00383744	0.00405852	0.00354264	0.00485164	0.00629513	0.00571631	Inhibite_TFs	1	1	Activated			6	IL-6/JAK/STAT3 Signaling	0.01515
GLIS1	0.0101789	0.00993417	0.00193982	0.00266078	0.00141077	0.00359132	0.00257802	0.0031864	Novel	1	1	Activated			7	Wnt-beta Catenin Signaling	0.02589
POU6F1	0.00974237	0.0101578	0.0033739	0.00403859	0.00349853	0.00424999	0.00425414	0.00420567	Activate_TFs	1	1	Activated			8	Inflammatory Response	0.03168
IRF2	0.028248	0.0268321	0.0249429	0.0228032	0.0225301	0.0239873	0.0221943	0.0215472	Activate_TFs	0.421774	0.982673	Activated			9	p53 Pathway	0.03168
FOXJ3	0.0274678	0.0274276	0.0206325	0.0206673	0.0220073	0.0214983	0.0194526	0.020655	Novel	0.597942	1	Activated			10	UV Response Dn	0.05476
SP1	0.0145075	0.0133931	0.00791388	0.00756126	0.0089999	0.010473	0.00730926	0.0091336	Novel	1	0.948954	Activated
GTF2IRD1	0.0119401	0.00637523	0.00273851	0.00361752	0.00296383	0.00722618	0.00478945	0.00435071	Activate_TFs	1	1	Activated
HNRNPH3	0.0100999	0.00924506	0.00381581	0.0046257	0.00430922	0.0069901	0.00811428	0.00450206	Novel	1	1	Activated			Pathway enrichment among inhibited transcription factors
NFKB1	0.0110888	0.0100889	0.00701757	0.00822974	0.00698093	0.0110793	0.0071744	0.00910444	Activate_TFs	0.992921	1	Activated			Index	Name	P-value
TOPORS	0.0209082	0.0180658	0.015553	0.0180427	0.0171499	0.0201892	0.0195355	0.0194902	Novel	1	1	Activated			1	UV Response Dn	0.009701
RAB2A	0.0453594	0.100707	0.0729092	0.0711309	0.0739845	0.0648007	0.0643416	0.0910257	Novel	0.158205	1	Activated			2	Notch Signaling	0.09319
BCLAF1	0.035768	0.0410575	0.0383685	0.0381764	0.0369673	0.0370409	0.0340945	0.0376731	Activate_TFs	0.000446366	0.999558	Activated			3	IL-2/STAT5 Signaling	0.1233
ZBTB7A	0.0623058	0.0686871	0.0657266	0.0658598	0.0650819	0.0621346	0.0628047	0.0653436	Activate_TFs	0	1.71727e-05	Activated			4	G2-M Checkpoint	0.1243
NR1D1	0.0297536	0.0948622	0.0360053	0.0457435	0.0321505	0.0338843	0.0358036	0.0299296	Activate_TFs	6.47681e-06	1	Activated			5	Myogenesis	0.1243
RAD21	0.0353435	0.0674349	0.03446	0.0366729	0.0331029	0.0349933	0.0327117	0.0315129	Activate_TFs	0	0.999994	Activated			6	TGF-beta Signaling	0.1523
BHLHE40	0.0456578	0.0905243	0.0464017	0.045926	0.0419536	0.0444298	0.042113	0.0394883	Activate_TFs	0	0.93602	Activated			7	Cholesterol Homeostasis	0.2026
NFE2L1	0.0494928	0.137653	0.0520769	0.0530146	0.0463085	0.0477176	0.0439827	0.04215	Novel	0	1	Activated			8	Hypoxia	0.4588
ETS2	0.030421	0.0618077	0.0297484	0.0283516	0.02617	0.0280911	0.0253818	0.0253607	Activate_TFs	0	0.999932	Activated			9	p53 Pathway	0.4588
YY1	0.0340004	0.0682687	0.0309838	0.0314181	0.0294877	0.029987	0.029391	0.0284661	Activate_TFs	0	0.999993	Activated			10	heme Metabolism	0.4588
USF2	0.04131	0.0727827	0.0433313	0.0407199	0.0390649	0.0374047	0.0352154	0.0364925	Activate_TFs	0	0.879646	Activated
NFIC	0.0318457	0.0954251	0.0343112	0.0320544	0.0252782	0.0261968	0.0264685	0.0279725	Activate_TFs	0.000145564	1	Activated
TEF	0.0648566	0.10163	0.0650638	0.0640604	0.0620811	0.0585237	0.0604928	0.0591742	Activate_TFs	0	0.608688	Activated
FOSL2	0.0336276	0.0574822	0.033524	0.0312482	0.0300234	0.0301133	0.0302328	0.0267536	Activate_TFs	0	0.970906	Activated
MAZ	0.0443964	0.0697666	0.04526	0.0461682	0.0430595	0.0422564	0.0429039	0.0391364	Activate_TFs	0	0.436943	Activated
NEUROD2	0.0597283	0.206817	0.0678829	0.0733893	0.0549489	0.0549909	0.0574946	0.0461445	Novel	1.72529e-13	1	Activated
EGR3	0.0532665	0.0842747	0.0542926	0.0488849	0.0476409	0.041481	0.0466352	0.0488569	Activate_TFs	0	0.652742	Activated
JUN	0.0370857	0.0647519	0.0353335	0.0300521	0.0299144	0.0266942	0.02921	0.02815	Activate_TFs	0	0.999716	Activated
MEF2D	0.0661051	0.110929	0.065623	0.0594583	0.0575694	0.0502798	0.0519094	0.0550151	Activate_TFs	0	0.988294	Activated
CEBPD	0.0535605	0.08728	0.0611326	0.0541938	0.053967	0.0472946	0.0554791	0.058966	Activate_TFs	0	0.109177	Activated
ELK1	0.06055	0.0745111	0.0637222	0.0635597	0.0626451	0.0603765	0.0608713	0.06217	Activate_TFs	0	4.60212e-07	Activated
KLF9	0.0340475	0.0596509	0.0361389	0.035674	0.0340769	0.0318974	0.0352696	0.0337976	Activate_TFs	0	0.993786	Activated
THRA	0.0654115	0.156781	0.0792627	0.0673773	0.0753653	0.0550513	0.0658486	0.0699387	Activate_TFs	1.29059e-06	1	Activated
CLOCK	0.0429577	0.0519014	0.0422073	0.0451159	0.0430227	0.0461526	0.0455874	0.0462349	Activate_TFs	2.88797e-05	0.971949	Activated
SREBF2	0.0455187	0.0599418	0.0483215	0.0507459	0.0506128	0.0473478	0.0480472	0.0493001	Activate_TFs	0	0.000573742	Activated
HLF	0.0486861	0.0712771	0.0568464	0.0579169	0.055395	0.0548697	0.0533924	0.0537474	Activate_TFs	0	0.000945205	Activated
PKM	0.162738	0.51569	0.24185	0.254662	0.227501	0.20912	0.202435	0.202751	Activate_TFs	0	1	Activated
JUND	0.0499072	0.0610314	0.0536894	0.0527799	0.0525253	0.0520104	0.0515751	0.0520816	Inhibite_TFs	0	0	Activated
ZBTB18	0.145919	0.39743	0.223418	0.201043	0.189675	0.189134	0.182012	0.163368	Novel	0	1	Activated
KLF6	0.0184662	0.0269868	0.0115342	0.0134535	0.0117892	0.0161305	0.0131008	0.0202354	Activate_TFs	0.828179	0.930086	Activated
KLF7	0.0113219	0.012196	0.00372471	0.00530314	0.00430984	0.00432885	0.0064969	0.00744617	Activate_TFs	1	1	Activated
SF1	0.0238579	0.0313399	0.012284	0.0154234	0.0145686	0.0131546	0.0161917	0.0226575	Novel	1	1	Activated
ATF1	0.0312842	0.0348315	0.0255883	0.0291566	0.0290657	0.0246208	0.0346386	0.0320699	Activate_TFs	0.25488	0.501457	Activated
CPEB1	0.0178846	0.0234626	0.00915736	0.0199577	0.0210215	0.0149521	0.0154778	0.0182092	Activate_TFs	1	1	Activated
GTF2F1	0.0248617	0.0413579	0.0138242	0.0135831	0.0134388	0.0195333	0.0202575	0.0171926	Activate_TFs	0.156021	1	Activated
NR2F6	0.00877453	0.0144542	0.00174254	0.00304085	0.00221182	0.00540122	0.00486316	0.00363739	Activate_TFs	1	1	Activated
SP3	0.0175976	0.0205642	0.0117346	0.012387	0.0118413	0.0136227	0.0140118	0.0134681	Activate_TFs	0.917399	0.96282	Activated
MAX	0.0239167	0.0289342	0.0199417	0.0211085	0.0196665	0.0206362	0.021317	0.0211957	Activate_TFs	0.168077	0.755841	Activated
ZNF718	0.0153286	0.0273995	0.0056881	0.0087128	0.00559885	0.00906599	0.00869013	0.010857	Novel	1	1	Activated
STAT5B	0.0157498	0.0201805	0.0108514	0.0107765	0.0103225	0.0112909	0.0118468	0.010861	Activate_TFs	0.180063	0.945192	Activated
PHF8	0.027205	0.0330649	0.0224425	0.0221332	0.0218536	0.0226936	0.0224658	0.0223872	Activate_TFs	0.004612	0.939105	Activated
ZNF592	0.0165562	0.026104	0.0079818	0.00909376	0.00775677	0.00973234	0.00916019	0.00819771	Novel	0.599597	1	Activated
CTCF	0.021263	0.0265211	0.0154468	0.0159111	0.0148291	0.0167318	0.0152554	0.0169595	Activate_TFs	0.109704	0.972159	Activated
TFDP1	0.0279069	0.0341496	0.0226573	0.0206822	0.0206038	0.0227875	0.0215992	0.023103	Activate_TFs	7.86783e-05	0.977303	Activated
HSF1	0.0316728	0.0402756	0.0240793	0.0279684	0.023807	0.0269083	0.0207692	0.0221891	Novel	0.0290933	0.812411	Activated
TAF1	0.0274701	0.0290429	0.0259141	0.0266648	0.0259967	0.0269485	0.0255704	0.0261298	Activate_TFs	0.308885	0.906294	Activated
YBX1	0.0206063	0.027348	0.0136214	0.0150354	0.0122814	0.0124682	0.01378	0.00963064	Novel	0.175621	0.880281	Activated
GTF3A	0.0385478	0.0610842	0.0225062	0.0196535	0.0151433	0.0119887	0.0168094	0.0144855	Activate_TFs	1	1	Activated
JDP2	0.0259731	0.0330965	0.0195329	0.019825	0.0158132	0.0149878	0.0191	0.0174766	Activate_TFs	0.404835	0.738919	Activated
POLR3A	0.0175057	0.0267686	0.00912558	0.0126071	0.00832572	0.0148183	0.0130313	0.00744787	Novel	1	1	Activated
HSF2	0.0115152	0.0184374	0.00444339	0.00529815	0.00315755	0.00784149	0.00625401	0.00353033	Novel	1	1	Activated
SIN3A	0.0258714	0.0316002	0.0199298	0.020749	0.0185434	0.0214025	0.0221907	0.0178626	Activate_TFs	0.0777235	0.989433	Activated
POU2F2	0.0215997	0.0272256	0.00685877	0.00766169	0.00729067	0.0101225	0.0112112	0.00605995	Inhibite_TFs	1	1	Activated
RXRB	0.00834248	0.0102416	0.00272264	0.00329449	0.00278391	0.00450519	0.00327569	0.00265051	Activate_TFs	1	1	Activated
STAT3	0.0127028	0.016838	0.00731004	0.00749965	0.00688343	0.0088856	0.00664272	0.00488814	Novel	0.597942	1	Activated
MZF1	0.0169334	0.0226367	0.0092576	0.00981693	0.00824012	0.0105824	0.00920364	0.00763816	Novel	1	1	Activated
SMARCA1	0.0327747	0.0442901	0.0173827	0.0160115	0.0135167	0.0179133	0.0168606	0.0133316	Novel	1	1	Activated
ZNF362	0.0140329	0.0194645	0.00687212	0.00625345	0.00535046	0.00805363	0.00592629	0.00620679	Novel	0.0488974	1	Activated
ZNF444	0.0337315	0.0492847	0.0173773	0.0185205	0.0117318	0.0201851	0.0153706	0.0140316	Novel	1	1	Activated
DBP	0.0399668	0.0604132	0.0279448	0.0330215	0.0278211	0.0320824	0.0273798	0.0264229	Novel	3.20955e-11	0.983705	Activated
NFYB	0.0190422	0.0307566	0.0116587	0.0132806	0.0110998	0.0138776	0.0108299	0.0114107	Activate_TFs	0.116036	1	Activated
TAF7	0.02987	0.0482111	0.0226484	0.0232647	0.0212184	0.0210386	0.0198979	0.0251009	Activate_TFs	0.00350599	0.97042	Activated
LARP4	0.0107204	0.0247179	0.00461007	0.00528368	0.00286181	0.00583442	0.0053679	0.00462686	Novel	1	1	Activated
RBBP5	0.024479	0.0375047	0.0174462	0.0184077	0.017055	0.0192857	0.018561	0.0191473	Activate_TFs	6.59051e-12	0.999838	Activated
GABPA	0.0213236	0.0286829	0.0155614	0.0171754	0.0153175	0.0160948	0.0162289	0.0161123	Activate_TFs	0.0123799	0.999326	Activated
SMARCC2	0.00533972	0.014941	0.000987009	0.00161535	0.00149908	0.0013938	0.00131126	0.000748552	Activate_TFs	1	1	Activated
ZNF25	0.00473136	0.0118296	0.00107565	0.00186952	0.00102831	0.000872904	0.000678332	0.00144219	Activate_TFs	1	1	Activated
PPARD	0.0291183	0.0622291	0.0162925	0.0183529	0.0144531	0.0263766	0.0202465	0.0110039	Activate_TFs	0.0155604	1	Activated
HIF1A	0.0243195	0.0559267	0.0146167	0.0183205	0.0132	0.0206078	0.0155534	0.013214	Novel	1.21146e-06	1	Activated
ZNF281	0.0244497	0.0420512	0.0195863	0.0201883	0.0180818	0.02019	0.0197446	0.0167976	Activate_TFs	5.46224e-06	0.999763	Activated
CEBPG	0.0348614	0.0767622	0.029034	0.0340724	0.0279165	0.0315442	0.0302211	0.0290019	Activate_TFs	9.70335e-14	1	Activated
ATF4	0.0299161	0.0618267	0.02395	0.0268089	0.0229762	0.0260915	0.0225326	0.0227418	Activate_TFs	0	0.999976	Activated
CREBL2	0.0352672	0.0625331	0.0289734	0.0313237	0.0289181	0.0309568	0.029557	0.0284647	Activate_TFs	1.19904e-14	0.995333	Activated
ESRRA	0.0368642	0.0676779	0.029672	0.0308947	0.0279816	0.0298731	0.0269261	0.0287711	Activate_TFs	0	0.999636	Activated
MNT	0.0295252	0.069648	0.0212969	0.0241486	0.0211002	0.0216507	0.0199628	0.0203782	Novel	0	1	Activated
SRF	0.0391399	0.0556287	0.0306571	0.0329925	0.0292428	0.0299178	0.0307775	0.0283557	Activate_TFs	1.46407e-07	0.999769	Activated
TRIM28	0.0381619	0.0625441	0.0294642	0.0325159	0.0279906	0.0290074	0.0305383	0.025609	Activate_TFs	3.09409e-10	0.998788	Activated
HDAC2	0.0196288	0.0334785	0.0161615	0.0149894	0.013555	0.0157915	0.0137591	0.0140357	Activate_TFs	0.00668687	0.96268	Activated
KLF16	0.0371175	0.0598214	0.0312147	0.0286726	0.0267498	0.0280112	0.0273746	0.0274071	Activate_TFs	0	0.998181	Activated
KLF13	0.0421411	0.0688229	0.0390742	0.0393755	0.0359757	0.0360078	0.0393602	0.0359303	Novel	0	0.991346	Activated
UBTF	0.0622518	0.0913456	0.0578659	0.0568157	0.0535422	0.0526243	0.0534412	0.0525068	Activate_TFs	0	0.803543	Activated
CEBPB	0.0450487	0.0698432	0.038287	0.0387294	0.0362213	0.0357711	0.0383667	0.0367403	Activate_TFs	0	0.989611	Activated
POLR2A	0.044452	0.066502	0.0376273	0.0394745	0.036623	0.036402	0.0361158	0.0366525	Activate_TFs	0	0.937243	Activated
SMAD5	0.024388	0.0410085	0.0234013	0.0251807	0.0246567	0.0251718	0.0198096	0.0270884	Novel	0.22663	1	Activated
NR2F1	0.0156093	0.0277126	0.0102702	0.0124299	0.00928476	0.00701808	0.00845515	0.0163954	Activate_TFs	0.83052	1	Activated
POU3F2	0.00678773	0.016433	0.00174941	0.00506811	0.00284471	0.00100872	0.00370879	0.00443821	Novel	1	1	Activated
ELK4	0.0356525	0.053243	0.0326403	0.0347486	0.0313745	0.0313212	0.0311097	0.0342856	Activate_TFs	5.17813e-09	0.999193	Activated
EMX1	0.0261694	0.0470134	0.0228951	0.0257891	0.0212053	0.0222274	0.0243852	0.025406	Novel	0.0522185	0.745009	Activated
LHX2	0.0311649	0.0498255	0.0252225	0.0348756	0.030853	0.0411894	0.0256846	0.0180994	Inhibite_TFs	0.0109462	0.57156	Activated
MXI1	0.0404585	0.0484332	0.0355882	0.0429009	0.0392302	0.0447293	0.0380248	0.0358979	Activate_TFs	1.39061e-06	0.857683	Activated
FOXG1	0.0510868	0.0778743	0.0416014	0.0531128	0.041498	0.0649917	0.0547654	0.0481936	Activate_TFs	1	1	Activated
NR2C2	0.0328089	0.0449724	0.0297259	0.0308846	0.0275828	0.0355967	0.0317541	0.0284225	Activate_TFs	3.32133e-06	0.976574	Activated
PSMC2	0.0194254	0.0283553	0.015052	0.01715	0.0135204	0.0225657	0.0151026	0.0139841	Novel	0.244689	1	Activated
ZNF84	0.0348888	0.0423591	0.00804128	0.0142066	0.0144278	0.0457914	0.025345	0.010066	Novel	1	1	Activated
SP4	0.0264981	0.0314453	0.0218067	0.0229588	0.0230812	0.0271368	0.0255391	0.0220594	Activate_TFs	0.775936	0.977969	Activated
ZNF26	0.0285089	0.047285	0.0113833	0.0163245	0.0125018	0.0285311	0.026988	0.00978833	Novel	0.218117	1	Activated
RFXAP	0.0232091	0.0344702	0.0144909	0.0162807	0.0150405	0.022457	0.0184755	0.015313	Novel	0.121682	1	Activated
E2F4	0.0142269	0.018069	0.0102156	0.0107161	0.0102445	0.0141918	0.0113866	0.00960245	Activate_TFs	0.955469	1	Activated
STAT2	0.0220934	0.0287085	0.00865245	0.0122513	0.00961357	0.0196678	0.0145861	0.00876894	Novel	1	1	Activated
MXD1	0.037894	0.0391589	0.031903	0.0379103	0.0290099	0.0262983	0.0270842	0.0236087	Activate_TFs	0.0326061	0.145392	Activated
CREB1	0.0400651	0.0383926	0.0382155	0.0394044	0.037301	0.0379718	0.0384393	0.0356487	Activate_TFs	0.635316	0.997923	Activated
ZNF675	0.0138494	0.00849999	0.00564769	0.00932987	0.00529907	0.0074502	0.0052958	0.00469362	Novel	1	1	Activated
FOXO3	0.0428053	0.0462561	0.04018	0.0440938	0.041374	0.0411597	0.0440819	0.0390902	Inhibite_TFs	0.71776	0.999676	Activated
ZMAT2	0.0906313	0.118038	0.110132	0.121938	0.104843	0.103884	0.114341	0.0898813	Novel	0.0189349	1	Activated
EP300	0.0225677	0.0186092	0.0205077	0.0215997	0.0221968	0.0220581	0.0222383	0.0212268	Novel	0.997324	1	Inhibited
ZNF146	0.035235	0.0227721	0.0315406	0.0288871	0.0314955	0.0311648	0.0341428	0.0338776	Novel	1	0.375407	Inhibited
CHD1	0.0358014	0.0234179	0.0226749	0.0287357	0.0349411	0.0354311	0.0329955	0.0217292	Novel	1	1	Inhibited
MYEF2	0.0318646	0.0260026	0.0318519	0.0304575	0.0302561	0.02983	0.0340633	0.0233615	Novel	1	1	Inhibited
STAU2	0.0402333	0.037755	0.0428572	0.0465777	0.0427968	0.051714	0.0413476	0.0406051	Novel	1	1	Inhibited
PPARG	0.0129238	0.00873534	0.0125082	0.012691	0.0137926	0.0215812	0.0151292	0.0151621	Inhibite_TFs	1	0.537456	Inhibited
BACH2	0.0177099	0.0111524	0.0105496	0.014695	0.0128791	0.0308176	0.0147474	0.0135352	Inhibite_TFs	1	1	Inhibited
PLAGL1	0.0136272	0.0128081	0.00946305	0.0258759	0.0109918	0.0620602	0.0354318	0.00739331	Novel	1	1	Inhibited
ZNF565	0.0221069	0.0132016	0.0168819	0.0183606	0.0136118	0.0248157	0.0150285	0.010792	Novel	1	1	Inhibited
ETV5	0.0246369	0.0210095	0.0282659	0.0227029	0.0241552	0.039284	0.0291957	0.0221776	Inhibite_TFs	0.934973	0.199793	Inhibited
ZNF667	0.0119748	0.0102147	0.012063	0.00941196	0.0106751	0.0151222	0.0119607	0.00974924	Activate_TFs	1	1	Inhibited
TCF7L2	0.0165504	0.01599	0.0129573	0.0185784	0.0164513	0.020306	0.0164732	0.0122205	Activate_TFs	0.998357	0.82703	Inhibited
RARB	0.016875	0.0146343	0.0195399	0.101161	0.0632812	0.0920251	0.0644248	0.00961853	Inhibite_TFs	1	0.0257995	Inhibited
ZFP64	0.0160104	0.0148507	0.0102854	0.0309082	0.0219915	0.0328804	0.0154983	0.0127135	Novel	0.661685	0.272691	Inhibited
FOXK2	0.0526632	0.0568102	0.0588167	0.0601687	0.0596103	0.0631746	0.0645244	0.0578236	Novel	0.000283942	0.366114	Inhibited
HIVEP1	0.0207861	0.0144448	0.0246024	0.0300001	0.0350702	0.0387774	0.0375535	0.0171827	Inhibite_TFs	1	0.636741	Inhibited
BCL11A	0.0365489	0.029094	0.0466949	0.0552838	0.0430495	0.0692803	0.0688834	0.0429859	Inhibite_TFs	1	1	Inhibited
FOXN3	0.0545763	0.0352839	0.0670513	0.0950552	0.0820333	0.111247	0.0974924	0.0722375	Inhibite_TFs	0.974858	5.74938e-11	Inhibited
TBR1	0.00688878	0.0142765	0.00207345	0.00327868	0.00364943	0.00665622	0.00289455	0.0184653	Novel	1	1	Inhibited
ZNF589	0.00465711	0.00728165	0.00286476	0.00253967	0.00290069	0.00551933	0.00350819	0.0175225	Novel	1	1	Inhibited
ARNTL2	0.02214	0.0129805	0.0220358	0.0311387	0.025174	0.0510582	0.0110379	0.0745163	Novel	1	1	Inhibited
POU2F1	0.0691133	0.0488427	0.0622295	0.0625141	0.0675033	0.0933682	0.0701142	0.0969656	Novel	1	1	Inhibited
UBP1	0.03081	0.0221347	0.0324499	0.0291678	0.0272732	0.0229816	0.0287035	0.0435721	Novel	1	1	Inhibited
ZNF331	0.0449984	0.0198273	0.0656311	0.0360505	0.0679487	0.0100651	0.0180469	0.112801	Novel	1	0.171543	Inhibited
PBX3	0.0740496	0.0481661	0.102976	0.0837949	0.139585	0.0978898	0.114401	0.233478	Inhibite_TFs	0.545204	7.06576e-06	Inhibited
MEF2A	0.0526579	0.0476502	0.0779829	0.0701097	0.0711004	0.0654677	0.0606947	0.0863778	Inhibite_TFs	1	0.307261	Inhibited
SMAD1	0.0717955	0.0255044	0.112585	0.102334	0.135291	0.0699812	0.110799	0.170778	Novel	1	0.0354894	Inhibited
TRPS1	0.176038	0.0540882	0.304256	0.179529	0.269054	0.128072	0.177634	0.333835	Novel	1	1.57652e-14	Inhibited
ATF2	0.0446805	0.04843	0.052737	0.0467564	0.0496208	0.0442567	0.0489794	0.0498412	Inhibite_TFs	0.000237149	0.186696	Inhibited
UBE2K	0.0673128	0.0774781	0.0876032	0.0866745	0.085182	0.0804696	0.0819999	0.0825101	Activate_TFs	0	2.40362e-08	Inhibited
CUX2	0.202066	0.0502177	0.365289	0.185937	0.236694	0.146203	0.173455	0.205968	Novel	1	0	Inhibited
ONECUT2	0.0664083	0.037618	0.111753	0.0569192	0.0761008	0.0485838	0.0657478	0.0694683	Novel	0.143212	4.57682e-07	Inhibited
BRF1	0.0484166	0.0444194	0.0499003	0.0480885	0.0481032	0.047351	0.0466736	0.0479238	Activate_TFs	0.158894	0.124609	Inhibited
MLXIPL	0.0647244	0.0532248	0.0714728	0.0675782	0.0634432	0.0664587	0.0618132	0.0715757	Activate_TFs	0.51775	0.0246394	Inhibited
FOXK1	0.0321316	0.0186932	0.038998	0.0299361	0.0354781	0.0318705	0.0174109	0.0215681	Novel	1	0.677149	Inhibited
ZNF75A	0.03845	0.0265705	0.0382207	0.0255057	0.0250292	0.0249711	0.0223396	0.0169794	Novel	1	0.431558	Inhibited
PBX1	0.266587	0.0699753	0.457214	0.394419	0.339527	0.358591	0.391038	0.228375	Inhibite_TFs	1	0	Inhibited
TCF4	0.159595	0.0790127	0.247934	0.250245	0.246455	0.195054	0.172591	0.231367	Inhibite_TFs	1	0.000793303	Inhibited
MEF2C	0.0982825	0.0803182	0.137807	0.157626	0.142437	0.140421	0.13186	0.132059	Inhibite_TFs	4.62563e-07	0	Inhibited
PKNOX2	0.0576973	0.0232913	0.0845425	0.101602	0.0854729	0.0772453	0.0721202	0.0699066	Novel	1	0.000112276	Inhibited
NFIB	0.087188	0.0527322	0.123518	0.108116	0.118552	0.109538	0.123905	0.121834	Novel	0.45006	0	Inhibited
ZNF91	0.0828206	0.056868	0.106352	0.106938	0.112306	0.0989862	0.107609	0.118065	Inhibite_TFs	0.174967	4.66445e-11	Inhibited
CUX1	0.0639824	0.0423024	0.0870691	0.0789508	0.0849054	0.0751992	0.0784098	0.0953152	Inhibite_TFs	0.565887	0	Inhibited
NR3C1	0.0470595	0.0357365	0.0594617	0.053455	0.0593822	0.0506751	0.0571921	0.0611683	Inhibite_TFs	1	3.07299e-11	Inhibited
SOX5	0.131492	0.0544431	0.206384	0.234342	0.258046	0.225642	0.185172	0.2797	Inhibite_TFs	1	2.14873e-12	Inhibited
CHD2	0.0418168	0.0354877	0.0461951	0.0443998	0.0471964	0.0436483	0.0427508	0.0497251	Inhibite_TFs	0.900189	0.00526576	Inhibited
NRF1	0.0331129	0.0263892	0.0344848	0.0360386	0.0363399	0.0343037	0.033795	0.0385862	Inhibite_TFs	1	0.787504	Inhibited
MKX	0.0615736	0.0451223	0.10257	0.151952	0.142737	0.147438	0.125538	0.176759	Inhibite_TFs	1	0.00690215	Inhibited
PKNOX1	0.0516469	0.0358888	0.0657557	0.0765811	0.0821658	0.0827528	0.0769396	0.100351	Novel	0.700944	0.0267814	Inhibited
TEAD1	0.0430824	0.0268492	0.0698397	0.0870317	0.0990737	0.0808824	0.108653	0.0953857	Inhibite_TFs	1	3.34912e-05	Inhibited
FOXP2	0.060817	0.0443202	0.0749803	0.0835767	0.0782965	0.0878427	0.0853243	0.0770069	Inhibite_TFs	0.155492	0	Inhibited
ARNTL	0.045724	0.0374011	0.0556373	0.0556605	0.0550334	0.0569958	0.0585424	0.0573897	Novel	0.289615	0.263374	Inhibited
ZEB1	0.0628231	0.0400139	0.0813245	0.0909891	0.0878071	0.0847711	0.087479	0.083526	Inhibite_TFs	0.999994	0	Inhibited
TCF12	0.0693491	0.0484817	0.0935787	0.0522911	0.116088	0.0748921	0.0794801	0.0801779	Inhibite_TFs	1	0.324437	Inhibited
ESRRG	0.152543	0.0552531	0.271992	0.225622	0.365384	0.317278	0.283805	0.225141	Novel	1	4.57462e-06	Inhibited
ZNF831	0.0618046	0.0321566	0.0721826	0.0768657	0.108124	0.0739185	0.0826475	0.0854361	Novel	1	1	Inhibited
KDM5A	0.0347482	0.029458	0.0365611	0.0337848	0.0357534	0.0339717	0.035722	0.0365897	Inhibite_TFs	0.984765	0.180731	Inhibited
MEIS2	0.124845	0.0523861	0.195667	0.114597	0.15296	0.154903	0.195878	0.157055	Novel	0.766351	9.30692e-07	Inhibited
ETV6	0.0258488	0.02007	0.028083	0.0252973	0.0294464	0.0232318	0.0324566	0.023918	Novel	0.87378	0.0984035	Inhibited
ARNT	0.031381	0.017593	0.031758	0.0317506	0.0356017	0.0198264	0.0333388	0.033169	Inhibite_TFs	1	0.0142245	Inhibited
MXD4	0.0598236	0.0553617	0.0665955	0.0640771	0.0641767	0.0578931	0.068772	0.0653388	Activate_TFs	0.0718047	0.012063	Inhibited

## Sheet: Common TFs
Table.S7. Details of the transcription factor lists and identified from the SCENIC algorithm with pathway enrichment analysis.
Common transcription factors identifeid in separated analyses
Symbol	Number of common dataset	StatusByIntegratedDataset		Symbol	Number of common dataset	StatusByIntegratedDataset
ATF4(+)	6	Activated		BCL11A(+)	6	Inhibited
BCLAF1(+)	6	Activated		CUX1(+)	6	Inhibited
BHLHE40(+)	6	Activated		FOXP2(+)	6	Inhibited
CEBPB(+)	6	Activated		KDM5A(+)	6	Inhibited
CTCF(+)	6	Activated		NR3C1(+)	6	Inhibited
EGR3(+)	6	Activated		NRF1(+)	6	Inhibited
FOXO3(+)	6	Inhibited		TCF12(+)	6	Inhibited
GABPB1(+)	6	Activated		ZEB1(+)	6	Inhibited
HDAC2(+)	6	Activated		CHD2(+)	5	Inhibited
JUN(+)	6	Activated		EP300(+)	5	NA
KLF13(+)	6	NA		ETV5(+)	5	Inhibited
KLF6(+)	6	Activated		FOXN3(+)	5	Inhibited
KLF9(+)	6	Activated		MEF2A(+)	5	Inhibited
MAZ(+)	6	Activated		POU2F2(+)	5	Inhibited
NR2C2(+)	6	Activated		SOX5(+)	5	Inhibited
POLR2A(+)	6	Activated		TAF1(+)	5	Activated
RBBP5(+)	6	Activated		TEAD1(+)	5	Inhibited
SIN3A(+)	6	Activated		TRPS1(+)	5	NA
SP3(+)	6	Activated		ARNT(+)	4	Inhibited
TAF7(+)	6	Activated		BACH2(+)	4	Inhibited
YY1(+)	6	Activated		ETV6(+)	4	NA
E2F4(+)	5	Activated		FOXN2(+)	4	Inhibited
EGR1(+)	5	Activated		JUND(+)	4	Inhibited
ELK4(+)	5	Activated		NFIB(+)	4	NA
ESRRA(+)	5	Activated		ONECUT2(+)	4	NA
ETS2(+)	5	Activated		PBX1(+)	4	Inhibited
FOXK1(+)	5	NA		PKNOX2(+)	4	NA
HSF2(+)	5	NA		POU2F1(+)	4	NA
JDP2(+)	5	Activated		ZFHX3(+)	4	Inhibited
LHX2(+)	5	Inhibited		ZNF91(+)	4	Inhibited
MAX(+)	5	Activated		ATF1(+)	3	Activated
MXI1(+)	5	Activated		ATF2(+)	3	Inhibited
NFE2L1(+)	5	NA		ATF6(+)	3	Inhibited
PHF8(+)	5	Activated		BRF1(+)	3	Activated
RAD21(+)	5	Activated		CREB1(+)	3	Activated
RXRB(+)	5	Activated		ESRRG(+)	3	NA
SETDB1(+)	5	Activated		FOXJ3(+)	3	NA
STAT5B(+)	5	Activated		HIVEP1(+)	3	Inhibited
TEF(+)	5	Activated		IRF2(+)	3	Activated
TFDP1(+)	5	Activated		MEF2C(+)	3	Inhibited
UBTF(+)	5	Activated		MLXIPL(+)	3	Activated
ARID3A(+)	4	Activated		NFE2L2(+)	3	Activated
ATF6B(+)	4	Activated		NR2C1(+)	3	Activated
BHLHE41(+)	4	Activated		PBX3(+)	3	Inhibited
CEBPZ(+)	4	NA		PPARG(+)	3	Inhibited
CLOCK(+)	4	Activated		PPARGC1A(+)	3	Activated
ELK1(+)	4	Activated		PUM3(+)	3	NA
EMX1(+)	4	NA		RARB(+)	3	Inhibited
HLF(+)	4	Activated		RCOR1(+)	3	Activated
NFKB1(+)	4	Activated		RFX1(+)	3	Activated
NR2F1(+)	4	Activated		RFX2(+)	3	Inhibited
NR2F6(+)	4	Activated		SMAD1(+)	3	NA
PSMD12(+)	4	NA		TBL1XR1(+)	3	Inhibited
SMARCC2(+)	4	Activated		TCF4(+)	3	Inhibited
SMC3(+)	4	NA		UBE2K(+)	3	Activated
SP4(+)	4	Activated		ZFHX2(+)	3	Activated
SREBF2(+)	4	Activated		ZFP64(+)	3	NA
STAT2(+)	4	NA		ARNT2(+)	2	NA
STAT3(+)	4	NA		ARNTL(+)	2	NA
THRA(+)	4	Activated		BDP1(+)	2	Inhibited
TRIM28(+)	4	Activated		BPTF(+)	2	Inhibited
USF2(+)	4	Activated		CREB5(+)	2	Inhibited
ZBTB7A(+)	4	Activated		CREM(+)	2	NA
ZFX(+)	4	NA		CUX2(+)	2	NA
ZNF362(+)	4	NA		ELF2(+)	2	Inhibited
ATF2(+)	3	Inhibited		FOXK2(+)	2	NA
BRF1(+)	3	Activated		FOXP1(+)	2	Inhibited
CEBPD(+)	3	Activated		GLIS1(+)	2	NA
CPEB1(+)	3	Activated		GTF3C2(+)	2	NA
CREB1(+)	3	Activated		HIVEP2(+)	2	NA
ELF2(+)	3	Inhibited		HLF(+)	2	Activated
FOSL2(+)	3	Activated		HMBOX1(+)	2	NA
FOXG1(+)	3	Activated		IKZF2(+)	2	Inhibited
FOXJ3(+)	3	NA		KLF7(+)	2	Activated
GABPA(+)	3	Activated		KMT2A(+)	2	NA
GTF2B(+)	3	Activated		MEIS2(+)	2	NA
GTF2F1(+)	3	Activated		MZF1(+)	2	NA
HSF1(+)	3	NA		NFAT5(+)	2	NA
KLF16(+)	3	Activated		NFATC3(+)	2	Inhibited
KLF7(+)	3	Activated		NFIA(+)	2	NA
MECP2(+)	3	NA		NPAS2(+)	2	NA
MEF2D(+)	3	Activated		NR6A1(+)	2	Activated
MXD1(+)	3	Activated		PLAGL1(+)	2	NA
NEUROD2(+)	3	NA		RFX7(+)	2	NA
NFIC(+)	3	Activated		RUNX1(+)	2	Activated
NFYB(+)	3	Activated		SMAD3(+)	2	NA
PKM(+)	3	Activated		SMAD4(+)	2	NA
PKNOX1(+)	3	NA		SP4(+)	2	Activated
POLR3A(+)	3	NA		SREBF2(+)	2	Activated
POU6F1(+)	3	Activated		STAT3(+)	2	NA
PPARD(+)	3	Activated		TCF7L2(+)	2	Activated
RCOR1(+)	3	Activated		USF2(+)	2	Activated
SMAD1(+)	3	NA		ZBTB7A(+)	2	Activated
SRF(+)	3	Activated		ZNF131(+)	2	NA
STAT1(+)	3	Activated		ZNF235(+)	2	NA
TCF7L2(+)	3	Activated		ZNF362(+)	2	NA
ZNF189(+)	3	NA		ZNF429(+)	2	NA
ZNF281(+)	3	Activated		ZNF568(+)	2	NA
ZNF84(+)	3	NA		ZNF76(+)	2	Activated
AGGF1(+)	2	NA		ZNF831(+)	2	NA
ARNT(+)	2	Inhibited		ABL1(+)	1	NA
ARNTL(+)	2	NA		ARID5B(+)	1	NA
ATF1(+)	2	Activated		ARNTL2(+)	1	NA
ATF6(+)	2	Inhibited		ATF6B(+)	1	Activated
CCNT2(+)	2	NA		BAD(+)	1	NA
CEBPG(+)	2	Activated		CEBPD(+)	1	Activated
CHD1(+)	2	NA		CELF5(+)	1	NA
CREB3(+)	2	NA		CERS4(+)	1	NA
CREBL2(+)	2	Activated		CERS5(+)	1	NA
CREM(+)	2	NA		CERS6(+)	1	NA
DBP(+)	2	NA		CHD1(+)	1	NA
E2F3(+)	2	Inhibited		CTNNB1(+)	1	NA
FOXN2(+)	2	Inhibited		DNMT3A(+)	1	NA
GLIS1(+)	2	NA		E2F3(+)	1	Inhibited
GTF3A(+)	2	Activated		ELK1(+)	1	Activated
HES4(+)	2	Inhibited		ELK4(+)	1	Activated
HIF1A(+)	2	NA		ESR2(+)	1	NA
IRF2(+)	2	Activated		ETS2(+)	1	Activated
JUND(+)	2	Inhibited		FOXK1(+)	1	NA
MAFG(+)	2	NA		GABPA(+)	1	Activated
MGA(+)	2	Activated		HCFC2(+)	1	NA
MNT(+)	2	NA		HMGB1(+)	1	NA
NFE2L2(+)	2	Activated		HSF1(+)	1	NA
NFYC(+)	2	Activated		KDM7A(+)	1	NA
NR1D1(+)	2	Activated		KLF12(+)	1	NA
NR1D2(+)	2	Activated		LRRFIP1(+)	1	NA
NR1H2(+)	2	Activated		MAX(+)	1	Activated
POU3F2(+)	2	NA		MECOM(+)	1	NA
PPARG(+)	2	Inhibited		MEF2D(+)	1	Activated
RB1(+)	2	NA		MEIS3(+)	1	Activated
RBPJ(+)	2	NA		MGA(+)	1	Activated
REL(+)	2	NA		MKX(+)	1	Inhibited
RFX1(+)	2	Activated		MLXIP(+)	1	NA
RFXAP(+)	2	NA		MRPS25(+)	1	NA
RUNX1(+)	2	Activated		MTA3(+)	1	NA
SCRT1(+)	2	NA		MXD4(+)	1	Activated
SMAD2(+)	2	Activated		MXI1(+)	1	Activated
SMAD5(+)	2	NA		MYEF2(+)	1	NA
STAT6(+)	2	Activated		MYPOP(+)	1	NA
TBPL1(+)	2	NA		NFE2L1(+)	1	NA
TFCP2(+)	2	NA		NFIC(+)	1	Activated
UBP1(+)	2	NA		NFKB1(+)	1	Activated
ZMAT2(+)	2	NA		NR1H2(+)	1	Activated
ZNF135(+)	2	NA		NR2F1(+)	1	Activated
ZNF155(+)	2	NA		PHF8(+)	1	Activated
ZNF544(+)	2	NA		PKM(+)	1	Activated
ZNF658(+)	2	NA		PKNOX1(+)	1	NA
ZNF76(+)	2	Activated		POLR3G(+)	1	NA
AHR(+)	1	NA		POU6F1(+)	1	Activated
ARG2(+)	1	NA		PPARD(+)	1	Activated
ASCC1(+)	1	NA		PRNP(+)	1	NA
ATF7(+)	1	NA		RAD21(+)	1	Activated
BBX(+)	1	NA		RFX4(+)	1	NA
CERS4(+)	1	NA		RXRB(+)	1	Activated
CERS5(+)	1	NA		SETDB1(+)	1	Activated
CHD2(+)	1	Inhibited		SMARCC1(+)	1	NA
CHURC1(+)	1	NA		SNAI3(+)	1	NA
CPSF4(+)	1	NA		SNAPC4(+)	1	NA
DDIT3(+)	1	NA		SOX6(+)	1	NA
DEAF1(+)	1	Activated		STAT4(+)	1	NA
DNMT3A(+)	1	NA		STAT5B(+)	1	Activated
DUSP26(+)	1	NA		STAU2(+)	1	NA
E4F1(+)	1	NA		TBR1(+)	1	NA
EP300(+)	1	NA		TFCP2(+)	1	NA
ETV5(+)	1	Inhibited		TPI1(+)	1	NA
ETV6(+)	1	NA		TRMT1(+)	1	NA
EWSR1(+)	1	NA		UBP1(+)	1	NA
FOXK2(+)	1	NA		UBTF(+)	1	Activated
GTF2A1(+)	1	NA		ZBTB11(+)	1	NA
GTF2I(+)	1	NA		ZFX(+)	1	NA
GTF2IRD1(+)	1	Activated		ZNF146(+)	1	NA
GTPBP6(+)	1	NA		ZNF148(+)	1	NA
HBP1(+)	1	Activated		ZNF248(+)	1	NA
HIC2(+)	1	NA		ZNF331(+)	1	NA
HINFP(+)	1	NA		ZNF33A(+)	1	NA
HNRNPH3(+)	1	NA		ZNF33B(+)	1	NA
HSF4(+)	1	NA		ZNF37A(+)	1	NA
ID2(+)	1	NA		ZNF43(+)	1	NA
IKZF2(+)	1	Inhibited		ZNF493(+)	1	NA
JUNB(+)	1	NA		ZNF519(+)	1	Activated
LARP4(+)	1	NA		ZNF562(+)	1	NA
MEIS3(+)	1	Activated		ZNF565(+)	1	NA
MIOS(+)	1	NA		ZNF583(+)	1	NA
MLXIP(+)	1	NA		ZNF589(+)	1	NA
MLXIPL(+)	1	Activated		ZNF623(+)	1	NA
MZF1(+)	1	NA		ZNF667(+)	1	Activated
NFATC3(+)	1	Inhibited		ZNF721(+)	1	NA
NFIX(+)	1	NA		ZNF736(+)	1	NA
NONO(+)	1	NA		ZNF75A(+)	1	NA
NPAS2(+)	1	NA		ZNF782(+)	1	NA
NPDC1(+)	1	NA		ZNF790(+)	1	NA
NR1H3(+)	1	NA		ZNF814(+)	1	Activated
NR2C1(+)	1	Activated		ZNF84(+)	1	NA
POU2F2(+)	1	Inhibited		ZSCAN31(+)	1	NA
PRDX5(+)	1	NA
PRKAA1(+)	1	NA
PRKAA2(+)	1	NA
PSMC2(+)	1	NA
PURA(+)	1	NA
RAB14(+)	1	NA
RAB2A(+)	1	NA
RBM17(+)	1	NA
RFX4(+)	1	NA
RLF(+)	1	NA
SF1(+)	1	NA
SIRT6(+)	1	NA
SMARCA1(+)	1	NA
SNAI3(+)	1	NA
SOX15(+)	1	NA
SP1(+)	1	NA
SREBF1(+)	1	NA
TAF1(+)	1	Activated
TBP(+)	1	NA
TCFL5(+)	1	NA
TERF1(+)	1	NA
TFAM(+)	1	NA
TFAP2E(+)	1	NA
TOB2(+)	1	NA
TOPORS(+)	1	NA
TRMT1(+)	1	NA
UBE2K(+)	1	Activated
WRNIP1(+)	1	NA
XBP1(+)	1	NA
YBX1(+)	1	NA
ZBTB18(+)	1	NA
ZFP14(+)	1	NA
ZFP64(+)	1	NA
ZFP90(+)	1	NA
ZFY(+)	1	NA
ZNF131(+)	1	NA
ZNF235(+)	1	NA
ZNF25(+)	1	Activated
ZNF251(+)	1	NA
ZNF26(+)	1	NA
ZNF335(+)	1	NA
ZNF33B(+)	1	NA
ZNF345(+)	1	Inhibited
ZNF358(+)	1	NA
ZNF410(+)	1	NA
ZNF420(+)	1	NA
ZNF429(+)	1	NA
ZNF444(+)	1	NA
ZNF451(+)	1	NA
ZNF471(+)	1	NA
ZNF568(+)	1	NA
ZNF592(+)	1	NA
ZNF623(+)	1	NA
ZNF667(+)	1	Activated
ZNF675(+)	1	NA
ZNF692(+)	1	NA
ZNF706(+)	1	NA
ZNF709(+)	1	NA
ZNF713(+)	1	NA
ZNF714(+)	1	NA
ZNF718(+)	1	NA
ZNF770(+)	1	NA
ZNF782(+)	1	NA
ZNF786(+)	1	NA
ZNF789(+)	1	NA
ZNF81(+)	1	NA
ZNF814(+)	1	Activated
ZNF83(+)	1	NA
ZNF831(+)	1	NA
ZNF91(+)	1	Inhibited
ZSCAN18(+)	1	NA
ZSCAN5A(+)	1	NA

## Sheet: Separated analysis
Table.S7. Details of the transcription factor lists and identified from the SCENIC algorithm with pathway enrichment analysis.
Pathway enrichment analysis of common TFs identified in separated analysis setting
Common activated TFs			Index	Name	P-value
SP3			1	TNF-alpha Signaling via NF-kB	4.442e-08
CEBPB			2	Hypoxia	5.083e-05
CTCF			3	Unfolded Protein Response	0.006194
SIN3A			4	Apoptosis	0.01223
FOXO3			5	IL-2/STAT5 Signaling	0.01827
KLF13			6	p53 Pathway	0.01844
KLF6			7	Estrogen Response Early	0.01844
POLR2A			8	Wnt-beta Catenin Signaling	0.04321
GABPB1			9	IL-6/JAK/STAT3 Signaling	0.08753
NR2C2			10	UV Response Dn	0.1409
MAZ
BCLAF1
RBBP5
BHLHE40
HDAC2
TAF7
YY1
ATF4
KLF9
EGR3
JUN
Common inactivated TFs			Index	Name	P-value
NRF1			1	UV Response Dn	0.05618
TCF12			2	Hypoxia	0.07727
KDM5A			3	Complement	0.07727
BCL11A			4	heme Metabolism	0.07727
NR3C1
CUX1
FOXP2
ZEB1
